# Supplementary material for: GWAS Meta-Analysis Reveals Shared Genes and Biological Pathways between Major Depressive Disorder and Insomnia
Source: Genes (Basel). 2021 Sep 26;12(10):1506. doi: 10.3390/genes12101506 (PMC8536096; doi:10.3390/genes12101506)
Supplement: Supplementary file 1 [file genes-12-01506-s001.zip › Supplementary Tables_R1.xlsx]

## Sheet: Table S1
Supplementary Table S1. Summary of the datasets used in this study
Study	Genomnic risk loci	Lead SNPs	Independent significant SNPs	Candidate SNPs
Meta-analysis	54	62	130	7062
MDD (Wray, et al.)	5	7	16	1460
Insomnia (Lane, et al.)	45	58	137	6376

## Sheet: Table S2
Supplementary Table S2. Lead SNP results from meta-analysis
rsID	chr	pos (bp)	nIndSigSNPs	IndSigSNPs	non_effect_allele	effect_allele	MAF	gwasP	nearestGene	dist	func
rs113851554	2	66750564	6	rs113851554;rs182588061;rs6735071;rs60751869;rs72826719;rs62144053	T	G	0.05268	1.64e-22	MEIS1	0	intronic
rs12658032	5	103904226	8	rs12658032;rs1363103;rs67597604;rs396755;rs1976423;rs349586;rs55649128;rs10042031	A	G	0.3559	3.77e-19	RP11-6N13.1	0	ncRNA_intronic
rs12552	13	53625781	9	rs12552;rs9536347;rs2806985;rs1951722;rs2491124;rs9536383;rs4525388;rs7332332;rs6561724	A	G	0.4573	5.69e-16	OLFM4	0	UTR3
rs201018268	17	43227625	1	rs201018268	C	G	0.000994	1.2e-15	HEXIM1	0	exonic
rs9320016	18	53095471	10	rs9320016;rs12958048;rs10503002;rs2924328;rs1942262;rs1261081;rs1893431;rs893946;rs1788030;rs4801150	T	C	0.3907	1.09e-13	TCF4	0	intronic
rs6724384	2	58879493	5	rs6724384;rs17049689;rs112011984;rs1861410;rs6545695	T	C	0.4364	2.1e-13	LINC01122	0	ncRNA_intronic
rs10509759	10	104689665	1	rs10509759	A	T	0.08946	6.35e-13	CNNM2	0	intronic
rs558237097	17	43251372	1	rs558237097	T	C	0.001988	1.4e-12	RP13-890H12.2	2420	intergenic
rs10156602	9	96345328	3	rs10156602;rs7033146;rs7851271	A	G	0.3946	1.67e-12	PHF2	0	intronic
rs2815757	1	72764289	5	rs2815757;rs2815752;rs4649956;rs782202;rs2126077	T	C	0.175	3.64e-12	RPL31P12	2865	intergenic
rs10865954	3	49211989	3	rs10865954;rs2029591;rs7617480	T	C	0.326	1.28e-11	KLHDC8B	0	intronic
rs575346808	17	43202539	1	rs575346808	A	T	0.01193	2.5e-11	PLCD3	0	intronic
rs6446187	3	49907111	4	rs6446187;rs4688760;rs3774750;rs2029591	A	C	0.4901	6.26e-11	CAMKV	0	intronic
rs2494112	1	201787833	5	rs2494112;rs2644109;rs11577900;rs2279681;rs7551784	A	G	0.4861	1.28e-10	NAV1:IPO9-AS1	00:00:00	ncRNA_intronic
rs8013655	14	42089908	1	rs8013655	T	C	0.4692	3.3e-10	LRFN5	0	intronic
rs4713177	6	28673998	1	rs4713177	A	G	0.07256	3.64e-10	RPSAP2	25795	intergenic
rs60289499	17	43218677	2	rs60289499;rs4986172	A	G	0.2992	4.67e-10	ACBD4	0	intronic
rs2509805	11	57650796	1	rs2509805	T	C	0.3032	6.05e-10	RP11-734C14.2	12752	intergenic
rs2838788	21	46542374	1	rs2838788	T	C	0.3867	1.22e-09	ADARB1	0	intronic
rs1228001	11	47986994	4	rs1228001;rs75184591;rs11040048;rs7111957	A	T	0.4811	1.24e-09	PTPRJ	15118	intergenic
rs395523	6	105396187	2	rs395523;rs370771	C	G	0.3429	1.24e-09	LINC00577	7784	intergenic
rs62158206	2	114084596	1	rs62158206	T	C	0.2167	1.29e-09	PAX8	48068	intergenic
rs1520946	15	37631221	2	rs1520946;rs614443	T	G	0.3807	1.5e-09	RP11-720L8.1	26006	intergenic
rs7809203	7	1087454	2	rs7809203;rs6945202	T	C	0.4722	2.18e-09	C7orf50:GPR146	00:00:00	intronic
rs10269313	7	82428754	2	rs10269313;rs2189247	C	G	0.3688	2.46e-09	PCLO	0	intronic
rs12767131	10	104268626	1	rs12767131	T	C	0.3012	2.58e-09	SUFU	0	intronic
rs529656112	17	43259999	1	rs529656112	A	G	0.000994	3.1e-09	CTD-2020K17.1	8298	intergenic
rs4577309	2	191288833	1	rs4577309	A	G	0.4602	3.36e-09	MFSD6	0	intronic
rs12405761	1	57850914	1	rs12405761	A	C	0.4165	3.77e-09	DAB1	0	intronic
rs2722442	8	40372061	2	rs2722442;rs11783990	A	C	0.3171	4.01e-09	RP11-301G7.1	5022	intergenic
rs62004865	15	74207695	2	rs62004865;rs35917667	A	T	0.09642	4.19e-09	LOXL1-AS1	0	ncRNA_intronic
rs1526565	11	131639170	1	rs1526565	T	C	0.4722	4.22e-09	NTM	0	intronic
rs10953758	7	114029863	1	rs10953758	A	G	0.4334	4.77e-09	FOXP2	0	intronic
rs7753317	6	101220433	3	rs7753317;rs7769142;rs9322076	A	G	0.4891	6.14e-09	ASCC3	0	intronic
rs7357627	9	120535345	2	rs7357627;rs10818076	A	G	0.3678	6.44e-09	RP11-281A20.2	10380	intergenic
rs12187247	5	91504374	1	rs12187247	C	G	0.2256	7.73e-09	RP11-348J24.2	0	ncRNA_intronic
rs528504	19	37447348	1	rs528504	T	C	0.3618	7.9e-09	ZNF568	0	intronic
rs75606464	17	21337440	1	rs75606464	A	C	0.002982	8.4e-09	PDLIM1P2	10704	intergenic
rs35393419	12	109881809	2	rs35393419;rs6606728	T	C	0.2624	8.57e-09	MYO1H	0	intronic
rs35735593	16	6112998	3	rs35735593;rs34315978;rs7198605	C	G	0.4583	8.64e-09	RP11-420N3.2:RBFOX1:RP11-509E10.1	00:00:00	ncRNA_intronic
rs247909	5	87592024	2	rs247909;rs27732	T	C	0.4871	8.76e-09	TMEM161B-AS1	0	ncRNA_intronic
rs71573104	7	114249522	1	rs71573104	A	G	0.09642	9.61e-09	FOXP2	0	intronic
rs9576155	13	37600284	1	rs9576155	A	G	0.325	9.77e-09	SUPT20H	0	intronic
rs6765491	3	143836690	1	rs6765491	A	G	0.3857	1.22e-08	RNA5SP144	69056	intergenic
rs801733	11	65934549	1	rs801733	A	C	0.3579	1.38e-08	PACS1	0	intronic
rs17043773	2	53133809	2	rs17043773;rs11125445	T	C	0.2664	1.46e-08	AC010967.2	0	ncRNA_intronic
rs11773627	7	2002733	2	rs11773627;rs11760737	T	C	0.2247	1.49e-08	MAD1L1	0	intronic
rs35641559	1	73760104	3	rs35641559;rs4593766;rs17570390	T	C	0.4533	1.97e-08	RP4-598G3.1	11748	intergenic
rs62519760	8	114119452	1	rs62519760	T	C	0.2664	2.01e-08	CSMD3	0	intronic
rs58104186	7	109099919	1	rs58104186	A	G	0.4771	2.11e-08	AC073071.1	62118	intergenic
rs137959292	2	215497929	1	rs137959292	C	G	0.1471	2.26e-08	AC107218.3	0	ncRNA_intronic
rs776935	8	107747281	1	rs776935	A	G	0.168	2.91e-08	OXR1	0	intronic
rs71557335	6	26368279	1	rs71557335	A	G	0.1123	2.96e-08	BTN3A2	0	splicing
rs58942037	2	208019791	1	rs58942037	T	C	0.3688	3.04e-08	KLF7	0	intronic
rs6063085	20	45840459	1	rs6063085	A	C	0.3668	3.78e-08	ZMYND8	0	intronic
rs12125521	1	214442481	1	rs12125521	T	C	0.2962	4.4e-08	SMYD2	11963	intergenic
rs12537732	7	52579804	1	rs12537732	T	C	0.2117	4.67e-08	snoU13	188218	intergenic
rs9861346	3	117508846	1	rs9861346	T	C	0.1511	4.7e-08	LSAMP:RP11-384F7.2	00:00:00	ncRNA_intronic
rs12607631	18	52843484	7	rs12607631;rs1942262;rs1261081;rs1893431;rs893946;rs1788030;rs4801150	T	C	0.2207	4.77e-08	RNA5SP459	29607	intergenic
rs78826028	1	87719486	1	rs78826028	A	C	0.332	4.8e-08	LMO4	74664	intergenic
rs2014208	6	37700319	1	rs2014208	T	C	0.3996	4.85e-08	MDGA1	33236	intergenic
rs360241	2	127027052	1	rs360241	A	G	0.17	4.96e-08	AC023347.1	39034	intergenic

## Sheet: Table S3
Supplementary Table S3. Results from tissue expression analysis
VARIABLE	TYPE	NGENES	BETA	BETA_STD	SE	P	FULL_NAME
Adipose_Subcutaneous	COVAR	17271	-0.032605	-0.065095	0.0092981	0.99977	Adipose_Subcutaneous
Adipose_Visceral_Omentum	COVAR	17271	-0.042688	-0.082937	0.0096387	1	Adipose_Visceral_Omentum
Adrenal_Gland	COVAR	17271	-0.012082	-0.02332	0.0086246	0.91936	Adrenal_Gland
Artery_Aorta	COVAR	17271	-0.012595	-0.025715	0.0088318	0.92308	Artery_Aorta
Artery_Coronary	COVAR	17271	-0.025747	-0.051274	0.010268	0.99391	Artery_Coronary
Artery_Tibial	COVAR	17271	-0.014354	-0.029565	0.0087012	0.95048	Artery_Tibial
Bladder	COVAR	17271	-0.033139	-0.064639	0.011362	0.99823	Bladder
Brain_Amygdala	COVAR	17271	0.01698	0.028932	0.0068511	0.0066039	Brain_Amygdala
Brain_Anterior_cingulate_cor...	COVAR	17271	0.021663	0.038283	0.006297	0.00029138	Brain_Anterior_cingulate_cortex_BA24
Brain_Caudate_basal_ganglia	COVAR	17271	0.014556	0.025149	0.0068572	0.0169	Brain_Caudate_basal_ganglia
Brain_Cerebellar_Hemisphere	COVAR	17271	0.031841	0.063933	0.0053091	1.0246e-09	Brain_Cerebellar_Hemisphere
Brain_Cerebellum	COVAR	17271	0.033731	0.066998	0.005488	4.0641e-10	Brain_Cerebellum
Brain_Cortex	COVAR	17271	0.024942	0.04551	0.0062078	2.9508e-05	Brain_Cortex
Brain_Frontal_Cortex_BA9	COVAR	17271	0.023671	0.043646	0.0059871	3.8645e-05	Brain_Frontal_Cortex_BA9
Brain_Hippocampus	COVAR	17271	0.017619	0.02984	0.0069723	0.0057583	Brain_Hippocampus
Brain_Hypothalamus	COVAR	17271	0.019906	0.034272	0.0070601	0.0024078	Brain_Hypothalamus
Brain_Nucleus_accumbens_basa...	COVAR	17271	0.018454	0.03203	0.0066294	0.0026902	Brain_Nucleus_accumbens_basal_ganglia
Brain_Putamen_basal_ganglia	COVAR	17271	0.013659	0.023245	0.0069042	0.02395	Brain_Putamen_basal_ganglia
Brain_Spinal_cord_cervical_c...	COVAR	17271	0.011544	0.020749	0.0074366	0.060307	Brain_Spinal_cord_cervical_c-1
Brain_Substantia_nigra	COVAR	17271	0.009634	0.016584	0.0074376	0.097617	Brain_Substantia_nigra
Breast_Mammary_Tissue	COVAR	17271	-0.034164	-0.065735	0.010916	0.99912	Breast_Mammary_Tissue
Cells_Cultured_fibroblasts	COVAR	17271	0.0015509	0.0033241	0.0056938	0.39267	Cells_Cultured_fibroblasts
Cells_EBV-transformed_lympho...	COVAR	17271	0.00032014	0.00069805	0.0041819	0.46949	Cells_EBV-transformed_lymphocytes
Cervix_Ectocervix	COVAR	17271	-0.0063564	-0.012468	0.010525	0.72706	Cervix_Ectocervix
Cervix_Endocervix	COVAR	17271	-0.0027503	-0.0054494	0.010028	0.60805	Cervix_Endocervix
Colon_Sigmoid	COVAR	17271	-0.011613	-0.022733	0.010757	0.85984	Colon_Sigmoid
Colon_Transverse	COVAR	17271	-0.024506	-0.045079	0.010009	0.99282	Colon_Transverse
Esophagus_Gastroesophageal_J...	COVAR	17271	-0.018285	-0.03601	0.011057	0.9509	Esophagus_Gastroesophageal_Junction
Esophagus_Mucosa	COVAR	17271	-0.014852	-0.028725	0.0066428	0.98731	Esophagus_Mucosa
Esophagus_Muscularis	COVAR	17271	-0.019875	-0.03922	0.01069	0.9685	Esophagus_Muscularis
Fallopian_Tube	COVAR	17271	-0.014242	-0.027653	0.010204	0.91858	Fallopian_Tube
Heart_Atrial_Appendage	COVAR	17271	-0.01668	-0.029947	0.0081857	0.9792	Heart_Atrial_Appendage
Heart_Left_Ventricle	COVAR	17271	-0.010916	-0.018214	0.0078735	0.91717	Heart_Left_Ventricle
Kidney_Cortex	COVAR	17271	-0.01766	-0.031023	0.0078649	0.98762	Kidney_Cortex
Kidney_Medulla	COVAR	17271	-0.013952	-0.025803	0.008053	0.9584	Kidney_Medulla
Liver	COVAR	17271	-0.0079793	-0.014363	0.0055965	0.92302	Liver
Lung	COVAR	17271	-0.027367	-0.052959	0.0079009	0.99973	Lung
Minor_Salivary_Gland	COVAR	17271	-0.016411	-0.030564	0.0082274	0.97695	Minor_Salivary_Gland
Muscle_Skeletal	COVAR	17271	-0.00078222	-0.0014798	0.0060216	0.55168	Muscle_Skeletal
Nerve_Tibial	COVAR	17271	0.0017432	0.0035112	0.0087017	0.42061	Nerve_Tibial
Ovary	COVAR	17271	0.004108	0.0083313	0.0083052	0.31044	Ovary
Pancreas	COVAR	17271	-0.0088619	-0.014813	0.0073548	0.88587	Pancreas
Pituitary	COVAR	17271	0.029566	0.055148	0.0077965	7.493e-05	Pituitary
Prostate	COVAR	17271	-0.0089412	-0.016974	0.010371	0.80568	Prostate
Skin_Not_Sun_Exposed_Suprapu...	COVAR	17271	-0.0087054	-0.016797	0.0067215	0.90236	Skin_Not_Sun_Exposed_Suprapubic
Skin_Sun_Exposed_Lower_leg	COVAR	17271	-0.0093687	-0.018191	0.0067328	0.91795	Skin_Sun_Exposed_Lower_leg
Small_Intestine_Terminal_Ile...	COVAR	17271	-0.018618	-0.034256	0.0082932	0.98761	Small_Intestine_Terminal_Ileum
Spleen	COVAR	17271	-0.015649	-0.031017	0.0062686	0.99372	Spleen
Stomach	COVAR	17271	-0.025718	-0.046736	0.01038	0.99338	Stomach
Testis	COVAR	17271	0.0083416	0.014415	0.0048026	0.041212	Testis
Thyroid	COVAR	17271	-0.014656	-0.029047	0.0084204	0.9591	Thyroid
Uterus	COVAR	17271	-0.0057326	-0.011688	0.0093985	0.72905	Uterus
Vagina	COVAR	17271	-0.020215	-0.038694	0.0095713	0.98265	Vagina
Whole_Blood	COVAR	17271	-0.0076955	-0.013871	0.004876	0.94274	Whole_Blood

## Sheet: Table S4
Supplementary Table S4. Results from cell type specificity analysis in the mouse cerebellum
Dataset	Cell_type	NGENES	BETA	BETA_STD	SE	P	P.adj.pds	P.adj
DropViz_CB_level1	Neuron	15059	0.020118	0.054368	0.0042482	1.1e-06	9.92e-06	3.75e-05
DropViz_CB_level1	Polydendrocyte	15059	0.0029964	0.0092316	0.0030171	0.16033	1	1
DropViz_CB_level1	Astrocyte	15059	0.0047652	0.012762	0.0047998	0.16042	1	1
DropViz_CB_level1	Endothelial_stalk	15059	0.0005604	0.0015876	0.0043193	0.44839	1	1
DropViz_CB_level1	Microglia	15059	-0.0026578	-0.0081901	0.0029493	0.81625	1	1
DropViz_CB_level1	Mural	15059	-0.0048504	-0.01311	0.0039198	0.89202	1	1
DropViz_CB_level1	Endothelial_tip	15059	-0.0057369	-0.015545	0.0040338	0.9225	1	1
DropViz_CB_level1	Oligodendrocyte	15059	-0.0068634	-0.018727	0.004672	0.92908	1	1
DropViz_CB_level1	Choroid_plexus	15059	-0.0055754	-0.015455	0.0037682	0.9305	1	1
DropViz_CB_level2	Neuron_Slc17a7_Gabra6.1_1	15059	0.021048	0.059284	0.0053169	3.79e-05	0.00094708	0.00128802
DropViz_CB_level2	Neuron_Slc17a6_Nrgn.4_3	15059	0.011906	0.036908	0.0031059	6.35e-05	0.0015869	0.00215818
DropViz_CB_level2	Neuron_Gad1Gad2_Pvalb-Rab3b.3_2	15059	0.015816	0.045985	0.0043282	0.00012948	0.003237	0.00440232
DropViz_CB_level2	Neuron_Gad1Gad2_Pvalb-Nefh.3_1	15059	0.015231	0.043168	0.004437	0.0002998	0.007495	0.0101932
DropViz_CB_level2	Neuron_Gad1Gad2_Pvalb-Cadm1.3_3	15059	0.0094816	0.028344	0.0038333	0.0066969	0.167423	0.227695
DropViz_CB_level2	Neuron_Gad1Gad2_Lgi2.4_2	15059	0.0090293	0.026346	0.0038327	0.0092466	0.231165	0.314384
DropViz_CB_level2	Neuron_Slc17a6_Sln.4_1	15059	0.0073891	0.021724	0.0041327	0.036905	0.922625	1
DropViz_CB_level2	Neuron_Gad1Gad2_Pcp2.2_1	15059	0.0071518	0.020363	0.0041141	0.041084	1	1
DropViz_CB_level2	Neuron_Gad1Gad2_Pvalb-Chrm2.3_4	15059	0.0060556	0.018	0.0037994	0.055502	1	1
DropViz_CB_level2	Polydendrocyte_Tnr_Tnr.6_3	15059	0.0010415	0.0032088	0.0027799	0.35396	1	1
DropViz_CB_level2	Gja1_Gfap.8_1	15059	-1.32e-05	-4.1e-05	0.0027665	0.5019	1	1
DropViz_CB_level2	Oligodendroyte_Trf_Il33.6_1	15059	-7.81e-05	-0.0002157	0.0045091	0.50691	1	1
DropViz_CB_level2	Astrocyte_Gja_Slc1a3.7_1	15059	-0.0012845	-0.0035051	0.0048932	0.60353	1	1
DropViz_CB_level2	Endothelial_Stalk_Flt1_Lrg1.10_3	15059	-0.001071	-0.003185	0.0035415	0.61883	1	1
DropViz_CB_level2	Mural_Acta2Rgs5_Acta2.11_3	15059	-0.0009514	-0.0028844	0.0030726	0.62158	1	1
DropViz_CB_level2	Gja1_Htra1.8_2	15059	-0.0039545	-0.011236	0.0040913	0.83311	1	1
DropViz_CB_level2	Endothelial_Stalk_Flt1_Car4.10_2	15059	-0.0037028	-0.010941	0.0035806	0.84945	1	1
DropViz_CB_level2	Endothelial_Tip_Dcn_Apod.11_2	15059	-0.0033985	-0.01005	0.0029323	0.87676	1	1
DropViz_CB_level2	Microglia_C1qb_Mrc1-Tmem119.5_1	15059	-0.0037059	-0.01142	0.0027295	0.91271	1	1
DropViz_CB_level2	Endothelial_Stalk_Flt1_Mgp.10_1	15059	-0.005133	-0.015234	0.0035359	0.92669	1	1
DropViz_CB_level2	Mural_Acta2Rgs5_Rgs5.11_5	15059	-0.004327	-0.013523	0.0025592	0.95455	1	1
DropViz_CB_level2	Choroid_Plexus_Ttr.9_1	15059	-0.0075568	-0.020948	0.0034965	0.98465	1	1
DropViz_CB_level2	Mural_Acta2Rgs5_Kcnj8.11_4	15059	-0.0062973	-0.019909	0.0025656	0.99294	1	1
DropViz_CB_level2	Endothelial_Tip_Dcn_Nnat.11_1	15059	-0.0081004	-0.023389	0.0032476	0.99368	1	1
DropViz_CB_level2	Oligodendrocyte_Trf_Klk6.6_2	15059	-0.013968	-0.040545	0.0034288	0.99998	1	1

## Sheet: Table S5
Supplementary Table S5. Results from cell type specificity analysis in the mouse frontal cortex
Dataset	Cell_type	NGENES	BETA	BETA_STD	SE	P	P.adj.pds	P.adj
DropViz_FC_level1	Neuron	15059	0.026499	0.070226	0.0050718	8.85e-08	7.96e-07	7.96e-06
DropViz_FC_level1	Astrocyte	15059	0.0048768	0.012533	0.0062627	0.21808	1	1
DropViz_FC_level1	Polydendrocyte	15059	0.0037221	0.0097616	0.0069056	0.29495	1	1
DropViz_FC_level1	Oligodendrocyte	15059	0.0023953	0.006249	0.0059889	0.3446	1	1
DropViz_FC_level1	Mural	15059	-0.0036637	-0.0096563	0.0057869	0.73666	1	1
DropViz_FC_level1	Microglia	15059	-0.0031492	-0.008317	0.0043422	0.76584	1	1
DropViz_FC_level1	Endothelial_tip	15059	-0.0045209	-0.011785	0.0057671	0.78344	1	1
DropViz_FC_level1	Endothelial_stalk	15059	-0.009161	-0.024516	0.0053492	0.9566	1	1
DropViz_FC_level1	Macrophage	15059	-0.010963	-0.030694	0.0044047	0.99359	1	1
DropViz_FC_level2	Neuron_Slc17a7_Parm1_Lsamp.7_3	15059	0.040648	0.11112	0.0079342	1.52e-07	1.23e-05	1.37e-05
DropViz_FC_level2	Neuron_Slc17a7_Parm1_Nefm.7_6	15059	0.035703	0.097319	0.0079533	3.61e-06	0.00029205	0.0003245
DropViz_FC_level2	Neuron_Slc17a7_Parm1_Tshz2.7_7	15059	0.024497	0.068223	0.0065977	0.00010283	0.00832923	0.0092547
DropViz_FC_level2	Neuron_Slc17a7-Slc17a6_Nptxr-Rorb.6_3	15059	0.029196	0.079537	0.0081601	0.00017381	0.0140786	0.0156429
DropViz_FC_level2	Neuron_Slc17a7_Parm1_Nnat.7_2	15059	0.025238	0.070342	0.0070562	0.00017458	0.014141	0.0157122
DropViz_FC_level2	Neuron_Slc17a7_Nptxr-Fos.6_5	15059	0.026585	0.073305	0.0074866	0.00019252	0.0155941	0.0173268
DropViz_FC_level2	Neuron_Slc17a7_Syt6-Slc30a3.3_5	15059	0.026777	0.073762	0.0075957	0.00021219	0.0171874	0.0190971
DropViz_FC_level2	Neuron_Slc17a7_Nptxr-Deptor.6_4	15059	0.029414	0.080143	0.0085738	0.00030196	0.0244588	0.0271764
DropViz_FC_level2	Neuron_Slc17a6-Slc17a7_Nr4a2.5_1	15059	0.025686	0.070292	0.0076838	0.0004157	0.0336717	0.037413
DropViz_FC_level2	Neuron_Slc17a7_Syt6-Slc24a2.3_6	15059	0.019128	0.053398	0.0057507	0.00044145	0.0357575	0.0397305
DropViz_FC_level2	Neuron_Slc17a7_Nptxr-Calb1.6_1	15059	0.025968	0.070605	0.0078534	0.00047343	0.0383478	0.0426087
DropViz_FC_level2	Neuron_Slc17a7_Parm1_Ndnf.7_1	15059	0.024251	0.067105	0.0073502	0.00048573	0.0393441	0.0437157
DropViz_FC_level2	Neuron_Slc17a7_Parm1_Cadm2.7_5	15059	0.016313	0.045447	0.0051617	0.00078973	0.0639681	0.0710757
DropViz_FC_level2	Neuron_Slc17a7_Nptxr-Ndst4.6_2	15059	0.022408	0.061815	0.0075426	0.0014876	0.120496	0.133884
DropViz_FC_level2	Neuron_Gad1Gad2_Cplx3.1_1	15059	0.020329	0.055867	0.0072356	0.0024835	0.201163	0.223515
DropViz_FC_level2	Neuron_Slc17a7_Syt6-Kit.3_12	15059	0.023007	0.063642	0.008212	0.0025463	0.20625	0.229167
DropViz_FC_level2	Neuron_Gad1Gad2_Cplx3-Reln.1_2	15059	0.020073	0.055448	0.0074136	0.0033924	0.274784	0.305316
DropViz_FC_level2	Neuron_Gad1Gad2_Sst-Crh.2_4	15059	0.017168	0.04746	0.0067201	0.00532	0.43092	0.4788
DropViz_FC_level2	Neuron_Slc17a6-Slc17a7_Fezf2_3110035E14Rik.4_2	15059	0.014454	0.041104	0.0061693	0.0095734	0.775445	0.861606
DropViz_FC_level2	Neuron_Slc17a7_Syt6-Etv1.3_2	15059	0.016354	0.046154	0.0070303	0.010011	0.810891	0.90099
DropViz_FC_level2	Neuron_Slc17a7_Syt6-Sema5a.3_1	15059	0.018693	0.05131	0.0081645	0.011031	0.893511	0.99279
DropViz_FC_level2	Neuron_Gad1Gad2_Pvalb-Necab1.2_9	15059	0.01619	0.04421	0.007075	0.011065	0.896265	0.99585
DropViz_FC_level2	Neuron_Slc17a7_Syt6-Lypd1.3_7	15059	0.01732	0.047659	0.0081041	0.016301	1	1
DropViz_FC_level2	Neuron_Gad1Gad2_Synpr-Sncg.1_11	15059	0.013171	0.03674	0.0062923	0.018176	1	1
DropViz_FC_level2	Neuron_Gad1Gad2_Synpr-Pcdh11x.1_6	15059	0.014363	0.039574	0.0070143	0.020304	1	1
DropViz_FC_level2	Neuron_Gad1Gad2_Sst-Pdyn.2_2	15059	0.013165	0.036288	0.0064915	0.02129	1	1
DropViz_FC_level2	Neuron_Slc17a7_Syt6-Cyp26b1.3_4	15059	0.015631	0.043092	0.0080375	0.025912	1	1
DropViz_FC_level2	Neuron_Slc17a7-Slc17a8_Syt6-Cplx3.3_10	15059	0.01357	0.037751	0.0071863	0.029505	1	1
DropViz_FC_level2	Neuron_Slc17a6-Slc17a7-Slc17a8_Fezf2_Slc17a8.4_1	15059	0.014589	0.040085	0.0080833	0.03556	1	1
DropViz_FC_level2	Neuron_Gad1Gad2_Cplx3-Crim1.1_9	15059	0.0097293	0.027805	0.0057293	0.044749	1	1
DropViz_FC_level2	Neuron_Slc17a7_Parm1_Fos.7_4	15059	0.0063001	0.019346	0.0037748	0.047568	1	1
DropViz_FC_level2	Neuron_Gad1Gad2_Cplx3-Dpy19l1.1_8	15059	0.0077257	0.022811	0.0046338	0.047746	1	1
DropViz_FC_level2	Neuron_Slc17a7_Syt6-Efna5.3_3	15059	0.013481	0.037011	0.0081969	0.050028	1	1
DropViz_FC_level2	Neuron_Slc17a7_Syt6-Fos.3_13	15059	0.01245	0.03474	0.0075798	0.05025	1	1
DropViz_FC_level2	Neuron_Gad1Gad2_Synpr-Dpy19l1.1_7	15059	0.0087283	0.024862	0.0057596	0.064843	1	1
DropViz_FC_level2	Neuron_Gad1Gad2-Chat_Synpr-Slc5a7.1_5	15059	0.009558	0.026314	0.0069702	0.085156	1	1
DropViz_FC_level2	Neuron_Slc17a7_Syt6-Sema3c.3_9	15059	0.010716	0.029618	0.0078703	0.086671	1	1
DropViz_FC_level2	Neuron_Slc17a7_Syt6-Bdnf.3_11	15059	0.0074036	0.021443	0.0054891	0.088714	1	1
DropViz_FC_level2	Neuron_Gad1Gad2_Synpr-Crispld2.1_4	15059	0.0075631	0.021168	0.0061564	0.10964	1	1
DropViz_FC_level2	Neuron_Gad1Gad2_Synpr-Nnat.1_3	15059	0.005954	0.017284	0.0051364	0.1232	1	1
DropViz_FC_level2	Neuron_Gad1Gad2_Sst-Nr2f2.2_5	15059	0.0068195	0.018988	0.00646	0.14557	1	1
DropViz_FC_level2	Neuron_Gad1Gad2_Pvalb.2_7	15059	0.0071587	0.019649	0.0068933	0.14953	1	1
DropViz_FC_level2	NeuronSlc17a7-Slc17a6_Syt6-Nnat.3_8	15059	0.0057587	0.015922	0.008073	0.23783	1	1
DropViz_FC_level2	Neuron_Gad1Gad2_Pvalb-Unc5b.2_6	15059	0.003408	0.0097968	0.0051821	0.25538	1	1
DropViz_FC_level2	Neuron_Gad1Gad2-Slc17a8_Synpr-Sncg-Yjefn3.1_10	15059	0.0040866	0.011323	0.0064155	0.26207	1	1
DropViz_FC_level2	Neuron_Gad1Gad2_Sst-Calb2.2_3	15059	0.001379	0.0038894	0.0060629	0.41004	1	1
DropViz_FC_level2	Neuron_Gad1Gad2-Th_Nr4a2.2_10	15059	-0.0002865	-0.0008001	0.0059917	0.51907	1	1
DropViz_FC_level2	Neuron_Slc17a7_Nptxr-Drd1.6_6	15059	-0.0003579	-0.0011196	0.0023659	0.56012	1	1
DropViz_FC_level2	Neuron_Gad1Gad2_Pvalb-Nefm.2_8	15059	-0.0017637	-0.004834	0.0063273	0.60978	1	1
DropViz_FC_level2	Neuron_Gad1Gad2_Sst-Chodl.2_1	15059	-0.0017061	-0.0048553	0.0049751	0.63417	1	1
DropViz_FC_level2	Endothelial_Tip_Dcn_Col15a1.14_4	15059	-0.0032447	-0.0089226	0.0041061	0.78529	1	1
DropViz_FC_level2	Polydendrocyte_Tnr_Dlx1.10_2	15059	-0.0031113	-0.0089053	0.0038157	0.79257	1	1
DropViz_FC_level2	Microglia_C1qb_Tmem119-Fos.11_4	15059	-0.0024429	-0.0077203	0.0023138	0.85446	1	1
DropViz_FC_level2	Oligodendrocyte_Tnf_Igsf8-Ctps.9_2	15059	-0.0043882	-0.012119	0.0039919	0.86417	1	1
DropViz_FC_level2	Mural_Rgs5Acta2_Abcc9.13_3	15059	-0.0044261	-0.01256	0.0038016	0.87784	1	1
DropViz_FC_level2	Endothelial_Tip_Dcn_Coch.14_3	15059	-0.0037977	-0.010987	0.0032391	0.87948	1	1
DropViz_FC_level2	Polydendrocyte_Tnr_Opalin.10_4	15059	-0.004733	-0.013446	0.0036343	0.90358	1	1
DropViz_FC_level2	Endothelial_Tip_Dcn_Inmt.14_5	15059	-0.0037055	-0.011443	0.0026269	0.92081	1	1
DropViz_FC_level2	Astrocyte_Gja1_Myoc.8_2	15059	-0.0070195	-0.018267	0.0048428	0.92639	1	1
DropViz_FC_level2	Astrocyte_Gja1.8_1	15059	-0.0074115	-0.019189	0.0050705	0.92808	1	1
DropViz_FC_level2	Polydendrocyte_Tnr_Cspg5.10_1	15059	-0.0086989	-0.023793	0.0054259	0.94555	1	1
DropViz_FC_level2	Oligodendrocyte_Tnf_Igsf8.9_1	15059	-0.0079696	-0.020988	0.0048453	0.94998	1	1
DropViz_FC_level2	Neuron_Slc17a6_Reln.11_2	15059	-0.0049906	-0.015913	0.0029003	0.95734	1	1
DropViz_FC_level2	Mural_Rgs5Acta2_Col3a1.13_4	15059	-0.0053197	-0.01571	0.0030831	0.95776	1	1
DropViz_FC_level2	Endothelial_Stalk_Flt1_Car4.12_3	15059	-0.0074533	-0.019967	0.0042753	0.95935	1	1
DropViz_FC_level2	Endothelial_Stalk_Flt1_Cfh.12_4	15059	-0.0073331	-0.019746	0.0041014	0.9631	1	1
DropViz_FC_level2	Polydendrocyte_Tnr_Pdgfa.10_3	15059	-0.0081843	-0.022783	0.0043587	0.96978	1	1
DropViz_FC_level2	Mural_Rgs5Acta2_Ccnd1.13_2	15059	-0.0078258	-0.021002	0.0041116	0.97149	1	1
DropViz_FC_level2	Oligodendrocyte_Tnf_Kif5b.9_3	15059	-0.0098733	-0.026085	0.0050021	0.97579	1	1
DropViz_FC_level2	Oligodendrocyte_Tnf_Ptgds.9_4	15059	-0.01072	-0.028018	0.0052801	0.97882	1	1
DropViz_FC_level2	Endothelial_Stalk_Flt1_Gkn3.12_1	15059	-0.0086674	-0.023104	0.0042287	0.97979	1	1
DropViz_FC_level2	Mural_Rgs5Acta2_Cnn1.13_1	15059	-0.0095577	-0.02554	0.0040596	0.99071	1	1
DropViz_FC_level2	Microglia_C1qb_Tmem119.11_1	15059	-0.011257	-0.029665	0.0047459	0.99115	1	1
DropViz_FC_level2	Endothelial_Stalk_Flt1_Mgp.12_2	15059	-0.0081198	-0.023106	0.0033107	0.9929	1	1
DropViz_FC_level2	Endothelial_Tip_Dcn_Dapl1.14_2	15059	-0.0085474	-0.024124	0.0034687	0.99313	1	1
DropViz_FC_level2	Endothelial_Tip_Dcn_1500015O10Rik.14_1	15059	-0.0089802	-0.025332	0.0036318	0.99329	1	1
DropViz_FC_level2	Polydendrocyte_Tnr_Bmp4-Gpr17.10_6	15059	-0.011437	-0.032463	0.0045856	0.99368	1	1
DropViz_FC_level2	Oligodendrocyte_Tnf_Klk6.9_5	15059	-0.012313	-0.032781	0.0048367	0.99454	1	1
DropViz_FC_level2	Polydendrocyte_Tnr_Bmp4-_Ptgds.10_5	15059	-0.013243	-0.036901	0.0046047	0.99798	1	1
DropViz_FC_level2	Macrophage_C1qb_Mrc1.11_3	15059	-0.010027	-0.028073	0.0034466	0.99819	1	1
DropViz_FC_level2	Endothelial_Stalk_Flt1_Lrg1.12_5	15059	-0.0092987	-0.028039	0.0028658	0.99941	1	1

## Sheet: Table S6
Supplementary Table S6. Results from cell type specificity analysis in the human cortex
Dataset	Cell_type	NGENES	BETA	BETA_STD	SE	P	P.adj.pds	P.adj
GSE67835_Human_Cortex_woFetal	neurons	17038	0.019905	0.03795	0.0072435	0.0030021	0.0210147	0.0210147
GSE67835_Human_Cortex_woFetal	hybrid	17038	0.015314	0.028835	0.010071	0.064182	0.449274	0.449274
GSE67835_Human_Cortex_woFetal	oligodendrocytes	17038	0.0041058	0.0069808	0.0074963	0.29195	1	1
GSE67835_Human_Cortex_woFetal	OPC	17038	-0.0033299	-0.0054009	0.0078689	0.66391	1	1
GSE67835_Human_Cortex_woFetal	astrocytes	17038	-0.0037837	-0.0063212	0.0070139	0.70521	1	1
GSE67835_Human_Cortex_woFetal	endothelial	17038	-0.0055477	-0.0082571	0.0072734	0.77718	1	1
GSE67835_Human_Cortex_woFetal	microglia	17038	-0.016093	-0.020219	0.0068982	0.99017	1	1

## Sheet: Table S7
Supplementary Table S7. Results from positional mapping
ensg	symbol	chr	start	end	strand	type	entrezID	HUGO	pLI	ncRVIS	posMapSNPs	posMapMaxCADD	minGwasP	IndSigSNPs	GenomicLocus
ENSG00000173406	DAB1	1	57460451	59012406	-1	protein_coding	1600	DAB1	0.981409	-0.32808	43	12.52	3.77e-09	rs12405761	1
ENSG00000227935	RP6-102O10.1	1	57852248	57853122	1	lincRNA	NA	NA	NA	NA	12	8.969	3.77e-09	rs12405761	1
ENSG00000172260	NEGR1	1	71861623	72748417	-1	protein_coding	257194	NEGR1	0.951349	-1.71358	86	17.04	5.14e-12	rs2126077;rs2815757;rs2815752	2
ENSG00000233994	GDI2P2	1	72740235	72740842	1	pseudogene	100420259	GDI2P2	NA	NA	6	17.04	7.68e-11	rs2126077;rs2815757	2
ENSG00000227207	RPL31P12	1	72767155	72767512	1	pseudogene	100270887	RPL31P12	NA	NA	21	7.721	3.64e-12	rs2815752;rs2815757	2
ENSG00000225087	RP4-660H19.1	1	73214604	73364823	-1	lincRNA	NA	NA	NA	NA	4	6.913	3.14e-05	rs35641559	3
ENSG00000229636	KRT8P21	1	73570475	73571965	1	pseudogene	126811	KRT8P21	NA	NA	12	12.92	5.28e-07	rs35641559	3
ENSG00000251825	RN7SKP19	1	73657287	73657538	-1	misc_RNA	106479103	RN7SKP19	NA	NA	25	15.73	1.08e-07	rs35641559	3
ENSG00000233973	RP4-598G3.1	1	73771853	73820934	1	lincRNA	101927295	LINC01360	NA	NA	110	14.76	2.73e-08	rs35641559;rs4593766	3
ENSG00000134369	NAV1	1	201592411	201796102	1	protein_coding	89796	NAV1	1	-1.02397	38	15.09	1.28e-10	rs11577900;rs7551784;rs2494112;rs2279681;rs2644109	5
ENSG00000231871	IPO9-AS1	1	201657387	201798687	-1	antisense	100873949	IPO9-AS1	NA	NA	43	15.09	1.28e-10	rs11577900;rs7551784;rs2494112;rs2279681;rs2644109	5
ENSG00000221028	MIR1231	1	201777739	201777830	1	miRNA	100302158	MIR1231	NA	NA	10	6.706	1.44e-10	rs2494112;rs7551784;rs2279681	5
ENSG00000198700	IPO9	1	201798269	201853422	1	protein_coding	55705	IPO9	0.999992	3.33395	55	22.1	7.38e-10	rs11577900;rs2279681;rs2494112;rs2644109	5
ENSG00000198892	SHISA4	1	201857808	201861434	1	protein_coding	149345	SHISA4	0.00107148	0.256183	17	22.1	2.1e-09	rs11577900;rs2279681;rs2644109;rs2494112	5
ENSG00000223774	RP11-307B6.3	1	201862970	201869106	1	antisense	NA	NA	NA	NA	19	22.1	2.1e-09	rs2279681;rs2644109;rs11577900;rs2494112	5
ENSG00000163431	LMOD1	1	201865580	201915715	-1	protein_coding	25802	LMOD1	0.790873	-0.0854091	39	22.1	1.57e-09	rs2644109;rs11577900;rs2279681;rs2494112	5
ENSG00000228033	AC010967.2	2	52949815	53137158	-1	lincRNA	NA	NA	NA	NA	34	7.821	1.46e-08	rs11125445;rs17043773	7
ENSG00000232604	AC010967.3	2	53091373	53093769	1	lincRNA	NA	NA	NA	NA	4	1.823	8.28e-07	rs17043773;rs11125445	7
ENSG00000232668	AC010967.1	2	53110381	53110593	1	pseudogene	NA	NA	NA	NA	2	1.823	4.81e-07	rs11125445	7
ENSG00000233723	LINC01122	2	58654934	59290901	1	lincRNA	400955	LINC01122	NA	NA	169	21	2.1e-13	rs112011984;rs6545695;rs6724384;rs17049689;rs1861410	8
ENSG00000143995	MEIS1	2	66660584	66801001	1	protein_coding	4211	MEIS1	0.990885	-1.50087	11	17.6	1.64e-22	rs62144053;rs113851554;rs182588061;rs6735071	9
ENSG00000232046	AC007392.3	2	66801162	66957289	1	lincRNA	100507073	LINC01798	NA	NA	4	9.556	1.3e-15	rs6735071;rs113851554;rs60751869	9
ENSG00000235774	AC023347.1	2	127066087	127101569	1	lincRNA	NA	NA	NA	NA	39	7.134	7.8e-08	rs360241	11
ENSG00000236655	AC023347.2	2	127069043	127069504	-1	pseudogene	NA	NA	NA	NA	6	4.713	2.24e-07	rs360241	11
ENSG00000151690	MFSD6	2	191273081	191373931	1	protein_coding	54842	MFSD6	0.00184669	-0.109789	10	7.459	3.36e-09	rs4577309	12
ENSG00000272979	RP11-647K16.1	2	191318818	191319247	-1	antisense	NA	NA	NA	NA	2	1.355	0.03328	rs4577309	12
ENSG00000189362	TMEM194B	2	191369068	191399448	-1	protein_coding	100131211	TMEM194B	NA	-0.209502	7	8.453	1.55e-07	rs4577309	12
ENSG00000233654	AC093388.3	2	191399581	191432828	1	antisense	NA	NA	NA	NA	4	5.326	2.19e-07	rs4577309	12
ENSG00000118263	KLF7	2	207938861	208031991	-1	protein_coding	8609	KLF7	0.929931	-2.11539	15	14.51	3.04e-08	rs58942037	13
ENSG00000224342	AC007879.1	2	208038358	208087514	1	lincRNA	NA	NA	NA	NA	37	17.76	3.3e-08	rs58942037	13
ENSG00000234902	AC007879.2	2	208051441	208100790	-1	lincRNA	NA	NA	NA	NA	30	17.76	1.06e-07	rs58942037	13
ENSG00000225916	AC007879.4	2	208091673	208093032	1	lincRNA	NA	NA	NA	NA	2	11.48	7.22e-07	rs58942037	13
ENSG00000197585	AC107218.3	2	215114764	215548970	-1	antisense	NA	NA	NA	NA	143	16.52	2.26e-08	rs137959292	14
ENSG00000174453	VWC2L	2	215275789	215443683	1	protein_coding	402117	VWC2L	0.612118	-1.05683	15	12.51	3.02e-07	rs137959292	14
ENSG00000213672	NCKIPSD	3	48701364	48723797	-1	protein_coding	51517	NCKIPSD	0.00713136	-0.551018	1	4.222	0.002491	rs10865954	15
ENSG00000068745	IP6K2	3	48725436	48777786	-1	protein_coding	51447	IP6K2	0.989458	-0.392799	8	6.646	0.0001239	rs10865954	15
ENSG00000114302	PRKAR2A	3	48782030	48885279	-1	protein_coding	5576	PRKAR2A	0.983251	-2.8684	27	11.45	6.44e-05	rs10865954	15
ENSG00000224424	PRKAR2A-AS1	3	48885005	48889414	1	antisense	100506637	PRKAR2A-AS1	NA	NA	7	8.406	9e-05	rs10865954	15
ENSG00000178537	SLC25A20	3	48894369	48936426	-1	protein_coding	788	SLC25A20	2.05e-07	-0.773546	12	11.26	6.57e-05	rs10865954	15
ENSG00000221883	ARIH2OS	3	48955221	48956818	-1	protein_coding	646450	ARIH2OS	0.437613	-0.628346	7	11.63	7.81e-05	rs10865954	15
ENSG00000177479	ARIH2	3	48956254	49023815	1	protein_coding	10425	ARIH2	0.987412	-1.69992	22	11.63	5.79e-05	rs10865954	15
ENSG00000235236	RP13-131K19.1	3	49017351	49021418	-1	antisense	NA	NA	NA	NA	5	5.847	7e-05	rs10865954	15
ENSG00000223343	RP13-131K19.2	3	49022482	49027421	-1	antisense	NA	NA	NA	NA	4	5.847	7e-05	rs10865954	15
ENSG00000273211	RP13-131K19.7	3	49022918	49023396	-1	lincRNA	NA	NA	NA	NA	4	5.847	7e-05	rs10865954	15
ENSG00000178467	P4HTM	3	49027319	49044587	1	protein_coding	54681	P4HTM	0.0232749	NA	3	5.847	7.91e-05	rs10865954	15
ENSG00000178252	WDR6	3	49044495	49053386	1	protein_coding	11180	WDR6	9.2e-07	-0.0589495	1	0.921	0.0001514	rs10865954	15
ENSG00000178149	DALRD3	3	49052921	49059726	-1	protein_coding	55152	DALRD3	1.85e-05	0.0723068	1	0.921	0.0001514	rs10865954	15
ENSG00000178035	IMPDH2	3	49061758	49066841	-1	protein_coding	3615	IMPDH2	0.00135317	-0.509343	3	2.733	9.63e-05	rs10865954	15
ENSG00000272434	RP13-131K19.6	3	49066749	49067139	1	antisense	NA	NA	NA	NA	3	2.733	9.63e-05	rs10865954	15
ENSG00000198218	QRICH1	3	49067140	49131796	-1	protein_coding	54870	QRICH1	0.99607	-0.279294	15	4.701	5.44e-05	rs10865954	15
ENSG00000241461	RN7SL182P	3	49120666	49120963	1	misc_RNA	106479287	RN7SL182P	NA	NA	1	0.557	NA	rs10865954	15
ENSG00000172053	QARS	3	49133365	49142553	-1	protein_coding	5859	QARS	8.79e-08	-0.634756	8	3.357	4.9e-06	rs10865954;rs7617480	15
ENSG00000172046	USP19	3	49145479	49158371	-1	protein_coding	10869	USP19	0.999992	-0.429633	6	21.3	4.59e-06	rs10865954;rs7617480	15
ENSG00000172037	LAMB2	3	49158547	49170551	-1	protein_coding	3913	LAMB2	7.45e-11	-0.451082	4	21.3	4.59e-06	rs7617480;rs10865954	15
ENSG00000270441	RP11-694I15.7	3	49177519	49198284	-1	pseudogene	NA	NA	NA	NA	13	9.022	2.63e-10	rs10865954;rs7617480	15
ENSG00000177352	CCDC71	3	49199968	49203754	-1	protein_coding	64925	CCDC71	0.0169896	NA	8	15.13	1.28e-11	rs10865954;rs7617480	15
ENSG00000185909	KLHDC8B	3	49209044	49213917	1	protein_coding	200942	KLHDC8B	0.0104214	-0.0773522	9	15.13	1.28e-11	rs10865954;rs7617480	15
ENSG00000236980	C3orf84	3	49215065	49229291	-1	protein_coding	646498	C3orf84	0.00022129	0.0590497	15	15.24	1.28e-11	rs10865954;rs7617480	15
ENSG00000173421	CCDC36	3	49235861	49295537	1	protein_coding	339834	CCDC36	0.509349	-0.452713	26	15.24	5.71e-11	rs7617480;rs10865954	15
ENSG00000270538	RP11-3B7.7	3	49289562	49289697	-1	pseudogene	NA	NA	NA	NA	6	11.88	1.68e-10	rs7617480;rs10865954	15
ENSG00000225399	RP11-3B7.1	3	49297518	49298744	1	protein_coding	NA	NA	NA	NA	6	11.88	1.68e-10	rs10865954;rs7617480	15
ENSG00000188315	C3orf62	3	49306035	49315342	-1	protein_coding	375341	C3orf62	0.00712466	-1.95031	6	11.88	2.36e-07	rs7617480;rs10865954	15
ENSG00000199546	Y_RNA	3	49307565	49307672	1	misc_RNA	NA	NA	NA	NA	4	11.88	2.36e-07	rs7617480;rs10865954	15
ENSG00000264633	MIR4271	3	49311553	49311619	1	miRNA	100422952	MIR4271	NA	NA	4	6.638	2.36e-07	rs10865954;rs7617480	15
ENSG00000114316	USP4	3	49315264	49378145	-1	protein_coding	7375	USP4	6.2e-07	NA	15	6.638	2.36e-07	rs7617480	15
ENSG00000233276	GPX1	3	49394609	49396033	-1	protein_coding	2876	GPX1	0.00693165	-0.616399	10	13.18	3.61e-06	rs7617480;rs2029591	15
ENSG00000067560	RHOA	3	49396578	49450431	-1	protein_coding	387	RHOA	0.804698	-0.430263	33	13.67	1.14e-06	rs7617480;rs2029591	15
ENSG00000235908	RHOA-IT1	3	49402578	49404439	-1	sense_intronic	106480739	RHOA-IT1	NA	NA	11	13.18	2.99e-06	rs7617480;rs2029591	15
ENSG00000145022	TCTA	3	49449639	49453908	1	protein_coding	6988	TCTA	0.0132648	-0.595941	9	13.67	1.14e-06	rs7617480	15
ENSG00000145020	AMT	3	49454211	49460186	-1	protein_coding	275	AMT	0.00056948	-0.0226371	9	8.227	1.65e-06	rs7617480	15
ENSG00000235261	NICN1-AS1	3	49460379	49461864	1	antisense	NA	NICN1-AS1	NA	NA	8	8.227	1.65e-06	rs7617480	15
ENSG00000145029	NICN1	3	49460379	49466759	-1	protein_coding	84276	NICN1	0.257246	-1.08729	9	8.227	1.65e-06	rs7617480	15
ENSG00000201301	RNA5SP130	3	49504548	49504661	-1	rRNA	106478995	RNA5SP130	NA	NA	6	4.981	2.15e-06	rs7617480	15
ENSG00000173402	DAG1	3	49506146	49573048	1	protein_coding	1605	DAG1	0.940922	-0.838742	30	13.88	1.76e-06	rs7617480;rs10865954	15
ENSG00000226913	BSN-AS2	3	49586739	49591799	-1	lincRNA	100132677	BSN-AS2	NA	NA	10	13.05	1.76e-06	rs7617480	15
ENSG00000164061	BSN	3	49591922	49708978	1	protein_coding	8927	BSN	1	-1.28511	36	13.05	2.9e-10	rs7617480;rs2029591	15
ENSG00000235120	BSN-AS1	3	49677916	49679202	-1	antisense	106478963	BSN-AS1	NA	NA	6	9.883	5.62e-09	rs2029591	15
ENSG00000164062	APEH	3	49711435	49721396	1	protein_coding	327	APEH	0.0132157	-0.271805	2	13.52	8.03e-09	rs2029591	15
ENSG00000173531	MST1	3	49721380	49726934	-1	protein_coding	4485	MST1	1.73e-10	0.158165	1	13.52	8.03e-09	rs2029591	15
ENSG00000259970	AC099668.5	3	49721913	49722416	-1	processed_transcript	NA	NA	NA	NA	1	13.52	8.03e-09	rs2029591	15
ENSG00000164068	RNF123	3	49726932	49758962	1	protein_coding	63891	RNF123	0.969715	-0.461991	13	22.4	3.72e-09	rs2029591;rs6446187	15
ENSG00000176020	AMIGO3	3	49754267	49761349	-1	protein_coding	386724	AMIGO3	7.51e-06	NA	13	22.4	3.72e-09	rs6446187;rs2029591	15
ENSG00000173540	GMPPB	3	49754277	49761384	-1	protein_coding	29925	GMPPB	8.25e-05	-0.659554	13	22.4	3.72e-09	rs6446187;rs2029591	15
ENSG00000176095	IP6K1	3	49761727	49823975	-1	protein_coding	9807	IP6K1	0.23518	-2.10343	53	22.4	1.37e-09	rs2029591;rs6446187;rs4688760	15
ENSG00000239576	COX6CP14	3	49795916	49796089	1	pseudogene	106481683	COX6CP14	NA	NA	20	17.96	1.37e-09	rs6446187;rs2029591	15
ENSG00000244730	RP13-1056D16.2	3	49812718	49813047	1	pseudogene	NA	NA	NA	NA	13	9.719	3.85e-09	rs2029591;rs6446187	15
ENSG00000187492	CDHR4	3	49828165	49837268	-1	protein_coding	389118	CDHR4	0.013474	0.0436097	9	18.12	3.96e-09	rs6446187;rs2029591	15
ENSG00000185614	FAM212A	3	49840687	49842463	1	protein_coding	389119	FAM212A	0.00058916	NA	6	18.12	3.96e-09	rs2029591;rs6446187	15
ENSG00000182179	UBA7	3	49842640	49851379	-1	protein_coding	7318	UBA7	2.68e-14	-0.315381	9	18.12	3.6e-09	rs2029591;rs6446187;rs4688760	15
ENSG00000263506	MIR5193	3	49843570	49843678	-1	miRNA	100847079	MIR5193	NA	NA	7	18.12	3.96e-09	rs2029591;rs6446187	15
ENSG00000263651	AC139451.1	3	49856387	49856486	-1	miRNA	NA	NA	NA	NA	10	14.84	3.6e-09	rs2029591;rs6446187;rs4688760	15
ENSG00000183763	TRAIP	3	49866034	49894007	-1	protein_coding	10293	TRAIP	0.125104	-0.132255	23	17.61	1.62e-10	rs4688760;rs6446187;rs2029591	15
ENSG00000164076	CAMKV	3	49895421	49907655	-1	protein_coding	79012	CAMKV	0.996846	-0.638323	18	18.51	6.26e-11	rs2029591;rs6446187;rs3774750	15
ENSG00000264706	RN7SL217P	3	49900819	49901093	-1	misc_RNA	106479301	RN7SL217P	NA	NA	7	17.61	6.26e-11	rs2029591;rs6446187	15
ENSG00000234667	ACTBP13	3	49910780	49915413	-1	pseudogene	389120	ACTBP13	NA	NA	9	18.51	6.26e-11	rs6446187;rs3774750	15
ENSG00000164078	MST1R	3	49924435	49941299	-1	protein_coding	4486	MST1R	1.69e-20	-0.377645	16	18.51	3.38e-10	rs6446187;rs3774750	15
ENSG00000230698	CTD-2330K9.2	3	49936735	49941190	1	antisense	NA	NA	NA	NA	10	11.37	3.38e-10	rs6446187	15
ENSG00000228008	CTD-2330K9.3	3	49941278	49954370	1	protein_coding	NA	NA	NA	NA	16	13.15	3.38e-10	rs6446187	15
ENSG00000164077	MON1A	3	49946302	49967606	-1	protein_coding	84315	MON1A	0.00636811	-0.629673	21	13.15	3.38e-10	rs6446187;rs3774750	15
ENSG00000004534	RBM6	3	49977440	50137478	1	protein_coding	10180	RBM6	1	-0.685653	96	17.77	2.5e-10	rs6446187;rs3774750;rs4688760	15
ENSG00000003756	RBM5	3	50126341	50156454	1	protein_coding	10181	RBM5	0.999999	-0.605889	20	17.77	1.3e-09	rs6446187;rs3774750	15
ENSG00000235016	RP11-493K19.3	3	50153455	50193518	-1	antisense	100129060	SEMA3F-AS1	NA	NA	16	18.58	1.78e-09	rs6446187;rs3774750;rs4688760	15
ENSG00000001617	SEMA3F	3	50192478	50226508	1	protein_coding	6405	SEMA3F	0.999918	NA	11	15.54	9.51e-09	rs3774750	15
ENSG00000207922	MIR566	3	50210759	50210852	1	miRNA	NA	MIR566	NA	NA	7	14.19	9.51e-09	rs3774750	15
ENSG00000114349	GNAT1	3	50229045	50233949	1	protein_coding	2779	GNAT1	2.51e-06	-0.274733	2	5.173	0.0008056	rs3774750	15
ENSG00000188338	SLC38A3	3	50242679	50258411	1	processed_transcript	10991	SLC38A3	NA	NA	2	5.173	0.0009442	rs3774750	15
ENSG00000185565	LSAMP	3	115521235	117716095	-1	protein_coding	4045	LSAMP	0.946284	NA	43	20.7	4.7e-08	rs9861346	16
ENSG00000239268	RP11-384F7.2	3	117391001	117716439	-1	lincRNA	NA	NA	NA	NA	44	20.7	4.7e-08	rs9861346	16
ENSG00000242816	RP11-768G7.3	3	117509520	117512612	1	lincRNA	NA	NA	NA	NA	4	20.7	4.7e-08	rs9861346	16
ENSG00000243276	RP11-384F7.1	3	117723666	118276515	-1	lincRNA	NA	NA	NA	NA	9	14.54	4.88e-07	rs9861346	16
ENSG00000181744	C3orf58	3	143690640	143767561	1	protein_coding	205428	C3orf58	0.162504	-0.239967	11	7.99	4.01e-07	rs6765491	17
ENSG00000164180	TMEM161B	5	87485450	87565293	-1	protein_coding	153396	TMEM161B	0.003685	0.0123156	3	3.115	1.02e-08	rs247909	18
ENSG00000197071	AC010243.1	5	87514708	87515080	1	pseudogene	NA	NA	NA	NA	2	3.115	2.82e-08	rs247909	18
ENSG00000247828	TMEM161B-AS1	5	87564712	87732502	1	antisense	100505894	TMEM161B-AS1	NA	NA	24	14.18	8.76e-09	rs247909	18
ENSG00000240083	RPS3AP22	5	87677774	87678542	1	pseudogene	100130786	RPS3AP22	NA	NA	6	14.18	1.55e-08	rs247909	18
ENSG00000206958	SNORA70	5	87678589	87678724	1	snoRNA	26778	SNORA70	NA	NA	6	14.18	1.55e-08	rs247909	18
ENSG00000250306	CTC-498M16.3	5	87678765	87679077	1	pseudogene	NA	NA	NA	NA	6	14.18	1.55e-08	rs247909	18
ENSG00000250156	CTC-498M16.2	5	87704799	87734907	-1	lincRNA	102546226	LINC02060	NA	NA	5	3.142	1.81e-07	rs247909	18
ENSG00000271904	CTC-498M16.4	5	87729709	87794514	-1	lincRNA	NA	NA	NA	NA	15	15.04	1.22e-07	rs247909	18
ENSG00000245526	LINC00461	5	87803363	87986858	-1	lincRNA	645323	LINC00461	NA	NA	5	17.23	1.36e-08	rs247909;rs27732	18
ENSG00000245864	CTC-467M3.1	5	87972036	88018648	1	antisense	109729137	MEF2C-AS2	NA	NA	18	18.12	1.36e-08	rs27732	18
ENSG00000250377	CTC-467M3.3	5	87988462	87989789	-1	lincRNA	NA	NA	NA	NA	4	4.754	1.36e-08	rs27732	18
ENSG00000250555	CTC-467M3.2	5	87988468	87988676	1	antisense	NA	NA	NA	NA	4	4.754	1.36e-08	rs27732	18
ENSG00000081189	MEF2C	5	88013975	88199922	-1	protein_coding	4208	MEF2C	0.00424617	-2.66223	33	18.12	5.51e-08	rs27732	18
ENSG00000250049	RP11-348J24.2	5	91378414	91815133	1	lincRNA	NA	NA	NA	NA	73	13.95	7.73e-09	rs12187247	19
ENSG00000248864	RP11-348J24.1	5	91625047	91628401	1	lincRNA	NA	NA	NA	NA	6	13.95	6.12e-08	rs12187247	19
ENSG00000264489	AC120120.1	5	91741653	91741744	-1	miRNA	NA	NA	NA	NA	3	2.695	2.93e-07	rs12187247	19
ENSG00000249776	RP11-133F8.2	5	91745963	91996570	-1	lincRNA	NA	NA	NA	NA	10	6.954	1.48e-07	rs12187247	19
ENSG00000251026	RP11-138J23.1	5	103415612	103441104	1	lincRNA	NA	NA	NA	NA	2	1.121	NA	rs1976423	20
ENSG00000251574	RP11-6N13.1	5	103718999	104728671	-1	lincRNA	NA	NA	NA	NA	316	18.79	3.77e-19	rs12658032;rs55649128;rs349586;rs1976423;rs1363103;rs10042031;rs396755;rs67597604	20
ENSG00000253776	RP11-6N13.4	5	104109342	104135473	1	lincRNA	NA	NA	NA	NA	1	8.346	NA	rs1976423	20
ENSG00000252881	RNU6-334P	5	104115989	104116090	-1	snRNA	106479714	RNU6-334P	NA	NA	1	8.346	NA	rs1976423	20
ENSG00000253584	CTD-2374C24.1	5	104253193	104582065	-1	lincRNA	NA	NA	NA	NA	25	18.79	NA	rs1976423	20
ENSG00000232159	RAB9BP1	5	104435174	104435799	1	pseudogene	9366	RAB9BP1	NA	NA	2	13.45	NA	rs1976423	20
ENSG00000252399	RNU6-1259P	6	26353199	26353264	-1	snRNA	NA	RNU6-1259P	NA	NA	25	9.653	3.33e-05	rs71557335	21
ENSG00000186470	BTN3A2	6	26365387	26378546	1	protein_coding	11118	BTN3A2	0.00012452	2.20791	75	9.653	2.96e-08	rs71557335	21
ENSG00000215979	AL021917.1	6	26365704	26365780	-1	miRNA	NA	NA	NA	NA	62	9.653	2.96e-08	rs71557335	21
ENSG00000124508	BTN2A2	6	26383324	26395102	1	protein_coding	10385	BTN2A2	0.00015029	1.01572	25	8.783	3.07e-05	rs71557335	21
ENSG00000026950	BTN3A1	6	26402465	26415444	1	protein_coding	11119	BTN3A1	8.65e-07	1.62791	7	6.448	1.01e-05	rs71557335	21
ENSG00000124549	BTN2A3P	6	26421619	26432611	1	pseudogene	54718	BTN2A3P	NA	NA	8	6.279	1.01e-05	rs71557335	21
ENSG00000111801	BTN3A3	6	26440700	26453643	1	protein_coding	10384	BTN3A3	7.19e-10	1.09011	11	5.741	2.9e-05	rs71557335	21
ENSG00000112763	BTN2A1	6	26458150	26476849	1	protein_coding	11120	BTN2A1	1.07e-18	0.260571	12	22.5	2.35e-05	rs71557335	21
ENSG00000124557	BTN1A1	6	26501449	26510650	1	protein_coding	696	BTN1A1	1.14e-09	-0.329705	8	9.839	3.61e-05	rs71557335	21
ENSG00000199289	RNU6-502P	6	26519579	26519686	-1	snRNA	106481899	RNU6-502P	NA	NA	4	7.075	3.61e-05	rs71557335	21
ENSG00000228223	HCG11	6	26522076	26526807	1	lincRNA	493812	HCG11	NA	NA	4	7.526	3.97e-05	rs71557335	21
ENSG00000261353	CTA-14H9.5	6	26527291	26527632	1	lincRNA	NA	NA	NA	NA	3	7.526	3.97e-05	rs71557335	21
ENSG00000182952	HMGN4	6	26538633	26546482	1	protein_coding	10473	HMGN4	0.557082	-0.351003	7	7.526	3.74e-05	rs71557335	21
ENSG00000146109	ABT1	6	26597180	26600278	1	protein_coding	29777	ABT1	0.0271056	0.104221	18	13.55	2.94e-05	rs71557335	21
ENSG00000271071	RP11-457M11.6	6	26612131	26613337	-1	pseudogene	NA	NA	NA	NA	7	4.725	2.94e-05	rs71557335	21
ENSG00000181315	ZNF322	6	26636518	26659980	-1	protein_coding	79692	ZNF322	NA	-1.14047	1	4.384	NA	rs71557335	21
ENSG00000241549	GUSBP2	6	26839263	26924333	-1	pseudogene	387036	GUSBP2	NA	NA	7	3.672	2.79e-05	rs71557335	21
ENSG00000243307	RP11-239L20.3	6	26864731	26866556	1	pseudogene	NA	NA	NA	NA	1	0.966	0.002319	rs71557335	21
ENSG00000216915	RP1-97D16.1	6	27704779	27706273	-1	pseudogene	NA	NA	NA	NA	6	15.29	2.45e-05	rs4713177	22
ENSG00000218069	RSL24D1P1	6	27748398	27748890	-1	pseudogene	100129755	RSL24D1P1	NA	NA	1	10.37	2.79e-05	rs4713177	22
ENSG00000217862	HIST1H4PS1	6	27774853	27775117	1	pseudogene	10337	HIST1H4PS1	NA	NA	16	16.23	2.31e-05	rs4713177	22
ENSG00000185130	HIST1H2BL	6	27775257	27775709	-1	protein_coding	8340	HIST1H2BL	0.00286755	-0.030111	16	16.23	2.31e-05	rs4713177	22
ENSG00000196747	HIST1H2AI	6	27775899	27776429	1	protein_coding	8329	HIST1H2AI	0.581587	-0.0583265	16	16.23	2.31e-05	rs4713177	22
ENSG00000203813	HIST1H3H	6	27777842	27778314	1	protein_coding	8357	HIST1H3H	0.0249392	-0.177817	15	16.23	2.31e-05	rs4713177	22
ENSG00000182611	HIST1H2AJ	6	27782112	27782607	-1	protein_coding	8331	HIST1H2AJ	0.191198	0.615054	16	16.23	2.31e-05	rs4713177	22
ENSG00000196374	HIST1H2BM	6	27782822	27783267	1	protein_coding	8342	HIST1H2BM	0.00275346	-0.27562	17	16.23	2.01e-05	rs4713177	22
ENSG00000197238	HIST1H4J	6	27791884	27792257	1	protein_coding	8363	HIST1H4J	0.423754	0.59845	18	9.571	5.01e-07	rs4713177	22
ENSG00000197914	HIST1H4K	6	27798952	27799305	-1	protein_coding	8362	HIST1H4K	0.429119	0.387416	14	12.22	5.01e-07	rs4713177	22
ENSG00000184348	HIST1H2AK	6	27805658	27806117	-1	protein_coding	8330	HIST1H2AK	0.0684285	-0.0412441	15	12.22	2.28e-05	rs4713177	22
ENSG00000233822	HIST1H2BN	6	27806323	27823487	1	protein_coding	8341	HIST1H2BN	0.139775	0.145508	21	15.9	1.93e-05	rs4713177	22
ENSG00000217646	HIST1H2BPS2	6	27831840	27832179	-1	pseudogene	10340	HIST1H2BPS2	NA	NA	15	15.9	1.44e-05	rs4713177	22
ENSG00000198374	HIST1H2AL	6	27833034	27833606	1	protein_coding	8332	HIST1H2AL	0.0624869	-0.360341	15	15.9	1.44e-05	rs4713177	22
ENSG00000184357	HIST1H1B	6	27834570	27835359	-1	protein_coding	3009	HIST1H1B	0.509139	-0.0898951	16	15.9	1.44e-05	rs4713177	22
ENSG00000182572	HIST1H3I	6	27839623	27840099	-1	protein_coding	8354	HIST1H3I	0.36088	-0.232438	16	15.9	1.44e-05	rs4713177	22
ENSG00000198558	HIST1H4L	6	27840926	27841289	-1	protein_coding	8368	HIST1H4L	0.191235	0.42689	16	15.9	1.44e-05	rs4713177	22
ENSG00000197153	HIST1H3J	6	27858093	27860884	-1	protein_coding	8356	HIST1H3J	0.695884	-0.189708	4	10.73	2.1e-05	rs4713177	22
ENSG00000233224	HIST1H2AM	6	27860477	27860963	-1	protein_coding	8336	HIST1H2AM	0.00085648	-0.225135	4	10.73	2.1e-05	rs4713177	22
ENSG00000196331	HIST1H2BO	6	27861203	27861669	1	protein_coding	8348	HIST1H2BO	3.07e-05	-0.223062	3	5.694	2.1e-05	rs4713177	22
ENSG00000238610	RNU7-26P	6	27865282	27865344	-1	snRNA	100147813	RNU7-26P	NA	NA	2	5.694	2.1e-05	rs4713177	22
ENSG00000168131	OR2B2	6	27878963	27880174	-1	protein_coding	81697	OR2B2	6.87e-05	-0.212076	6	23.2	1e-06	rs4713177	22
ENSG00000168126	OR2W6P	6	27905243	27906181	1	pseudogene	81406	OR2W6P	NA	NA	5	14.09	2.33e-08	rs4713177	22
ENSG00000124657	OR2B6	6	27925019	27925960	1	protein_coding	26212	OR2B6	0.0407309	-0.0981731	1	0.002	1.25e-05	rs4713177	22
ENSG00000214374	RPLP2P1	6	27932953	27933292	1	pseudogene	442175	RPLP2P1	NA	NA	2	0.574	1.25e-05	rs4713177	22
ENSG00000216629	OR2W4P	6	27944928	27945853	1	pseudogene	81407	OR2W4P	NA	NA	3	13.56	1.16e-05	rs4713177	22
ENSG00000217539	IQCB2P	6	27978501	27980133	1	pseudogene	340192	IQCB2P	NA	NA	3	10.34	1.57e-08	rs4713177	22
ENSG00000199851	U3	6	27983346	27983553	1	snoRNA	NA	NA	NA	NA	2	2.161	1.57e-08	rs4713177	22
ENSG00000217315	OR2W2P	6	28001725	28002633	1	pseudogene	81694	OR2W2P	NA	NA	7	9.358	4.87e-07	rs4713177	22
ENSG00000187763	OR2B7P	6	28014212	28015145	1	pseudogene	81695	OR2B7P	NA	NA	4	9.358	1.13e-05	rs4713177	22
ENSG00000182477	OR2B8P	6	28021006	28021943	-1	pseudogene	65944	OR2B8P	NA	NA	5	9.358	1.13e-05	rs4713177	22
ENSG00000220721	OR1F12	6	28041094	28042011	1	pseudogene	442179	OR1F12	NA	NA	3	10.67	6.19e-06	rs4713177	22
ENSG00000272009	RP1-313I6.12	6	28046570	28048908	-1	antisense	102724889	LOC102724889	NA	NA	5	10.67	6.19e-06	rs4713177	22
ENSG00000197279	ZNF165	6	28048753	28057341	1	protein_coding	7718	ZNF165	0.00056329	0.227981	8	10.67	6.19e-06	rs4713177	22
ENSG00000219891	ZSCAN12P1	6	28058932	28061442	1	pseudogene	221584	ZSCAN12P1	NA	NA	5	5.177	6.26e-06	rs4713177	22
ENSG00000219392	RP1-265C24.5	6	28083406	28084329	1	pseudogene	NA	NA	NA	NA	13	5.89	2.07e-08	rs4713177	22
ENSG00000269293	ZSCAN16-AS1	6	28089573	28105071	-1	antisense	100129195	ZSCAN16-AS1	NA	NA	14	5.996	5.15e-06	rs4713177	22
ENSG00000196812	ZSCAN16	6	28092338	28097860	1	protein_coding	80345	ZSCAN16	2.67e-06	0.184187	8	5.996	5.15e-06	rs4713177	22
ENSG00000261839	RP1-265C24.8	6	28104627	28107456	1	lincRNA	NA	NA	NA	NA	4	5.996	6.74e-06	rs4713177	22
ENSG00000198315	ZKSCAN8	6	28109688	28127250	1	protein_coding	7745	ZKSCAN8	0.00023159	-0.142528	14	13.42	1.67e-08	rs4713177	22
ENSG00000226314	ZNF192P1	6	28129559	28137372	1	pseudogene	651302	ZNF192P1	NA	NA	16	13.42	1.2e-08	rs4713177	22
ENSG00000216901	AL022393.7	6	28143966	28144452	1	pseudogene	NA	NA	NA	NA	8	6.458	1.2e-08	rs4713177	22
ENSG00000218016	ZNF192P2	6	28155828	28157210	1	pseudogene	222701	ZNF192P2	NA	NA	1	1.189	6.02e-06	rs4713177	22
ENSG00000176933	TOB2P1	6	28185421	28186655	-1	pseudogene	222699	TOB2P1	NA	NA	6	6.938	4.5e-06	rs4713177	22
ENSG00000137185	ZSCAN9	6	28192664	28201260	1	protein_coding	7746	ZSCAN9	4.1e-08	0.461166	8	7.251	4.5e-06	rs4713177	22
ENSG00000187626	ZKSCAN4	6	28212401	28227011	-1	protein_coding	387032	ZKSCAN4	6.74e-05	0.661631	4	10.52	9.56e-06	rs4713177	22
ENSG00000189134	NKAPL	6	28227098	28228736	1	protein_coding	222698	NKAPL	0.00016562	0.0513426	2	5.18	0.0001809	rs4713177	22
ENSG00000197062	RP5-874C20.3	6	28234788	28245974	1	pseudogene	7741	ZSCAN26	NA	NA	4	6.767	0.0001356	rs4713177	22
ENSG00000137338	PGBD1	6	28249314	28270326	1	protein_coding	84547	PGBD1	1.47e-05	-0.0800605	11	14.75	3.49e-06	rs4713177	22
ENSG00000270326	RP5-874C20.6	6	28287437	28287629	-1	pseudogene	NA	NA	NA	NA	8	12.71	4.96e-06	rs4713177	22
ENSG00000235109	ZSCAN31	6	28292470	28324048	-1	protein_coding	64288	ZSCAN31	3.77e-09	1.10713	16	13.57	5.33e-06	rs4713177	22
ENSG00000189298	ZKSCAN3	6	28317691	28336947	1	protein_coding	80317	ZKSCAN3	0.00012261	-0.652443	7	13.57	5.33e-06	rs4713177	22
ENSG00000158691	ZSCAN12	6	28346732	28367511	-1	protein_coding	9753	ZSCAN12	1.44e-05	NA	11	9.552	4.97e-06	rs4713177	22
ENSG00000251877	RNU2-45P	6	28378047	28378233	1	snRNA	106480217	RNU2-45P	NA	NA	1	0.071	5.04e-06	rs4713177	22
ENSG00000187987	ZSCAN23	6	28399707	28411279	-1	protein_coding	222696	ZSCAN23	0.00270295	0.0706565	3	2.102	5.37e-06	rs4713177	22
ENSG00000231162	COX11P1	6	28414750	28415584	1	pseudogene	140468	COX11P1	NA	NA	1	0.096	5.37e-06	rs4713177	22
ENSG00000232040	SCAND3	6	28539407	28583989	-1	protein_coding	114821	SCAND3	9.71e-09	-0.785031	1	0.149	NA	rs4713177	22
ENSG00000246350	RP5-1186N24.3	6	28555155	28559524	1	processed_transcript	NA	NA	NA	NA	1	0.149	NA	rs4713177	22
ENSG00000272278	AL121932.1	6	28615974	28616042	-1	miRNA	NA	NA	NA	NA	1	0.147	0.003529	rs4713177	22
ENSG00000235570	LINC00533	6	28616063	28616843	-1	lincRNA	387055	LINC00533	NA	NA	1	0.147	0.003529	rs4713177	22
ENSG00000237425	RPSAP2	6	28699794	28700681	1	pseudogene	442181	RPSAP2	NA	NA	3	5.32	1.86e-09	rs4713177	22
ENSG00000221191	AL662890.1	6	28743693	28743800	1	miRNA	NA	NA	NA	NA	5	5.627	3.54e-09	rs4713177	22
ENSG00000235559	NOL5BP	6	28751410	28751781	-1	pseudogene	646192	NOP56P1	NA	NA	9	14.92	2.8e-09	rs4713177	22
ENSG00000265764	AL662890.3	6	28763749	28763812	-1	miRNA	NA	NA	NA	NA	12	14.92	2.09e-09	rs4713177	22
ENSG00000225173	XXbac-BPG308K3.5	6	28805646	28806783	-1	lincRNA	NA	NA	NA	NA	9	7.77	1.17e-09	rs4713177	22
ENSG00000225595	XXbac-BPG308K3.6	6	28827402	28832407	-1	lincRNA	401242	LINC01623	NA	NA	21	13.32	9.84e-10	rs4713177	22
ENSG00000213916	RPL13P	6	28829193	28829824	1	pseudogene	387044	RPL13P	NA	NA	16	13.32	9.84e-10	rs4713177	22
ENSG00000233366	ZNF90P2	6	28856609	28857683	-1	pseudogene	100419606	ZNF90P2	NA	NA	12	7.955	1.2e-09	rs4713177	22
ENSG00000224157	HCG14	6	28864307	28865099	1	antisense	414760	HCG14	NA	NA	8	7.955	3.03e-09	rs4713177	22
ENSG00000204713	TRIM27	6	28870779	28891766	-1	protein_coding	5987	TRIM27	0.878752	-0.142068	11	18.69	2.27e-09	rs4713177	22
ENSG00000212240	RNU6-930P	6	28883422	28883521	1	snRNA	106480622	RNU6-930P	NA	NA	5	18.69	2.27e-09	rs4713177	22
ENSG00000204709	C6orf100	6	28911654	28912314	1	protein_coding	729583	C6orf100	NA	NA	4	3.641	2.87e-09	rs4713177	22
ENSG00000228666	KRT18P1	6	28936907	28938237	-1	pseudogene	3879	KRT18P1	NA	NA	5	3.056	2.99e-09	rs4713177	22
ENSG00000263426	RN7SL471P	6	28945252	28945547	1	misc_RNA	106481051	RN7SL471P	NA	NA	5	3.056	2.78e-09	rs4713177	22
ENSG00000227214	HCG15	6	28953980	28955261	1	antisense	414761	HCG15	NA	NA	4	11.6	2.78e-09	rs4713177	22
ENSG00000244349	HCG16	6	28954577	28956313	1	antisense	414761	HCG16	NA	NA	4	11.6	2.78e-09	rs4713177	22
ENSG00000197935	ZNF311	6	28962562	28973093	-1	protein_coding	282890	ZNF311	0.00012945	0.377858	7	11.6	2.78e-09	rs4713177	22
ENSG00000223677	OR2AD1P	6	28994457	28995384	-1	pseudogene	79313	OR2AD1P	NA	NA	6	7.861	2.43e-09	rs4713177	22
ENSG00000204704	OR2W1	6	29011990	29013017	-1	protein_coding	26692	OR2W1	0.0865619	0.531528	4	6.576	3.14e-09	rs4713177	22
ENSG00000236909	OR2P1P	6	29039601	29040376	-1	pseudogene	442183	OR2P1P	NA	NA	3	9.377	2.9e-09	rs4713177	22
ENSG00000228364	SAR1P1	6	29044350	29044945	-1	pseudogene	646260	SAR1AP1	NA	NA	2	9.377	3.18e-09	rs4713177	22
ENSG00000204703	OR2B3	6	29053985	29055090	-1	protein_coding	442184	OR2B3	0.00133693	0.45884	3	9.377	3.18e-09	rs4713177	22
ENSG00000204702	OR2J1	6	29068386	29069658	1	protein_coding	442185	OR2J1	0.0174945	NA	1	0.549	4.05e-09	rs4713177	22
ENSG00000204701	OR2J3	6	29079668	29080603	1	protein_coding	442186	OR2J3	0.0281435	0.112859	2	1.351	2.75e-09	rs4713177	22
ENSG00000227206	XXbac-BCX196D17.5	6	29091987	29096685	1	lincRNA	NA	NA	NA	NA	1	1.351	2.75e-09	rs4713177	22
ENSG00000203492	OR2N1P	6	29105657	29106593	-1	pseudogene	26701	OR2N1P	NA	NA	3	6.764	4.31e-09	rs4713177	22
ENSG00000204700	OR2J2	6	29141311	29142351	1	protein_coding	26707	OR2J2	0.0107267	0.271259	2	3.695	3.8e-07	rs4713177	22
ENSG00000224233	OR2J4P	6	29149287	29150222	1	pseudogene	442188	OR2J4P	NA	NA	3	3.695	1.69e-09	rs4713177	22
ENSG00000230598	OR2H4P	6	29183013	29183956	1	pseudogene	442189	OR2H4P	NA	NA	4	7.579	2.29e-09	rs4713177	22
ENSG00000232505	XXbac-BPG308J9.3	6	29191750	29258217	1	lincRNA	NA	NA	NA	NA	14	10.77	2.12e-09	rs4713177	22
ENSG00000213911	OR2G1P	6	29197004	29197934	-1	pseudogene	26717	OR2G1P	NA	NA	2	10.77	5.96e-09	rs4713177	22
ENSG00000204697	OR2U1P	6	29230480	29231856	-1	pseudogene	26695	OR2U1P	NA	NA	1	6.894	0.04	rs4713177	22
ENSG00000242524	OR2U2P	6	29236239	29237198	-1	pseudogene	26694	OR2U2P	NA	NA	1	1.66	4.99e-07	rs4713177	22
ENSG00000197171	OR2B4P	6	29258488	29259430	1	pseudogene	101929006	OR2B4P	NA	NA	4	2.588	7.18e-09	rs4713177	22
ENSG00000204695	OR14J1	6	29274403	29275519	1	protein_coding	442191	OR14J1	8.02e-08	1.33547	2	10.49	6.89e-09	rs4713177	22
ENSG00000243729	OR5V1	6	29323007	29399744	-1	protein_coding	81696	OR5V1	0.00344262	0.323635	8	11.39	1.41e-09	rs4713177	22
ENSG00000112462	OR12D3	6	29341200	29343068	-1	protein_coding	81797	OR12D3	1.34e-05	0.883549	4	11.39	4.4e-09	rs4713177	22
ENSG00000168787	OR12D2	6	29364416	29365448	1	protein_coding	26529	OR12D2	0.601033	0.457835	2	6.779	2.49e-09	rs4713177	22
ENSG00000251608	OR12D1	6	29385057	29386003	1	polymorphic_pseudogene	26530	OR12D1	NA	NA	1	0.049	1.41e-09	rs4713177	22
ENSG00000204694	OR11A1	6	29393281	29424848	-1	protein_coding	26531	OR11A1	0.0434844	1.23026	1	1.81	1.35e-08	rs4713177	22
ENSG00000206474	OR10C1	6	29407083	29408731	1	protein_coding	442194	OR10C1	0.227592	0.363897	1	1.81	1.35e-08	rs4713177	22
ENSG00000204688	OR2H1	6	29424958	29432105	1	protein_coding	26716	OR2H1	0.0449041	-0.358288	1	3.428	4.44e-08	rs4713177	22
ENSG00000225797	UBDP1	6	29432373	29437583	-1	pseudogene	100286971	UBDP1	NA	NA	2	3.428	1.07e-08	rs4713177	22
ENSG00000230164	MAS1LP1	6	29442802	29443848	-1	pseudogene	646366	MAS1LP1	NA	NA	2	3.428	1.07e-08	rs4713177	22
ENSG00000229274	XXbac-BPG13B8.10	6	29465286	29478333	1	lincRNA	105375009	LOC105375009	NA	NA	1	8.43	3.55e-08	rs4713177	22
ENSG00000237988	OR2I1P	6	29520996	29521943	1	pseudogene	442197	OR2I1P	NA	NA	1	0.382	2.74e-08	rs4713177	22
ENSG00000213886	UBD	6	29523292	29527702	-1	protein_coding	10537	UBD	0.0798958	0.401531	1	0.382	2.74e-08	rs4713177	22
ENSG00000204681	GABBR1	6	29523406	29601753	-1	protein_coding	2550	GABBR1	0.99997	0.238892	2	0.382	2.63e-08	rs4713177	22
ENSG00000201330	SNORD32B	6	29550026	29550109	1	snoRNA	692092	SNORD32B	NA	NA	1	0.179	2.63e-08	rs4713177	22
ENSG00000231301	RPL13AP	6	29550285	29550802	1	pseudogene	387043	RPL13AP	NA	NA	1	0.179	2.63e-08	rs4713177	22
ENSG00000204657	OR2H2	6	29555683	29556745	1	protein_coding	7932	OR2H2	0.0899459	0.696836	1	0.179	2.63e-08	rs4713177	22
ENSG00000112246	SIM1	6	100832891	100912805	-1	protein_coding	6492	SIM1	0.996936	0.572327	9	20.4	5.41e-08	rs9322076	24
ENSG00000228082	RP1-121G13.2	6	100874994	100885360	1	antisense	NA	NA	NA	NA	1	1.822	1.58e-06	rs9322076	24
ENSG00000112249	ASCC3	6	100956070	101329248	-1	protein_coding	10973	ASCC3	1.43e-10	0.106686	270	18.97	6.14e-09	rs9322076;rs7753317;rs7769142	24
ENSG00000220695	RP1-121G13.3	6	100978152	100978928	1	pseudogene	NA	NA	NA	NA	6	18.97	7.79e-09	rs7753317;rs9322076	24
ENSG00000260000	RP3-467N11.1	6	101329347	101330863	1	antisense	NA	NA	NA	NA	12	10.17	5.02e-08	rs7769142;rs7753317	24
ENSG00000270987	RP3-467N11.2	6	101337479	101338214	1	pseudogene	NA	NA	NA	NA	17	14.99	5.02e-08	rs7769142;rs7753317	24
ENSG00000238999	snoU13	6	101405036	101405139	1	snoRNA	NA	NA	NA	NA	3	8.62	1.65e-06	rs7769142	24
ENSG00000203809	LINC00577	6	105384169	105388402	-1	lincRNA	100113403	LINC00577	NA	NA	18	20.7	1.24e-09	rs370771;rs395523	25
ENSG00000187772	LIN28B	6	105404923	105531207	1	protein_coding	389421	LIN28B	0.721962	-1.01937	40	13.51	1.24e-09	rs395523;rs370771	25
ENSG00000240230	COX19	7	938415	1015235	-1	protein_coding	90639	COX19	0.00010865	1.39868	6	3.143	7.28e-09	rs7809203	26
ENSG00000073067	CYP2W1	7	1022835	1029276	1	protein_coding	54905	CYP2W1	0.00098092	NA	14	3.143	4.97e-09	rs7809203	26
ENSG00000146540	C7orf50	7	1036622	1177896	-1	protein_coding	84310	C7orf50	0.00139621	1.0724	75	6.693	2.18e-09	rs7809203;rs6945202	26
ENSG00000199023	MIR339	7	1062569	1062662	-1	miRNA	442907	MIR339	NA	NA	9	6.693	6.06e-09	rs7809203;rs6945202	26
ENSG00000225146	AC073957.15	7	1068661	1083527	1	antisense	NA	NA	NA	NA	16	6.693	2.18e-09	rs7809203;rs6945202	26
ENSG00000164849	GPR146	7	1084212	1098897	1	protein_coding	115330	GPR146	0.00279413	0.3554	18	5.219	2.18e-09	rs7809203;rs6945202	26
ENSG00000257607	RP11-449P15.1	7	1094996	1098897	-1	antisense	NA	NA	NA	NA	12	5.219	2.18e-09	rs7809203;rs6945202	26
ENSG00000224079	AC091729.7	7	1114086	1117672	1	antisense	NA	NA	NA	NA	21	4.653	7.73e-09	rs7809203;rs6945202	26
ENSG00000226291	AC091729.8	7	1120499	1121814	1	antisense	NA	NA	NA	NA	17	5.958	9.18e-09	rs7809203;rs6945202	26
ENSG00000164850	GPER1	7	1121844	1133451	1	protein_coding	2852	GPER1	0.725421	0.809124	17	5.958	9.18e-09	rs7809203;rs6945202	26
ENSG00000178381	ZFAND2A	7	1191707	1200395	-1	protein_coding	90637	ZFAND2A	0.00038986	NA	3	2.921	2.68e-06	rs6945202	26
ENSG00000002822	MAD1L1	7	1855429	2272878	-1	protein_coding	8379	MAD1L1	2.04e-10	-0.0844627	62	16.12	1.49e-08	rs11773627;rs11760737	27
ENSG00000176349	AC110781.3	7	1878222	1889567	1	protein_coding	NA	NA	NA	NA	1	0.501	2.84e-06	rs11773627	27
ENSG00000186472	PCLO	7	82383329	82792246	-1	protein_coding	27445	PCLO	1	-0.0075772	92	9.28	2.46e-09	rs10269313;rs2189247	29
ENSG00000234273	AC073071.1	7	109162038	109237223	-1	lincRNA	NA	NA	NA	NA	12	5.973	1.06e-07	rs58104186	30
ENSG00000128573	FOXP2	7	113726382	114333827	1	protein_coding	93986	FOXP2	0.996179	-0.404517	71	16.95	4.77e-09	rs10953758;rs71573104	31
ENSG00000224595	AC073626.2	7	114054299	114059930	-1	antisense	NA	NA	NA	NA	6	16.95	7.58e-09	rs10953758	31
ENSG00000202334	RNA5SP238	7	114253842	114253961	-1	rRNA	100873496	RNA5SP238	NA	NA	1	1.303	9.61e-09	rs71573104	31
ENSG00000272479	RP11-301G7.1	8	40377084	40377677	-1	lincRNA	NA	NA	NA	NA	51	13.58	4.01e-09	rs2722442;rs11783990	32
ENSG00000165061	ZMAT4	8	40388109	40755352	-1	protein_coding	79698	ZMAT4	0.0193269	-0.445555	30	9.1	1.49e-08	rs2722442;rs11783990	32
ENSG00000164830	OXR1	8	107282473	107764922	1	protein_coding	55074	OXR1	0.488534	0.23532	35	14.66	2.91e-08	rs776935	33
ENSG00000253582	RP11-649G15.2	8	107532702	107669776	-1	antisense	105375700	LOC105375700	NA	NA	2	6.514	3.47e-08	rs776935	33
ENSG00000253676	TAGLN2P1	8	107709655	107710241	-1	pseudogene	100418887	TAGLN2P1	NA	NA	10	12.15	3.73e-08	rs776935	33
ENSG00000251892	RNU7-84P	8	107742023	107742084	-1	snRNA	100151681	RNU7-84P	NA	NA	6	13.21	2.91e-08	rs776935	33
ENSG00000174429	ABRA	8	107771711	107782473	-1	protein_coding	137735	ABRA	4.06e-06	-0.89581	8	14.66	7.9e-08	rs776935	33
ENSG00000164796	CSMD3	8	113235157	114449328	-1	protein_coding	114788	CSMD3	1	0.201288	65	17.4	2.01e-08	rs62519760	34
ENSG00000227514	RP11-709P2.1	8	114388898	114389456	1	pseudogene	NA	NA	NA	NA	3	8.787	0.0005762	rs62519760	34
ENSG00000201074	Y_RNA	9	96180137	96180248	1	misc_RNA	NA	NA	NA	NA	2	10.09	0.01638	rs10156602	35
ENSG00000237385	RP11-165J3.5	9	96192624	96193581	-1	antisense	NA	NA	NA	NA	1	5.488	4.16e-12	rs10156602	35
ENSG00000227603	RP11-165J3.6	9	96197614	96199403	-1	antisense	NA	NA	NA	NA	2	5.488	4.16e-12	rs10156602	35
ENSG00000188938	FAM120AOS	9	96208776	96215874	-1	protein_coding	158293	FAM120AOS	0.514391	0.00743144	9	8.712	4.16e-12	rs10156602	35
ENSG00000048828	FAM120A	9	96214004	96328397	1	protein_coding	23196	FAM120A	0.999907	-0.298117	69	18.33	3.92e-12	rs10156602	35
ENSG00000263875	AL353629.1	9	96327975	96328082	-1	miRNA	NA	NA	NA	NA	2	17.04	2.95e-11	rs10156602	35
ENSG00000197724	PHF2	9	96338689	96441869	1	protein_coding	5253	PHF2	0.994132	0.745198	71	10.58	1.67e-12	rs10156602;rs7851271;rs7033146	35
ENSG00000136869	TLR4	9	120466610	120479149	1	protein_coding	7099	TLR4	4.18e-06	-0.800744	1	6.592	9.03e-09	rs10818076	36
ENSG00000251847	snoZ13_snr52	9	120493653	120493749	-1	snoRNA	NA	NA	NA	NA	11	6.592	9.03e-09	rs10818076	36
ENSG00000269609	RP11-18I14.10	10	104209574	104220863	1	processed_transcript	100505761	RPARP-AS1	NA	NA	1	2.447	0.0003313	rs12767131	37
ENSG00000120055	C10orf95	10	104209594	104211300	-1	protein_coding	79946	C10orf95	0.0113912	-0.659448	1	2.447	0.0003313	rs12767131	37
ENSG00000138111	TMEM180	10	104221149	104236802	1	protein_coding	79847	TMEM180	0.00017866	2.88275	4	9.802	7.22e-08	rs12767131	37
ENSG00000138107	ACTR1A	10	104238986	104262482	-1	protein_coding	10121	ACTR1A	0.941234	-0.272535	6	9.802	2.58e-09	rs12767131	37
ENSG00000273262	RP11-18I14.11	10	104242796	104243316	1	antisense	NA	NA	NA	NA	5	9.802	2.82e-09	rs12767131	37
ENSG00000107882	SUFU	10	104263744	104393292	1	protein_coding	51684	SUFU	0.999161	0.12486	13	14.35	2.58e-09	rs12767131	37
ENSG00000242311	RN7SL21P	10	104285722	104286001	1	misc_RNA	NA	RN7SL21P	NA	NA	3	10.9	4.19e-09	rs12767131	37
ENSG00000228657	RP11-170J3.2	10	104332514	104332982	-1	pseudogene	NA	NA	NA	NA	1	14.35	0.004979	rs12767131	37
ENSG00000207029	RNU6-43P	10	104351281	104351387	1	snRNA	106478921	RNU6-43P	NA	NA	4	14.35	0.002115	rs12767131	37
ENSG00000166272	WBP1L	10	104503727	104576021	1	protein_coding	54838	WBP1L	0.909387	0.61464	5	5.181	4.71e-09	rs10509759	37
ENSG00000252994	RNU6-1231P	10	104563686	104563788	1	snRNA	106480104	RNU6-1231P	NA	NA	3	5.181	3.7e-06	rs10509759	37
ENSG00000148795	CYP17A1	10	104590288	104597290	-1	protein_coding	1586	CYP17A1	0.0350306	0.086682	2	5.056	5.91e-12	rs10509759	37
ENSG00000203886	CYP17A1-AS1	10	104592478	104594273	1	antisense	102724307	CYP17A1-AS1	NA	NA	1	4.231	5.91e-12	rs10509759	37
ENSG00000213061	PFN1P11	10	104597768	104605230	-1	pseudogene	100873784	PFN1P11	NA	NA	2	5.056	5.91e-12	rs10509759	37
ENSG00000236937	PTGES3P4	10	104605352	104605707	1	pseudogene	106480775	PTGES3P4	NA	NA	1	5.056	1.29e-11	rs10509759	37
ENSG00000166275	C10orf32	10	104613980	104624718	1	protein_coding	119032	C10orf32	0.0316379	0.490358	5	5.827	8.5e-12	rs10509759	37
ENSG00000270316	C10orf32-ASMT	10	104614029	104661656	1	protein_coding	100528007	C10orf32-ASMT	NA	NA	19	6.204	1.06e-12	rs10509759	37
ENSG00000201080	RNU6-372P	10	104628178	104628276	1	snRNA	NA	RNU6-372P	NA	NA	4	5.827	1.17e-11	rs10509759	37
ENSG00000214435	AS3MT	10	104629273	104661656	1	protein_coding	57412	AS3MT	5.09e-07	0.726881	17	6.204	1.06e-12	rs10509759	37
ENSG00000235266	RP11-753C18.8	10	104647631	104647945	-1	pseudogene	NA	NA	NA	NA	8	6.204	1.49e-12	rs10509759	37
ENSG00000272912	RP11-724N1.1	10	104674342	104675161	1	lincRNA	NA	NA	NA	NA	4	5.348	1.2e-12	rs10509759	37
ENSG00000148842	CNNM2	10	104678050	104849978	1	protein_coding	54805	CNNM2	0.994106	-0.511524	37	18.07	6.35e-13	rs10509759	37
ENSG00000076685	NT5C2	10	104845940	104953056	-1	protein_coding	22978	NT5C2	0.0521979	0.0483286	29	13.5	1.1e-12	rs10509759	37
ENSG00000237827	RP11-332O19.2	10	104884774	104885173	-1	pseudogene	NA	NA	NA	NA	4	6.568	1.83e-12	rs10509759	37
ENSG00000213277	MARCKSL1P1	10	104935311	104935851	1	pseudogene	100913183	MARCKSL1P1	NA	NA	5	11.41	2.5e-12	rs10509759	37
ENSG00000148798	INA	10	105036920	105050108	1	protein_coding	9118	INA	0.292917	-0.860661	1	1.516	0.0002247	rs10509759	37
ENSG00000156374	PCGF6	10	105062553	105110891	-1	protein_coding	84108	PCGF6	0.00025172	-0.491785	1	1.516	0.0002247	rs10509759	37
ENSG00000134571	MYBPC3	11	47352957	47374253	-1	protein_coding	4607	MYBPC3	1.35e-06	-0.432352	28	14.21	6.79e-06	rs7111957	38
ENSG00000066336	SPI1	11	47376411	47400127	-1	protein_coding	6688	SPI1	0.897231	NA	54	14.21	7.6e-09	rs7111957	38
ENSG00000255197	RP11-750H9.5	11	47404699	47430741	-1	antisense	NA	NA	NA	NA	26	21.7	7.6e-09	rs7111957	38
ENSG00000265910	AC090559.2	11	47407633	47407733	-1	miRNA	NA	NA	NA	NA	8	10.63	7.6e-09	rs7111957	38
ENSG00000264583	MIR4487	11	47422521	47422593	1	miRNA	100616222	MIR4487	NA	NA	11	21.7	1.23e-08	rs7111957	38
ENSG00000165915	SLC39A13	11	47428683	47438047	1	protein_coding	91252	SLC39A13	0.011852	-0.332419	23	21.7	1.07e-08	rs7111957;rs1228001	38
ENSG00000165916	PSMC3	11	47440320	47447993	-1	protein_coding	5702	PSMC3	0.9792	-0.404697	21	14.02	1.07e-08	rs7111957;rs1228001	38
ENSG00000165917	RAPSN	11	47459308	47470730	-1	protein_coding	5913	RAPSN	0.0326446	0.0487816	5	10.14	8.09e-09	rs7111957	38
ENSG00000252327	RNU6-1302P	11	47461557	47461617	-1	snRNA	NA	RNU6-1302P	NA	NA	5	10.14	8.09e-09	rs7111957	38
ENSG00000149187	CELF1	11	47487496	47587121	-1	protein_coding	10658	CELF1	0.998617	-0.376216	12	17.63	4.06e-08	rs7111957	38
ENSG00000270072	RP11-750H9.7	11	47535157	47536441	-1	sense_intronic	NA	NA	NA	NA	2	9.14	1.24e-07	rs7111957	38
ENSG00000265559	RN7SL652P	11	47579088	47579385	-1	misc_RNA	106479460	RN7SL652P	NA	NA	3	11.24	4.06e-08	rs7111957	38
ENSG00000213619	NDUFS3	11	47586888	47606114	1	protein_coding	4722	NDUFS3	0.047137	-0.0123446	2	11.24	4.06e-08	rs7111957	38
ENSG00000110536	PTPMT1	11	47586982	47595013	1	protein_coding	114971	PTPMT1	0.459152	NA	2	11.24	4.06e-08	rs7111957	38
ENSG00000123444	KBTBD4	11	47593749	47600567	-1	protein_coding	55709	KBTBD4	0.0180744	-0.492621	1	7.302	4.06e-08	rs7111957	38
ENSG00000223187	Y_RNA	11	47636450	47636546	-1	misc_RNA	NA	NA	NA	NA	1	7.458	NA	rs7111957	38
ENSG00000109919	MTCH2	11	47638867	47664175	-1	protein_coding	23788	MTCH2	0.166788	0.0369336	8	7.458	1.25e-08	rs7111957	38
ENSG00000165923	AGBL2	11	47681143	47736941	-1	protein_coding	79841	AGBL2	6.81e-12	-0.765874	8	7.718	3.12e-08	rs7111957	38
ENSG00000109920	FNBP4	11	47738072	47788995	-1	protein_coding	23360	FNBP4	0.999993	-0.713792	10	7.718	9.25e-08	rs7111957	38
ENSG00000200090	Y_RNA	11	47748446	47748544	-1	misc_RNA	NA	NA	NA	NA	4	6.342	1.15e-07	rs7111957	38
ENSG00000252447	snoU13	11	47749098	47749189	1	snoRNA	NA	NA	NA	NA	4	6.342	1.15e-07	rs7111957	38
ENSG00000030066	NUP160	11	47799639	47870107	-1	protein_coding	23279	NUP160	0.0239792	-0.345694	8	9.054	9.25e-08	rs7111957	38
ENSG00000271543	RP11-692M12.5	11	47817721	47817931	1	pseudogene	NA	NA	NA	NA	2	7.721	1.49e-07	rs7111957	38
ENSG00000252941	RNA5SP340	11	47825848	47825954	-1	rRNA	100873603	RNA5SP340	NA	NA	1	0.545	NA	rs7111957	38
ENSG00000252874	Y_RNA	11	47841755	47841844	-1	misc_RNA	NA	NA	NA	NA	1	2.609	2.6e-07	rs7111957	38
ENSG00000271557	RP11-692M12.4	11	47862876	47863234	1	pseudogene	NA	NA	NA	NA	1	4.424	1.97e-07	rs7111957	38
ENSG00000254780	RP11-793I11.1	11	47926875	47927159	-1	pseudogene	NA	NA	NA	NA	1	1.218	NA	rs7111957	38
ENSG00000149177	PTPRJ	11	48002113	48189670	1	protein_coding	5795	PTPRJ	2.39e-05	NA	12	11.67	6.69e-07	rs11040048	38
ENSG00000175619	OR4B1	11	48238344	48239314	1	protein_coding	119765	OR4B1	0.010938	0.304381	3	3.967	6.95e-08	rs11040048	38
ENSG00000255514	OR4B2P	11	48248981	48249862	1	pseudogene	26690	OR4B2P	NA	NA	3	4.959	6.95e-08	rs11040048	38
ENSG00000172208	OR4X2	11	48266608	48267622	1	protein_coding	119764	OR4X2	1.11e-08	0.281681	1	7.562	9.66e-08	rs11040048	38
ENSG00000176567	OR4X1	11	48285413	48286330	1	protein_coding	390113	OR4X1	0.00015767	0.54039	1	3.506	NA	rs11040048	38
ENSG00000176555	OR4S1	11	48327775	48328704	1	protein_coding	256148	OR4S1	0.00461719	0.795798	3	2.711	4.92e-08	rs11040048	38
ENSG00000176547	OR4C3	11	48346472	48347507	1	protein_coding	256144	OR4C3	0.00874513	0.0970577	3	2.329	3.04e-08	rs11040048	38
ENSG00000197161	OR4C4P	11	48366900	48373999	-1	pseudogene	79550	OR4C4P	NA	NA	9	14.6	4.87e-08	rs11040048;rs75184591	38
ENSG00000176540	OR4C5	11	48387037	48388017	-1	protein_coding	79346	OR4C5	0.0165677	NA	10	16.87	5.79e-08	rs75184591;rs11040048	38
ENSG00000182565	OR4C2P	11	48441762	48442825	1	pseudogene	119750	OR4C2P	NA	NA	5	7.288	3.36e-08	rs11040048;rs75184591	38
ENSG00000184789	OR4C10P	11	48453769	48454699	-1	pseudogene	79526	OR4C10P	NA	NA	5	7.288	3.36e-08	rs75184591;rs11040048	38
ENSG00000254925	OR4C9P	11	48485605	48486529	-1	pseudogene	79530	OR4C9P	NA	NA	7	5.574	9.26e-08	rs75184591;rs11040048	38
ENSG00000255215	OR4R1P	11	48507915	48508377	-1	pseudogene	79528	OR4R1P	NA	NA	12	10.32	1.22e-07	rs75184591;rs11040048	38
ENSG00000237388	OR4A47	11	48510269	48511332	1	protein_coding	403253	OR4A47	1.43e-05	0.482909	14	7.438	1.19e-07	rs75184591;rs11040048	38
ENSG00000255113	OR4A48P	11	48513578	48513968	1	pseudogene	403254	OR4A48P	NA	NA	17	7.438	1.19e-07	rs75184591;rs11040048	38
ENSG00000255304	OR4A46P	11	48517900	48518832	1	pseudogene	403252	OR4A46P	NA	NA	18	7.438	6.57e-08	rs75184591;rs11040048	38
ENSG00000254832	OR4A40P	11	48533825	48534772	1	pseudogene	390116	OR4A40P	NA	NA	31	5.381	5.71e-08	rs75184591;rs11040048	38
ENSG00000255534	OR4A43P	11	48547616	48548523	1	pseudogene	390117	OR4A43P	NA	NA	38	5.343	1.66e-07	rs75184591;rs11040048	38
ENSG00000213607	OR4A45P	11	48600988	48601888	1	pseudogene	403251	OR4A45P	NA	NA	31	7.494	1.12e-07	rs75184591;rs11040048	38
ENSG00000255297	OR4A41P	11	48611312	48612239	1	pseudogene	403247	OR4A41P	NA	NA	39	7.902	1.11e-07	rs75184591;rs11040048	38
ENSG00000254674	OR4A42P	11	48631615	48632552	1	pseudogene	403248	OR4A42P	NA	NA	17	2.585	1.51e-07	rs75184591;rs11040048	38
ENSG00000255053	OR4A44P	11	48649098	48650045	1	pseudogene	403250	OR4A44P	NA	NA	14	8.428	1.06e-07	rs75184591;rs11040048	38
ENSG00000255551	RP11-56P9.5	11	48901663	48906789	1	pseudogene	NA	NA	NA	NA	24	5.666	3.25e-07	rs75184591;rs11040048	38
ENSG00000254728	RP11-56P9.10	11	48903275	48923733	-1	pseudogene	NA	NA	NA	NA	32	11.35	1.72e-07	rs75184591;rs11040048	38
ENSG00000254920	RP11-56P9.6	11	48914808	48920255	1	pseudogene	NA	NA	NA	NA	7	11.35	3.27e-07	rs75184591;rs11040048	38
ENSG00000255527	RP11-56P9.4	11	48928655	48930498	1	pseudogene	NA	NA	NA	NA	19	11.35	1.72e-07	rs75184591;rs11040048	38
ENSG00000249910	TRIM51CP	11	48967246	48973447	1	pseudogene	100130105	TRIM51CP	NA	NA	31	11.38	2.53e-07	rs75184591;rs11040048	38
ENSG00000254517	RP11-56P9.8	11	48981480	48983362	1	pseudogene	NA	NA	NA	NA	7	4.199	4.27e-07	rs75184591;rs11040048	38
ENSG00000220948	TRIM51GP	11	48997053	49003247	-1	pseudogene	120824	TRIM51GP	NA	NA	7	4.199	4.01e-07	rs75184591;rs11040048	38
ENSG00000254764	TRIM53CP	11	49007423	49013433	-1	pseudogene	340970	TRIM53CP	NA	NA	6	3.591	3.98e-07	rs11040048;rs75184591	38
ENSG00000205044	RP11-56P9.11	11	49035495	49037446	-1	pseudogene	NA	NA	NA	NA	5	1.268	1.95e-07	rs11040048;rs75184591	38
ENSG00000182053	TRIM49B	11	49050504	49059579	1	protein_coding	283116	TRIM49B	7.56e-05	0.0453407	4	10.93	1.95e-07	rs75184591	38
ENSG00000214891	TRIM64C	11	49075266	49080664	-1	protein_coding	646754	TRIM64C	0.0121166	NA	6	3.541	2.81e-08	rs75184591;rs11040048	38
ENSG00000254801	CTD-2132H18.3	11	49092304	49092552	-1	pseudogene	NA	NA	NA	NA	4	3.541	1.27e-07	rs75184591;rs11040048	38
ENSG00000229361	UBTFL7	11	49103459	49104649	1	pseudogene	646759	UBTFL7	NA	NA	4	1.09	2.87e-07	rs75184591;rs11040048	38
ENSG00000255452	RP11-107P7.1	11	49113956	49114319	1	pseudogene	NA	NA	NA	NA	3	4.39	0.0007438	rs75184591;rs11040048	38
ENSG00000254412	RP11-107P7.6	11	49119715	49122720	-1	pseudogene	NA	NA	NA	NA	3	4.39	6.68e-08	rs75184591;rs11040048	38
ENSG00000255338	RP11-107P7.2	11	49132308	49132772	1	pseudogene	NA	NA	NA	NA	4	2.972	6.68e-08	rs11040048;rs75184591	38
ENSG00000254993	RP11-107P7.5	11	49138571	49146122	-1	pseudogene	NA	NA	NA	NA	5	2.972	6.68e-08	rs11040048;rs75184591	38
ENSG00000254567	RP11-107P7.4	11	49155205	49156352	-1	pseudogene	NA	NA	NA	NA	2	1.231	0.003627	rs75184591;rs11040048	38
ENSG00000086205	FOLH1	11	49168187	49230222	-1	protein_coding	2346	FOLH1	0.253397	-0.0941583	2	4.566	9.22e-05	rs11040048	38
ENSG00000255532	CTD-2026G22.1	11	49327266	49401221	1	pseudogene	NA	NA	NA	NA	4	10.48	0.0001477	rs11040048	38
ENSG00000123447	TYRL	11	49426527	49437299	-1	pseudogene	7300	TYRL	NA	NA	1	3.579	0.0005329	rs11040048	38
ENSG00000254496	CBX3P8	11	49427742	49428266	1	pseudogene	100286965	CBX3P8	NA	NA	1	3.579	0.0005329	rs11040048	38
ENSG00000226268	RP11-61N20.3	11	49455025	49455990	-1	pseudogene	NA	NA	NA	NA	1	6.866	0.001929	rs11040048	38
ENSG00000205035	RP11-707M1.1	11	49580098	49831971	1	pseudogene	440040	LOC440040	NA	NA	3	5.562	NA	rs11040048	38
ENSG00000254602	AP000662.4	11	57405497	57420263	1	sense_overlapping	NA	NA	NA	NA	3	1.56	1.85e-08	rs2509805	39
ENSG00000208009	MIR130A	11	57408671	57408759	1	miRNA	406919	MIR130A	NA	NA	2	1.56	7.16e-07	rs2509805	39
ENSG00000166793	YPEL4	11	57412560	57417417	-1	protein_coding	219539	YPEL4	0.805555	-2.01157	3	1.56	1.85e-08	rs2509805	39
ENSG00000172409	CLP1	11	57416465	57429340	1	protein_coding	10978	CLP1	0.937605	-0.832603	7	21.8	1.79e-08	rs2509805	39
ENSG00000156599	ZDHHC5	11	57435219	57468659	1	protein_coding	25921	ZDHHC5	0.999924	-0.831025	14	21.8	1.09e-08	rs2509805	39
ENSG00000156603	MED19	11	57471186	57479693	-1	protein_coding	219541	MED19	0.68379	-0.1517	14	11.04	1.05e-08	rs2509805	39
ENSG00000213593	TMX2	11	57480072	57508445	1	protein_coding	51075	TMX2	0.429914	0.120517	20	11.04	1.02e-08	rs2509805	39
ENSG00000254462	TMX2-CTNND1	11	57480077	57559058	1	protein_coding	100528016	TMX2-CTNND1	NA	NA	32	15.11	1.02e-08	rs2509805	39
ENSG00000213592	AP000662.9	11	57485516	57486002	-1	pseudogene	NA	NA	NA	NA	11	11.04	1.05e-08	rs2509805	39
ENSG00000211450	C11orf31	11	57508825	57510986	1	protein_coding	280636	C11orf31	0.00078171	-0.641634	4	9.805	2.09e-08	rs2509805	39
ENSG00000254732	RP11-691N7.6	11	57509635	57560715	1	protein_coding	NA	NA	NA	NA	17	15.11	2.09e-08	rs2509805	39
ENSG00000233436	BTBD18	11	57510986	57519253	-1	protein_coding	643376	BTBD18	NA	-0.504689	10	9.805	2.09e-08	rs2509805	39
ENSG00000198561	CTNND1	11	57520715	57587018	1	protein_coding	1500	CTNND1	0.995313	-1.42886	16	15.11	2.23e-08	rs2509805	39
ENSG00000255303	OR5BA1P	11	57633770	57634751	-1	pseudogene	81210	OR5BA1P	NA	NA	3	5.315	4.52e-09	rs2509805	39
ENSG00000255266	RP11-734C14.2	11	57637794	57638043	-1	pseudogene	NA	NA	NA	NA	3	5.315	4.52e-09	rs2509805	39
ENSG00000180714	OR5AZ1P	11	57684769	57685711	-1	pseudogene	283193	OR5AZ1P	NA	NA	5	13.04	8.91e-10	rs2509805	39
ENSG00000175115	PACS1	11	65837834	66012218	1	protein_coding	55690	PACS1	0.999906	-0.885764	4	7.183	1.38e-08	rs801733	40
ENSG00000238763	snoU13	11	65920092	65920196	1	snoRNA	NA	NA	NA	NA	2	4.66	7.82e-08	rs801733	40
ENSG00000182667	NTM	11	131240373	132206716	1	protein_coding	50863	NTM	0.525366	-0.215951	8	10.65	4.22e-09	rs1526565	41
ENSG00000271624	RP11-651K21.1	11	131640689	131641532	-1	pseudogene	NA	NA	NA	NA	8	10.65	4.22e-09	rs1526565	41
ENSG00000174527	MYO1H	12	109785708	109893328	1	protein_coding	283446	MYO1H	2.92e-17	0.269947	129	14.71	8.57e-09	rs35393419;rs6606728	42
ENSG00000256560	RP11-256L11.1	12	109791888	109797293	-1	lincRNA	101928138	LINC01486	NA	NA	9	12.88	0.0002929	rs35393419	42
ENSG00000255655	RP11-256L11.3	12	109883215	109885302	-1	antisense	NA	NA	NA	NA	33	14.71	8.57e-09	rs35393419;rs6606728	42
ENSG00000110906	KCTD10	12	109886461	109915349	-1	protein_coding	83892	KCTD10	0.17267	0.585873	85	14.71	8.57e-09	rs35393419;rs6606728	42
ENSG00000151148	UBE3B	12	109915207	109974507	1	protein_coding	89910	UBE3B	0.00938771	0.786226	78	11.41	1.9e-08	rs6606728	42
ENSG00000139428	MMAB	12	109991542	110011679	-1	protein_coding	326625	MMAB	0.00387716	2.91819	31	9.76	1.62e-06	rs6606728	42
ENSG00000200274	RNU4-32P	12	110005780	110005920	-1	snRNA	106479572	RNU4-32P	NA	NA	15	9.76	1.62e-06	rs6606728	42
ENSG00000110921	MVK	12	110011060	110035067	1	protein_coding	4598	MVK	0.0421614	-0.508882	33	15.05	1.63e-06	rs6606728	42
ENSG00000226161	EIF4A1P5	13	37512537	37513631	-1	pseudogene	390394	EIF4A1P5	NA	NA	1	3.564	5.14e-07	rs9576155	43
ENSG00000120697	ALG5	13	37523912	37574398	-1	protein_coding	29880	ALG5	0.00342997	NA	10	18.01	2.99e-07	rs9576155	43
ENSG00000120699	EXOSC8	13	37572953	37583750	1	protein_coding	11340	EXOSC8	1.76e-05	0.161295	3	18.01	3.03e-07	rs9576155	43
ENSG00000102710	SUPT20H	13	37583449	37633850	-1	protein_coding	55578	SUPT20H	0.00138199	-0.417264	7	18.01	9.77e-09	rs9576155	43
ENSG00000221100	AL138706.1	13	37608814	37608929	-1	miRNA	NA	NA	NA	NA	4	3.133	9.77e-09	rs9576155	43
ENSG00000102837	OLFM4	13	53602894	53626192	1	protein_coding	10562	OLFM4	2.41e-06	0.814566	2	4.975	5.69e-16	rs12552;rs2806985	44
ENSG00000237092	LINC01065	13	53720674	53725943	-1	lincRNA	102723875	LINC01065	NA	NA	2	1.494	2e-11	rs1951722	44
ENSG00000225510	PCDH8P1	13	53774116	53776547	1	pseudogene	100133285	PCDH8P1	NA	NA	33	17.64	1.52e-12	rs1951722;rs4525388;rs2806985;rs2491124	44
ENSG00000241613	RN7SL618P	13	53832212	53832505	1	misc_RNA	106479447	RN7SL618P	NA	NA	10	15.58	3.13e-11	rs9536383;rs1951722;rs2806985;rs9536347	44
ENSG00000220990	AL450423.1	13	53941980	53942091	-1	miRNA	NA	NA	NA	NA	29	21.1	4.15e-10	rs7332332;rs9536383;rs6561724	44
ENSG00000258901	CTD-2298J14.1	14	42024865	42025258	-1	pseudogene	NA	NA	NA	NA	13	4.745	3.24e-08	rs8013655	45
ENSG00000258636	CTD-2298J14.2	14	42057064	42074059	-1	lincRNA	NA	NA	NA	NA	16	21.5	4.78e-10	rs8013655	45
ENSG00000251858	SNORA31	14	42063666	42063794	1	snoRNA	677814	SNORA31	NA	NA	6	11.96	1.82e-09	rs8013655	45
ENSG00000165379	LRFN5	14	42076773	42373752	1	protein_coding	145581	LRFN5	0.712325	0.122069	41	21.5	3.3e-10	rs8013655	45
ENSG00000259434	RP11-720L8.1	15	37657228	37783009	-1	lincRNA	NA	NA	NA	NA	49	17.36	1.85e-09	rs1520946;rs614443	46
ENSG00000243122	RP11-25H11.1	15	37782892	37783304	1	pseudogene	NA	NA	NA	NA	3	9.643	4.05e-08	rs1520946	46
ENSG00000167139	TBC1D21	15	74165949	74181555	1	protein_coding	161514	TBC1D21	0.0223268	-0.0461509	1	10.97	1.54e-08	rs62004865	47
ENSG00000222064	AC108137.1	15	74183750	74183828	1	miRNA	NA	NA	NA	NA	1	10.97	1.54e-08	rs62004865	47
ENSG00000261801	LOXL1-AS1	15	74200424	74220589	-1	antisense	100287616	LOXL1-AS1	NA	NA	2	11.8	4.19e-09	rs62004865	47
ENSG00000129038	LOXL1	15	74218330	74244478	1	protein_coding	4016	LOXL1	NA	-0.451257	1	3.416	0.0224	rs62004865	47
ENSG00000261543	RP11-665J16.1	15	74445141	74471567	-1	antisense	NA	NA	NA	NA	17	14.63	4.78e-06	rs35917667	47
ENSG00000129009	ISLR	15	74466012	74469213	1	protein_coding	3671	ISLR	0.00043648	0.403602	16	14.63	5.55e-06	rs35917667	47
ENSG00000137868	STRA6	15	74471807	74504608	-1	protein_coding	64220	STRA6	3.25e-08	-0.108782	31	14.63	3.39e-08	rs35917667	47
ENSG00000259264	RP11-60L3.1	15	74495046	74513896	1	antisense	NA	NA	NA	NA	15	12.18	3.39e-08	rs35917667	47
ENSG00000140481	CCDC33	15	74509613	74628813	1	protein_coding	80125	CCDC33	8.63e-09	-0.0853138	3	8.191	6.23e-07	rs35917667	47
ENSG00000260411	RP11-420N3.2	16	5289803	6826015	1	processed_transcript	NA	NA	NA	NA	51	14.77	8.64e-09	rs34315978;rs7198605;rs35735593	48
ENSG00000078328	RBFOX1	16	6069095	7763340	1	protein_coding	54715	RBFOX1	0.935961	1.09605	51	14.77	8.64e-09	rs34315978;rs7198605;rs35735593	48
ENSG00000257180	RP11-509E10.1	16	6106976	6142955	1	sense_intronic	NA	NA	NA	NA	47	14.77	8.64e-09	rs34315978;rs7198605;rs35735593	48
ENSG00000186566	GPATCH8	17	42472652	42580798	-1	protein_coding	23131	GPATCH8	0.999495	-0.594352	1	0.099	NA	rs201018268	50
ENSG00000073670	ADAM11	17	42836399	42859214	1	protein_coding	4185	ADAM11	0.0247364	0.499905	1	0.061	NA	rs201018268	50
ENSG00000161714	PLCD3	17	43186335	43210721	-1	protein_coding	113026	PLCD3	0.0001433	NA	11	13.33	2.5e-11	rs575346808;rs60289499;rs4986172	50
ENSG00000181513	ACBD4	17	43209967	43221548	1	protein_coding	79777	ACBD4	1.83e-05	-0.326407	19	22.7	1.2e-15	rs575346808;rs60289499;rs4986172;rs201018268	50
ENSG00000186834	HEXIM1	17	43224684	43229468	1	protein_coding	10614	HEXIM1	0.9444	-1.49531	17	22.7	1.2e-15	rs4986172;rs60289499;rs201018268	50
ENSG00000224505	AC002117.1	17	43227767	43238877	-1	antisense	NA	NA	NA	NA	19	22.7	1.2e-15	rs4986172;rs60289499;rs201018268	50
ENSG00000168517	HEXIM2	17	43238067	43247407	1	protein_coding	124790	HEXIM2	0.368237	-0.798107	11	9.347	1.4e-12	rs60289499;rs4986172;rs558237097	50
ENSG00000267288	RP13-890H12.2	17	43246172	43248951	-1	antisense	105371795	LOC105371795	NA	NA	7	9.347	1.4e-12	rs60289499;rs558237097	50
ENSG00000267121	CTD-2020K17.1	17	43268298	43299589	-1	antisense	339192	LOC339192	NA	NA	3	9.907	3.1e-09	rs60289499;rs529656112	50
ENSG00000159314	ARHGAP27	17	43471275	43511787	-1	protein_coding	201176	ARHGAP27	0.00125584	-0.761628	3	6.983	NA	rs201018268;rs558237097	50
ENSG00000264038	AC091132.2	17	43494179	43494272	-1	miRNA	NA	NA	NA	NA	1	2.178	NA	rs201018268	50
ENSG00000225190	PLEKHM1	17	43513266	43568115	-1	protein_coding	9842	PLEKHM1	0.840543	-0.663068	2	6.983	NA	rs201018268;rs558237097	50
ENSG00000264589	MAPT-AS1	17	43921017	43972966	-1	antisense	100128977	MAPT-AS1	NA	NA	1	3.89	NA	rs529656112	50
ENSG00000186868	MAPT	17	43971748	44105700	1	protein_coding	4137	MAPT	4.68e-05	2.01024	4	4.902	NA	rs529656112;rs201018268	50
ENSG00000262881	RP11-669E14.4	17	43985036	43988145	-1	antisense	NA	NA	NA	NA	1	3.89	NA	rs529656112	50
ENSG00000256762	STH	17	44076616	44077060	1	protein_coding	246744	STH	0.00444467	0.274193	1	4.902	NA	rs529656112	50
ENSG00000196628	TCF4	18	52889562	53332018	-1	protein_coding	6925	TCF4	0.999867	0.443466	124	19.5	1.09e-13	rs1261081;rs1942262;rs1893431;rs893946;rs9320016;rs1788030;rs4801150;rs10503002;rs12958048;rs2924328	51
ENSG00000267028	RP11-619L19.1	18	53119764	53150171	1	antisense	105372127	TCF4-AS1	NA	NA	10	10.47	1.59e-11	rs12958048;rs10503002;rs4801150;rs9320016;rs2924328	51
ENSG00000264571	MIR4529	18	53146452	53146529	1	miRNA	100616290	MIR4529	NA	NA	4	6.617	8.67e-06	rs2924328	51
ENSG00000267402	RP11-619L19.2	18	53159406	53163623	1	antisense	NA	NA	NA	NA	4	8.25	1.57e-08	rs2924328;rs10503002	51
ENSG00000251247	ZNF345	19	37341263	37403931	1	protein_coding	25850	ZNF345	2.33e-11	-0.704688	15	13.82	0.000111	rs528504	52
ENSG00000185869	ZNF829	19	37379026	37407193	-1	protein_coding	374899	ZNF829	1.85e-08	-0.32869	18	13.82	3.35e-05	rs528504	52
ENSG00000243297	RPL31P61	19	37392644	37393019	1	pseudogene	100271487	RPL31P61	NA	NA	6	13.82	0.0001173	rs528504	52
ENSG00000198453	ZNF568	19	37407231	37489602	1	protein_coding	374900	ZNF568	4.91e-09	-0.408377	109	19.72	7.9e-09	rs528504	52
ENSG00000197050	ZNF420	19	37498759	37621216	1	protein_coding	147923	ZNF420	3.29e-08	1.11207	81	15.65	5.34e-05	rs528504	52
ENSG00000267345	CTD-2293H3.2	19	37566015	37569507	-1	antisense	NA	NA	NA	NA	7	15.65	6.15e-05	rs528504	52
ENSG00000267672	CTD-2293H3.1	19	37582243	37583466	1	sense_intronic	NA	NA	NA	NA	9	6.144	6.15e-05	rs528504	52
ENSG00000267360	CTC-454I21.3	19	37583921	37701414	-1	protein_coding	NA	NA	NA	NA	52	13.04	5.23e-06	rs528504	52
ENSG00000196967	ZNF585A	19	37597636	37663643	-1	protein_coding	199704	ZNF585A	0.711327	0.518767	35	7.582	1.28e-05	rs528504	52
ENSG00000267437	CTC-454I21.4	19	37619581	37632542	-1	antisense	NA	NA	NA	NA	12	4.17	5.41e-05	rs528504	52
ENSG00000245680	ZNF585B	19	37672481	37709055	-1	protein_coding	92285	ZNF585B	0.00569167	-0.572054	15	13.04	5.23e-06	rs528504	52
ENSG00000188283	ZNF383	19	37708828	37734828	1	protein_coding	163087	ZNF383	6.28e-08	-0.785558	3	7.203	0.000339	rs528504	52
ENSG00000226686	AC012309.5	19	37742814	37756437	1	lincRNA	101927667	LINC01535	NA	NA	1	7.203	0.004868	rs528504	52
ENSG00000181666	HKR1	19	37803739	37860267	1	protein_coding	284459	HKR1	2.72e-10	-0.700981	2	6.089	0.0002015	rs528504	52
ENSG00000064655	EYA2	20	45523263	45817492	1	protein_coding	2139	EYA2	0.335504	NA	3	2.688	5.41e-05	rs6063085	53
ENSG00000215450	RP5-890O15.3	20	45789477	45790339	-1	pseudogene	NA	NA	NA	NA	1	2.688	5.41e-05	rs6063085	53
ENSG00000264901	MIR3616	20	45795609	45795700	1	miRNA	100500814	MIR3616	NA	NA	1	2.688	5.41e-05	rs6063085	53
ENSG00000101040	ZMYND8	20	45837859	45985567	-1	protein_coding	23613	ZMYND8	0.999997	-0.191179	5	5.826	3.78e-08	rs6063085	53
ENSG00000235374	SSR4P1	21	46491648	46494080	-1	pseudogene	728039	SSR4P1	NA	NA	4	11.44	1.28e-09	rs2838788	54
ENSG00000268856	AP001579.1	21	46492796	46492927	-1	protein_coding	NA	NA	NA	NA	4	11.44	1.28e-09	rs2838788	54
ENSG00000197381	ADARB1	21	46493768	46646478	1	protein_coding	104	ADARB1	0.843939	0.941077	13	11.44	1.22e-09	rs2838788	54
ENSG00000268805	PRED57	21	46511596	46515493	-1	protein_coding	728039	SSR4P1	NA	NA	1	11.44	1.28e-09	rs2838788	54
ENSG00000267857	PRED58	21	46520728	46534873	-1	protein_coding	NA	NA	NA	NA	1	2.615	1.22e-09	rs2838788	54

## Sheet: Table S8
Supplementary Table S8. Results from eQTL mapping (54 tissue types)
ensg	symbol	chr	start	end	strand	type	entrezID	HUGO	pLI	ncRVIS	eqtlMapSNPs	eqtlMapminP	eqtlMapminQ	eqtlMapts	eqtlDirection	minGwasP	IndSigSNPs	GenomicLocus
ENSG00000173406	DAB1	1	57460451	59012406	-1	protein_coding	1600	DAB1	0.981409	-0.32808	31	9.88e-09	7.81e-12	GTEx/v8/Brain_Cerebellar_Hemisphere:GTEx/v8/Brain_Cerebellum	NA	3.77e-09	rs12405761	1
ENSG00000227935	RP6-102O10.1	1	57852248	57853122	1	lincRNA	NA	NA	NA	NA	39	1.87e-10	5.36e-11	GTEx/v8/Brain_Cerebellar_Hemisphere:GTEx/v8/Brain_Cerebellum	NA	3.77e-09	rs12405761	1
ENSG00000172260	NEGR1	1	71861623	72748417	-1	protein_coding	257194	NEGR1	0.951349	-1.71358	136	1.04e-08	8.98e-10	GTEx/v8/Adipose_Visceral_Omentum:GTEx/v8/Brain_Caudate_basal_ganglia:GTEx/v8/Brain_Nucleus_accumbens_basal_ganglia:GTEx/v8/Brain_Putamen_basal_ganglia:GTEx/v8/Colon_Sigmoid:GTEx/v8/Esophagus_Muscularis:GTEx/v8/Lung:GTEx/v8/Nerve_Tibial	NA	3.64e-12	rs2126077;rs2815752;rs2815757;rs782202;rs4649956	2
ENSG00000227207	RPL31P12	1	72767155	72767512	1	pseudogene	100270887	RPL31P12	NA	NA	155	6.74e-47	1.23e-38	GTEx/v8/Brain_Cerebellar_Hemisphere:GTEx/v8/Brain_Cerebellum	NA	3.64e-12	rs2126077;rs2815757;rs2815752;rs782202;rs4649956	2
ENSG00000233973	RP4-598G3.1	1	73771853	73820934	1	lincRNA	101927295	LINC01360	NA	NA	498	5.63e-81	1.32e-69	GTEx/v8/Testis	NA	1.97e-08	rs35641559;rs17570390;rs4593766	3
ENSG00000267272	LINC01140	1	87595448	87634881	1	lincRNA	339524	LINC01140	NA	NA	83	1.19e-06	9.34e-09	GTEx/v8/Adipose_Subcutaneous	NA	4.8e-08	rs78826028	4
ENSG00000134369	NAV1	1	201592411	201796102	1	protein_coding	89796	NAV1	1	-1.02397	2	3.83e-05	0.00015389	GTEx/v8/Nerve_Tibial	NA	3.85e-09	rs7551784;rs11577900;rs2279681	5
ENSG00000198700	IPO9	1	201798269	201853422	1	protein_coding	55705	IPO9	0.999992	3.33395	22	5.23e-06	0.00428953	GTEx/v8/Artery_Aorta:GTEx/v8/Artery_Tibial:GTEx/v8/Brain_Cerebellar_Hemisphere:GTEx/v8/Pituitary	NA	2.1e-09	rs7551784;rs2494112;rs2644109;rs11577900;rs2279681	5
ENSG00000198892	SHISA4	1	201857808	201861434	1	protein_coding	149345	SHISA4	0.00107148	0.256183	98	9.35e-50	8.63e-69	GTEx/v8/Adipose_Subcutaneous:GTEx/v8/Adipose_Visceral_Omentum:GTEx/v8/Brain_Cortex:GTEx/v8/Brain_Nucleus_accumbens_basal_ganglia:GTEx/v8/Breast_Mammary_Tissue:GTEx/v8/Colon_Sigmoid:GTEx/v8/Colon_Transverse:GTEx/v8/Esophagus_Gastroesophageal_Junction:GTEx/v8/Esophagus_Mucosa:GTEx/v8/Esophagus_Muscularis:GTEx/v8/Liver:GTEx/v8/Lung:GTEx/v8/Nerve_Tibial:GTEx/v8/Cells_Cultured_fibroblasts:GTEx/v8/Skin…	NA	1.28e-10	rs7551784;rs2494112;rs2279681;rs11577900;rs2644109	5
ENSG00000163431	LMOD1	1	201865580	201915715	-1	protein_coding	25802	LMOD1	0.790873	-0.0854091	92	6.48e-29	4.89e-23	GTEx/v8/Adipose_Subcutaneous:GTEx/v8/Adipose_Visceral_Omentum:GTEx/v8/Artery_Aorta:GTEx/v8/Artery_Tibial:GTEx/v8/Brain_Frontal_Cortex_BA9:GTEx/v8/Brain_Nucleus_accumbens_basal_ganglia:GTEx/v8/Breast_Mammary_Tissue:GTEx/v8/Colon_Sigmoid:GTEx/v8/Colon_Transverse:GTEx/v8/Esophagus_Mucosa:GTEx/v8/Esophagus_Muscularis:GTEx/v8/Heart_Atrial_Appendage:GTEx/v8/Lung:GTEx/v8/Muscle_Skeletal:GTEx/v8/Nerve_Ti…	NA	1.28e-10	rs7551784;rs2494112;rs2279681;rs2644109;rs11577900	5
ENSG00000134375	TIMM17A	1	201924619	201939789	1	protein_coding	10440	TIMM17A	0.243778	-0.217287	61	8.2e-08	1.2e-69	GTEx/v8/Artery_Tibial:GTEx/v8/Esophagus_Gastroesophageal_Junction	NA	1.57e-09	rs2494112;rs2279681;rs2644109	5
ENSG00000176393	RNPEP	1	201951500	201975275	1	protein_coding	6051	RNPEP	4.81e-11	0.255145	60	2.35e-06	2.88e-26	GTEx/v8/Esophagus_Mucosa:GTEx/v8/Muscle_Skeletal:GTEx/v8/Nerve_Tibial:GTEx/v8/Cells_Cultured_fibroblasts	NA	1.28e-10	rs2644109;rs2494112;rs7551784;rs2279681	5
ENSG00000143499	SMYD2	1	214454445	214510474	1	protein_coding	56950	SMYD2	0.00536894	NA	3	1.4e-05	4.72e-13	GTEx/v8/Thyroid	NA	1.37e-06	rs12125521	6
ENSG00000152104	PTPN14	1	214522039	214725792	-1	protein_coding	5784	PTPN14	0.991959	2.64314	7	1.75e-05	1.97e-12	GTEx/v8/Nerve_Tibial	NA	4.4e-08	rs12125521	6
ENSG00000028116	VRK2	2	58134786	58387055	1	protein_coding	7444	VRK2	1.22e-08	-0.188348	83	2e-05	1.9e-10	GTEx/v8/Whole_Blood:GTEx/v8/Artery_Tibial:GTEx/v8/Nerve_Tibial:GTEx/v8/Spleen	NA	6.6e-12	rs112011984	8
ENSG00000143995	MEIS1	2	66660584	66801001	1	protein_coding	4211	MEIS1	0.990885	-1.50087	1	1.5e-05	0.00110789	GTEx/v8/Heart_Left_Ventricle	NA	4.31e-08	rs6735071	9
ENSG00000125637	PSD4	2	113914902	113966973	1	protein_coding	23550	PSD4	0.805496	-0.981758	18	8.77e-07	3.97e-48	GTEx/v8/Lung	NA	1.29e-09	rs62158206	10
ENSG00000189223	PAX8-AS1	2	113969099	114034158	1	processed_transcript	654433	PAX8-AS1	NA	NA	7	0.00011334	1.46e-68	GTEx/v8/Skin_Sun_Exposed_Lower_leg	NA	2.07e-07	rs62158206	10
ENSG00000125618	PAX8	2	113973574	114036527	-1	protein_coding	7849	PAX8	0.902124	0.0786982	3	0.00020292	4.02e-51	GTEx/v8/Skin_Sun_Exposed_Lower_leg	NA	2.07e-07	rs62158206	10
ENSG00000231292	IGKV1OR2-108	2	114163973	114164486	1	IG_V_gene	28862	IGKV1OR2-108	NA	NA	23	2.34e-20	9.43e-16	GTEx/v8/Skin_Not_Sun_Exposed_Suprapubic:GTEx/v8/Thyroid	NA	1.29e-09	rs62158206	10
ENSG00000234997	AC016745.3	2	114182072	114182901	1	antisense	NA	NA	NA	NA	23	4.89e-72	2.06e-62	GTEx/v8/Adipose_Subcutaneous:GTEx/v8/Adrenal_Gland:GTEx/v8/Lung:GTEx/v8/Cells_Cultured_fibroblasts:GTEx/v8/Skin_Not_Sun_Exposed_Suprapubic:GTEx/v8/Skin_Sun_Exposed_Lower_leg:GTEx/v8/Thyroid	NA	1.29e-09	rs62158206	10
ENSG00000272563	RP11-480C16.1	2	114190177	114193619	1	lincRNA	NA	NA	NA	NA	23	2.09e-60	2.52e-51	GTEx/v8/Adrenal_Gland:GTEx/v8/Lung:GTEx/v8/Pituitary:GTEx/v8/Skin_Not_Sun_Exposed_Suprapubic:GTEx/v8/Skin_Sun_Exposed_Lower_leg:GTEx/v8/Thyroid	NA	1.29e-09	rs62158206	10
ENSG00000136682	CBWD2	2	114195268	114253766	1	protein_coding	150472	CBWD2	0.967071	-0.830177	23	1.09e-22	9.56e-18	GTEx/v8/Adrenal_Gland:GTEx/v8/Esophagus_Mucosa:GTEx/v8/Esophagus_Muscularis:GTEx/v8/Muscle_Skeletal:GTEx/v8/Skin_Not_Sun_Exposed_Suprapubic:GTEx/v8/Skin_Sun_Exposed_Lower_leg:GTEx/v8/Thyroid	NA	1.29e-09	rs62158206	10
ENSG00000184492	FOXD4L1	2	114256661	114258728	1	protein_coding	200350	FOXD4L1	NA	0.335378	23	4.7e-18	1.04e-13	GTEx/v8/Adrenal_Gland:GTEx/v8/Skin_Not_Sun_Exposed_Suprapubic:GTEx/v8/Thyroid	NA	1.29e-09	rs62158206	10
ENSG00000240356	RPL23AP7	2	114368079	114384667	-1	pseudogene	118433	RPL23AP7	NA	NA	5	5.55e-05	9.79e-101	GTEx/v8/Artery_Tibial:GTEx/v8/Lung	NA	8.08e-09	rs62158206	10
ENSG00000136732	GYPC	2	127413509	127454246	1	protein_coding	2995	GYPC	0.0138698	-0.582197	102	4.56e-06	4.71e-26	GTEx/v8/Heart_Atrial_Appendage:GTEx/v8/Cells_Cultured_fibroblasts	NA	6.66e-08	rs360241	11
ENSG00000187699	C2orf88	2	190744335	191068210	1	protein_coding	84281	C2orf88	0.0235885	-0.923407	13	3.38e-11	1.93e-41	GTEx/v8/Whole_Blood:GTEx/v8/Cells_Cultured_fibroblasts	NA	3.36e-09	rs4577309	12
ENSG00000138379	MSTN	2	190920423	190927455	-1	protein_coding	2660	MSTN	0.812915	0.5792	1	4.36e-05	0.0085135	GTEx/v8/Artery_Tibial	NA	3.36e-09	rs4577309	12
ENSG00000151689	INPP1	2	191208196	191236391	1	protein_coding	3628	INPP1	0.000237352	NA	13	4.27e-11	1.22e-38	GTEx/v8/Adipose_Subcutaneous:GTEx/v8/Brain_Cerebellar_Hemisphere:GTEx/v8/Brain_Cerebellum:GTEx/v8/Brain_Cortex:GTEx/v8/Colon_Transverse:GTEx/v8/Esophagus_Mucosa:GTEx/v8/Esophagus_Muscularis:GTEx/v8/Nerve_Tibial:GTEx/v8/Pituitary:GTEx/v8/Skin_Sun_Exposed_Lower_leg:GTEx/v8/Thyroid	NA	3.36e-09	rs4577309	12
ENSG00000151690	MFSD6	2	191273081	191373931	1	protein_coding	54842	MFSD6	0.00184669	-0.109789	13	2.7e-24	6.7e-46	GTEx/v8/Cells_EBV-transformed_lymphocytes:GTEx/v8/Whole_Blood:GTEx/v8/Artery_Aorta:GTEx/v8/Brain_Cerebellar_Hemisphere:GTEx/v8/Brain_Cerebellum:GTEx/v8/Nerve_Tibial:GTEx/v8/Cells_Cultured_fibroblasts:GTEx/v8/Stomach:GTEx/v8/Thyroid	NA	3.36e-09	rs4577309	12
ENSG00000272979	RP11-647K16.1	2	191318818	191319247	-1	antisense	NA	NA	NA	NA	13	9.34e-10	6.57e-18	GTEx/v8/Adipose_Subcutaneous:GTEx/v8/Artery_Tibial:GTEx/v8/Breast_Mammary_Tissue:GTEx/v8/Skin_Not_Sun_Exposed_Suprapubic:GTEx/v8/Skin_Sun_Exposed_Lower_leg:GTEx/v8/Testis:GTEx/v8/Thyroid	NA	3.36e-09	rs4577309	12
ENSG00000189362	TMEM194B	2	191369068	191399448	-1	protein_coding	100131211	TMEM194B	NA	-0.209502	13	1.02e-15	5.62e-41	GTEx/v8/Adipose_Subcutaneous:GTEx/v8/Adipose_Visceral_Omentum:GTEx/v8/Whole_Blood:GTEx/v8/Artery_Aorta:GTEx/v8/Artery_Tibial:GTEx/v8/Esophagus_Mucosa:GTEx/v8/Heart_Atrial_Appendage:GTEx/v8/Minor_Salivary_Gland:GTEx/v8/Cells_Cultured_fibroblasts:GTEx/v8/Testis	NA	3.36e-09	rs4577309	12
ENSG00000233654	AC093388.3	2	191399581	191432828	1	antisense	NA	NA	NA	NA	12	2.47e-06	2.25e-13	GTEx/v8/Esophagus_Mucosa:GTEx/v8/Cells_Cultured_fibroblasts:GTEx/v8/Thyroid	NA	6.82e-09	rs4577309	12
ENSG00000138386	NAB1	2	191511472	191557492	1	protein_coding	4664	NAB1	0.848508	-1.33616	13	2.65e-18	1.25e-29	GTEx/v8/Artery_Aorta:GTEx/v8/Artery_Tibial:GTEx/v8/Esophagus_Mucosa:GTEx/v8/Muscle_Skeletal	NA	3.36e-09	rs4577309	12
ENSG00000115419	GLS	2	191745553	191830278	1	protein_coding	2744	GLS	0.999303	-0.163004	1	2.44e-05	4.5e-42	GTEx/v8/Esophagus_Mucosa:GTEx/v8/Muscle_Skeletal:GTEx/v8/Nerve_Tibial:GTEx/v8/Skin_Not_Sun_Exposed_Suprapubic	NA	3.36e-09	rs4577309	12
ENSG00000115415	STAT1	2	191829084	191885686	-1	protein_coding	6772	STAT1	0.999994	-0.650494	1	0.00018553	0.0324073	GTEx/v8/Skin_Sun_Exposed_Lower_leg	NA	0.01794	rs4577309	12
ENSG00000118263	KLF7	2	207938861	208031991	-1	protein_coding	8609	KLF7	0.929931	-2.11539	42	3.67e-17	2.29e-13	GTEx/v8/Muscle_Skeletal:GTEx/v8/Testis	NA	3.04e-08	rs58942037	13
ENSG00000234902	AC007879.2	2	208051441	208100790	-1	lincRNA	NA	NA	NA	NA	42	2.2e-12	1.29e-18	GTEx/v8/Adipose_Subcutaneous:GTEx/v8/Nerve_Tibial:GTEx/v8/Cells_Cultured_fibroblasts:GTEx/v8/Testis	NA	3.04e-08	rs58942037	13
ENSG00000225916	AC007879.4	2	208091673	208093032	1	lincRNA	NA	NA	NA	NA	42	1.22e-09	7.22e-12	GTEx/v8/Testis	NA	3.04e-08	rs58942037	13
ENSG00000174453	VWC2L	2	215275789	215443683	1	protein_coding	402117	VWC2L	0.612118	-1.05683	87	1.42e-05	0.0156105	GTEx/v8/Testis	NA	2.26e-08	rs137959292	14
ENSG00000164045	CDC25A	3	48198636	48229892	-1	protein_coding	993	CDC25A	0.979698	-0.724001	80	7.45e-07	1.64e-73	GTEx/v8/Adipose_Subcutaneous:GTEx/v8/Artery_Tibial:GTEx/v8/Brain_Cerebellar_Hemisphere:GTEx/v8/Muscle_Skeletal:GTEx/v8/Pancreas:GTEx/v8/Stomach:GTEx/v8/Thyroid	NA	1.28e-11	rs10865954;rs7617480	15
ENSG00000164048	ZNF589	3	48282590	48340743	1	protein_coding	51385	ZNF589	6.5e-07	-0.372176	92	9.3e-07	9.7e-124	GTEx/v8/Adipose_Subcutaneous:GTEx/v8/Adrenal_Gland:GTEx/v8/Whole_Blood:GTEx/v8/Artery_Aorta:GTEx/v8/Artery_Tibial:GTEx/v8/Breast_Mammary_Tissue:GTEx/v8/Esophagus_Gastroesophageal_Junction:GTEx/v8/Esophagus_Mucosa:GTEx/v8/Esophagus_Muscularis:GTEx/v8/Heart_Atrial_Appendage:GTEx/v8/Heart_Left_Ventricle:GTEx/v8/Nerve_Tibial:GTEx/v8/Skin_Not_Sun_Exposed_Suprapubic:GTEx/v8/Skin_Sun_Exposed_Lower_leg:G…	NA	1.95e-10	rs10865954;rs7617480	15
ENSG00000229759	MRPS18AP1	3	48297840	48298428	-1	pseudogene	359761	MRPS18AP1	NA	NA	99	1.47e-08	5.3e-85	GTEx/v8/Adipose_Subcutaneous:GTEx/v8/Whole_Blood:GTEx/v8/Artery_Tibial:GTEx/v8/Brain_Cerebellum:GTEx/v8/Brain_Spinal_cord_cervical_c-1:GTEx/v8/Breast_Mammary_Tissue:GTEx/v8/Esophagus_Gastroesophageal_Junction:GTEx/v8/Esophagus_Mucosa:GTEx/v8/Esophagus_Muscularis:GTEx/v8/Heart_Atrial_Appendage:GTEx/v8/Lung:GTEx/v8/Muscle_Skeletal:GTEx/v8/Nerve_Tibial:GTEx/v8/Pancreas:GTEx/v8/Prostate:GTEx/v8/Cells…	NA	1.28e-11	rs10865954;rs7617480	15
ENSG00000228638	FCF1P2	3	48332283	48332865	-1	pseudogene	101060195	FCF1P2	NA	NA	70	2.72e-05	9.89e-18	GTEx/v8/Adipose_Subcutaneous:GTEx/v8/Whole_Blood:GTEx/v8/Artery_Aorta:GTEx/v8/Thyroid	NA	4.9e-06	rs10865954;rs7617480	15
ENSG00000172113	NME6	3	48334754	48343175	-1	protein_coding	10201	NME6	9.22e-05	-0.182941	86	6.41e-07	6.62e-54	GTEx/v8/Adipose_Subcutaneous:GTEx/v8/Whole_Blood:GTEx/v8/Artery_Aorta:GTEx/v8/Esophagus_Muscularis:GTEx/v8/Muscle_Skeletal:GTEx/v8/Cells_Cultured_fibroblasts:GTEx/v8/Skin_Sun_Exposed_Lower_leg:GTEx/v8/Thyroid	NA	1.97e-11	rs10865954;rs7617480	15
ENSG00000164049	FBXW12	3	48413709	48442666	1	protein_coding	285231	FBXW12	1.97e-07	0.783335	14	0.0001623	2.97e-11	GTEx/v8/Testis	NA	1.79e-08	rs7617480	15
ENSG00000164050	PLXNB1	3	48445261	48471594	-1	protein_coding	5364	PLXNB1	0.850195	NA	11	0.00021017	0.0352471	GTEx/v8/Muscle_Skeletal	NA	5.71e-11	rs10865954;rs7617480	15
ENSG00000232112	TMA7	3	48481667	48485616	1	protein_coding	51372	TMA7	0.0100073	0.321268	73	3.97e-16	2.61e-109	GTEx/v8/Brain_Cerebellar_Hemisphere:GTEx/v8/Brain_Cerebellum:GTEx/v8/Brain_Cortex:GTEx/v8/Muscle_Skeletal:GTEx/v8/Skin_Sun_Exposed_Lower_leg:GTEx/v8/Testis	NA	1.28e-11	rs7617480;rs10865954	15
ENSG00000164053	ATRIP	3	48488114	48507115	1	protein_coding	84126	ATRIP	0.00148698	NA	143	3.77e-08	1.91e-31	GTEx/v8/Whole_Blood:GTEx/v8/Artery_Tibial:GTEx/v8/Esophagus_Mucosa:GTEx/v8/Muscle_Skeletal:GTEx/v8/Nerve_Tibial:GTEx/v8/Skin_Not_Sun_Exposed_Suprapubic:GTEx/v8/Skin_Sun_Exposed_Lower_leg	NA	1.28e-11	rs10865954;rs7617480	15
ENSG00000213689	TREX1	3	48506445	48509044	1	protein_coding	11277	TREX1	0.0933407	-0.110328	141	2.54e-12	9.32e-79	GTEx/v8/Adipose_Subcutaneous:GTEx/v8/Adipose_Visceral_Omentum:GTEx/v8/Whole_Blood:GTEx/v8/Artery_Aorta:GTEx/v8/Artery_Tibial:GTEx/v8/Brain_Caudate_basal_ganglia:GTEx/v8/Breast_Mammary_Tissue:GTEx/v8/Colon_Sigmoid:GTEx/v8/Colon_Transverse:GTEx/v8/Esophagus_Mucosa:GTEx/v8/Esophagus_Muscularis:GTEx/v8/Heart_Left_Ventricle:GTEx/v8/Muscle_Skeletal:GTEx/v8/Nerve_Tibial:GTEx/v8/Pancreas:GTEx/v8/Prostate…	NA	1.28e-11	rs7617480;rs10865954	15
ENSG00000164054	SHISA5	3	48509197	48542259	-1	protein_coding	51246	SHISA5	9.94e-08	-0.44203	155	1.39e-05	2.58e-10	GTEx/v8/Muscle_Skeletal:GTEx/v8/Cells_Cultured_fibroblasts:GTEx/v8/Skin_Not_Sun_Exposed_Suprapubic:GTEx/v8/Skin_Sun_Exposed_Lower_leg	NA	5.71e-11	rs7617480;rs10865954	15
ENSG00000145040	UCN2	3	48599160	48601206	-1	protein_coding	90226	UCN2	0.157236	0.00632674	1	0.00014568	0.00573708	GTEx/v8/Brain_Cerebellum	NA	0.002491	rs10865954	15
ENSG00000183396	TMEM89	3	48658192	48659288	-1	protein_coding	440955	TMEM89	0.711076	-0.325142	26	6.73e-05	3.41e-24	GTEx/v8/Artery_Tibial	NA	6.11e-10	rs7617480;rs2029591	15
ENSG00000225697	SLC26A6	3	48663156	48672926	-1	protein_coding	65010	SLC26A6	3.31e-05	-0.384056	80	1.44e-12	4.21e-27	GTEx/v8/Adipose_Subcutaneous:GTEx/v8/Lung:GTEx/v8/Muscle_Skeletal:GTEx/v8/Thyroid	NA	1.28e-11	rs10865954	15
ENSG00000008300	CELSR3	3	48673902	48700348	-1	protein_coding	1951	CELSR3	0.999656	-0.878908	187	1.06e-07	6.76e-05	GTEx/v8/Adipose_Subcutaneous:GTEx/v8/Artery_Aorta:GTEx/v8/Artery_Tibial:GTEx/v8/Colon_Transverse:GTEx/v8/Muscle_Skeletal	NA	1.28e-11	rs10865954;rs7617480;rs2029591	15
ENSG00000213672	NCKIPSD	3	48701364	48723797	-1	protein_coding	51517	NCKIPSD	0.00713136	-0.551018	201	2.47e-78	1.47e-68	GTEx/v8/Adipose_Subcutaneous:GTEx/v8/Adipose_Visceral_Omentum:GTEx/v8/Adrenal_Gland:GTEx/v8/Whole_Blood:GTEx/v8/Artery_Aorta:GTEx/v8/Artery_Coronary:GTEx/v8/Artery_Tibial:GTEx/v8/Brain_Amygdala:GTEx/v8/Brain_Anterior_cingulate_cortex_BA24:GTEx/v8/Brain_Caudate_basal_ganglia:GTEx/v8/Brain_Cerebellar_Hemisphere:GTEx/v8/Brain_Cerebellum:GTEx/v8/Brain_Cortex:GTEx/v8/Brain_Frontal_Cortex_BA9:GTEx/v8/B…	NA	1.28e-11	rs10865954;rs7617480;rs2029591	15
ENSG00000271973	RP11-572O6.1	3	48709888	48710166	1	lincRNA	NA	NA	NA	NA	5	0.00017992	0.0354439	GTEx/v8/Artery_Tibial	NA	0.001535	rs10865954	15
ENSG00000068745	IP6K2	3	48725436	48777786	-1	protein_coding	51447	IP6K2	0.989458	-0.392799	81	2.28e-09	8.46e-35	GTEx/v8/Artery_Aorta:GTEx/v8/Artery_Tibial:GTEx/v8/Pancreas:GTEx/v8/Cells_Cultured_fibroblasts:GTEx/v8/Skin_Not_Sun_Exposed_Suprapubic:GTEx/v8/Thyroid	NA	1.28e-11	rs10865954;rs4688760	15
ENSG00000114302	PRKAR2A	3	48782030	48885279	-1	protein_coding	5576	PRKAR2A	0.983251	-2.8684	226	6.15e-07	0.00028016	GTEx/v8/Adipose_Subcutaneous:GTEx/v8/Adipose_Visceral_Omentum:GTEx/v8/Artery_Tibial:GTEx/v8/Brain_Substantia_nigra:GTEx/v8/Colon_Sigmoid:GTEx/v8/Esophagus_Muscularis:GTEx/v8/Heart_Atrial_Appendage:GTEx/v8/Muscle_Skeletal:GTEx/v8/Nerve_Tibial:GTEx/v8/Cells_Cultured_fibroblasts	NA	1.28e-11	rs10865954;rs7617480;rs2029591	15
ENSG00000224424	PRKAR2A-AS1	3	48885005	48889414	1	antisense	100506637	PRKAR2A-AS1	NA	NA	9	0.0002346	0.0107756	GTEx/v8/Skin_Sun_Exposed_Lower_leg	NA	9.55e-05	rs10865954	15
ENSG00000177479	ARIH2	3	48956254	49023815	1	protein_coding	10425	ARIH2	0.987412	-1.69992	229	2.88e-28	1.97e-22	GTEx/v8/Adipose_Subcutaneous:GTEx/v8/Adipose_Visceral_Omentum:GTEx/v8/Adrenal_Gland:GTEx/v8/Whole_Blood:GTEx/v8/Artery_Aorta:GTEx/v8/Artery_Tibial:GTEx/v8/Breast_Mammary_Tissue:GTEx/v8/Colon_Transverse:GTEx/v8/Esophagus_Gastroesophageal_Junction:GTEx/v8/Esophagus_Mucosa:GTEx/v8/Heart_Atrial_Appendage:GTEx/v8/Heart_Left_Ventricle:GTEx/v8/Liver:GTEx/v8/Lung:GTEx/v8/Nerve_Tibial:GTEx/v8/Pancreas:GTE…	NA	1.28e-11	rs10865954;rs7617480;rs2029591	15
ENSG00000235236	RP13-131K19.1	3	49017351	49021418	-1	antisense	NA	NA	NA	NA	1	0.00029212	0.0151827	GTEx/v8/Heart_Left_Ventricle	NA	2.5e-10	rs4688760	15
ENSG00000178467	P4HTM	3	49027319	49044587	1	protein_coding	54681	P4HTM	0.0232749	NA	229	1.26e-29	9.91e-24	GTEx/v8/Adipose_Subcutaneous:GTEx/v8/Adipose_Visceral_Omentum:GTEx/v8/Adrenal_Gland:GTEx/v8/Whole_Blood:GTEx/v8/Artery_Aorta:GTEx/v8/Artery_Tibial:GTEx/v8/Brain_Caudate_basal_ganglia:GTEx/v8/Brain_Cerebellar_Hemisphere:GTEx/v8/Brain_Cerebellum:GTEx/v8/Brain_Cortex:GTEx/v8/Brain_Frontal_Cortex_BA9:GTEx/v8/Brain_Hippocampus:GTEx/v8/Brain_Hypothalamus:GTEx/v8/Brain_Nucleus_accumbens_basal_ganglia:GT…	NA	1.28e-11	rs10865954;rs7617480;rs2029591	15
ENSG00000178252	WDR6	3	49044495	49053386	1	protein_coding	11180	WDR6	9.2e-07	-0.0589495	336	4.73e-145	2.37e-124	GTEx/v8/Adipose_Subcutaneous:GTEx/v8/Adipose_Visceral_Omentum:GTEx/v8/Adrenal_Gland:GTEx/v8/Cells_EBV-transformed_lymphocytes:GTEx/v8/Whole_Blood:GTEx/v8/Artery_Aorta:GTEx/v8/Artery_Coronary:GTEx/v8/Artery_Tibial:GTEx/v8/Brain_Amygdala:GTEx/v8/Brain_Caudate_basal_ganglia:GTEx/v8/Brain_Cerebellar_Hemisphere:GTEx/v8/Brain_Cerebellum:GTEx/v8/Brain_Cortex:GTEx/v8/Brain_Frontal_Cortex_BA9:GTEx/v8/Brai…	NA	1.28e-11	rs10865954;rs7617480;rs2029591;rs6446187;rs3774750;rs4688760	15
ENSG00000178149	DALRD3	3	49052921	49059726	-1	protein_coding	55152	DALRD3	1.85e-05	0.0723068	229	5.14e-29	2.14e-23	GTEx/v8/Adipose_Subcutaneous:GTEx/v8/Adipose_Visceral_Omentum:GTEx/v8/Artery_Aorta:GTEx/v8/Artery_Coronary:GTEx/v8/Artery_Tibial:GTEx/v8/Brain_Cerebellar_Hemisphere:GTEx/v8/Brain_Cerebellum:GTEx/v8/Brain_Cortex:GTEx/v8/Brain_Frontal_Cortex_BA9:GTEx/v8/Breast_Mammary_Tissue:GTEx/v8/Colon_Transverse:GTEx/v8/Esophagus_Gastroesophageal_Junction:GTEx/v8/Esophagus_Mucosa:GTEx/v8/Esophagus_Muscularis:GT…	NA	1.28e-11	rs10865954;rs7617480;rs2029591	15
ENSG00000178057	NDUFAF3	3	49057892	49060928	1	protein_coding	25915	NDUFAF3	4.86e-05	-2.09007	195	2.5e-08	9.02e-06	GTEx/v8/Adipose_Subcutaneous:GTEx/v8/Artery_Aorta:GTEx/v8/Artery_Tibial:GTEx/v8/Esophagus_Gastroesophageal_Junction:GTEx/v8/Esophagus_Muscularis:GTEx/v8/Heart_Atrial_Appendage:GTEx/v8/Heart_Left_Ventricle:GTEx/v8/Lung:GTEx/v8/Muscle_Skeletal:GTEx/v8/Nerve_Tibial:GTEx/v8/Cells_Cultured_fibroblasts:GTEx/v8/Skin_Not_Sun_Exposed_Suprapubic:GTEx/v8/Thyroid:GTEx/v8/Vagina	NA	1.28e-11	rs10865954;rs7617480;rs2029591	15
ENSG00000178035	IMPDH2	3	49061758	49066841	-1	protein_coding	3615	IMPDH2	0.00135317	-0.509343	51	5.23e-05	0.0116736	GTEx/v8/Cells_Cultured_fibroblasts	NA	2.9e-10	rs2029591;rs7617480	15
ENSG00000272434	RP13-131K19.6	3	49066749	49067139	1	antisense	NA	NA	NA	NA	181	7.07e-14	9.59e-10	GTEx/v8/Adipose_Subcutaneous:GTEx/v8/Artery_Tibial:GTEx/v8/Breast_Mammary_Tissue:GTEx/v8/Colon_Sigmoid:GTEx/v8/Esophagus_Gastroesophageal_Junction:GTEx/v8/Esophagus_Muscularis:GTEx/v8/Nerve_Tibial:GTEx/v8/Thyroid	NA	1.28e-11	rs7617480;rs10865954;rs2029591	15
ENSG00000198218	QRICH1	3	49067140	49131796	-1	protein_coding	54870	QRICH1	0.99607	-0.279294	230	1.34e-23	6.94e-21	GTEx/v8/Adipose_Subcutaneous:GTEx/v8/Adipose_Visceral_Omentum:GTEx/v8/Adrenal_Gland:GTEx/v8/Whole_Blood:GTEx/v8/Artery_Aorta:GTEx/v8/Artery_Coronary:GTEx/v8/Artery_Tibial:GTEx/v8/Brain_Caudate_basal_ganglia:GTEx/v8/Brain_Cerebellar_Hemisphere:GTEx/v8/Brain_Cerebellum:GTEx/v8/Brain_Cortex:GTEx/v8/Brain_Nucleus_accumbens_basal_ganglia:GTEx/v8/Breast_Mammary_Tissue:GTEx/v8/Colon_Sigmoid:GTEx/v8/Colo…	NA	1.28e-11	rs10865954;rs7617480;rs2029591;rs4688760	15
ENSG00000172046	USP19	3	49145479	49158371	-1	protein_coding	10869	USP19	0.999992	-0.429633	75	3.26e-05	0.0118672	GTEx/v8/Muscle_Skeletal:GTEx/v8/Testis	NA	1.28e-11	rs10865954	15
ENSG00000172037	LAMB2	3	49158547	49170551	-1	protein_coding	3913	LAMB2	7.45e-11	-0.451082	19	2.95e-05	0.00032934	GTEx/v8/Whole_Blood:GTEx/v8/Muscle_Skeletal	NA	1.28e-11	rs10865954;rs7617480	15
ENSG00000270441	RP11-694I15.7	3	49177519	49198284	-1	pseudogene	NA	NA	NA	NA	228	2.28e-07	0.00034489	GTEx/v8/Artery_Tibial:GTEx/v8/Brain_Cerebellar_Hemisphere:GTEx/v8/Brain_Cerebellum:GTEx/v8/Brain_Cortex:GTEx/v8/Brain_Substantia_nigra:GTEx/v8/Esophagus_Gastroesophageal_Junction:GTEx/v8/Esophagus_Muscularis:GTEx/v8/Lung:GTEx/v8/Nerve_Tibial:GTEx/v8/Pancreas:GTEx/v8/Skin_Not_Sun_Exposed_Suprapubic:GTEx/v8/Thyroid	NA	1.28e-11	rs10865954;rs7617480;rs2029591	15
ENSG00000177352	CCDC71	3	49199968	49203754	-1	protein_coding	64925	CCDC71	0.0169896	NA	199	9.42e-20	4.03e-15	GTEx/v8/Adipose_Subcutaneous:GTEx/v8/Whole_Blood:GTEx/v8/Brain_Amygdala:GTEx/v8/Brain_Caudate_basal_ganglia:GTEx/v8/Brain_Cerebellar_Hemisphere:GTEx/v8/Brain_Cerebellum:GTEx/v8/Brain_Cortex:GTEx/v8/Brain_Frontal_Cortex_BA9:GTEx/v8/Brain_Hippocampus:GTEx/v8/Brain_Nucleus_accumbens_basal_ganglia:GTEx/v8/Brain_Putamen_basal_ganglia:GTEx/v8/Breast_Mammary_Tissue:GTEx/v8/Lung:GTEx/v8/Nerve_Tibial:GTEx…	NA	1.28e-11	rs7617480;rs10865954;rs2029591	15
ENSG00000185909	KLHDC8B	3	49209044	49213917	1	protein_coding	200942	KLHDC8B	0.0104214	-0.0773522	272	3.12e-25	8.98e-20	GTEx/v8/Adipose_Subcutaneous:GTEx/v8/Cells_EBV-transformed_lymphocytes:GTEx/v8/Artery_Aorta:GTEx/v8/Artery_Tibial:GTEx/v8/Brain_Cerebellum:GTEx/v8/Colon_Sigmoid:GTEx/v8/Esophagus_Gastroesophageal_Junction:GTEx/v8/Esophagus_Mucosa:GTEx/v8/Esophagus_Muscularis:GTEx/v8/Lung:GTEx/v8/Muscle_Skeletal:GTEx/v8/Nerve_Tibial:GTEx/v8/Ovary:GTEx/v8/Pancreas:GTEx/v8/Prostate:GTEx/v8/Cells_Cultured_fibroblasts…	NA	1.28e-11	rs10865954;rs7617480;rs2029591;rs6446187;rs3774750	15
ENSG00000173421	CCDC36	3	49235861	49295537	1	protein_coding	339834	CCDC36	0.509349	-0.452713	253	4.28e-45	1.27e-36	GTEx/v8/Adipose_Subcutaneous:GTEx/v8/Adipose_Visceral_Omentum:GTEx/v8/Adrenal_Gland:GTEx/v8/Artery_Aorta:GTEx/v8/Artery_Coronary:GTEx/v8/Artery_Tibial:GTEx/v8/Breast_Mammary_Tissue:GTEx/v8/Colon_Sigmoid:GTEx/v8/Colon_Transverse:GTEx/v8/Esophagus_Gastroesophageal_Junction:GTEx/v8/Esophagus_Mucosa:GTEx/v8/Esophagus_Muscularis:GTEx/v8/Heart_Atrial_Appendage:GTEx/v8/Heart_Left_Ventricle:GTEx/v8/Lung:…	NA	1.28e-11	rs10865954;rs7617480;rs2029591;rs6446187;rs3774750	15
ENSG00000225399	RP11-3B7.1	3	49297518	49298744	1	protein_coding	NA	NA	NA	NA	231	1.68e-24	8.04e-19	GTEx/v8/Adipose_Subcutaneous:GTEx/v8/Adipose_Visceral_Omentum:GTEx/v8/Adrenal_Gland:GTEx/v8/Artery_Aorta:GTEx/v8/Artery_Coronary:GTEx/v8/Artery_Tibial:GTEx/v8/Brain_Anterior_cingulate_cortex_BA24:GTEx/v8/Colon_Sigmoid:GTEx/v8/Colon_Transverse:GTEx/v8/Esophagus_Gastroesophageal_Junction:GTEx/v8/Esophagus_Mucosa:GTEx/v8/Esophagus_Muscularis:GTEx/v8/Heart_Atrial_Appendage:GTEx/v8/Heart_Left_Ventricl…	NA	1.28e-11	rs10865954;rs7617480;rs2029591;rs4688760	15
ENSG00000188315	C3orf62	3	49306035	49315342	-1	protein_coding	375341	C3orf62	0.00712466	-1.95031	178	5.98e-09	8.25e-06	GTEx/v8/Adipose_Visceral_Omentum:GTEx/v8/Adrenal_Gland:GTEx/v8/Artery_Aorta:GTEx/v8/Artery_Coronary:GTEx/v8/Colon_Sigmoid:GTEx/v8/Lung:GTEx/v8/Nerve_Tibial	NA	1.28e-11	rs10865954;rs7617480;rs4688760	15
ENSG00000114316	USP4	3	49315264	49378145	-1	protein_coding	7375	USP4	6.2e-07	NA	227	2.15e-06	0.00046203	GTEx/v8/Artery_Aorta:GTEx/v8/Artery_Tibial:GTEx/v8/Brain_Cerebellum:GTEx/v8/Colon_Transverse:GTEx/v8/Heart_Atrial_Appendage:GTEx/v8/Muscle_Skeletal:GTEx/v8/Testis	NA	1.28e-11	rs7617480;rs2029591;rs10865954	15
ENSG00000233276	GPX1	3	49394609	49396033	-1	protein_coding	2876	GPX1	0.00693165	-0.616399	354	2.25e-17	1.11e-28	GTEx/v8/Adipose_Subcutaneous:GTEx/v8/Adipose_Visceral_Omentum:GTEx/v8/Adrenal_Gland:GTEx/v8/Artery_Aorta:GTEx/v8/Artery_Tibial:GTEx/v8/Brain_Anterior_cingulate_cortex_BA24:GTEx/v8/Brain_Caudate_basal_ganglia:GTEx/v8/Brain_Cerebellar_Hemisphere:GTEx/v8/Brain_Cerebellum:GTEx/v8/Brain_Cortex:GTEx/v8/Brain_Frontal_Cortex_BA9:GTEx/v8/Brain_Hippocampus:GTEx/v8/Brain_Nucleus_accumbens_basal_ganglia:GTEx…	NA	1.28e-11	rs10865954;rs6446187;rs3774750;rs7617480;rs2029591	15
ENSG00000067560	RHOA	3	49396578	49450431	-1	protein_coding	387	RHOA	0.804698	-0.430263	363	4.76e-19	2.14e-14	GTEx/v8/Muscle_Skeletal:GTEx/v8/Nerve_Tibial	NA	1.28e-11	rs10865954;rs7617480;rs2029591;rs6446187;rs3774750	15
ENSG00000235908	RHOA-IT1	3	49402578	49404439	-1	sense_intronic	106480739	RHOA-IT1	NA	NA	147	4.59e-05	2.09e-07	GTEx/v8/Whole_Blood:GTEx/v8/Colon_Sigmoid:GTEx/v8/Heart_Atrial_Appendage:GTEx/v8/Skin_Not_Sun_Exposed_Suprapubic:GTEx/v8/Thyroid	NA	1.28e-11	rs7617480;rs6446187;rs3774750;rs10865954	15
ENSG00000145022	TCTA	3	49449639	49453908	1	protein_coding	6988	TCTA	0.0132648	-0.595941	334	2.26e-12	7.6e-09	GTEx/v8/Adipose_Subcutaneous:GTEx/v8/Artery_Tibial:GTEx/v8/Colon_Sigmoid:GTEx/v8/Colon_Transverse:GTEx/v8/Esophagus_Gastroesophageal_Junction:GTEx/v8/Esophagus_Mucosa:GTEx/v8/Esophagus_Muscularis:GTEx/v8/Cells_Cultured_fibroblasts:GTEx/v8/Skin_Not_Sun_Exposed_Suprapubic:GTEx/v8/Skin_Sun_Exposed_Lower_leg:GTEx/v8/Spleen:GTEx/v8/Thyroid	NA	1.28e-11	rs10865954;rs7617480;rs2029591;rs6446187;rs3774750	15
ENSG00000145020	AMT	3	49454211	49460186	-1	protein_coding	275	AMT	0.000569475	-0.0226371	389	3.44e-118	4.61e-100	GTEx/v8/Adipose_Subcutaneous:GTEx/v8/Adipose_Visceral_Omentum:GTEx/v8/Cells_EBV-transformed_lymphocytes:GTEx/v8/Whole_Blood:GTEx/v8/Artery_Aorta:GTEx/v8/Artery_Coronary:GTEx/v8/Artery_Tibial:GTEx/v8/Brain_Anterior_cingulate_cortex_BA24:GTEx/v8/Brain_Caudate_basal_ganglia:GTEx/v8/Brain_Cerebellar_Hemisphere:GTEx/v8/Brain_Cerebellum:GTEx/v8/Brain_Cortex:GTEx/v8/Brain_Frontal_Cortex_BA9:GTEx/v8/Brai…	NA	1.28e-11	rs10865954;rs7617480;rs2029591;rs6446187;rs3774750	15
ENSG00000145029	NICN1	3	49460379	49466759	-1	protein_coding	84276	NICN1	0.257246	-1.08729	387	5.12e-75	1.3e-62	GTEx/v8/Adipose_Subcutaneous:GTEx/v8/Adipose_Visceral_Omentum:GTEx/v8/Artery_Aorta:GTEx/v8/Artery_Coronary:GTEx/v8/Artery_Tibial:GTEx/v8/Brain_Caudate_basal_ganglia:GTEx/v8/Brain_Cerebellum:GTEx/v8/Brain_Cortex:GTEx/v8/Brain_Frontal_Cortex_BA9:GTEx/v8/Brain_Nucleus_accumbens_basal_ganglia:GTEx/v8/Breast_Mammary_Tissue:GTEx/v8/Colon_Sigmoid:GTEx/v8/Colon_Transverse:GTEx/v8/Esophagus_Gastroesophage…	NA	1.28e-11	rs10865954;rs7617480;rs2029591;rs6446187;rs3774750	15
ENSG00000173402	DAG1	3	49506146	49573048	1	protein_coding	1605	DAG1	0.940922	-0.838742	174	1.08e-06	3.64e-07	GTEx/v8/Esophagus_Mucosa:GTEx/v8/Heart_Left_Ventricle	NA	2.9e-10	rs6446187;rs7617480;rs2029591	15
ENSG00000226913	BSN-AS2	3	49586739	49591799	-1	lincRNA	100132677	BSN-AS2	NA	NA	183	9.29e-08	9.2e-07	GTEx/v8/Brain_Cortex:GTEx/v8/Brain_Frontal_Cortex_BA9:GTEx/v8/Brain_Nucleus_accumbens_basal_ganglia:GTEx/v8/Brain_Putamen_basal_ganglia:GTEx/v8/Muscle_Skeletal:GTEx/v8/Nerve_Tibial:GTEx/v8/Pituitary:GTEx/v8/Cells_Cultured_fibroblasts:GTEx/v8/Stomach:GTEx/v8/Thyroid	NA	1.28e-11	rs10865954;rs7617480;rs2029591	15
ENSG00000164061	BSN	3	49591922	49708978	1	protein_coding	8927	BSN	1	-1.28511	97	1.15e-06	9.75e-06	GTEx/v8/Artery_Tibial:GTEx/v8/Brain_Cerebellum:GTEx/v8/Liver:GTEx/v8/Thyroid	NA	1.62e-10	rs3774750;rs7617480;rs6446187	15
ENSG00000164062	APEH	3	49711435	49721396	1	protein_coding	327	APEH	0.0132157	-0.271805	333	1.1e-07	2.82e-17	GTEx/v8/Adipose_Subcutaneous:GTEx/v8/Esophagus_Mucosa:GTEx/v8/Nerve_Tibial:GTEx/v8/Cells_Cultured_fibroblasts:GTEx/v8/Skin_Not_Sun_Exposed_Suprapubic:GTEx/v8/Skin_Sun_Exposed_Lower_leg	NA	6.26e-11	rs6446187;rs3774750;rs7617480;rs2029591;rs10865954	15
ENSG00000173531	MST1	3	49721380	49726934	-1	protein_coding	4485	MST1	1.73e-10	0.158165	145	1.27e-07	2.09e-18	GTEx/v8/Adipose_Subcutaneous:GTEx/v8/Brain_Cerebellum:GTEx/v8/Colon_Sigmoid:GTEx/v8/Colon_Transverse:GTEx/v8/Esophagus_Mucosa:GTEx/v8/Esophagus_Muscularis:GTEx/v8/Lung:GTEx/v8/Muscle_Skeletal:GTEx/v8/Nerve_Tibial:GTEx/v8/Pituitary:GTEx/v8/Skin_Not_Sun_Exposed_Suprapubic:GTEx/v8/Skin_Sun_Exposed_Lower_leg:GTEx/v8/Thyroid	NA	6.26e-11	rs6446187;rs7617480;rs4688760;rs3774750	15
ENSG00000164068	RNF123	3	49726932	49758962	1	protein_coding	63891	RNF123	0.969715	-0.461991	322	8.28e-35	6.27e-28	GTEx/v8/Adipose_Subcutaneous:GTEx/v8/Adipose_Visceral_Omentum:GTEx/v8/Cells_EBV-transformed_lymphocytes:GTEx/v8/Artery_Aorta:GTEx/v8/Artery_Coronary:GTEx/v8/Artery_Tibial:GTEx/v8/Brain_Amygdala:GTEx/v8/Brain_Anterior_cingulate_cortex_BA24:GTEx/v8/Brain_Caudate_basal_ganglia:GTEx/v8/Brain_Cerebellar_Hemisphere:GTEx/v8/Brain_Cerebellum:GTEx/v8/Brain_Cortex:GTEx/v8/Brain_Frontal_Cortex_BA9:GTEx/v8/B…	NA	1.28e-11	rs7617480;rs10865954;rs2029591;rs6446187;rs4688760;rs3774750	15
ENSG00000173540	GMPPB	3	49754277	49761384	-1	protein_coding	29925	GMPPB	8.25e-05	-0.659554	388	1.4e-76	3.65e-63	GTEx/v8/Adipose_Subcutaneous:GTEx/v8/Adipose_Visceral_Omentum:GTEx/v8/Adrenal_Gland:GTEx/v8/Whole_Blood:GTEx/v8/Artery_Aorta:GTEx/v8/Artery_Coronary:GTEx/v8/Artery_Tibial:GTEx/v8/Brain_Amygdala:GTEx/v8/Brain_Anterior_cingulate_cortex_BA24:GTEx/v8/Brain_Caudate_basal_ganglia:GTEx/v8/Brain_Cerebellar_Hemisphere:GTEx/v8/Brain_Cerebellum:GTEx/v8/Brain_Cortex:GTEx/v8/Brain_Frontal_Cortex_BA9:GTEx/v8/B…	NA	1.28e-11	rs10865954;rs7617480;rs2029591;rs6446187;rs4688760;rs3774750	15
ENSG00000176095	IP6K1	3	49761727	49823975	-1	protein_coding	9807	IP6K1	0.23518	-2.10343	317	1.61e-06	0.00036504	GTEx/v8/Adipose_Subcutaneous:GTEx/v8/Adipose_Visceral_Omentum:GTEx/v8/Artery_Tibial:GTEx/v8/Esophagus_Gastroesophageal_Junction:GTEx/v8/Esophagus_Mucosa:GTEx/v8/Esophagus_Muscularis:GTEx/v8/Muscle_Skeletal:GTEx/v8/Nerve_Tibial:GTEx/v8/Skin_Not_Sun_Exposed_Suprapubic:GTEx/v8/Skin_Sun_Exposed_Lower_leg:GTEx/v8/Thyroid	NA	1.28e-11	rs2029591;rs7617480;rs6446187;rs3774750;rs10865954;rs4688760	15
ENSG00000187492	CDHR4	3	49828165	49837268	-1	protein_coding	389118	CDHR4	0.0134739	0.0436097	376	4.89e-27	3.61e-66	GTEx/v8/Artery_Aorta:GTEx/v8/Artery_Tibial:GTEx/v8/Colon_Sigmoid:GTEx/v8/Esophagus_Mucosa:GTEx/v8/Nerve_Tibial:GTEx/v8/Skin_Not_Sun_Exposed_Suprapubic:GTEx/v8/Skin_Sun_Exposed_Lower_leg:GTEx/v8/Testis:GTEx/v8/Thyroid	NA	1.28e-11	rs2029591;rs6446187;rs3774750;rs10865954;rs7617480;rs4688760	15
ENSG00000185614	FAM212A	3	49840687	49842463	1	protein_coding	389119	FAM212A	0.000589161	NA	318	6.09e-45	1.03e-36	GTEx/v8/Artery_Aorta:GTEx/v8/Artery_Tibial:GTEx/v8/Brain_Cerebellar_Hemisphere:GTEx/v8/Brain_Cerebellum:GTEx/v8/Esophagus_Mucosa:GTEx/v8/Muscle_Skeletal:GTEx/v8/Cells_Cultured_fibroblasts:GTEx/v8/Skin_Not_Sun_Exposed_Suprapubic:GTEx/v8/Skin_Sun_Exposed_Lower_leg:GTEx/v8/Testis	NA	5.71e-11	rs6446187;rs4688760;rs3774750;rs2029591;rs7617480;rs10865954	15
ENSG00000182179	UBA7	3	49842640	49851379	-1	protein_coding	7318	UBA7	2.68e-14	-0.315381	308	9.1e-62	2.47e-51	GTEx/v8/Whole_Blood:GTEx/v8/Artery_Aorta:GTEx/v8/Artery_Tibial:GTEx/v8/Colon_Sigmoid:GTEx/v8/Colon_Transverse:GTEx/v8/Esophagus_Mucosa:GTEx/v8/Esophagus_Muscularis:GTEx/v8/Liver:GTEx/v8/Lung:GTEx/v8/Muscle_Skeletal:GTEx/v8/Nerve_Tibial:GTEx/v8/Pancreas:GTEx/v8/Prostate:GTEx/v8/Minor_Salivary_Gland:GTEx/v8/Cells_Cultured_fibroblasts:GTEx/v8/Skin_Not_Sun_Exposed_Suprapubic:GTEx/v8/Skin_Sun_Exposed_…	NA	6.26e-11	rs7617480;rs2029591;rs6446187;rs4688760;rs3774750	15
ENSG00000183763	TRAIP	3	49866034	49894007	-1	protein_coding	10293	TRAIP	0.125104	-0.132255	207	2.24e-06	1.81e-07	GTEx/v8/Skin_Not_Sun_Exposed_Suprapubic:GTEx/v8/Testis	NA	2.9e-10	rs6446187;rs3774750;rs7617480;rs2029591	15
ENSG00000164076	CAMKV	3	49895421	49907655	-1	protein_coding	79012	CAMKV	0.996846	-0.638323	164	1.65e-18	1.47e-13	GTEx/v8/Small_Intestine_Terminal_Ileum:GTEx/v8/Stomach:GTEx/v8/Testis	NA	6.26e-11	rs6446187;rs4688760;rs3774750	15
ENSG00000234667	ACTBP13	3	49910780	49915413	-1	pseudogene	389120	ACTBP13	NA	NA	288	6.86e-40	8.73e-32	GTEx/v8/Skin_Not_Sun_Exposed_Suprapubic:GTEx/v8/Skin_Sun_Exposed_Lower_leg:GTEx/v8/Stomach	NA	6.26e-11	rs7617480;rs2029591;rs6446187;rs4688760;rs3774750	15
ENSG00000164078	MST1R	3	49924435	49941299	-1	protein_coding	4486	MST1R	1.69e-20	-0.377645	223	4.42e-21	3.13e-16	GTEx/v8/Adipose_Subcutaneous:GTEx/v8/Adipose_Visceral_Omentum:GTEx/v8/Whole_Blood:GTEx/v8/Artery_Aorta:GTEx/v8/Artery_Tibial:GTEx/v8/Brain_Anterior_cingulate_cortex_BA24:GTEx/v8/Brain_Caudate_basal_ganglia:GTEx/v8/Brain_Cerebellar_Hemisphere:GTEx/v8/Brain_Cerebellum:GTEx/v8/Brain_Cortex:GTEx/v8/Brain_Nucleus_accumbens_basal_ganglia:GTEx/v8/Brain_Spinal_cord_cervical_c-1:GTEx/v8/Colon_Sigmoid:GTEx…	NA	6.26e-11	rs2029591;rs6446187;rs4688760;rs3774750;rs7617480	15
ENSG00000228008	CTD-2330K9.3	3	49941278	49954370	1	protein_coding	NA	NA	NA	NA	216	6.92e-11	2.36e-07	GTEx/v8/Artery_Aorta:GTEx/v8/Colon_Sigmoid:GTEx/v8/Colon_Transverse:GTEx/v8/Esophagus_Muscularis:GTEx/v8/Lung:GTEx/v8/Small_Intestine_Terminal_Ileum:GTEx/v8/Stomach:GTEx/v8/Thyroid	NA	6.26e-11	rs2029591;rs6446187;rs4688760;rs3774750;rs7617480	15
ENSG00000164077	MON1A	3	49946302	49967606	-1	protein_coding	84315	MON1A	0.00636811	-0.629673	202	1.43e-07	1.16e-05	GTEx/v8/Adrenal_Gland:GTEx/v8/Whole_Blood:GTEx/v8/Artery_Tibial:GTEx/v8/Esophagus_Muscularis:GTEx/v8/Testis:GTEx/v8/Thyroid	NA	6.26e-11	rs6446187;rs3774750;rs4688760;rs2029591	15
ENSG00000004534	RBM6	3	49977440	50137478	1	protein_coding	10180	RBM6	1	-0.685653	314	1.03e-130	3.3e-109	GTEx/v8/Adipose_Subcutaneous:GTEx/v8/Adipose_Visceral_Omentum:GTEx/v8/Adrenal_Gland:GTEx/v8/Cells_EBV-transformed_lymphocytes:GTEx/v8/Whole_Blood:GTEx/v8/Artery_Aorta:GTEx/v8/Artery_Coronary:GTEx/v8/Artery_Tibial:GTEx/v8/Brain_Amygdala:GTEx/v8/Brain_Anterior_cingulate_cortex_BA24:GTEx/v8/Brain_Caudate_basal_ganglia:GTEx/v8/Brain_Cerebellar_Hemisphere:GTEx/v8/Brain_Cerebellum:GTEx/v8/Brain_Cortex:…	NA	6.26e-11	rs7617480;rs2029591;rs6446187;rs4688760;rs3774750;rs10865954	15
ENSG00000003756	RBM5	3	50126341	50156454	1	protein_coding	10181	RBM5	0.999999	-0.605889	141	5.74e-06	0.00272786	GTEx/v8/Adipose_Visceral_Omentum:GTEx/v8/Esophagus_Mucosa:GTEx/v8/Nerve_Tibial	NA	6.26e-11	rs6446187;rs3774750	15
ENSG00000235016	RP11-493K19.3	3	50153455	50193518	-1	antisense	100129060	SEMA3F-AS1	NA	NA	110	2.35e-05	0.0133782	GTEx/v8/Brain_Cerebellar_Hemisphere:GTEx/v8/Lung	NA	6.26e-11	rs6446187;rs3774750	15
ENSG00000001617	SEMA3F	3	50192478	50226508	1	protein_coding	6405	SEMA3F	0.999918	NA	168	1.01e-09	8.52e-09	GTEx/v8/Adipose_Subcutaneous:GTEx/v8/Adipose_Visceral_Omentum:GTEx/v8/Artery_Aorta:GTEx/v8/Brain_Cortex:GTEx/v8/Esophagus_Muscularis:GTEx/v8/Heart_Atrial_Appendage:GTEx/v8/Heart_Left_Ventricle:GTEx/v8/Lung:GTEx/v8/Nerve_Tibial:GTEx/v8/Ovary:GTEx/v8/Spleen	NA	1.97e-11	rs6446187;rs3774750;rs2029591;rs10865954	15
ENSG00000114349	GNAT1	3	50229045	50233949	1	protein_coding	2779	GNAT1	2.51e-06	-0.274733	15	6.27e-05	0.0214064	GTEx/v8/Lung	NA	3.69e-09	rs6446187;rs3774750	15
ENSG00000188338	SLC38A3	3	50242679	50258411	1	processed_transcript	10991	SLC38A3	NA	NA	169	2.81e-09	7.19e-14	GTEx/v8/Artery_Aorta:GTEx/v8/Skin_Sun_Exposed_Lower_leg:GTEx/v8/Thyroid	NA	6.26e-11	rs6446187;rs3774750;rs2029591;rs7617480	15
ENSG00000114353	GNAI2	3	50263724	50296787	1	protein_coding	2771	GNAI2	0.86116	-0.965006	16	7.28e-05	1e-05	GTEx/v8/Whole_Blood:GTEx/v8/Skin_Sun_Exposed_Lower_leg	NA	4.49e-09	rs3774750;rs2029591;rs6446187	15
ENSG00000213600	U73169.1	3	50277054	50277416	1	pseudogene	NA	NA	NA	NA	17	7.81e-05	0.00520673	GTEx/v8/Whole_Blood	NA	9.51e-09	rs6446187;rs3774750	15
ENSG00000012171	SEMA3B	3	50304990	50314977	1	processed_transcript	7869	SEMA3B	NA	NA	4	0.00022929	0.00206485	GTEx/v8/Testis	NA	0.0009442	rs3774750	15
ENSG00000179564	LSMEM2	3	50316458	50325545	1	protein_coding	132228	LSMEM2	2.89e-05	-0.548022	9	0.00048279	0.00239992	GTEx/v8/Muscle_Skeletal	NA	3.69e-09	rs6446187;rs3774750	15
ENSG00000214706	IFRD2	3	50325163	50330349	-1	protein_coding	7866	IFRD2	5.53e-06	-0.616738	10	5.28e-05	8.87e-06	GTEx/v8/Heart_Left_Ventricle:GTEx/v8/Muscle_Skeletal:GTEx/v8/Stomach	NA	1.89e-05	rs3774750;rs6446187	15
ENSG00000186792	HYAL3	3	50330262	50336899	-1	protein_coding	8372	HYAL3	1.52e-05	-0.35315	286	1.93e-19	9.34e-66	GTEx/v8/Adipose_Subcutaneous:GTEx/v8/Adipose_Visceral_Omentum:GTEx/v8/Adrenal_Gland:GTEx/v8/Cells_EBV-transformed_lymphocytes:GTEx/v8/Whole_Blood:GTEx/v8/Artery_Aorta:GTEx/v8/Artery_Coronary:GTEx/v8/Artery_Tibial:GTEx/v8/Brain_Anterior_cingulate_cortex_BA24:GTEx/v8/Brain_Caudate_basal_ganglia:GTEx/v8/Brain_Cerebellar_Hemisphere:GTEx/v8/Brain_Cerebellum:GTEx/v8/Brain_Cortex:GTEx/v8/Brain_Frontal_C…	NA	6.26e-11	rs2029591;rs7617480;rs4688760;rs6446187;rs3774750	15
ENSG00000243477	NAT6	3	50333833	50336852	-1	protein_coding	24142	NAT6	0.402945	-0.113189	101	4.33e-10	1.51e-13	GTEx/v8/Adipose_Subcutaneous:GTEx/v8/Artery_Aorta:GTEx/v8/Artery_Tibial:GTEx/v8/Brain_Anterior_cingulate_cortex_BA24:GTEx/v8/Brain_Cortex:GTEx/v8/Brain_Frontal_Cortex_BA9:GTEx/v8/Colon_Sigmoid:GTEx/v8/Colon_Transverse:GTEx/v8/Esophagus_Mucosa:GTEx/v8/Heart_Atrial_Appendage:GTEx/v8/Heart_Left_Ventricle:GTEx/v8/Lung:GTEx/v8/Muscle_Skeletal:GTEx/v8/Nerve_Tibial:GTEx/v8/Cells_Cultured_fibroblasts:GTE…	NA	6.26e-11	rs2029591;rs4688760;rs3774750;rs6446187;rs7617480	15
ENSG00000114378	HYAL1	3	50337320	50349812	-1	protein_coding	3373	HYAL1	0.00553671	0.476164	158	7.68e-07	8.74e-21	GTEx/v8/Adipose_Subcutaneous:GTEx/v8/Adipose_Visceral_Omentum:GTEx/v8/Adrenal_Gland:GTEx/v8/Artery_Tibial:GTEx/v8/Heart_Left_Ventricle:GTEx/v8/Lung:GTEx/v8/Nerve_Tibial:GTEx/v8/Pancreas:GTEx/v8/Cells_Cultured_fibroblasts:GTEx/v8/Skin_Not_Sun_Exposed_Suprapubic:GTEx/v8/Skin_Sun_Exposed_Lower_leg:GTEx/v8/Spleen:GTEx/v8/Thyroid	NA	6.26e-11	rs3774750;rs6446187;rs4688760	15
ENSG00000114383	TUSC2	3	50357458	50365682	-1	protein_coding	11334	TUSC2	0.703033	-0.593776	25	0.00045043	0.0179681	GTEx/v8/Nerve_Tibial	NA	2.9e-10	rs2029591	15
ENSG00000068028	RASSF1	3	50367219	50378411	-1	protein_coding	11186	RASSF1	4.86e-08	-0.411947	104	2.86e-05	2.71e-09	GTEx/v8/Adipose_Subcutaneous:GTEx/v8/Brain_Cerebellum:GTEx/v8/Skin_Not_Sun_Exposed_Suprapubic:GTEx/v8/Spleen	NA	6.26e-11	rs6446187;rs3774750	15
ENSG00000114388	NPRL2	3	50384761	50388522	-1	protein_coding	10641	NPRL2	0.345175	-0.107064	2	0.00031129	0.0367669	GTEx/v8/Thyroid	NA	0.0008056	rs6446187;rs3774750	15
ENSG00000114395	CYB561D2	3	50388126	50395891	1	protein_coding	11068	CYB561D2	0.0147105	-0.298456	12	1.85e-08	2.37e-28	GTEx/v8/Adipose_Visceral_Omentum:GTEx/v8/Esophagus_Mucosa:GTEx/v8/Esophagus_Muscularis:GTEx/v8/Liver:GTEx/v8/Muscle_Skeletal:GTEx/v8/Pancreas:GTEx/v8/Skin_Sun_Exposed_Lower_leg:GTEx/v8/Stomach:GTEx/v8/Thyroid	NA	9.51e-09	rs3774750;rs6446187	15
ENSG00000007402	CACNA2D2	3	50400233	50541675	-1	protein_coding	9254	CACNA2D2	0.999693	NA	107	5.25e-07	0.00016817	GTEx/v8/Liver:GTEx/v8/Pancreas:GTEx/v8/Thyroid	NA	6.26e-11	rs3774750;rs6446187	15
ENSG00000088543	C3orf18	3	50595462	50608458	-1	protein_coding	51161	C3orf18	0.014308	-1.53819	2	0.00044568	4.43e-14	GTEx/v8/Heart_Left_Ventricle:GTEx/v8/Muscle_Skeletal	NA	0.0009442	rs3774750	15
ENSG00000114735	HEMK1	3	50606583	50622366	1	protein_coding	51409	HEMK1	8.23e-05	-2.53452	12	6.55e-05	1.55e-12	GTEx/v8/Whole_Blood:GTEx/v8/Esophagus_Muscularis:GTEx/v8/Heart_Atrial_Appendage:GTEx/v8/Muscle_Skeletal:GTEx/v8/Nerve_Tibial	NA	1.89e-05	rs2029591;rs6446187;rs3774750	15
ENSG00000114738	MAPKAPK3	3	50648951	50686720	1	protein_coding	7867	MAPKAPK3	2.71e-06	0.0772686	127	8.31e-07	9.16e-48	GTEx/v8/Muscle_Skeletal:GTEx/v8/Thyroid	NA	6.26e-11	rs2029591;rs6446187;rs3774750	15
ENSG00000273356	RP11-804H8.6	3	50707420	50709479	1	lincRNA	NA	NA	NA	NA	3	0.000113	6.61e-05	GTEx/v8/Nerve_Tibial:GTEx/v8/Pituitary	NA	0.0009442	rs6446187;rs3774750	15
ENSG00000088538	DOCK3	3	50712672	51421629	1	protein_coding	1795	DOCK3	1	-0.836765	161	1.79e-07	1.06e-80	GTEx/v8/Adipose_Subcutaneous:GTEx/v8/Lung:GTEx/v8/Nerve_Tibial:GTEx/v8/Skin_Not_Sun_Exposed_Suprapubic:GTEx/v8/Skin_Sun_Exposed_Lower_leg:GTEx/v8/Thyroid	NA	6.26e-11	rs3774750;rs2029591;rs6446187;rs4688760	15
ENSG00000185565	LSAMP	3	115521235	117716095	-1	protein_coding	4045	LSAMP	0.946284	NA	44	1.9e-09	2.69e-27	GTEx/v8/Adrenal_Gland:GTEx/v8/Pancreas	NA	4.7e-08	rs9861346	16
ENSG00000239268	RP11-384F7.2	3	117391001	117716439	-1	lincRNA	NA	NA	NA	NA	44	4.71e-07	2.89e-24	GTEx/v8/Adrenal_Gland:GTEx/v8/Nerve_Tibial	NA	4.7e-08	rs9861346	16
ENSG00000181744	C3orf58	3	143690640	143767561	1	protein_coding	205428	C3orf58	0.162504	-0.239967	41	7.86e-14	6.36e-10	GTEx/v8/Cells_Cultured_fibroblasts:GTEx/v8/Skin_Not_Sun_Exposed_Suprapubic:GTEx/v8/Skin_Sun_Exposed_Lower_leg:GTEx/v8/Small_Intestine_Terminal_Ileum	NA	1.22e-08	rs6765491	17
ENSG00000247828	TMEM161B-AS1	5	87564712	87732502	1	antisense	100505894	TMEM161B-AS1	NA	NA	37	5.11e-20	1.16e-44	GTEx/v8/Adipose_Subcutaneous:GTEx/v8/Adipose_Visceral_Omentum:GTEx/v8/Adrenal_Gland:GTEx/v8/Cells_EBV-transformed_lymphocytes:GTEx/v8/Whole_Blood:GTEx/v8/Artery_Aorta:GTEx/v8/Artery_Tibial:GTEx/v8/Brain_Anterior_cingulate_cortex_BA24:GTEx/v8/Brain_Caudate_basal_ganglia:GTEx/v8/Brain_Cerebellar_Hemisphere:GTEx/v8/Brain_Cerebellum:GTEx/v8/Brain_Cortex:GTEx/v8/Brain_Frontal_Cortex_BA9:GTEx/v8/Brain_…	NA	8.76e-09	rs247909	18
ENSG00000250156	CTC-498M16.2	5	87704799	87734907	-1	lincRNA	102546226	LINC02060	NA	NA	37	3.73e-07	0.0006614	GTEx/v8/Brain_Cerebellum:GTEx/v8/Colon_Sigmoid:GTEx/v8/Muscle_Skeletal:GTEx/v8/Prostate	NA	8.76e-09	rs247909	18
ENSG00000271904	CTC-498M16.4	5	87729709	87794514	-1	lincRNA	NA	NA	NA	NA	70	1.74e-20	7.15e-17	GTEx/v8/Brain_Amygdala:GTEx/v8/Brain_Anterior_cingulate_cortex_BA24:GTEx/v8/Brain_Caudate_basal_ganglia:GTEx/v8/Brain_Cerebellum:GTEx/v8/Brain_Cortex:GTEx/v8/Brain_Frontal_Cortex_BA9:GTEx/v8/Brain_Hippocampus:GTEx/v8/Brain_Hypothalamus:GTEx/v8/Brain_Nucleus_accumbens_basal_ganglia:GTEx/v8/Brain_Putamen_basal_ganglia:GTEx/v8/Brain_Substantia_nigra	NA	8.76e-09	rs247909;rs27732	18
ENSG00000250377	CTC-467M3.3	5	87988462	87989789	-1	lincRNA	NA	NA	NA	NA	35	9.46e-07	0.00024363	GTEx/v8/Brain_Anterior_cingulate_cortex_BA24:GTEx/v8/Brain_Cerebellar_Hemisphere:GTEx/v8/Brain_Frontal_Cortex_BA9	NA	1.36e-08	rs247909;rs27732	18
ENSG00000248309	MEF2C-AS1	5	88179145	88762215	1	antisense	101929423	MEF2C-AS1	NA	NA	33	3.61e-07	4.03e-22	GTEx/v8/Muscle_Skeletal	NA	1.36e-08	rs27732	18
ENSG00000250049	RP11-348J24.2	5	91378414	91815133	1	lincRNA	NA	NA	NA	NA	46	9.64e-08	4.3e-05	GTEx/v8/Heart_Atrial_Appendage	NA	7.73e-09	rs12187247	19
ENSG00000248864	RP11-348J24.1	5	91625047	91628401	1	lincRNA	NA	NA	NA	NA	53	2.48e-08	7.64e-05	GTEx/v8/Heart_Atrial_Appendage:GTEx/v8/Heart_Left_Ventricle	NA	7.73e-09	rs12187247	19
ENSG00000251574	RP11-6N13.1	5	103718999	104728671	-1	lincRNA	NA	NA	NA	NA	168	5.11e-19	9.96e-15	GTEx/v8/Testis	NA	3.77e-19	rs12658032;rs55649128;rs349586;rs396755;rs10042031;rs1363103	20
ENSG00000112343	TRIM38	6	25963030	25987384	1	protein_coding	10475	TRIM38	4.75e-06	-0.220583	75	1.71e-05	2.71e-11	GTEx/v8/Whole_Blood	NA	2.96e-08	rs71557335	21
ENSG00000272462	U91328.19	6	25992890	26002003	1	lincRNA	NA	NA	NA	NA	27	1.65e-05	2.19e-09	GTEx/v8/Whole_Blood	NA	2.35e-05	rs71557335	21
ENSG00000186470	BTN3A2	6	26365387	26378546	1	protein_coding	11118	BTN3A2	0.000124519	2.20791	144	8.95e-141	3.79e-120	GTEx/v8/Adipose_Subcutaneous:GTEx/v8/Adipose_Visceral_Omentum:GTEx/v8/Adrenal_Gland:GTEx/v8/Cells_EBV-transformed_lymphocytes:GTEx/v8/Whole_Blood:GTEx/v8/Artery_Aorta:GTEx/v8/Artery_Coronary:GTEx/v8/Artery_Tibial:GTEx/v8/Brain_Amygdala:GTEx/v8/Brain_Anterior_cingulate_cortex_BA24:GTEx/v8/Brain_Caudate_basal_ganglia:GTEx/v8/Brain_Cerebellar_Hemisphere:GTEx/v8/Brain_Cerebellum:GTEx/v8/Brain_Cortex:…	NA	2.96e-08	rs71557335	21
ENSG00000124508	BTN2A2	6	26383324	26395102	1	protein_coding	10385	BTN2A2	0.000150288	1.01572	144	6.81e-12	1.16e-15	GTEx/v8/Brain_Caudate_basal_ganglia:GTEx/v8/Brain_Nucleus_accumbens_basal_ganglia:GTEx/v8/Pancreas:GTEx/v8/Skin_Sun_Exposed_Lower_leg:GTEx/v8/Testis	NA	2.96e-08	rs71557335	21
ENSG00000026950	BTN3A1	6	26402465	26415444	1	protein_coding	11119	BTN3A1	8.65e-07	1.62791	144	3.91e-09	2.82e-30	GTEx/v8/Artery_Tibial:GTEx/v8/Nerve_Tibial:GTEx/v8/Testis	NA	2.96e-08	rs71557335	21
ENSG00000124549	BTN2A3P	6	26421619	26432611	1	pseudogene	54718	BTN2A3P	NA	NA	80	8.71e-05	0.0182293	GTEx/v8/Brain_Cerebellum:GTEx/v8/Spleen	NA	2.96e-08	rs71557335	21
ENSG00000111801	BTN3A3	6	26440700	26453643	1	protein_coding	10384	BTN3A3	7.19e-10	1.09011	130	3.98e-07	7.78e-10	GTEx/v8/Adipose_Visceral_Omentum:GTEx/v8/Brain_Cerebellar_Hemisphere:GTEx/v8/Brain_Cortex:GTEx/v8/Lung	NA	2.96e-08	rs71557335	21
ENSG00000124557	BTN1A1	6	26501449	26510650	1	protein_coding	696	BTN1A1	1.14e-09	-0.329705	27	2.68e-06	2.07e-11	GTEx/v8/Testis	NA	5.8e-05	rs71557335	21
ENSG00000228223	HCG11	6	26522076	26526807	1	lincRNA	493812	HCG11	NA	NA	127	1.78e-06	0.00013865	GTEx/v8/Brain_Cerebellum:GTEx/v8/Muscle_Skeletal:GTEx/v8/Nerve_Tibial	NA	2.96e-08	rs71557335	21
ENSG00000261353	CTA-14H9.5	6	26527291	26527632	1	lincRNA	NA	NA	NA	NA	131	2.85e-07	0.00041883	GTEx/v8/Muscle_Skeletal	NA	2.96e-08	rs71557335	21
ENSG00000182952	HMGN4	6	26538633	26546482	1	protein_coding	10473	HMGN4	0.557082	-0.351003	144	2.17e-09	2.54e-33	GTEx/v8/Artery_Aorta:GTEx/v8/Heart_Atrial_Appendage:GTEx/v8/Muscle_Skeletal:GTEx/v8/Nerve_Tibial:GTEx/v8/Skin_Not_Sun_Exposed_Suprapubic	NA	2.96e-08	rs71557335	21
ENSG00000146109	ABT1	6	26597180	26600278	1	protein_coding	29777	ABT1	0.0271056	0.104221	11	6.93e-05	4.16e-17	GTEx/v8/Whole_Blood	NA	6.84e-05	rs71557335	21
ENSG00000241549	GUSBP2	6	26839263	26924333	-1	pseudogene	387036	GUSBP2	NA	NA	184	8.93e-07	3.35e-61	GTEx/v8/Adipose_Subcutaneous:GTEx/v8/Colon_Sigmoid:GTEx/v8/Esophagus_Mucosa:GTEx/v8/Cells_Cultured_fibroblasts:GTEx/v8/Skin_Sun_Exposed_Lower_leg:GTEx/v8/Testis	NA	2.33e-08	rs71557335;rs4713177	21:22:00
ENSG00000224843	LINC00240	6	26924771	26991703	1	lincRNA	100133205	LINC00240	NA	NA	216	3.44e-13	6.91e-20	GTEx/v8/Adipose_Subcutaneous:GTEx/v8/Adipose_Visceral_Omentum:GTEx/v8/Adrenal_Gland:GTEx/v8/Artery_Tibial:GTEx/v8/Breast_Mammary_Tissue:GTEx/v8/Colon_Transverse:GTEx/v8/Esophagus_Gastroesophageal_Junction:GTEx/v8/Esophagus_Mucosa:GTEx/v8/Heart_Left_Ventricle:GTEx/v8/Muscle_Skeletal:GTEx/v8/Nerve_Tibial:GTEx/v8/Cells_Cultured_fibroblasts:GTEx/v8/Skin_Not_Sun_Exposed_Suprapubic:GTEx/v8/Skin_Sun_Exp…	NA	2.33e-08	rs71557335;rs4713177	21:22:00
ENSG00000124635	HIST1H2BJ	6	27093676	27100541	-1	protein_coding	8970	HIST1H2BJ	0.478842	0.308582	23	5.6e-05	0.00723663	GTEx/v8/Whole_Blood:GTEx/v8/Artery_Tibial	NA	2.28e-06	rs71557335	21
ENSG00000197903	HIST1H2BK	6	27106073	27114619	-1	protein_coding	85236	HIST1H2BK	0.490754	-0.0430523	218	1.54e-06	1.94e-06	GTEx/v8/Adipose_Subcutaneous:GTEx/v8/Adipose_Visceral_Omentum:GTEx/v8/Artery_Tibial:GTEx/v8/Brain_Cerebellum:GTEx/v8/Lung:GTEx/v8/Nerve_Tibial	NA	2.07e-08	rs71557335;rs4713177	21:22:00
ENSG00000112812	PRSS16	6	27215480	27224403	1	protein_coding	10279	PRSS16	2.24e-06	0.00884812	288	4.61e-10	6.24e-16	GTEx/v8/Adipose_Subcutaneous:GTEx/v8/Adipose_Visceral_Omentum:GTEx/v8/Adrenal_Gland:GTEx/v8/Artery_Aorta:GTEx/v8/Artery_Tibial:GTEx/v8/Brain_Cerebellar_Hemisphere:GTEx/v8/Brain_Cerebellum:GTEx/v8/Esophagus_Gastroesophageal_Junction:GTEx/v8/Esophagus_Mucosa:GTEx/v8/Esophagus_Muscularis:GTEx/v8/Ovary:GTEx/v8/Prostate:GTEx/v8/Skin_Not_Sun_Exposed_Suprapubic:GTEx/v8/Skin_Sun_Exposed_Lower_leg:GTEx/v8…	NA	1.67e-08	rs71557335;rs4713177	21:22:00
ENSG00000204789	ZNF204P	6	27325604	27339304	-1	pseudogene	7754	ZNF204P	NA	NA	272	1.28e-05	8.13e-22	GTEx/v8/Adipose_Subcutaneous:GTEx/v8/Adipose_Visceral_Omentum:GTEx/v8/Adrenal_Gland:GTEx/v8/Artery_Aorta:GTEx/v8/Esophagus_Gastroesophageal_Junction:GTEx/v8/Esophagus_Muscularis:GTEx/v8/Nerve_Tibial:GTEx/v8/Spleen:GTEx/v8/Thyroid	NA	1.67e-08	rs4713177;rs71557335	21:22:00
ENSG00000124613	ZNF391	6	27342394	27371683	1	protein_coding	346157	ZNF391	9.26e-07	1.23172	230	1.57e-09	2.76e-96	GTEx/v8/Adipose_Subcutaneous:GTEx/v8/Adipose_Visceral_Omentum:GTEx/v8/Artery_Aorta:GTEx/v8/Artery_Coronary:GTEx/v8/Artery_Tibial:GTEx/v8/Colon_Sigmoid:GTEx/v8/Colon_Transverse:GTEx/v8/Esophagus_Mucosa:GTEx/v8/Esophagus_Muscularis:GTEx/v8/Heart_Atrial_Appendage:GTEx/v8/Cells_Cultured_fibroblasts:GTEx/v8/Skin_Not_Sun_Exposed_Suprapubic:GTEx/v8/Skin_Sun_Exposed_Lower_leg:GTEx/v8/Spleen:GTEx/v8/Thyro…	NA	1.67e-08	rs71557335;rs4713177	21:22:00
ENSG00000271755	RP1-153G14.4	6	27371789	27374743	-1	lincRNA	NA	NA	NA	NA	1	0.00037403	0.00023762	GTEx/v8/Artery_Aorta	NA	0.00027	rs4713177	22
ENSG00000237154	MCFD2P1	6	27375476	27375775	1	pseudogene	645927	MCFD2P1	NA	NA	138	3.31e-05	0.00310348	GTEx/v8/Testis	NA	1.67e-08	rs4713177	22
ENSG00000216915	RP1-97D16.1	6	27704779	27706273	-1	pseudogene	NA	NA	NA	NA	24	9.22e-05	1.25e-06	GTEx/v8/Testis:GTEx/v8/Thyroid	NA	5.01e-07	rs4713177	22
ENSG00000218069	RSL24D1P1	6	27748398	27748890	-1	pseudogene	100129755	RSL24D1P1	NA	NA	78	1.18e-07	4.72e-08	GTEx/v8/Testis	NA	2.12e-09	rs4713177	22
ENSG00000233822	HIST1H2BN	6	27806323	27823487	1	protein_coding	8341	HIST1H2BN	0.139775	0.145508	221	3.09e-06	0.00215173	GTEx/v8/Artery_Aorta:GTEx/v8/Esophagus_Muscularis:GTEx/v8/Cells_Cultured_fibroblasts:GTEx/v8/Skin_Not_Sun_Exposed_Suprapubic	NA	3.64e-10	rs4713177	22
ENSG00000184357	HIST1H1B	6	27834570	27835359	-1	protein_coding	3009	HIST1H1B	0.509139	-0.0898951	192	4.83e-06	0.00401805	GTEx/v8/Skin_Not_Sun_Exposed_Suprapubic	NA	3.64e-10	rs71557335;rs4713177	21:22:00
ENSG00000197153	HIST1H3J	6	27858093	27860884	-1	protein_coding	8356	HIST1H3J	0.695884	-0.189708	278	6.71e-24	3.89e-33	GTEx/v8/Testis	NA	3.64e-10	rs71557335;rs4713177	21:22:00
ENSG00000217539	IQCB2P	6	27978501	27980133	1	pseudogene	340192	IQCB2P	NA	NA	292	1.27e-08	2.71e-12	GTEx/v8/Testis	NA	3.64e-10	rs4713177	22
ENSG00000187763	OR2B7P	6	28014212	28015145	1	pseudogene	81695	OR2B7P	NA	NA	244	1.72e-09	7.85e-15	GTEx/v8/Pituitary:GTEx/v8/Testis	NA	8.33e-10	rs4713177	22
ENSG00000182477	OR2B8P	6	28021006	28021943	-1	pseudogene	65944	OR2B8P	NA	NA	309	5.04e-28	1.9e-59	GTEx/v8/Nerve_Tibial:GTEx/v8/Ovary:GTEx/v8/Pituitary:GTEx/v8/Prostate:GTEx/v8/Testis:GTEx/v8/Thyroid	NA	3.64e-10	rs4713177	22
ENSG00000220721	OR1F12	6	28041094	28042011	1	pseudogene	442179	OR1F12	NA	NA	309	1.53e-09	9.43e-20	GTEx/v8/Ovary:GTEx/v8/Pituitary:GTEx/v8/Prostate:GTEx/v8/Spleen:GTEx/v8/Thyroid	NA	3.64e-10	rs4713177	22
ENSG00000272009	RP1-313I6.12	6	28046570	28048908	-1	antisense	102724889	LOC102724889	NA	NA	311	2.9e-15	2.18e-19	GTEx/v8/Adipose_Subcutaneous:GTEx/v8/Adipose_Visceral_Omentum:GTEx/v8/Artery_Aorta:GTEx/v8/Breast_Mammary_Tissue:GTEx/v8/Nerve_Tibial:GTEx/v8/Cells_Cultured_fibroblasts:GTEx/v8/Skin_Sun_Exposed_Lower_leg:GTEx/v8/Spleen:GTEx/v8/Testis:GTEx/v8/Thyroid	NA	3.64e-10	rs4713177	22
ENSG00000197279	ZNF165	6	28048753	28057341	1	protein_coding	7718	ZNF165	0.000563292	0.227981	313	2.12e-14	1.75e-22	GTEx/v8/Adipose_Visceral_Omentum:GTEx/v8/Artery_Aorta:GTEx/v8/Artery_Tibial:GTEx/v8/Colon_Sigmoid:GTEx/v8/Esophagus_Mucosa:GTEx/v8/Esophagus_Muscularis:GTEx/v8/Heart_Left_Ventricle:GTEx/v8/Muscle_Skeletal:GTEx/v8/Nerve_Tibial:GTEx/v8/Cells_Cultured_fibroblasts:GTEx/v8/Stomach:GTEx/v8/Thyroid	NA	3.64e-10	rs4713177	22
ENSG00000219891	ZSCAN12P1	6	28058932	28061442	1	pseudogene	221584	ZSCAN12P1	NA	NA	273	9.21e-16	1.22e-16	GTEx/v8/Adipose_Visceral_Omentum:GTEx/v8/Brain_Cerebellum:GTEx/v8/Esophagus_Mucosa:GTEx/v8/Esophagus_Muscularis:GTEx/v8/Heart_Atrial_Appendage:GTEx/v8/Cells_Cultured_fibroblasts:GTEx/v8/Skin_Not_Sun_Exposed_Suprapubic:GTEx/v8/Skin_Sun_Exposed_Lower_leg:GTEx/v8/Stomach:GTEx/v8/Testis	NA	3.64e-10	rs4713177	22
ENSG00000219392	RP1-265C24.5	6	28083406	28084329	1	pseudogene	NA	NA	NA	NA	314	1.76e-25	1.14e-51	GTEx/v8/Adipose_Subcutaneous:GTEx/v8/Adipose_Visceral_Omentum:GTEx/v8/Adrenal_Gland:GTEx/v8/Cells_EBV-transformed_lymphocytes:GTEx/v8/Whole_Blood:GTEx/v8/Artery_Aorta:GTEx/v8/Artery_Coronary:GTEx/v8/Artery_Tibial:GTEx/v8/Brain_Amygdala:GTEx/v8/Brain_Anterior_cingulate_cortex_BA24:GTEx/v8/Brain_Caudate_basal_ganglia:GTEx/v8/Brain_Cerebellar_Hemisphere:GTEx/v8/Brain_Cerebellum:GTEx/v8/Brain_Cortex:…	NA	3.64e-10	rs4713177	22
ENSG00000269293	ZSCAN16-AS1	6	28089573	28105071	-1	antisense	100129195	ZSCAN16-AS1	NA	NA	205	3.68e-06	1.15e-08	GTEx/v8/Heart_Atrial_Appendage:GTEx/v8/Heart_Left_Ventricle:GTEx/v8/Cells_Cultured_fibroblasts	NA	9.84e-10	rs4713177	22
ENSG00000196812	ZSCAN16	6	28092338	28097860	1	protein_coding	80345	ZSCAN16	2.67e-06	0.184187	20	0.00065864	0.0283935	GTEx/v8/Thyroid	NA	1.44e-05	rs4713177	22
ENSG00000198315	ZKSCAN8	6	28109688	28127250	1	protein_coding	7745	ZKSCAN8	0.000231595	-0.142528	235	2.23e-08	3.82e-07	GTEx/v8/Brain_Cerebellum:GTEx/v8/Brain_Cortex:GTEx/v8/Brain_Frontal_Cortex_BA9:GTEx/v8/Brain_Hippocampus:GTEx/v8/Brain_Nucleus_accumbens_basal_ganglia:GTEx/v8/Muscle_Skeletal:GTEx/v8/Nerve_Tibial	NA	8.33e-10	rs4713177	22
ENSG00000226314	ZNF192P1	6	28129559	28137372	1	pseudogene	651302	ZNF192P1	NA	NA	318	1.87e-14	7.29e-32	GTEx/v8/Adipose_Subcutaneous:GTEx/v8/Adrenal_Gland:GTEx/v8/Brain_Cerebellar_Hemisphere:GTEx/v8/Brain_Cerebellum:GTEx/v8/Brain_Cortex:GTEx/v8/Breast_Mammary_Tissue:GTEx/v8/Colon_Transverse:GTEx/v8/Esophagus_Mucosa:GTEx/v8/Heart_Atrial_Appendage:GTEx/v8/Muscle_Skeletal:GTEx/v8/Pancreas:GTEx/v8/Cells_Cultured_fibroblasts:GTEx/v8/Skin_Not_Sun_Exposed_Suprapubic:GTEx/v8/Skin_Sun_Exposed_Lower_leg:GTEx…	NA	3.64e-10	rs4713177	22
ENSG00000216901	AL022393.7	6	28143966	28144452	1	pseudogene	NA	NA	NA	NA	319	4.03e-39	6.67e-149	GTEx/v8/Adipose_Subcutaneous:GTEx/v8/Adipose_Visceral_Omentum:GTEx/v8/Adrenal_Gland:GTEx/v8/Artery_Aorta:GTEx/v8/Artery_Coronary:GTEx/v8/Artery_Tibial:GTEx/v8/Brain_Amygdala:GTEx/v8/Brain_Anterior_cingulate_cortex_BA24:GTEx/v8/Brain_Caudate_basal_ganglia:GTEx/v8/Brain_Cerebellar_Hemisphere:GTEx/v8/Brain_Cerebellum:GTEx/v8/Brain_Cortex:GTEx/v8/Brain_Frontal_Cortex_BA9:GTEx/v8/Brain_Hippocampus:GTE…	NA	3.64e-10	rs4713177	22
ENSG00000218016	ZNF192P2	6	28155828	28157210	1	pseudogene	222701	ZNF192P2	NA	NA	29	3.05e-05	2.78e-11	GTEx/v8/Brain_Cerebellum:GTEx/v8/Brain_Cortex	NA	4.87e-07	rs4713177	22
ENSG00000176933	TOB2P1	6	28185421	28186655	-1	pseudogene	222699	TOB2P1	NA	NA	5	8.03e-05	3.82e-10	GTEx/v8/Adipose_Subcutaneous:GTEx/v8/Artery_Aorta:GTEx/v8/Muscle_Skeletal:GTEx/v8/Cells_Cultured_fibroblasts	NA	0.002615	rs4713177	22
ENSG00000137185	ZSCAN9	6	28192664	28201260	1	protein_coding	7746	ZSCAN9	4.1e-08	0.461166	325	9.25e-09	3.91e-09	GTEx/v8/Adipose_Subcutaneous:GTEx/v8/Artery_Aorta:GTEx/v8/Brain_Cerebellar_Hemisphere:GTEx/v8/Brain_Cerebellum:GTEx/v8/Brain_Hippocampus:GTEx/v8/Colon_Transverse:GTEx/v8/Nerve_Tibial:GTEx/v8/Pituitary:GTEx/v8/Cells_Cultured_fibroblasts:GTEx/v8/Thyroid	NA	3.64e-10	rs4713177	22
ENSG00000187626	ZKSCAN4	6	28212401	28227011	-1	protein_coding	387032	ZKSCAN4	6.74e-05	0.661631	328	7.64e-16	2.42e-17	GTEx/v8/Adipose_Visceral_Omentum:GTEx/v8/Whole_Blood:GTEx/v8/Cells_Cultured_fibroblasts:GTEx/v8/Small_Intestine_Terminal_Ileum:GTEx/v8/Spleen:GTEx/v8/Testis	NA	3.64e-10	rs4713177	22
ENSG00000189134	NKAPL	6	28227098	28228736	1	protein_coding	222698	NKAPL	0.000165621	0.0513426	18	4.2e-05	0.00083499	GTEx/v8/Adipose_Subcutaneous:GTEx/v8/Esophagus_Muscularis	NA	1.13e-05	rs4713177	22
ENSG00000197062	RP5-874C20.3	6	28234788	28245974	1	pseudogene	7741	ZSCAN26	NA	NA	329	1.05e-22	2.84e-42	GTEx/v8/Adipose_Subcutaneous:GTEx/v8/Adipose_Visceral_Omentum:GTEx/v8/Adrenal_Gland:GTEx/v8/Whole_Blood:GTEx/v8/Artery_Aorta:GTEx/v8/Artery_Tibial:GTEx/v8/Brain_Anterior_cingulate_cortex_BA24:GTEx/v8/Brain_Caudate_basal_ganglia:GTEx/v8/Brain_Cerebellar_Hemisphere:GTEx/v8/Brain_Cerebellum:GTEx/v8/Brain_Cortex:GTEx/v8/Brain_Frontal_Cortex_BA9:GTEx/v8/Brain_Hypothalamus:GTEx/v8/Brain_Nucleus_accumbe…	NA	3.64e-10	rs4713177	22
ENSG00000137338	PGBD1	6	28249314	28270326	1	protein_coding	84547	PGBD1	1.47e-05	-0.0800605	245	1.02e-07	5.42e-06	GTEx/v8/Adipose_Visceral_Omentum:GTEx/v8/Brain_Caudate_basal_ganglia:GTEx/v8/Brain_Cerebellar_Hemisphere:GTEx/v8/Brain_Cerebellum:GTEx/v8/Brain_Spinal_cord_cervical_c-1:GTEx/v8/Colon_Sigmoid:GTEx/v8/Nerve_Tibial:GTEx/v8/Skin_Not_Sun_Exposed_Suprapubic:GTEx/v8/Skin_Sun_Exposed_Lower_leg:GTEx/v8/Testis:GTEx/v8/Thyroid	NA	1.04e-09	rs4713177	22
ENSG00000270326	RP5-874C20.6	6	28287437	28287629	-1	pseudogene	NA	NA	NA	NA	156	5.76e-05	0.0234672	GTEx/v8/Brain_Cerebellar_Hemisphere	NA	1.2e-09	rs4713177	22
ENSG00000235109	ZSCAN31	6	28292470	28324048	-1	protein_coding	64288	ZSCAN31	3.77e-09	1.10713	337	3.72e-30	7.05e-48	GTEx/v8/Adipose_Subcutaneous:GTEx/v8/Adipose_Visceral_Omentum:GTEx/v8/Artery_Coronary:GTEx/v8/Brain_Amygdala:GTEx/v8/Brain_Anterior_cingulate_cortex_BA24:GTEx/v8/Brain_Caudate_basal_ganglia:GTEx/v8/Brain_Cortex:GTEx/v8/Brain_Frontal_Cortex_BA9:GTEx/v8/Brain_Hippocampus:GTEx/v8/Brain_Hypothalamus:GTEx/v8/Brain_Nucleus_accumbens_basal_ganglia:GTEx/v8/Brain_Putamen_basal_ganglia:GTEx/v8/Brain_Spinal…	NA	3.64e-10	rs4713177	22
ENSG00000189298	ZKSCAN3	6	28317691	28336947	1	protein_coding	80317	ZKSCAN3	0.000122608	-0.652443	336	3.79e-12	4.19e-16	GTEx/v8/Adipose_Subcutaneous:GTEx/v8/Whole_Blood:GTEx/v8/Artery_Aorta:GTEx/v8/Artery_Tibial:GTEx/v8/Breast_Mammary_Tissue:GTEx/v8/Colon_Sigmoid:GTEx/v8/Esophagus_Gastroesophageal_Junction:GTEx/v8/Esophagus_Muscularis:GTEx/v8/Heart_Atrial_Appendage:GTEx/v8/Lung:GTEx/v8/Muscle_Skeletal:GTEx/v8/Nerve_Tibial:GTEx/v8/Ovary:GTEx/v8/Pancreas:GTEx/v8/Skin_Not_Sun_Exposed_Suprapubic:GTEx/v8/Skin_Sun_Expos…	NA	3.64e-10	rs4713177	22
ENSG00000158691	ZSCAN12	6	28346732	28367511	-1	protein_coding	9753	ZSCAN12	1.44e-05	NA	1	0.00032368	6.46e-06	GTEx/v8/Artery_Tibial:GTEx/v8/Skin_Sun_Exposed_Lower_leg	NA	2.5e-05	rs4713177	22
ENSG00000187987	ZSCAN23	6	28399707	28411279	-1	protein_coding	222696	ZSCAN23	0.00270295	0.0706565	344	3.73e-15	5.07e-55	GTEx/v8/Adipose_Subcutaneous:GTEx/v8/Adipose_Visceral_Omentum:GTEx/v8/Adrenal_Gland:GTEx/v8/Artery_Aorta:GTEx/v8/Artery_Tibial:GTEx/v8/Brain_Cerebellar_Hemisphere:GTEx/v8/Brain_Cerebellum:GTEx/v8/Brain_Cortex:GTEx/v8/Brain_Spinal_cord_cervical_c-1:GTEx/v8/Breast_Mammary_Tissue:GTEx/v8/Colon_Sigmoid:GTEx/v8/Esophagus_Gastroesophageal_Junction:GTEx/v8/Esophagus_Mucosa:GTEx/v8/Esophagus_Muscularis:G…	NA	3.64e-10	rs4713177	22
ENSG00000232040	SCAND3	6	28539407	28583989	-1	protein_coding	114821	SCAND3	9.71e-09	-0.785031	6	4.07e-05	0.00030578	GTEx/v8/Artery_Tibial:GTEx/v8/Brain_Hippocampus	NA	8.34e-09	rs4713177	22
ENSG00000235570	LINC00533	6	28616063	28616843	-1	lincRNA	387055	LINC00533	NA	NA	5	2.95e-05	0.00376228	GTEx/v8/Brain_Cerebellar_Hemisphere	NA	0.002615	rs4713177	22
ENSG00000225173	XXbac-BPG308K3.5	6	28805646	28806783	-1	lincRNA	NA	NA	NA	NA	25	3.67e-05	0.0285075	GTEx/v8/Brain_Putamen_basal_ganglia	NA	4.87e-07	rs4713177	22
ENSG00000225595	XXbac-BPG308K3.6	6	28827402	28832407	-1	lincRNA	401242	LINC01623	NA	NA	302	1.85e-19	4.69e-14	GTEx/v8/Testis	NA	3.64e-10	rs4713177	22
ENSG00000204713	TRIM27	6	28870779	28891766	-1	protein_coding	5987	TRIM27	0.878752	-0.142068	280	3.63e-14	7.48e-55	GTEx/v8/Adipose_Subcutaneous:GTEx/v8/Adipose_Visceral_Omentum:GTEx/v8/Esophagus_Mucosa:GTEx/v8/Muscle_Skeletal:GTEx/v8/Skin_Not_Sun_Exposed_Suprapubic:GTEx/v8/Skin_Sun_Exposed_Lower_leg:GTEx/v8/Stomach:GTEx/v8/Testis	NA	3.64e-10	rs4713177	22
ENSG00000204709	C6orf100	6	28911654	28912314	1	protein_coding	729583	C6orf100	NA	NA	3	5.99e-05	0.00637638	GTEx/v8/Brain_Cortex	NA	2.63e-09	rs4713177	22
ENSG00000197935	ZNF311	6	28962562	28973093	-1	protein_coding	282890	ZNF311	0.000129446	0.377858	4	1.97e-08	1.15e-17	GTEx/v8/Adipose_Subcutaneous:GTEx/v8/Artery_Tibial:GTEx/v8/Esophagus_Muscularis:GTEx/v8/Nerve_Tibial:GTEx/v8/Cells_Cultured_fibroblasts:GTEx/v8/Small_Intestine_Terminal_Ileum	NA	4.44e-08	rs4713177	22
ENSG00000230598	OR2H4P	6	29183013	29183956	1	pseudogene	442189	OR2H4P	NA	NA	204	2.18e-09	6.53e-19	GTEx/v8/Testis	NA	3.64e-10	rs4713177	22
ENSG00000204695	OR14J1	6	29274403	29275519	1	protein_coding	442191	OR14J1	8.02e-08	1.33547	1	9.78e-05	1.33e-10	GTEx/v8/Testis	NA	8.34e-09	rs4713177	22
ENSG00000229274	XXbac-BPG13B8.10	6	29465286	29478333	1	lincRNA	105375009	LOC105375009	NA	NA	158	8.29e-11	5.7e-07	GTEx/v8/Adipose_Visceral_Omentum:GTEx/v8/Breast_Mammary_Tissue:GTEx/v8/Esophagus_Gastroesophageal_Junction:GTEx/v8/Esophagus_Muscularis:GTEx/v8/Nerve_Tibial:GTEx/v8/Minor_Salivary_Gland:GTEx/v8/Skin_Not_Sun_Exposed_Suprapubic	NA	3.64e-10	rs4713177	22
ENSG00000204681	GABBR1	6	29523406	29601753	-1	protein_coding	2550	GABBR1	0.99997	0.238892	51	6.2e-05	1.26e-08	GTEx/v8/Whole_Blood:GTEx/v8/Thyroid	NA	1.69e-09	rs4713177	22
ENSG00000204657	OR2H2	6	29555683	29556745	1	protein_coding	7932	OR2H2	0.0899459	0.696836	158	1.16e-09	1.93e-11	GTEx/v8/Whole_Blood:GTEx/v8/Heart_Atrial_Appendage:GTEx/v8/Heart_Left_Ventricle:GTEx/v8/Skin_Not_Sun_Exposed_Suprapubic	NA	3.64e-10	rs4713177	22
ENSG00000235238	SUMO2P1	6	29603837	29604120	-1	pseudogene	285829	SUMO2P1	NA	NA	1	0.00011141	0.0106225	GTEx/v8/Heart_Left_Ventricle	NA	0.006777	rs4713177	22
ENSG00000112139	MDGA1	6	37600284	37667082	-1	protein_coding	266727	MDGA1	0.995237	2.07709	1	4.63e-06	3.92e-103	GTEx/v8/Skin_Sun_Exposed_Lower_leg	NA	4.22e-06	rs2014208	23
ENSG00000112249	ASCC3	6	100956070	101329248	-1	protein_coding	10973	ASCC3	1.43e-10	0.106686	315	7.36e-37	6.65e-45	GTEx/v8/Artery_Aorta:GTEx/v8/Artery_Coronary:GTEx/v8/Artery_Tibial:GTEx/v8/Brain_Caudate_basal_ganglia:GTEx/v8/Brain_Cerebellum:GTEx/v8/Brain_Cortex:GTEx/v8/Esophagus_Mucosa:GTEx/v8/Liver:GTEx/v8/Nerve_Tibial:GTEx/v8/Ovary:GTEx/v8/Pancreas:GTEx/v8/Cells_Cultured_fibroblasts:GTEx/v8/Skin_Not_Sun_Exposed_Suprapubic:GTEx/v8/Skin_Sun_Exposed_Lower_leg:GTEx/v8/Thyroid	NA	6.14e-09	rs9322076;rs7753317;rs7769142	24
ENSG00000260000	RP3-467N11.1	6	101329347	101330863	1	antisense	NA	NA	NA	NA	164	3.29e-06	0.00025875	GTEx/v8/Artery_Tibial:GTEx/v8/Brain_Anterior_cingulate_cortex_BA24:GTEx/v8/Brain_Cerebellum:GTEx/v8/Brain_Nucleus_accumbens_basal_ganglia:GTEx/v8/Pituitary:GTEx/v8/Skin_Not_Sun_Exposed_Suprapubic:GTEx/v8/Skin_Sun_Exposed_Lower_leg	NA	6.14e-09	rs7753317;rs9322076;rs7769142	24
ENSG00000164418	GRIK2	6	101846664	102517958	1	protein_coding	2898	GRIK2	0.994568	-0.622432	271	5.2e-15	1.32e-13	GTEx/v8/Adipose_Subcutaneous:GTEx/v8/Artery_Aorta:GTEx/v8/Artery_Tibial:GTEx/v8/Breast_Mammary_Tissue:GTEx/v8/Lung:GTEx/v8/Pancreas:GTEx/v8/Cells_Cultured_fibroblasts:GTEx/v8/Testis	NA	6.14e-09	rs9322076;rs7753317;rs7769142	24
ENSG00000085382	HACE1	6	105175968	105307794	-1	protein_coding	57531	HACE1	0.00159566	-0.519621	68	5.8e-10	1.51e-21	GTEx/v8/Adipose_Subcutaneous:GTEx/v8/Adipose_Visceral_Omentum:GTEx/v8/Adrenal_Gland:GTEx/v8/Artery_Aorta:GTEx/v8/Brain_Cerebellar_Hemisphere:GTEx/v8/Brain_Cerebellum:GTEx/v8/Brain_Cortex:GTEx/v8/Brain_Frontal_Cortex_BA9:GTEx/v8/Brain_Nucleus_accumbens_basal_ganglia:GTEx/v8/Brain_Putamen_basal_ganglia:GTEx/v8/Esophagus_Muscularis:GTEx/v8/Heart_Left_Ventricle:GTEx/v8/Muscle_Skeletal:GTEx/v8/Nerve_T…	NA	1.24e-09	rs370771;rs395523	25
ENSG00000203809	LINC00577	6	105384169	105388402	-1	lincRNA	100113403	LINC00577	NA	NA	68	7.37e-08	0.0004001	GTEx/v8/Brain_Caudate_basal_ganglia:GTEx/v8/Brain_Cortex:GTEx/v8/Brain_Putamen_basal_ganglia:GTEx/v8/Pituitary	NA	1.24e-09	rs370771;rs395523	25
ENSG00000187772	LIN28B	6	105404923	105531207	1	protein_coding	389421	LIN28B	0.721962	-1.01937	68	1.96e-15	7.99e-11	GTEx/v8/Pituitary	NA	1.24e-09	rs370771;rs395523	25
ENSG00000112276	BVES	6	105544697	105585049	-1	protein_coding	11149	BVES	0.000308543	5.85211	1	0.00017066	1.67e-17	GTEx/v8/Thyroid	NA	NA	rs395523	25
ENSG00000231628	RP3-355L5.4	6	105726891	105729630	1	antisense	NA	NA	NA	NA	1	0.00012397	1.59e-13	GTEx/v8/Adipose_Subcutaneous	NA	2.52e-09	rs395523	25
ENSG00000239857	GET4	7	916189	936073	1	protein_coding	51608	GET4	0.972149	-0.202771	3	5.02e-05	0.00024938	GTEx/v8/Nerve_Tibial	NA	7.28e-09	rs7809203	26
ENSG00000273151	RP11-449P15.2	7	919427	926184	-1	antisense	NA	NA	NA	NA	51	1.43e-16	4.85e-12	GTEx/v8/Nerve_Tibial	NA	2.18e-09	rs7809203;rs6945202	26
ENSG00000105963	ADAP1	7	937540	995043	-1	protein_coding	11033	ADAP1	0.657927	NA	67	3.29e-29	1.02e-23	GTEx/v8/Whole_Blood:GTEx/v8/Esophagus_Muscularis:GTEx/v8/Nerve_Tibial:GTEx/v8/Skin_Not_Sun_Exposed_Suprapubic:GTEx/v8/Skin_Sun_Exposed_Lower_leg:GTEx/v8/Testis	NA	2.18e-09	rs7809203;rs6945202	26
ENSG00000240230	COX19	7	938415	1015235	-1	protein_coding	90639	COX19	0.000108651	1.39868	67	2.02e-44	1.43e-38	GTEx/v8/Adipose_Subcutaneous:GTEx/v8/Artery_Tibial:GTEx/v8/Esophagus_Muscularis:GTEx/v8/Nerve_Tibial:GTEx/v8/Skin_Not_Sun_Exposed_Suprapubic:GTEx/v8/Skin_Sun_Exposed_Lower_leg	NA	2.18e-09	rs7809203;rs6945202	26
ENSG00000073067	CYP2W1	7	1022835	1029276	1	protein_coding	54905	CYP2W1	0.000980916	NA	67	2.59e-107	5.55e-96	GTEx/v8/Colon_Transverse:GTEx/v8/Esophagus_Mucosa:GTEx/v8/Nerve_Tibial:GTEx/v8/Ovary:GTEx/v8/Minor_Salivary_Gland:GTEx/v8/Skin_Not_Sun_Exposed_Suprapubic:GTEx/v8/Skin_Sun_Exposed_Lower_leg	NA	2.18e-09	rs7809203;rs6945202	26
ENSG00000146540	C7orf50	7	1036622	1177896	-1	protein_coding	84310	C7orf50	0.00139621	1.0724	67	8.46e-11	2.56e-13	GTEx/v8/Artery_Tibial:GTEx/v8/Esophagus_Muscularis:GTEx/v8/Heart_Left_Ventricle:GTEx/v8/Muscle_Skeletal:GTEx/v8/Pancreas:GTEx/v8/Testis:GTEx/v8/Thyroid	NA	2.18e-09	rs7809203;rs6945202	26
ENSG00000225146	AC073957.15	7	1068661	1083527	1	antisense	NA	NA	NA	NA	25	7.3e-06	9.32e-05	GTEx/v8/Brain_Cerebellar_Hemisphere:GTEx/v8/Pituitary	NA	5.37e-09	rs7809203;rs6945202	26
ENSG00000164849	GPR146	7	1084212	1098897	1	protein_coding	115330	GPR146	0.00279413	0.3554	67	5.3e-15	7.5e-45	GTEx/v8/Whole_Blood:GTEx/v8/Artery_Tibial:GTEx/v8/Brain_Cerebellar_Hemisphere:GTEx/v8/Brain_Cerebellum:GTEx/v8/Colon_Sigmoid:GTEx/v8/Heart_Left_Ventricle:GTEx/v8/Nerve_Tibial	NA	2.18e-09	rs7809203;rs6945202	26
ENSG00000224079	AC091729.7	7	1114086	1117672	1	antisense	NA	NA	NA	NA	67	4.52e-18	3.33e-80	GTEx/v8/Adipose_Subcutaneous:GTEx/v8/Brain_Caudate_basal_ganglia:GTEx/v8/Brain_Cerebellar_Hemisphere:GTEx/v8/Brain_Cerebellum:GTEx/v8/Breast_Mammary_Tissue:GTEx/v8/Esophagus_Mucosa:GTEx/v8/Lung:GTEx/v8/Nerve_Tibial:GTEx/v8/Skin_Not_Sun_Exposed_Suprapubic:GTEx/v8/Skin_Sun_Exposed_Lower_leg:GTEx/v8/Testis:GTEx/v8/Thyroid	NA	2.18e-09	rs7809203;rs6945202	26
ENSG00000226291	AC091729.8	7	1120499	1121814	1	antisense	NA	NA	NA	NA	36	8.58e-13	1.12e-08	GTEx/v8/Testis	NA	5.37e-09	rs7809203;rs6945202	26
ENSG00000164850	GPER1	7	1121844	1133451	1	protein_coding	2852	GPER1	0.725421	0.809124	67	2.85e-22	2.18e-19	GTEx/v8/Adipose_Subcutaneous:GTEx/v8/Adipose_Visceral_Omentum:GTEx/v8/Artery_Aorta:GTEx/v8/Breast_Mammary_Tissue:GTEx/v8/Nerve_Tibial:GTEx/v8/Skin_Not_Sun_Exposed_Suprapubic:GTEx/v8/Skin_Sun_Exposed_Lower_leg:GTEx/v8/Testis:GTEx/v8/Thyroid	NA	2.18e-09	rs7809203;rs6945202	26
ENSG00000178381	ZFAND2A	7	1191707	1200395	-1	protein_coding	90637	ZFAND2A	0.000389857	NA	67	8.23e-101	2.54e-111	GTEx/v8/Adipose_Subcutaneous:GTEx/v8/Adipose_Visceral_Omentum:GTEx/v8/Adrenal_Gland:GTEx/v8/Cells_EBV-transformed_lymphocytes:GTEx/v8/Whole_Blood:GTEx/v8/Artery_Aorta:GTEx/v8/Artery_Coronary:GTEx/v8/Artery_Tibial:GTEx/v8/Brain_Spinal_cord_cervical_c-1:GTEx/v8/Breast_Mammary_Tissue:GTEx/v8/Colon_Sigmoid:GTEx/v8/Colon_Transverse:GTEx/v8/Esophagus_Gastroesophageal_Junction:GTEx/v8/Esophagus_Mucosa:G…	NA	2.18e-09	rs7809203;rs6945202	26
ENSG00000229043	AC091729.9	7	1200010	1204903	1	antisense	NA	NA	NA	NA	67	5.61e-149	1.82e-182	GTEx/v8/Adipose_Subcutaneous:GTEx/v8/Adipose_Visceral_Omentum:GTEx/v8/Adrenal_Gland:GTEx/v8/Cells_EBV-transformed_lymphocytes:GTEx/v8/Whole_Blood:GTEx/v8/Artery_Aorta:GTEx/v8/Artery_Coronary:GTEx/v8/Artery_Tibial:GTEx/v8/Brain_Amygdala:GTEx/v8/Brain_Anterior_cingulate_cortex_BA24:GTEx/v8/Brain_Caudate_basal_ganglia:GTEx/v8/Brain_Cerebellar_Hemisphere:GTEx/v8/Brain_Cerebellum:GTEx/v8/Brain_Cortex:…	NA	2.18e-09	rs7809203;rs6945202	26
ENSG00000225968	ELFN1	7	1727755	1787590	1	protein_coding	392617	ELFN1	0.699066	-0.0225181	10	2.73e-06	1.19e-08	GTEx/v8/Cells_Cultured_fibroblasts	NA	1.49e-08	rs11773627;rs11760737	27
ENSG00000176349	AC110781.3	7	1878222	1889567	1	protein_coding	NA	NA	NA	NA	37	3.26e-07	2.61e-06	GTEx/v8/Brain_Nucleus_accumbens_basal_ganglia:GTEx/v8/Pituitary	NA	1.49e-08	rs11773627;rs11760737	27
ENSG00000122687	FTSJ2	7	2273866	2281840	-1	protein_coding	29960	FTSJ2	1.97e-05	0.0965957	51	1.66e-07	5.42e-21	GTEx/v8/Whole_Blood:GTEx/v8/Artery_Tibial:GTEx/v8/Brain_Caudate_basal_ganglia:GTEx/v8/Brain_Cerebellar_Hemisphere:GTEx/v8/Breast_Mammary_Tissue:GTEx/v8/Esophagus_Mucosa:GTEx/v8/Lung:GTEx/v8/Nerve_Tibial:GTEx/v8/Cells_Cultured_fibroblasts:GTEx/v8/Skin_Not_Sun_Exposed_Suprapubic	NA	1.49e-08	rs11773627;rs11760737	27
ENSG00000128573	FOXP2	7	113726382	114333827	1	protein_coding	93986	FOXP2	0.996179	-0.404517	49	1.42e-11	3.01e-14	GTEx/v8/Adipose_Subcutaneous:GTEx/v8/Adrenal_Gland:GTEx/v8/Artery_Coronary:GTEx/v8/Pituitary	NA	7.58e-09	rs10953758	31
ENSG00000135272	MDFIC	7	114562209	114659256	1	protein_coding	29969	MDFIC	NA	-1.32194	18	2.37e-05	1.67e-06	GTEx/v8/Colon_Sigmoid:GTEx/v8/Heart_Atrial_Appendage:GTEx/v8/Skin_Sun_Exposed_Lower_leg	NA	2.55e-08	rs10953758	31
ENSG00000272479	RP11-301G7.1	8	40377084	40377677	-1	lincRNA	NA	NA	NA	NA	63	1.36e-09	2.05e-07	GTEx/v8/Brain_Caudate_basal_ganglia:GTEx/v8/Brain_Cortex:GTEx/v8/Brain_Frontal_Cortex_BA9:GTEx/v8/Pituitary:GTEx/v8/Thyroid	NA	4.01e-09	rs2722442;rs11783990	32
ENSG00000165061	ZMAT4	8	40388109	40755352	-1	protein_coding	79698	ZMAT4	0.0193269	-0.445555	55	5.28e-24	4.91e-23	GTEx/v8/Artery_Tibial:GTEx/v8/Cells_Cultured_fibroblasts	NA	4.01e-09	rs2722442	32
ENSG00000164830	OXR1	8	107282473	107764922	1	protein_coding	55074	OXR1	0.488534	0.23532	33	3.68e-07	1.46e-33	GTEx/v8/Adipose_Visceral_Omentum:GTEx/v8/Artery_Tibial:GTEx/v8/Cells_Cultured_fibroblasts:GTEx/v8/Skin_Sun_Exposed_Lower_leg	NA	2.91e-08	rs776935	33
ENSG00000164796	CSMD3	8	113235157	114449328	-1	protein_coding	114788	CSMD3	1	0.201288	4	0.00032501	0.00147995	GTEx/v8/Nerve_Tibial	NA	1.11e-06	rs62519760	34
ENSG00000165238	WNK2	9	95947198	96082854	1	protein_coding	65268	WNK2	0.792762	NA	77	6.42e-06	3.64e-23	GTEx/v8/Skin_Sun_Exposed_Lower_leg:GTEx/v8/Thyroid	NA	3.92e-12	rs10156602;rs7851271	35
ENSG00000204352	C9orf129	9	96080481	96108696	-1	protein_coding	445577	C9orf129	0.375839	-0.0524508	1	0.00015599	4.88e-25	GTEx/v8/Testis	NA	3.53e-08	rs10156602	35
ENSG00000227603	RP11-165J3.6	9	96197614	96199403	-1	antisense	NA	NA	NA	NA	11	1.49e-12	9.01e-58	GTEx/v8/Adipose_Subcutaneous:GTEx/v8/Adipose_Visceral_Omentum:GTEx/v8/Adrenal_Gland:GTEx/v8/Whole_Blood:GTEx/v8/Brain_Cerebellum:GTEx/v8/Breast_Mammary_Tissue:GTEx/v8/Colon_Transverse:GTEx/v8/Esophagus_Gastroesophageal_Junction:GTEx/v8/Esophagus_Mucosa:GTEx/v8/Esophagus_Muscularis:GTEx/v8/Heart_Atrial_Appendage:GTEx/v8/Heart_Left_Ventricle:GTEx/v8/Liver:GTEx/v8/Lung:GTEx/v8/Muscle_Skeletal:GTEx/v…	NA	3.63e-06	rs10156602;rs7851271	35
ENSG00000188938	FAM120AOS	9	96208776	96215874	-1	protein_coding	158293	FAM120AOS	0.514391	0.00743144	107	1.55e-07	0.00020296	GTEx/v8/Adipose_Visceral_Omentum:GTEx/v8/Brain_Cerebellum:GTEx/v8/Breast_Mammary_Tissue:GTEx/v8/Colon_Sigmoid:GTEx/v8/Colon_Transverse:GTEx/v8/Esophagus_Mucosa:GTEx/v8/Esophagus_Muscularis:GTEx/v8/Lung:GTEx/v8/Nerve_Tibial:GTEx/v8/Skin_Not_Sun_Exposed_Suprapubic	NA	3.92e-12	rs10156602;rs7851271	35
ENSG00000048828	FAM120A	9	96214004	96328397	1	protein_coding	23196	FAM120A	0.999907	-0.298117	6	7.13e-05	0.0429246	GTEx/v8/Esophagus_Muscularis	NA	5.27e-12	rs10156602;rs7851271;rs7033146	35
ENSG00000197724	PHF2	9	96338689	96441869	1	protein_coding	5253	PHF2	0.994132	0.745198	9	0.00010813	0.0246476	GTEx/v8/Testis	NA	1.47e-11	rs7851271	35
ENSG00000148110	HIATL1	9	97136833	97223324	1	protein_coding	84641	HIATL1	0.0239502	-0.606655	9	3.29e-05	0.00154759	GTEx/v8/Brain_Anterior_cingulate_cortex_BA24	NA	4.16e-12	rs10156602	35
ENSG00000136869	TLR4	9	120466610	120479149	1	protein_coding	7099	TLR4	4.18e-06	-0.800744	37	3.54e-23	1.98e-64	GTEx/v8/Whole_Blood	NA	6.44e-09	rs10818076;rs7357627	36
ENSG00000166169	POLL	10	103338639	103348027	-1	protein_coding	27343	POLL	2.25e-11	-0.585736	1	1.98e-05	0.0252825	GTEx/v8/Colon_Transverse	NA	0.0003313	rs12767131	37
ENSG00000269609	RP11-18I14.10	10	104209574	104220863	1	processed_transcript	100505761	RPARP-AS1	NA	NA	1	8.68e-05	1.4e-06	GTEx/v8/Whole_Blood	NA	NA	rs12767131	37
ENSG00000120055	C10orf95	10	104209594	104211300	-1	protein_coding	79946	C10orf95	0.0113912	-0.659448	1	0.00021712	0.0493852	GTEx/v8/Nerve_Tibial	NA	0.0003313	rs12767131	37
ENSG00000138111	TMEM180	10	104221149	104236802	1	protein_coding	79847	TMEM180	0.000178664	2.88275	51	8.67e-24	3.01e-93	GTEx/v8/Adipose_Subcutaneous:GTEx/v8/Adipose_Visceral_Omentum:GTEx/v8/Artery_Aorta:GTEx/v8/Artery_Tibial:GTEx/v8/Brain_Cerebellar_Hemisphere:GTEx/v8/Brain_Cerebellum:GTEx/v8/Breast_Mammary_Tissue:GTEx/v8/Colon_Sigmoid:GTEx/v8/Esophagus_Gastroesophageal_Junction:GTEx/v8/Esophagus_Muscularis:GTEx/v8/Heart_Atrial_Appendage:GTEx/v8/Heart_Left_Ventricle:GTEx/v8/Liver:GTEx/v8/Lung:GTEx/v8/Nerve_Tibial:…	NA	6.35e-13	rs12767131;rs10509759	37
ENSG00000138107	ACTR1A	10	104238986	104262482	-1	protein_coding	10121	ACTR1A	0.941234	-0.272535	17	1.42e-08	2.85e-08	GTEx/v8/Brain_Caudate_basal_ganglia:GTEx/v8/Brain_Putamen_basal_ganglia:GTEx/v8/Brain_Spinal_cord_cervical_c-1:GTEx/v8/Colon_Sigmoid	NA	2.58e-09	rs12767131	37
ENSG00000107882	SUFU	10	104263744	104393292	1	protein_coding	51684	SUFU	0.999161	0.12486	17	2.38e-06	1.18e-07	GTEx/v8/Artery_Tibial:GTEx/v8/Esophagus_Mucosa:GTEx/v8/Cells_Cultured_fibroblasts:GTEx/v8/Testis	NA	2.58e-09	rs12767131	37
ENSG00000272933	RP11-47A8.5	10	104402549	104403897	-1	lincRNA	NA	NA	NA	NA	4	7.75e-06	3.51e-05	GTEx/v8/Brain_Caudate_basal_ganglia:GTEx/v8/Brain_Nucleus_accumbens_basal_ganglia:GTEx/v8/Muscle_Skeletal:GTEx/v8/Skin_Sun_Exposed_Lower_leg	NA	0.0001612	rs12767131	37
ENSG00000171206	TRIM8	10	104404253	104418164	1	protein_coding	81603	TRIM8	0.992012	-0.52129	17	2.76e-08	5.13e-08	GTEx/v8/Adipose_Subcutaneous:GTEx/v8/Breast_Mammary_Tissue:GTEx/v8/Esophagus_Mucosa:GTEx/v8/Heart_Left_Ventricle:GTEx/v8/Skin_Sun_Exposed_Lower_leg	NA	2.58e-09	rs12767131	37
ENSG00000138175	ARL3	10	104433488	104474164	-1	protein_coding	403	ARL3	0.716101	-0.600026	74	5.84e-08	5.8e-19	GTEx/v8/Adipose_Subcutaneous:GTEx/v8/Adipose_Visceral_Omentum:GTEx/v8/Artery_Aorta:GTEx/v8/Artery_Coronary:GTEx/v8/Artery_Tibial:GTEx/v8/Brain_Cerebellum:GTEx/v8/Colon_Transverse:GTEx/v8/Esophagus_Mucosa:GTEx/v8/Lung:GTEx/v8/Muscle_Skeletal:GTEx/v8/Nerve_Tibial:GTEx/v8/Cells_Cultured_fibroblasts:GTEx/v8/Skin_Not_Sun_Exposed_Suprapubic	NA	6.35e-13	rs10509759;rs12767131	37
ENSG00000156398	SFXN2	10	104474295	104503249	1	protein_coding	118980	SFXN2	0.00108457	-0.837011	58	4.77e-17	6.21e-50	GTEx/v8/Adipose_Subcutaneous:GTEx/v8/Adipose_Visceral_Omentum:GTEx/v8/Cells_EBV-transformed_lymphocytes:GTEx/v8/Breast_Mammary_Tissue:GTEx/v8/Colon_Sigmoid:GTEx/v8/Colon_Transverse:GTEx/v8/Esophagus_Mucosa:GTEx/v8/Esophagus_Muscularis:GTEx/v8/Heart_Atrial_Appendage:GTEx/v8/Lung:GTEx/v8/Nerve_Tibial:GTEx/v8/Pancreas:GTEx/v8/Cells_Cultured_fibroblasts:GTEx/v8/Skin_Not_Sun_Exposed_Suprapubic:GTEx/v8…	NA	6.35e-13	rs10509759	37
ENSG00000166272	WBP1L	10	104503727	104576021	1	protein_coding	54838	WBP1L	0.909387	0.61464	58	1.88e-12	4.99e-13	GTEx/v8/Adipose_Subcutaneous:GTEx/v8/Artery_Tibial:GTEx/v8/Colon_Transverse:GTEx/v8/Muscle_Skeletal:GTEx/v8/Testis:GTEx/v8/Thyroid	NA	6.35e-13	rs10509759	37
ENSG00000203886	CYP17A1-AS1	10	104592478	104594273	1	antisense	102724307	CYP17A1-AS1	NA	NA	58	1.15e-11	6.34e-08	GTEx/v8/Brain_Cerebellum:GTEx/v8/Testis	NA	6.35e-13	rs10509759	37
ENSG00000166275	C10orf32	10	104613980	104624718	1	protein_coding	119032	C10orf32	0.0316379	0.490358	56	6.61e-07	9.74e-18	GTEx/v8/Whole_Blood:GTEx/v8/Pancreas	NA	6.35e-13	rs10509759	37
ENSG00000214435	AS3MT	10	104629273	104661656	1	protein_coding	57412	AS3MT	5.09e-07	0.726881	63	1.99e-14	1.36e-107	GTEx/v8/Adipose_Subcutaneous:GTEx/v8/Whole_Blood:GTEx/v8/Brain_Caudate_basal_ganglia:GTEx/v8/Brain_Cerebellum:GTEx/v8/Brain_Hypothalamus:GTEx/v8/Esophagus_Gastroesophageal_Junction:GTEx/v8/Esophagus_Muscularis:GTEx/v8/Muscle_Skeletal:GTEx/v8/Pancreas:GTEx/v8/Pituitary:GTEx/v8/Skin_Not_Sun_Exposed_Suprapubic:GTEx/v8/Skin_Sun_Exposed_Lower_leg:GTEx/v8/Thyroid	NA	6.35e-13	rs12767131;rs10509759	37
ENSG00000272912	RP11-724N1.1	10	104674342	104675161	1	lincRNA	NA	NA	NA	NA	1	8.16e-05	3.13e-16	GTEx/v8/Brain_Cerebellum	NA	8.5e-12	rs10509759	37
ENSG00000148842	CNNM2	10	104678050	104849978	1	protein_coding	54805	CNNM2	0.994106	-0.511524	54	2.23e-06	0.00023971	GTEx/v8/Artery_Tibial:GTEx/v8/Brain_Cerebellum:GTEx/v8/Brain_Frontal_Cortex_BA9	NA	6.35e-13	rs10509759	37
ENSG00000076685	NT5C2	10	104845940	104953056	-1	protein_coding	22978	NT5C2	0.0521979	0.0483286	58	1.3e-14	4.75e-15	GTEx/v8/Whole_Blood:GTEx/v8/Artery_Tibial:GTEx/v8/Brain_Cortex:GTEx/v8/Brain_Hippocampus:GTEx/v8/Esophagus_Muscularis:GTEx/v8/Testis	NA	6.35e-13	rs10509759	37
ENSG00000213277	MARCKSL1P1	10	104935311	104935851	1	pseudogene	100913183	MARCKSL1P1	NA	NA	58	2.81e-16	3.99e-12	GTEx/v8/Adipose_Subcutaneous:GTEx/v8/Adipose_Visceral_Omentum:GTEx/v8/Adrenal_Gland:GTEx/v8/Cells_EBV-transformed_lymphocytes:GTEx/v8/Whole_Blood:GTEx/v8/Artery_Aorta:GTEx/v8/Artery_Coronary:GTEx/v8/Breast_Mammary_Tissue:GTEx/v8/Colon_Sigmoid:GTEx/v8/Colon_Transverse:GTEx/v8/Esophagus_Mucosa:GTEx/v8/Esophagus_Muscularis:GTEx/v8/Lung:GTEx/v8/Nerve_Tibial:GTEx/v8/Pancreas:GTEx/v8/Minor_Salivary_Gla…	NA	6.35e-13	rs10509759	37
ENSG00000148843	PDCD11	10	105156405	105206049	1	protein_coding	22984	PDCD11	0.468449	-0.805378	28	6.87e-06	7.29e-18	GTEx/v8/Adipose_Subcutaneous:GTEx/v8/Nerve_Tibial	NA	1.09e-12	rs10509759	37
ENSG00000138172	CALHM2	10	105206543	105212660	-1	protein_coding	51063	CALHM2	5.29e-07	-0.689941	56	9.47e-06	4.25e-08	GTEx/v8/Adipose_Subcutaneous:GTEx/v8/Artery_Aorta:GTEx/v8/Brain_Putamen_basal_ganglia:GTEx/v8/Colon_Sigmoid:GTEx/v8/Heart_Atrial_Appendage	NA	6.35e-13	rs10509759	37
ENSG00000247675	LRP4-AS1	11	46867963	46895947	1	antisense	100507401	LRP4-AS1	NA	NA	37	9.45e-06	8.56e-18	GTEx/v8/Nerve_Tibial:GTEx/v8/Pancreas	NA	1.25e-08	rs7111957;rs1228001	38
ENSG00000134569	LRP4	11	46878419	46940193	-1	protein_coding	4038	LRP4	0.100209	0.314362	107	3.59e-10	7.96e-54	GTEx/v8/Nerve_Tibial:GTEx/v8/Pancreas:GTEx/v8/Spleen	NA	7.6e-09	rs7111957;rs1228001	38
ENSG00000149179	C11orf49	11	46958240	47185936	1	protein_coding	79096	C11orf49	5.45e-07	0.564558	103	1.81e-10	1.12e-54	GTEx/v8/Artery_Tibial:GTEx/v8/Nerve_Tibial:GTEx/v8/Testis	NA	7.6e-09	rs7111957;rs1228001	38
ENSG00000271350	CTD-2384B9.1	11	47062578	47063496	-1	pseudogene	NA	NA	NA	NA	105	2.5e-09	2.33e-52	GTEx/v8/Testis	NA	1.24e-09	rs7111957;rs1228001	38
ENSG00000165912	PACSIN3	11	47199076	47207994	-1	protein_coding	29763	PACSIN3	0.016793	-0.514939	3	0.00020044	2.83e-14	GTEx/v8/Adipose_Subcutaneous	NA	6.69e-07	rs11040048	38
ENSG00000134575	ACP2	11	47260853	47270457	-1	protein_coding	53	ACP2	0.000525977	-0.370782	114	1.35e-09	8.11e-31	GTEx/v8/Adipose_Subcutaneous:GTEx/v8/Whole_Blood:GTEx/v8/Artery_Tibial:GTEx/v8/Brain_Cerebellum:GTEx/v8/Esophagus_Mucosa:GTEx/v8/Heart_Atrial_Appendage:GTEx/v8/Lung:GTEx/v8/Muscle_Skeletal:GTEx/v8/Nerve_Tibial:GTEx/v8/Pancreas:GTEx/v8/Pituitary:GTEx/v8/Cells_Cultured_fibroblasts:GTEx/v8/Skin_Not_Sun_Exposed_Suprapubic:GTEx/v8/Skin_Sun_Exposed_Lower_leg:GTEx/v8/Spleen:GTEx/v8/Thyroid	NA	1.24e-09	rs7111957;rs1228001;rs11040048	38
ENSG00000025434	NR1H3	11	47269851	47290396	1	protein_coding	10062	NR1H3	0.856186	0.657584	107	2.58e-09	8.7e-11	GTEx/v8/Whole_Blood:GTEx/v8/Brain_Cerebellar_Hemisphere:GTEx/v8/Nerve_Tibial:GTEx/v8/Skin_Not_Sun_Exposed_Suprapubic	NA	1.24e-09	rs7111957;rs1228001	38
ENSG00000110514	MADD	11	47290712	47351582	1	protein_coding	8567	MADD	0.000901823	-0.37505	108	2.35e-08	1.25e-23	GTEx/v8/Adipose_Subcutaneous:GTEx/v8/Brain_Cerebellar_Hemisphere:GTEx/v8/Brain_Cerebellum:GTEx/v8/Breast_Mammary_Tissue:GTEx/v8/Esophagus_Muscularis:GTEx/v8/Heart_Left_Ventricle:GTEx/v8/Lung:GTEx/v8/Pituitary:GTEx/v8/Cells_Cultured_fibroblasts:GTEx/v8/Skin_Sun_Exposed_Lower_leg:GTEx/v8/Testis	NA	1.24e-09	rs7111957;rs1228001	38
ENSG00000134571	MYBPC3	11	47352957	47374253	-1	protein_coding	4607	MYBPC3	1.35e-06	-0.432352	129	2.35e-28	4.03e-22	GTEx/v8/Adrenal_Gland:GTEx/v8/Whole_Blood:GTEx/v8/Lung:GTEx/v8/Nerve_Tibial:GTEx/v8/Spleen	NA	1.24e-09	rs7111957;rs1228001;rs11040048;rs75184591	38
ENSG00000255197	RP11-750H9.5	11	47404699	47430741	-1	antisense	NA	NA	NA	NA	84	1.79e-08	1.2e-07	GTEx/v8/Adipose_Subcutaneous:GTEx/v8/Whole_Blood:GTEx/v8/Brain_Cerebellar_Hemisphere:GTEx/v8/Brain_Cerebellum	NA	7.6e-09	rs7111957;rs1228001	38
ENSG00000165915	SLC39A13	11	47428683	47438047	1	protein_coding	91252	SLC39A13	0.011852	-0.332419	120	7.12e-17	1.13e-12	GTEx/v8/Adipose_Subcutaneous:GTEx/v8/Adipose_Visceral_Omentum:GTEx/v8/Adrenal_Gland:GTEx/v8/Whole_Blood:GTEx/v8/Artery_Aorta:GTEx/v8/Artery_Tibial:GTEx/v8/Brain_Anterior_cingulate_cortex_BA24:GTEx/v8/Brain_Caudate_basal_ganglia:GTEx/v8/Brain_Cerebellum:GTEx/v8/Brain_Cortex:GTEx/v8/Brain_Frontal_Cortex_BA9:GTEx/v8/Breast_Mammary_Tissue:GTEx/v8/Colon_Sigmoid:GTEx/v8/Colon_Transverse:GTEx/v8/Esophag…	NA	1.24e-09	rs7111957;rs1228001;rs75184591;rs11040048	38
ENSG00000165916	PSMC3	11	47440320	47447993	-1	protein_coding	5702	PSMC3	0.9792	-0.404697	160	6.17e-14	2.36e-11	GTEx/v8/Adipose_Subcutaneous:GTEx/v8/Adipose_Visceral_Omentum:GTEx/v8/Adrenal_Gland:GTEx/v8/Whole_Blood:GTEx/v8/Artery_Aorta:GTEx/v8/Artery_Tibial:GTEx/v8/Brain_Cerebellar_Hemisphere:GTEx/v8/Brain_Cerebellum:GTEx/v8/Brain_Cortex:GTEx/v8/Breast_Mammary_Tissue:GTEx/v8/Colon_Sigmoid:GTEx/v8/Colon_Transverse:GTEx/v8/Esophagus_Gastroesophageal_Junction:GTEx/v8/Esophagus_Mucosa:GTEx/v8/Esophagus_Muscul…	NA	1.24e-09	rs7111957;rs1228001;rs75184591;rs11040048	38
ENSG00000165917	RAPSN	11	47459308	47470730	-1	protein_coding	5913	RAPSN	0.0326445	0.0487816	109	2.12e-09	5.35e-12	GTEx/v8/Adipose_Subcutaneous:GTEx/v8/Adipose_Visceral_Omentum:GTEx/v8/Brain_Caudate_basal_ganglia:GTEx/v8/Brain_Cortex:GTEx/v8/Brain_Putamen_basal_ganglia:GTEx/v8/Colon_Transverse:GTEx/v8/Lung:GTEx/v8/Skin_Not_Sun_Exposed_Suprapubic:GTEx/v8/Skin_Sun_Exposed_Lower_leg:GTEx/v8/Stomach:GTEx/v8/Thyroid	NA	1.24e-09	rs7111957;rs1228001;rs11040048	38
ENSG00000149187	CELF1	11	47487496	47587121	-1	protein_coding	10658	CELF1	0.998617	-0.376216	2	0.00043483	0.00046111	GTEx/v8/Artery_Tibial	NA	0.002122	rs7111957	38
ENSG00000213619	NDUFS3	11	47586888	47606114	1	protein_coding	4722	NDUFS3	0.047137	-0.0123446	108	7.06e-13	2.75e-09	GTEx/v8/Adipose_Subcutaneous:GTEx/v8/Brain_Cerebellar_Hemisphere:GTEx/v8/Brain_Cerebellum:GTEx/v8/Esophagus_Mucosa:GTEx/v8/Cells_Cultured_fibroblasts:GTEx/v8/Thyroid	NA	1.24e-09	rs7111957;rs1228001	38
ENSG00000110536	PTPMT1	11	47586982	47595013	1	protein_coding	114971	PTPMT1	0.459152	NA	97	9.08e-06	0.0007	GTEx/v8/Artery_Tibial:GTEx/v8/Skin_Sun_Exposed_Lower_leg	NA	1.24e-09	rs1228001;rs7111957;rs11040048;rs75184591	38
ENSG00000196666	FAM180B	11	47608198	47610746	1	protein_coding	399888	FAM180B	0.315838	NA	309	1.62e-09	4.63e-06	GTEx/v8/Artery_Tibial:GTEx/v8/Brain_Caudate_basal_ganglia:GTEx/v8/Brain_Cerebellar_Hemisphere:GTEx/v8/Brain_Cerebellum:GTEx/v8/Brain_Cortex:GTEx/v8/Brain_Frontal_Cortex_BA9:GTEx/v8/Brain_Nucleus_accumbens_basal_ganglia:GTEx/v8/Brain_Putamen_basal_ganglia:GTEx/v8/Skin_Sun_Exposed_Lower_leg:GTEx/v8/Thyroid	NA	1.24e-09	rs75184591;rs11040048;rs7111957;rs1228001	38
ENSG00000172247	C1QTNF4	11	47611216	47616211	-1	protein_coding	114900	C1QTNF4	0.679081	NA	335	1.95e-82	1.17e-69	GTEx/v8/Adipose_Subcutaneous:GTEx/v8/Adipose_Visceral_Omentum:GTEx/v8/Adrenal_Gland:GTEx/v8/Cells_EBV-transformed_lymphocytes:GTEx/v8/Whole_Blood:GTEx/v8/Artery_Aorta:GTEx/v8/Artery_Coronary:GTEx/v8/Artery_Tibial:GTEx/v8/Brain_Caudate_basal_ganglia:GTEx/v8/Brain_Cerebellar_Hemisphere:GTEx/v8/Brain_Cerebellum:GTEx/v8/Brain_Cortex:GTEx/v8/Breast_Mammary_Tissue:GTEx/v8/Colon_Sigmoid:GTEx/v8/Colon_Tr…	NA	1.24e-09	rs7111957;rs1228001;rs11040048;rs75184591	38
ENSG00000109919	MTCH2	11	47638867	47664175	-1	protein_coding	23788	MTCH2	0.166788	0.0369336	372	8.07e-34	2.28e-26	GTEx/v8/Adipose_Subcutaneous:GTEx/v8/Brain_Amygdala:GTEx/v8/Brain_Anterior_cingulate_cortex_BA24:GTEx/v8/Brain_Caudate_basal_ganglia:GTEx/v8/Brain_Cerebellar_Hemisphere:GTEx/v8/Brain_Cerebellum:GTEx/v8/Brain_Cortex:GTEx/v8/Brain_Frontal_Cortex_BA9:GTEx/v8/Brain_Hippocampus:GTEx/v8/Brain_Hypothalamus:GTEx/v8/Brain_Nucleus_accumbens_basal_ganglia:GTEx/v8/Brain_Putamen_basal_ganglia:GTEx/v8/Esophagu…	NA	1.24e-09	rs7111957;rs1228001;rs11040048;rs75184591	38
ENSG00000165923	AGBL2	11	47681143	47736941	-1	protein_coding	79841	AGBL2	6.81e-12	-0.765874	3	7.09e-05	7e-06	GTEx/v8/Thyroid:GTEx/v8/Vagina	NA	1.87e-06	rs11040048;rs75184591	38
ENSG00000109920	FNBP4	11	47738072	47788995	-1	protein_coding	23360	FNBP4	0.999993	-0.713792	106	2.07e-11	3.53e-20	GTEx/v8/Esophagus_Mucosa:GTEx/v8/Muscle_Skeletal:GTEx/v8/Cells_Cultured_fibroblasts	NA	7.6e-09	rs7111957	38
ENSG00000030066	NUP160	11	47799639	47870107	-1	protein_coding	23279	NUP160	0.0239792	-0.345694	134	9.96e-09	7.78e-06	GTEx/v8/Whole_Blood:GTEx/v8/Muscle_Skeletal:GTEx/v8/Skin_Not_Sun_Exposed_Suprapubic	NA	7.6e-09	rs7111957;rs75184591;rs11040048	38
ENSG00000271557	RP11-692M12.4	11	47862876	47863234	1	pseudogene	NA	NA	NA	NA	7	0.00051709	0.00643483	GTEx/v8/Thyroid	NA	1.16e-05	rs7111957;rs1228001	38
ENSG00000149177	PTPRJ	11	48002113	48189670	1	protein_coding	5795	PTPRJ	2.39e-05	NA	654	2.59e-15	1.09e-14	GTEx/v8/Adipose_Subcutaneous:GTEx/v8/Adipose_Visceral_Omentum:GTEx/v8/Whole_Blood:GTEx/v8/Artery_Tibial:GTEx/v8/Brain_Spinal_cord_cervical_c-1:GTEx/v8/Breast_Mammary_Tissue:GTEx/v8/Colon_Sigmoid:GTEx/v8/Colon_Transverse:GTEx/v8/Esophagus_Gastroesophageal_Junction:GTEx/v8/Esophagus_Mucosa:GTEx/v8/Esophagus_Muscularis:GTEx/v8/Heart_Left_Ventricle:GTEx/v8/Lung:GTEx/v8/Nerve_Tibial:GTEx/v8/Ovary:GTEx…	NA	1.24e-09	rs1228001;rs7111957;rs11040048;rs75184591	38
ENSG00000255304	OR4A46P	11	48517900	48518832	1	pseudogene	403252	OR4A46P	NA	NA	440	1.47e-07	0.00030132	GTEx/v8/Pituitary	NA	1.04e-08	rs75184591;rs11040048	38
ENSG00000254832	OR4A40P	11	48533825	48534772	1	pseudogene	390116	OR4A40P	NA	NA	443	8.46e-08	0.00015905	GTEx/v8/Pituitary	NA	1.04e-08	rs75184591;rs11040048	38
ENSG00000086205	FOLH1	11	49168187	49230222	-1	protein_coding	2346	FOLH1	0.253397	-0.0941583	569	9.96e-30	2.78e-27	GTEx/v8/Adipose_Subcutaneous:GTEx/v8/Artery_Aorta:GTEx/v8/Artery_Coronary:GTEx/v8/Artery_Tibial:GTEx/v8/Brain_Caudate_basal_ganglia:GTEx/v8/Brain_Cerebellum:GTEx/v8/Brain_Cortex:GTEx/v8/Brain_Hypothalamus:GTEx/v8/Brain_Nucleus_accumbens_basal_ganglia:GTEx/v8/Brain_Putamen_basal_ganglia:GTEx/v8/Brain_Spinal_cord_cervical_c-1:GTEx/v8/Breast_Mammary_Tissue:GTEx/v8/Colon_Sigmoid:GTEx/v8/Colon_Transve…	NA	1.04e-08	rs11040048;rs75184591	38
ENSG00000205035	RP11-707M1.1	11	49580098	49831971	1	pseudogene	440040	LOC440040	NA	NA	66	1.13e-13	1.43e-34	GTEx/v8/Brain_Anterior_cingulate_cortex_BA24:GTEx/v8/Brain_Caudate_basal_ganglia:GTEx/v8/Brain_Cerebellum:GTEx/v8/Brain_Cortex:GTEx/v8/Brain_Frontal_Cortex_BA9:GTEx/v8/Brain_Hippocampus:GTEx/v8/Brain_Nucleus_accumbens_basal_ganglia:GTEx/v8/Brain_Putamen_basal_ganglia	NA	2.42e-08	rs11040048;rs75184591	38
ENSG00000219061	TRIM51FP	11	49854692	49860872	-1	pseudogene	283257	TRIM51FP	NA	NA	39	9.05e-10	3.69e-12	GTEx/v8/Brain_Caudate_basal_ganglia:GTEx/v8/Brain_Cortex:GTEx/v8/Brain_Frontal_Cortex_BA9	NA	2.03e-07	rs11040048;rs75184591	38
ENSG00000254714	RP11-163O19.1	11	49872181	49884080	1	pseudogene	NA	NA	NA	NA	8	2.92e-05	0.00257445	GTEx/v8/Brain_Anterior_cingulate_cortex_BA24	NA	2.26e-06	rs11040048	38
ENSG00000255190	TRIM51DP	11	49896497	49898190	1	pseudogene	100419945	TRIM51DP	NA	NA	103	3.6e-20	8.08e-23	GTEx/v8/Brain_Amygdala:GTEx/v8/Brain_Anterior_cingulate_cortex_BA24:GTEx/v8/Brain_Caudate_basal_ganglia:GTEx/v8/Brain_Cortex:GTEx/v8/Brain_Frontal_Cortex_BA9:GTEx/v8/Brain_Hippocampus:GTEx/v8/Brain_Hypothalamus:GTEx/v8/Brain_Nucleus_accumbens_basal_ganglia:GTEx/v8/Brain_Putamen_basal_ganglia	NA	2.81e-08	rs11040048;rs75184591	38
ENSG00000255111	RP11-163O19.8	11	49913814	49915329	-1	pseudogene	NA	NA	NA	NA	74	1.28e-06	5.13e-11	GTEx/v8/Testis	NA	2.81e-08	rs75184591;rs11040048	38
ENSG00000255199	RP11-227P3.1	11	50060063	50062069	-1	pseudogene	NA	NA	NA	NA	17	4.61e-11	1.79e-25	GTEx/v8/Testis	NA	6.68e-08	rs11040048;rs75184591	38
ENSG00000255042	RP11-347H15.5	11	50246832	50254505	-1	pseudogene	441601	LOC441601	NA	NA	11	2.04e-08	4.15e-34	GTEx/v8/Testis	NA	0.0001477	rs11040048	38
ENSG00000254518	RP11-347H15.4	11	50257750	50263827	1	lincRNA	NA	NA	NA	NA	11	2.82e-07	1.86e-07	GTEx/v8/Testis	NA	0.0001477	rs11040048	38
ENSG00000214883	RP11-574M7.2	11	50368213	50381487	1	pseudogene	NA	NA	NA	NA	7	1.39e-07	4.97e-10	GTEx/v8/Testis	NA	0.001929	rs11040048	38
ENSG00000149150	SLC43A1	11	57252007	57283259	-1	protein_coding	8501	SLC43A1	7.85e-05	-0.136928	12	4.46e-05	2.48e-08	GTEx/v8/Brain_Cerebellum:GTEx/v8/Pancreas	NA	1.05e-08	rs2509805	39
ENSG00000134809	TIMM10	11	57295936	57298276	-1	protein_coding	26519	TIMM10	0.00949476	0.00010008	58	8.52e-16	9.05e-86	GTEx/v8/Adipose_Subcutaneous:GTEx/v8/Adipose_Visceral_Omentum:GTEx/v8/Adrenal_Gland:GTEx/v8/Cells_EBV-transformed_lymphocytes:GTEx/v8/Whole_Blood:GTEx/v8/Artery_Aorta:GTEx/v8/Artery_Coronary:GTEx/v8/Artery_Tibial:GTEx/v8/Brain_Caudate_basal_ganglia:GTEx/v8/Breast_Mammary_Tissue:GTEx/v8/Colon_Sigmoid:GTEx/v8/Colon_Transverse:GTEx/v8/Esophagus_Gastroesophageal_Junction:GTEx/v8/Esophagus_Mucosa:GTEx…	NA	6.05e-10	rs2509805	39
ENSG00000149131	SERPING1	11	57364860	57382326	1	protein_coding	710	SERPING1	0.972837	-0.519498	58	1.74e-07	7.24e-05	GTEx/v8/Whole_Blood	NA	6.05e-10	rs2509805	39
ENSG00000254602	AP000662.4	11	57405497	57420263	1	sense_overlapping	NA	NA	NA	NA	58	1.26e-16	4.14e-12	GTEx/v8/Adipose_Visceral_Omentum:GTEx/v8/Artery_Aorta:GTEx/v8/Esophagus_Muscularis:GTEx/v8/Thyroid	NA	6.05e-10	rs2509805	39
ENSG00000166793	YPEL4	11	57412560	57417417	-1	protein_coding	219539	YPEL4	0.805555	-2.01157	58	9.89e-08	4.6e-18	GTEx/v8/Adipose_Subcutaneous:GTEx/v8/Colon_Transverse:GTEx/v8/Lung:GTEx/v8/Skin_Not_Sun_Exposed_Suprapubic:GTEx/v8/Skin_Sun_Exposed_Lower_leg	NA	6.05e-10	rs2509805	39
ENSG00000172409	CLP1	11	57416465	57429340	1	protein_coding	10978	CLP1	0.937605	-0.832603	55	1.93e-06	0.00202672	GTEx/v8/Whole_Blood	NA	6.05e-10	rs2509805	39
ENSG00000156599	ZDHHC5	11	57435219	57468659	1	protein_coding	25921	ZDHHC5	0.999924	-0.831025	58	7.37e-15	1.41e-10	GTEx/v8/Adipose_Subcutaneous:GTEx/v8/Adipose_Visceral_Omentum:GTEx/v8/Whole_Blood:GTEx/v8/Artery_Tibial:GTEx/v8/Heart_Atrial_Appendage:GTEx/v8/Heart_Left_Ventricle:GTEx/v8/Lung:GTEx/v8/Muscle_Skeletal:GTEx/v8/Nerve_Tibial:GTEx/v8/Skin_Not_Sun_Exposed_Suprapubic:GTEx/v8/Skin_Sun_Exposed_Lower_leg:GTEx/v8/Spleen:GTEx/v8/Testis	NA	6.05e-10	rs2509805	39
ENSG00000156603	MED19	11	57471186	57479693	-1	protein_coding	219541	MED19	0.68379	-0.1517	58	8.26e-26	4.66e-20	GTEx/v8/Adipose_Subcutaneous:GTEx/v8/Adipose_Visceral_Omentum:GTEx/v8/Adrenal_Gland:GTEx/v8/Whole_Blood:GTEx/v8/Artery_Tibial:GTEx/v8/Brain_Cerebellar_Hemisphere:GTEx/v8/Brain_Cerebellum:GTEx/v8/Breast_Mammary_Tissue:GTEx/v8/Colon_Sigmoid:GTEx/v8/Colon_Transverse:GTEx/v8/Esophagus_Gastroesophageal_Junction:GTEx/v8/Esophagus_Mucosa:GTEx/v8/Esophagus_Muscularis:GTEx/v8/Heart_Atrial_Appendage:GTEx/v…	NA	6.05e-10	rs2509805	39
ENSG00000213593	TMX2	11	57480072	57508445	1	protein_coding	51075	TMX2	0.429914	0.120517	58	2.39e-09	6.8e-06	GTEx/v8/Whole_Blood:GTEx/v8/Esophagus_Mucosa:GTEx/v8/Nerve_Tibial	NA	6.05e-10	rs2509805	39
ENSG00000211450	C11orf31	11	57508825	57510986	1	protein_coding	280636	C11orf31	0.000781712	-0.641634	57	3.81e-06	0.002043	GTEx/v8/Thyroid	NA	6.05e-10	rs2509805	39
ENSG00000198561	CTNND1	11	57520715	57587018	1	protein_coding	1500	CTNND1	0.995313	-1.42886	40	4.47e-05	2.04e-08	GTEx/v8/Nerve_Tibial	NA	1.06e-09	rs2509805	39
ENSG00000242689	CNTF	11	58390146	58393198	1	protein_coding	1270	CNTF	0.000349252	-0.109965	39	1.6e-05	7.62e-28	GTEx/v8/Brain_Cortex:GTEx/v8/Muscle_Skeletal:GTEx/v8/Skin_Not_Sun_Exposed_Suprapubic	NA	6.05e-10	rs2509805	39
ENSG00000197254	AP000445.1	11	58452559	58459341	1	pseudogene	NA	NA	NA	NA	48	1.96e-06	7.06e-37	GTEx/v8/Nerve_Tibial	NA	6.05e-10	rs2509805	39
ENSG00000245532	NEAT1	11	65190245	65213011	1	lincRNA	283131	NEAT1	NA	NA	1	0.0001128	5.19e-48	GTEx/v8/Breast_Mammary_Tissue:GTEx/v8/Cells_Cultured_fibroblasts	NA	0.009401	rs801733	40
ENSG00000214659	KRT8P26	11	65494410	65495685	1	pseudogene	390211	KRT8P26	NA	NA	3	1.69e-06	3.1e-35	GTEx/v8/Artery_Aorta:GTEx/v8/Artery_Tibial:GTEx/v8/Esophagus_Mucosa:GTEx/v8/Nerve_Tibial:GTEx/v8/Thyroid	NA	1.38e-08	rs801733	40
ENSG00000255120	OVOL1-AS1	11	65556522	65558339	-1	antisense	101927828	OVOL1-AS1	NA	NA	2	3.18e-07	1.49e-23	GTEx/v8/Testis	NA	1.38e-08	rs801733	40
ENSG00000172803	SNX32	11	65601112	65624367	1	protein_coding	254122	SNX32	2.73e-13	0.151678	3	6.31e-07	2.47e-109	GTEx/v8/Adipose_Visceral_Omentum:GTEx/v8/Esophagus_Muscularis:GTEx/v8/Lung:GTEx/v8/Nerve_Tibial:GTEx/v8/Cells_Cultured_fibroblasts:GTEx/v8/Spleen	NA	1.38e-08	rs801733	40
ENSG00000172732	MUS81	11	65624597	65635124	1	protein_coding	80198	MUS81	1.58e-06	-0.100509	1	6.03e-05	0.041273	GTEx/v8/Colon_Sigmoid	NA	7.82e-08	rs801733	40
ENSG00000172638	EFEMP2	11	65633912	65641063	-1	protein_coding	30008	EFEMP2	0.0283882	NA	2	5.86e-05	0.0153151	GTEx/v8/Adrenal_Gland	NA	1.38e-08	rs801733	40
ENSG00000172543	CTSW	11	65647280	65651212	1	protein_coding	1521	CTSW	2.63e-07	0.389375	2	2.09e-06	1.15e-68	GTEx/v8/Adipose_Visceral_Omentum:GTEx/v8/Whole_Blood:GTEx/v8/Artery_Aorta:GTEx/v8/Esophagus_Gastroesophageal_Junction	NA	1.38e-08	rs801733	40
ENSG00000175376	EIF1AD	11	65764016	65769647	-1	protein_coding	84285	EIF1AD	0.181571	0.402588	2	1.38e-06	8.58e-36	GTEx/v8/Adipose_Subcutaneous:GTEx/v8/Muscle_Skeletal:GTEx/v8/Cells_Cultured_fibroblasts	NA	1.38e-08	rs801733	40
ENSG00000175334	BANF1	11	65769550	65771620	1	protein_coding	8815	BANF1	0.739287	-0.489761	1	2.12e-07	2.22e-18	GTEx/v8/Thyroid	NA	0.009401	rs801733	40
ENSG00000175315	CST6	11	65779312	65780976	1	protein_coding	1474	CST6	0.723125	-0.170314	1	0.00022117	4.17e-13	GTEx/v8/Artery_Aorta	NA	7.82e-08	rs801733	40
ENSG00000175294	CATSPER1	11	65784223	65793988	-1	protein_coding	117144	CATSPER1	1.14e-08	-0.116952	1	7.43e-06	9.69e-13	GTEx/v8/Testis	NA	0.009401	rs801733	40
ENSG00000175229	GAL3ST3	11	65809423	65816651	-1	protein_coding	89792	GAL3ST3	1.25e-06	-0.117015	1	6.26e-05	4.95e-05	GTEx/v8/Pancreas	NA	0.009401	rs801733	40
ENSG00000087365	SF3B2	11	65818200	65836779	1	protein_coding	10992	SF3B2	0.99946	-0.0687926	3	4.88e-11	1.89e-43	GTEx/v8/Whole_Blood:GTEx/v8/Artery_Aorta:GTEx/v8/Brain_Cerebellum:GTEx/v8/Colon_Sigmoid:GTEx/v8/Esophagus_Gastroesophageal_Junction:GTEx/v8/Esophagus_Muscularis:GTEx/v8/Lung:GTEx/v8/Muscle_Skeletal:GTEx/v8/Nerve_Tibial:GTEx/v8/Pancreas:GTEx/v8/Pituitary:GTEx/v8/Skin_Not_Sun_Exposed_Suprapubic:GTEx/v8/Thyroid	NA	1.38e-08	rs801733	40
ENSG00000255038	RP11-1167A19.2	11	65834748	65837090	-1	protein_coding	NA	NA	NA	NA	3	4.79e-05	0.00026541	GTEx/v8/Whole_Blood:GTEx/v8/Thyroid	NA	1.38e-08	rs801733	40
ENSG00000175115	PACS1	11	65837834	66012218	1	protein_coding	55690	PACS1	0.999906	-0.885764	3	9.72e-08	2.73e-16	GTEx/v8/Adipose_Subcutaneous:GTEx/v8/Breast_Mammary_Tissue:GTEx/v8/Nerve_Tibial:GTEx/v8/Minor_Salivary_Gland:GTEx/v8/Thyroid	NA	1.38e-08	rs801733	40
ENSG00000255320	RP11-755F10.1	11	66012311	66013710	-1	antisense	NA	NA	NA	NA	3	3.39e-06	7.29e-48	GTEx/v8/Adrenal_Gland:GTEx/v8/Colon_Transverse:GTEx/v8/Muscle_Skeletal:GTEx/v8/Nerve_Tibial	NA	1.38e-08	rs801733	40
ENSG00000174996	KLC2	11	66024765	66035331	1	protein_coding	64837	KLC2	0.997255	-0.615954	3	2.37e-09	8.05e-27	GTEx/v8/Artery_Aorta:GTEx/v8/Esophagus_Mucosa:GTEx/v8/Muscle_Skeletal:GTEx/v8/Nerve_Tibial:GTEx/v8/Cells_Cultured_fibroblasts:GTEx/v8/Skin_Not_Sun_Exposed_Suprapubic:GTEx/v8/Skin_Sun_Exposed_Lower_leg:GTEx/v8/Testis	NA	1.38e-08	rs801733	40
ENSG00000254461	RP11-755F10.3	11	66027038	66029305	-1	antisense	NA	NA	NA	NA	3	7.14e-06	1.4e-17	GTEx/v8/Artery_Aorta:GTEx/v8/Esophagus_Muscularis:GTEx/v8/Thyroid	NA	1.38e-08	rs801733	40
ENSG00000254855	RP11-867G23.1	11	66032248	66033137	-1	antisense	NA	NA	NA	NA	3	1.99e-06	9.11e-26	GTEx/v8/Artery_Aorta:GTEx/v8/Artery_Tibial:GTEx/v8/Esophagus_Gastroesophageal_Junction:GTEx/v8/Esophagus_Muscularis:GTEx/v8/Heart_Atrial_Appendage:GTEx/v8/Lung:GTEx/v8/Thyroid	NA	1.38e-08	rs801733	40
ENSG00000254762	RP11-867G23.2	11	66035106	66035600	-1	antisense	NA	NA	NA	NA	3	4.41e-06	9.51e-07	GTEx/v8/Testis	NA	1.38e-08	rs801733	40
ENSG00000174871	CNIH2	11	66045661	66052772	1	protein_coding	254263	CNIH2	0.89454	NA	1	3.85e-05	1.83e-05	GTEx/v8/Spleen	NA	0.009401	rs801733	40
ENSG00000174851	YIF1A	11	66052051	66056641	-1	protein_coding	10897	YIF1A	2.08e-09	NA	2	9.29e-05	0.00072382	GTEx/v8/Esophagus_Gastroesophageal_Junction:GTEx/v8/Cells_Cultured_fibroblasts	NA	1.38e-08	rs801733	40
ENSG00000179292	TMEM151A	11	66059341	66064135	1	protein_coding	256472	TMEM151A	0.788175	NA	1	2.13e-05	8.78e-05	GTEx/v8/Pituitary	NA	7.82e-08	rs801733	40
ENSG00000174165	ZDHHC24	11	66288108	66313709	-1	protein_coding	254359	ZDHHC24	0.00614031	-0.199989	1	0.00053697	4.68e-05	GTEx/v8/Skin_Sun_Exposed_Lower_leg	NA	7.82e-08	rs801733	40
ENSG00000136003	ISCU	12	108956358	108963160	1	protein_coding	23479	ISCU	0.135948	0.49453	1	3.7e-05	0.00540841	GTEx/v8/Stomach	NA	1.4e-05	rs6606728	42
ENSG00000076248	UNG	12	109535379	109548797	1	protein_coding	7374	UNG	0.0465812	-1.04807	246	2.76e-27	1.38e-34	GTEx/v8/Skin_Not_Sun_Exposed_Suprapubic:GTEx/v8/Skin_Sun_Exposed_Lower_leg	NA	8.57e-09	rs35393419;rs6606728	42
ENSG00000256139	RP11-968O1.5	12	109549023	109563399	1	sense_overlapping	NA	NA	NA	NA	3	5.05e-05	0.00125322	GTEx/v8/Skin_Not_Sun_Exposed_Suprapubic	NA	3.62e-08	rs35393419;rs6606728	42
ENSG00000076555	ACACB	12	109554400	109706031	1	protein_coding	32	ACACB	5.12e-22	0.136953	80	4.09e-07	1.08e-39	GTEx/v8/Cells_Cultured_fibroblasts:GTEx/v8/Skin_Not_Sun_Exposed_Suprapubic	NA	8.57e-09	rs35393419;rs6606728	42
ENSG00000139445	FOXN4	12	109715784	109747025	-1	protein_coding	121643	FOXN4	0.133061	-0.465357	247	1.32e-38	1.78e-62	GTEx/v8/Adipose_Visceral_Omentum:GTEx/v8/Muscle_Skeletal:GTEx/v8/Skin_Not_Sun_Exposed_Suprapubic:GTEx/v8/Skin_Sun_Exposed_Lower_leg	NA	8.57e-09	rs6606728;rs35393419	42
ENSG00000174527	MYO1H	12	109785708	109893328	1	protein_coding	283446	MYO1H	2.92e-17	0.269947	247	2.05e-31	8.43e-55	GTEx/v8/Esophagus_Mucosa:GTEx/v8/Heart_Left_Ventricle:GTEx/v8/Lung:GTEx/v8/Testis:GTEx/v8/Thyroid	NA	8.57e-09	rs35393419;rs6606728	42
ENSG00000256560	RP11-256L11.1	12	109791888	109797293	-1	lincRNA	101928138	LINC01486	NA	NA	76	2.62e-12	3.43e-09	GTEx/v8/Testis	NA	8.57e-09	rs35393419	42
ENSG00000255655	RP11-256L11.3	12	109883215	109885302	-1	antisense	NA	NA	NA	NA	86	2.76e-08	5.85e-25	GTEx/v8/Testis	NA	8.57e-09	rs35393419;rs6606728	42
ENSG00000110906	KCTD10	12	109886461	109915349	-1	protein_coding	83892	KCTD10	0.17267	0.585873	242	3.3e-15	7.75e-34	GTEx/v8/Adipose_Subcutaneous:GTEx/v8/Adipose_Visceral_Omentum:GTEx/v8/Whole_Blood:GTEx/v8/Artery_Aorta:GTEx/v8/Artery_Coronary:GTEx/v8/Artery_Tibial:GTEx/v8/Brain_Cerebellar_Hemisphere:GTEx/v8/Brain_Cerebellum:GTEx/v8/Colon_Sigmoid:GTEx/v8/Colon_Transverse:GTEx/v8/Esophagus_Mucosa:GTEx/v8/Heart_Left_Ventricle:GTEx/v8/Lung:GTEx/v8/Nerve_Tibial:GTEx/v8/Pituitary:GTEx/v8/Cells_Cultured_fibroblasts:G…	NA	8.57e-09	rs6606728;rs35393419	42
ENSG00000151148	UBE3B	12	109915207	109974507	1	protein_coding	89910	UBE3B	0.00938771	0.786226	215	3.72e-20	1.15e-24	GTEx/v8/Adipose_Subcutaneous:GTEx/v8/Breast_Mammary_Tissue:GTEx/v8/Colon_Transverse:GTEx/v8/Esophagus_Muscularis:GTEx/v8/Lung:GTEx/v8/Muscle_Skeletal:GTEx/v8/Nerve_Tibial:GTEx/v8/Cells_Cultured_fibroblasts:GTEx/v8/Skin_Not_Sun_Exposed_Suprapubic:GTEx/v8/Skin_Sun_Exposed_Lower_leg:GTEx/v8/Thyroid	NA	8.57e-09	rs6606728;rs35393419	42
ENSG00000139428	MMAB	12	109991542	110011679	-1	protein_coding	326625	MMAB	0.00387716	2.91819	247	9.01e-21	4.94e-16	GTEx/v8/Adipose_Subcutaneous:GTEx/v8/Adipose_Visceral_Omentum:GTEx/v8/Adrenal_Gland:GTEx/v8/Whole_Blood:GTEx/v8/Artery_Tibial:GTEx/v8/Brain_Caudate_basal_ganglia:GTEx/v8/Brain_Frontal_Cortex_BA9:GTEx/v8/Breast_Mammary_Tissue:GTEx/v8/Colon_Sigmoid:GTEx/v8/Colon_Transverse:GTEx/v8/Esophagus_Mucosa:GTEx/v8/Heart_Left_Ventricle:GTEx/v8/Lung:GTEx/v8/Muscle_Skeletal:GTEx/v8/Nerve_Tibial:GTEx/v8/Pancrea…	NA	8.57e-09	rs35393419;rs6606728	42
ENSG00000110921	MVK	12	110011060	110035067	1	protein_coding	4598	MVK	0.0421614	-0.508882	199	7.5e-08	3.47e-20	GTEx/v8/Adrenal_Gland:GTEx/v8/Whole_Blood:GTEx/v8/Brain_Cortex:GTEx/v8/Heart_Left_Ventricle:GTEx/v8/Spleen	NA	1.33e-08	rs6606728;rs35393419	42
ENSG00000122970	IFT81	12	110562140	110656602	1	protein_coding	28981	IFT81	5.76e-07	-0.471138	1	6.99e-05	3.17e-07	GTEx/v8/Cells_Cultured_fibroblasts	NA	0.0001559	rs6606728	42
ENSG00000120697	ALG5	13	37523912	37574398	-1	protein_coding	29880	ALG5	0.00342998	NA	11	8.54e-11	1.38e-08	GTEx/v8/Adipose_Subcutaneous:GTEx/v8/Adipose_Visceral_Omentum:GTEx/v8/Artery_Tibial:GTEx/v8/Brain_Caudate_basal_ganglia:GTEx/v8/Brain_Cortex:GTEx/v8/Breast_Mammary_Tissue:GTEx/v8/Colon_Transverse:GTEx/v8/Esophagus_Mucosa:GTEx/v8/Lung:GTEx/v8/Muscle_Skeletal:GTEx/v8/Nerve_Tibial:GTEx/v8/Cells_Cultured_fibroblasts:GTEx/v8/Thyroid	NA	9.77e-09	rs9576155	43
ENSG00000102710	SUPT20H	13	37583449	37633850	-1	protein_coding	55578	SUPT20H	0.00138199	-0.417264	11	6.96e-14	9.4e-10	GTEx/v8/Testis	NA	9.77e-09	rs9576155	43
ENSG00000180138	CSNK1A1L	13	37677398	37679803	-1	protein_coding	122011	CSNK1A1L	0.000361794	0.918204	11	1.47e-31	3.13e-91	GTEx/v8/Spleen:GTEx/v8/Testis	NA	9.77e-09	rs9576155	43
ENSG00000136098	NEK3	13	52706775	52733996	-1	protein_coding	4752	NEK3	5.06e-10	-0.172946	2	8.93e-05	2.07e-14	GTEx/v8/Lung	NA	2.34e-15	rs12552;rs2806985	44
ENSG00000198384	TPTE2P3	13	53063128	53161222	1	pseudogene	220115	TPTE2P3	NA	NA	4	0.0001664	0.00047637	GTEx/v8/Nerve_Tibial	NA	1.27e-15	rs12552;rs2806985	44
ENSG00000250299	MRPS31P4	13	53191693	53211581	1	pseudogene	100885866	MRPS31P4	NA	NA	38	8.21e-06	0.00011371	GTEx/v8/Brain_Cortex	NA	2.76e-11	rs1951722;rs2806985;rs9536383	44
ENSG00000136110	LECT1	13	53277399	53313947	-1	protein_coding	11061	LECT1	6.68e-06	0.0923413	41	1.66e-05	0.0144139	GTEx/v8/Esophagus_Muscularis:GTEx/v8/Spleen	NA	2.76e-13	rs12552;rs2806985;rs1951722;rs9536383;rs9536347;rs6561724	44
ENSG00000136099	PCDH8	13	53418109	53422775	-1	protein_coding	5100	PCDH8	NA	-0.692641	140	3.01e-09	1.95e-15	GTEx/v8/Nerve_Tibial:GTEx/v8/Minor_Salivary_Gland	NA	5.69e-16	rs12552;rs2806985;rs1951722;rs4525388;rs9536383;rs7332332;rs2491124;rs6561724	44
ENSG00000102837	OLFM4	13	53602894	53626192	1	protein_coding	10562	OLFM4	2.41e-06	0.814566	111	9.75e-11	7.32e-24	GTEx/v8/Artery_Aorta	NA	5.69e-16	rs12552;rs2806985;rs1951722;rs4525388;rs9536383;rs2491124	44
ENSG00000225510	PCDH8P1	13	53774116	53776547	1	pseudogene	100133285	PCDH8P1	NA	NA	92	1.05e-06	0.00408458	GTEx/v8/Brain_Anterior_cingulate_cortex_BA24:GTEx/v8/Brain_Nucleus_accumbens_basal_ganglia	NA	2.76e-13	rs1951722;rs2806985;rs4525388;rs2491124;rs7332332;rs6561724;rs9536383	44
ENSG00000136149	RPL13AP25	13	55014839	55015450	-1	pseudogene	100287887	RPL13AP25	NA	NA	7	0.00015456	0.0245166	GTEx/v8/Cells_Cultured_fibroblasts	NA	4.64e-09	rs6561724;rs7332332	44
ENSG00000258636	CTD-2298J14.2	14	42057064	42074059	-1	lincRNA	NA	NA	NA	NA	82	7.97e-56	3.32e-48	GTEx/v8/Adipose_Visceral_Omentum:GTEx/v8/Artery_Aorta:GTEx/v8/Artery_Coronary:GTEx/v8/Breast_Mammary_Tissue:GTEx/v8/Colon_Sigmoid:GTEx/v8/Colon_Transverse:GTEx/v8/Nerve_Tibial:GTEx/v8/Ovary:GTEx/v8/Cells_Cultured_fibroblasts:GTEx/v8/Spleen:GTEx/v8/Thyroid	NA	3.3e-10	rs8013655	45
ENSG00000165379	LRFN5	14	42076773	42373752	1	protein_coding	145581	LRFN5	0.712325	0.122069	82	1.96e-32	9.65e-27	GTEx/v8/Adipose_Subcutaneous:GTEx/v8/Artery_Aorta:GTEx/v8/Artery_Tibial:GTEx/v8/Brain_Cerebellar_Hemisphere:GTEx/v8/Brain_Cerebellum:GTEx/v8/Esophagus_Muscularis:GTEx/v8/Cells_Cultured_fibroblasts:GTEx/v8/Skin_Not_Sun_Exposed_Suprapubic:GTEx/v8/Skin_Sun_Exposed_Lower_leg:GTEx/v8/Spleen:GTEx/v8/Testis:GTEx/v8/Thyroid	NA	3.3e-10	rs8013655	45
ENSG00000270304	RP11-597G23.1	15	37546080	37547153	1	pseudogene	NA	NA	NA	NA	26	2.6e-12	1.95e-08	GTEx/v8/Brain_Nucleus_accumbens_basal_ganglia:GTEx/v8/Testis	NA	1.5e-09	rs1520946;rs614443	46
ENSG00000259434	RP11-720L8.1	15	37657228	37783009	-1	lincRNA	NA	NA	NA	NA	62	2.78e-18	3.68e-19	GTEx/v8/Testis	NA	1.5e-09	rs1520946;rs614443	46
ENSG00000260624	RP11-24D15.1	15	74163291	74165707	-1	antisense	NA	NA	NA	NA	14	1.25e-07	1.15e-50	GTEx/v8/Testis	NA	4.19e-09	rs62004865	47
ENSG00000167139	TBC1D21	15	74165949	74181555	1	protein_coding	161514	TBC1D21	0.0223268	-0.0461509	18	2.89e-05	9.44e-16	GTEx/v8/Testis	NA	2.21e-06	rs62004865	47
ENSG00000261801	LOXL1-AS1	15	74200424	74220589	-1	antisense	100287616	LOXL1-AS1	NA	NA	32	2e-08	5.64e-31	GTEx/v8/Esophagus_Mucosa:GTEx/v8/Esophagus_Muscularis:GTEx/v8/Cells_Cultured_fibroblasts:GTEx/v8/Skin_Not_Sun_Exposed_Suprapubic:GTEx/v8/Testis	NA	4.19e-09	rs62004865	47
ENSG00000067221	STOML1	15	74275547	74286963	-1	protein_coding	9399	STOML1	5.53e-05	0.857568	33	6.16e-07	6.51e-32	GTEx/v8/Adipose_Subcutaneous:GTEx/v8/Whole_Blood:GTEx/v8/Artery_Tibial:GTEx/v8/Nerve_Tibial:GTEx/v8/Thyroid	NA	4.19e-09	rs35917667;rs62004865	47
ENSG00000140464	PML	15	74287014	74340153	1	protein_coding	5371	PML	0.937511	-0.437708	26	3.04e-05	2.6e-14	GTEx/v8/Whole_Blood:GTEx/v8/Skin_Not_Sun_Exposed_Suprapubic	NA	1.54e-08	rs62004865;rs35917667	47
ENSG00000167178	ISLR2	15	74392652	74430881	1	protein_coding	57611	ISLR2	NA	-2.49335	43	1.02e-24	1.24e-20	GTEx/v8/Adipose_Subcutaneous:GTEx/v8/Adipose_Visceral_Omentum:GTEx/v8/Artery_Aorta:GTEx/v8/Artery_Coronary:GTEx/v8/Artery_Tibial:GTEx/v8/Breast_Mammary_Tissue:GTEx/v8/Colon_Transverse:GTEx/v8/Esophagus_Gastroesophageal_Junction:GTEx/v8/Esophagus_Mucosa:GTEx/v8/Esophagus_Muscularis:GTEx/v8/Heart_Left_Ventricle:GTEx/v8/Lung:GTEx/v8/Nerve_Tibial:GTEx/v8/Pancreas:GTEx/v8/Prostate:GTEx/v8/Skin_Not_Sun…	NA	4.19e-09	rs35917667;rs62004865	47
ENSG00000248540	RP11-247C2.2	15	74418256	74421619	-1	protein_coding	283731	LOC283731	NA	NA	33	2.65e-20	1.11e-15	GTEx/v8/Adipose_Subcutaneous:GTEx/v8/Adipose_Visceral_Omentum:GTEx/v8/Breast_Mammary_Tissue:GTEx/v8/Colon_Transverse:GTEx/v8/Esophagus_Gastroesophageal_Junction:GTEx/v8/Esophagus_Muscularis:GTEx/v8/Heart_Left_Ventricle:GTEx/v8/Lung:GTEx/v8/Muscle_Skeletal:GTEx/v8/Prostate:GTEx/v8/Skin_Not_Sun_Exposed_Suprapubic:GTEx/v8/Skin_Sun_Exposed_Lower_leg:GTEx/v8/Thyroid	NA	3.39e-08	rs35917667;rs62004865	47
ENSG00000261543	RP11-665J16.1	15	74445141	74471567	-1	antisense	NA	NA	NA	NA	33	3.83e-15	1.27e-10	GTEx/v8/Brain_Anterior_cingulate_cortex_BA24:GTEx/v8/Brain_Cortex:GTEx/v8/Brain_Frontal_Cortex_BA9	NA	2.87e-08	rs35917667;rs62004865	47
ENSG00000129009	ISLR	15	74466012	74469213	1	protein_coding	3671	ISLR	0.000436482	0.403602	20	1.59e-05	0.00094666	GTEx/v8/Heart_Left_Ventricle:GTEx/v8/Nerve_Tibial:GTEx/v8/Cells_Cultured_fibroblasts:GTEx/v8/Thyroid	NA	8.14e-07	rs35917667	47
ENSG00000137868	STRA6	15	74471807	74504608	-1	protein_coding	64220	STRA6	3.25e-08	-0.108782	28	1.72e-05	0.0129563	GTEx/v8/Nerve_Tibial:GTEx/v8/Thyroid	NA	3.39e-08	rs35917667	47
ENSG00000261384	RP11-60L3.2	15	74595346	74596684	1	sense_intronic	NA	NA	NA	NA	3	2.88e-05	1.23e-18	GTEx/v8/Testis	NA	6.23e-07	rs35917667	47
ENSG00000138629	UBL7	15	74738318	74753523	-1	protein_coding	84993	UBL7	0.0277554	-0.358914	3	9.65e-06	4.05e-09	GTEx/v8/Lung:GTEx/v8/Muscle_Skeletal	NA	4.19e-09	rs62004865	47
ENSG00000140465	CYP1A1	15	75011883	75017951	-1	protein_coding	1543	CYP1A1	1.97e-07	-0.498944	1	0.00026787	2.72e-06	GTEx/v8/Nerve_Tibial	NA	1.19e-07	rs62004865	47
ENSG00000140474	ULK3	15	75128457	75135687	-1	protein_coding	25989	ULK3	0.0169272	-0.673053	2	5.52e-06	2.34e-29	GTEx/v8/Cells_Cultured_fibroblasts	NA	6.23e-07	rs35917667	47
ENSG00000178718	RPP25	15	75246757	75249805	-1	protein_coding	54913	RPP25	0.00695758	-2.0165	9	1.5e-05	2.39e-112	GTEx/v8/Adipose_Subcutaneous:GTEx/v8/Artery_Tibial:GTEx/v8/Nerve_Tibial	NA	6.23e-07	rs35917667	47
ENSG00000138621	PPCDC	15	75315896	75409803	1	protein_coding	60490	PPCDC	0.000879601	-0.573317	1	0.00011971	3.48e-08	GTEx/v8/Esophagus_Gastroesophageal_Junction	NA	2.19e-06	rs35917667	47
ENSG00000265566	RN7SL605P	17	2657126	2657430	1	misc_RNA	106481087	RN7SL605P	NA	NA	1	0.00010586	5.83e-09	GTEx/v8/Brain_Frontal_Cortex_BA9	NA	NA	rs2509805	39
ENSG00000013306	SLC25A39	17	42396993	42402238	-1	protein_coding	51629	SLC25A39	0.000102385	NA	6	5.83e-05	8.07e-14	GTEx/v8/Esophagus_Gastroesophageal_Junction	NA	8.88e-09	rs60289499;rs4986172	50
ENSG00000180336	C17orf104	17	42733762	42767676	1	protein_coding	284071	C17orf104	0.978536	0.492103	11	9.02e-05	2.72e-06	GTEx/v8/Skin_Sun_Exposed_Lower_leg	NA	8.88e-09	rs60289499	50
ENSG00000172992	DCAKD	17	43100708	43138473	-1	protein_coding	79877	DCAKD	0.0293861	0.848595	21	2.43e-23	4.3e-69	GTEx/v8/Adipose_Subcutaneous:GTEx/v8/Adipose_Visceral_Omentum:GTEx/v8/Whole_Blood:GTEx/v8/Artery_Aorta:GTEx/v8/Artery_Tibial:GTEx/v8/Brain_Cerebellar_Hemisphere:GTEx/v8/Brain_Cerebellum:GTEx/v8/Brain_Cortex:GTEx/v8/Brain_Frontal_Cortex_BA9:GTEx/v8/Breast_Mammary_Tissue:GTEx/v8/Colon_Sigmoid:GTEx/v8/Colon_Transverse:GTEx/v8/Esophagus_Gastroesophageal_Junction:GTEx/v8/Esophagus_Mucosa:GTEx/v8/Esoph…	NA	4.67e-10	rs60289499;rs4986172	50
ENSG00000136448	NMT1	17	43128978	43186384	1	protein_coding	4836	NMT1	0.998501	0.0324477	21	7.94e-15	5.31e-37	GTEx/v8/Adipose_Subcutaneous:GTEx/v8/Adipose_Visceral_Omentum:GTEx/v8/Artery_Aorta:GTEx/v8/Artery_Coronary:GTEx/v8/Artery_Tibial:GTEx/v8/Brain_Cerebellum:GTEx/v8/Brain_Hypothalamus:GTEx/v8/Brain_Nucleus_accumbens_basal_ganglia:GTEx/v8/Breast_Mammary_Tissue:GTEx/v8/Colon_Sigmoid:GTEx/v8/Colon_Transverse:GTEx/v8/Esophagus_Gastroesophageal_Junction:GTEx/v8/Esophagus_Mucosa:GTEx/v8/Esophagus_Muscular…	NA	4.67e-10	rs60289499;rs4986172	50
ENSG00000161714	PLCD3	17	43186335	43210721	-1	protein_coding	113026	PLCD3	0.000143297	NA	5	1.53e-07	1.1e-26	GTEx/v8/Esophagus_Muscularis:GTEx/v8/Muscle_Skeletal	NA	8.35e-10	rs4986172	50
ENSG00000181513	ACBD4	17	43209967	43221548	1	protein_coding	79777	ACBD4	1.83e-05	-0.326407	20	1.38e-12	3.14e-41	GTEx/v8/Adipose_Visceral_Omentum:GTEx/v8/Artery_Tibial:GTEx/v8/Brain_Cerebellar_Hemisphere:GTEx/v8/Brain_Cerebellum:GTEx/v8/Brain_Hippocampus:GTEx/v8/Esophagus_Muscularis:GTEx/v8/Lung:GTEx/v8/Nerve_Tibial:GTEx/v8/Ovary:GTEx/v8/Skin_Not_Sun_Exposed_Suprapubic:GTEx/v8/Skin_Sun_Exposed_Lower_leg:GTEx/v8/Thyroid	NA	4.67e-10	rs60289499;rs4986172	50
ENSG00000186834	HEXIM1	17	43224684	43229468	1	protein_coding	10614	HEXIM1	0.9444	-1.49531	21	5.74e-13	8.72e-14	GTEx/v8/Adipose_Subcutaneous:GTEx/v8/Adipose_Visceral_Omentum:GTEx/v8/Artery_Aorta:GTEx/v8/Artery_Tibial:GTEx/v8/Brain_Cortex:GTEx/v8/Brain_Frontal_Cortex_BA9:GTEx/v8/Brain_Putamen_basal_ganglia:GTEx/v8/Esophagus_Mucosa:GTEx/v8/Muscle_Skeletal:GTEx/v8/Nerve_Tibial:GTEx/v8/Cells_Cultured_fibroblasts:GTEx/v8/Thyroid	NA	4.67e-10	rs60289499;rs4986172	50
ENSG00000267288	RP13-890H12.2	17	43246172	43248951	-1	antisense	105371795	LOC105371795	NA	NA	19	1.27e-10	9.51e-08	GTEx/v8/Adipose_Subcutaneous:GTEx/v8/Whole_Blood:GTEx/v8/Brain_Cerebellar_Hemisphere:GTEx/v8/Brain_Cerebellum:GTEx/v8/Brain_Cortex:GTEx/v8/Muscle_Skeletal:GTEx/v8/Cells_Cultured_fibroblasts	NA	4.67e-10	rs60289499;rs4986172	50
ENSG00000184361	SPATA32	17	43331760	43339479	-1	protein_coding	124783	SPATA32	2.95e-05	-0.414756	3	0.00012133	0.044056	GTEx/v8/Brain_Cerebellum	NA	3.31e-09	rs60289499;rs4986172	50
ENSG00000159314	ARHGAP27	17	43471275	43511787	-1	protein_coding	201176	ARHGAP27	0.00125584	-0.761628	2	0.00021181	1.18e-11	GTEx/v8/Testis	NA	2.81e-08	rs60289499	50
ENSG00000267344	CTB-39G8.3	17	43474298	43474843	1	antisense	NA	NA	NA	NA	11	6.36e-05	0.00039552	GTEx/v8/Muscle_Skeletal:GTEx/v8/Testis	NA	4.67e-10	rs60289499	50
ENSG00000236234	AC091132.1	17	43530210	43541431	1	antisense	NA	NA	NA	NA	16	2.79e-05	1.16e-09	GTEx/v8/Testis	NA	4.67e-10	rs60289499;rs4986172	50
ENSG00000214425	LRRC37A4P	17	43578685	43627701	-1	pseudogene	55073	LRRC37A4P	NA	NA	19	1.22e-07	4.97e-169	GTEx/v8/Adipose_Subcutaneous:GTEx/v8/Whole_Blood:GTEx/v8/Artery_Tibial:GTEx/v8/Colon_Transverse:GTEx/v8/Esophagus_Gastroesophageal_Junction:GTEx/v8/Esophagus_Muscularis:GTEx/v8/Heart_Atrial_Appendage:GTEx/v8/Lung:GTEx/v8/Nerve_Tibial:GTEx/v8/Pancreas:GTEx/v8/Cells_Cultured_fibroblasts:GTEx/v8/Skin_Not_Sun_Exposed_Suprapubic:GTEx/v8/Thyroid	NA	4.67e-10	rs60289499;rs4986172	50
ENSG00000264070	DND1P1	17	43663237	43664295	1	pseudogene	644157	DND1P1	NA	NA	3	7.52e-05	7.04e-129	GTEx/v8/Muscle_Skeletal	NA	4.67e-10	rs60289499;rs4986172	50
ENSG00000263503	RP11-707O23.5	17	43678235	43679706	-1	pseudogene	NA	NA	NA	NA	11	3.88e-06	1.5e-110	GTEx/v8/Adipose_Subcutaneous:GTEx/v8/Artery_Tibial:GTEx/v8/Esophagus_Gastroesophageal_Junction:GTEx/v8/Heart_Atrial_Appendage	NA	4.67e-10	rs60289499;rs4986172	50
ENSG00000204650	CRHR1-IT1	17	43697694	43725582	1	pseudogene	147081	CRHR1-IT1	NA	NA	11	3.82e-07	6.36e-181	GTEx/v8/Adipose_Subcutaneous:GTEx/v8/Artery_Tibial:GTEx/v8/Esophagus_Gastroesophageal_Junction:GTEx/v8/Esophagus_Muscularis:GTEx/v8/Nerve_Tibial:GTEx/v8/Cells_Cultured_fibroblasts:GTEx/v8/Skin_Not_Sun_Exposed_Suprapubic	NA	4.67e-10	rs60289499;rs4986172	50
ENSG00000186868	MAPT	17	43971748	44105700	1	protein_coding	4137	MAPT	4.68e-05	2.01024	3	0.00011244	2.23e-103	GTEx/v8/Testis	NA	4.67e-10	rs60289499;rs4986172	50
ENSG00000196628	TCF4	18	52889562	53332018	-1	protein_coding	6925	TCF4	0.999867	0.443466	8	6.6e-05	0.0393026	GTEx/v8/Esophagus_Mucosa:GTEx/v8/Skin_Sun_Exposed_Lower_leg	NA	2.03e-11	rs4801150	51
ENSG00000267325	RP11-397A16.2	18	53443958	53448952	-1	lincRNA	NA	NA	NA	NA	4	7.01e-05	4.67e-05	GTEx/v8/Artery_Aorta:GTEx/v8/Artery_Tibial:GTEx/v8/Esophagus_Mucosa	NA	2.72e-08	rs2924328;rs12958048	51
ENSG00000075702	WDR62	19	36545783	36596008	1	protein_coding	284403	WDR62	3.7e-13	-0.522823	1	7.37e-05	3.18e-49	GTEx/v8/Skin_Sun_Exposed_Lower_leg	NA	NA	rs528504	52
ENSG00000161281	COX7A1	19	36641824	36643771	-1	protein_coding	1346	COX7A1	0.00356252	-0.184036	1	0.0001243	3.59e-24	GTEx/v8/Adipose_Subcutaneous	NA	NA	rs528504	52
ENSG00000267053	CTD-3162L10.1	19	36795482	36803570	1	lincRNA	NA	NA	NA	NA	2	7.09e-05	0.0205074	GTEx/v8/Thyroid	NA	4.21e-05	rs528504	52
ENSG00000232677	LINC00665	19	36803969	36822620	-1	lincRNA	100506930	LINC00665	NA	NA	181	2.81e-14	1.42e-24	GTEx/v8/Brain_Anterior_cingulate_cortex_BA24:GTEx/v8/Brain_Caudate_basal_ganglia:GTEx/v8/Brain_Cortex:GTEx/v8/Brain_Frontal_Cortex_BA9:GTEx/v8/Brain_Hippocampus:GTEx/v8/Brain_Hypothalamus:GTEx/v8/Brain_Nucleus_accumbens_basal_ganglia:GTEx/v8/Brain_Putamen_basal_ganglia:GTEx/v8/Brain_Substantia_nigra:GTEx/v8/Esophagus_Gastroesophageal_Junction:GTEx/v8/Esophagus_Muscularis:GTEx/v8/Heart_Atrial_Appe…	NA	7.9e-09	rs528504	52
ENSG00000186017	ZNF566	19	36936021	36980804	-1	protein_coding	84924	ZNF566	0.637364	-0.59994	181	2.32e-09	1.74e-16	GTEx/v8/Adipose_Subcutaneous:GTEx/v8/Artery_Tibial:GTEx/v8/Brain_Cerebellar_Hemisphere:GTEx/v8/Breast_Mammary_Tissue:GTEx/v8/Esophagus_Mucosa:GTEx/v8/Lung:GTEx/v8/Nerve_Tibial:GTEx/v8/Cells_Cultured_fibroblasts:GTEx/v8/Skin_Not_Sun_Exposed_Suprapubic:GTEx/v8/Skin_Sun_Exposed_Lower_leg	NA	7.9e-09	rs528504	52
ENSG00000267309	CTD-2630F21.1	19	36980551	36981942	1	antisense	728752	LOC728752	NA	NA	175	5.08e-07	1.65e-07	GTEx/v8/Adipose_Visceral_Omentum:GTEx/v8/Colon_Transverse:GTEx/v8/Esophagus_Gastroesophageal_Junction:GTEx/v8/Esophagus_Muscularis:GTEx/v8/Prostate:GTEx/v8/Skin_Not_Sun_Exposed_Suprapubic	NA	7.9e-09	rs528504	52
ENSG00000254004	ZNF260	19	37001597	37019562	-1	protein_coding	339324	ZNF260	3.07e-06	-0.371471	182	7.01e-27	2.23e-39	GTEx/v8/Artery_Tibial:GTEx/v8/Brain_Caudate_basal_ganglia:GTEx/v8/Brain_Cerebellar_Hemisphere:GTEx/v8/Brain_Nucleus_accumbens_basal_ganglia:GTEx/v8/Breast_Mammary_Tissue:GTEx/v8/Esophagus_Gastroesophageal_Junction:GTEx/v8/Esophagus_Mucosa:GTEx/v8/Esophagus_Muscularis:GTEx/v8/Heart_Atrial_Appendage:GTEx/v8/Heart_Left_Ventricle:GTEx/v8/Muscle_Skeletal:GTEx/v8/Nerve_Tibial:GTEx/v8/Prostate:GTEx/v8/C…	NA	7.9e-09	rs528504	52
ENSG00000186020	ZNF529	19	37025676	37096178	-1	protein_coding	57711	ZNF529	0.00106714	0.632376	63	4.65e-06	3.63e-17	GTEx/v8/Adipose_Subcutaneous:GTEx/v8/Adipose_Visceral_Omentum:GTEx/v8/Breast_Mammary_Tissue:GTEx/v8/Esophagus_Muscularis:GTEx/v8/Stomach:GTEx/v8/Thyroid	NA	5.23e-06	rs528504	52
ENSG00000233527	AC092295.7	19	37063972	37085610	1	antisense	101927599	ZNF529-AS1	NA	NA	177	2.36e-08	1.07e-35	GTEx/v8/Whole_Blood:GTEx/v8/Esophagus_Muscularis:GTEx/v8/Cells_Cultured_fibroblasts:GTEx/v8/Spleen:GTEx/v8/Testis	NA	7.9e-09	rs528504	52
ENSG00000225975	AC074138.3	19	37176342	37178351	-1	lincRNA	101927621	LINC01534	NA	NA	1	0.00012565	0.0218912	GTEx/v8/Spleen	NA	4.87e-05	rs528504	52
ENSG00000189042	ZNF567	19	37178514	37218603	1	protein_coding	163081	ZNF567	1.87e-06	0.177191	110	2.91e-10	8.15e-16	GTEx/v8/Testis	NA	1.28e-05	rs528504	52
ENSG00000267041	ZNF850	19	37205285	37263727	-1	protein_coding	342892	ZNF850	0.188901	0.619445	6	5.73e-05	0.00017816	GTEx/v8/Breast_Mammary_Tissue:GTEx/v8/Skin_Sun_Exposed_Lower_leg	NA	0.000111	rs528504	52
ENSG00000267260	CTD-2162K18.4	19	37264055	37267980	1	protein_coding	NA	NA	NA	NA	182	2.21e-13	4.86e-69	GTEx/v8/Artery_Aorta:GTEx/v8/Artery_Tibial:GTEx/v8/Brain_Amygdala:GTEx/v8/Brain_Cerebellar_Hemisphere:GTEx/v8/Brain_Cerebellum:GTEx/v8/Brain_Cortex:GTEx/v8/Brain_Hippocampus:GTEx/v8/Brain_Hypothalamus:GTEx/v8/Brain_Putamen_basal_ganglia:GTEx/v8/Brain_Spinal_cord_cervical_c-1:GTEx/v8/Brain_Substantia_nigra:GTEx/v8/Esophagus_Muscularis:GTEx/v8/Heart_Atrial_Appendage:GTEx/v8/Skin_Sun_Exposed_Lower_l…	NA	7.9e-09	rs528504	52
ENSG00000267353	CTD-2162K18.3	19	37264614	37266810	-1	lincRNA	NA	NA	NA	NA	182	4.71e-08	0.00011145	GTEx/v8/Brain_Cerebellum	NA	7.9e-09	rs528504	52
ENSG00000267254	CTD-2162K18.5	19	37288420	37319017	1	antisense	284408	ZNF790-AS1	NA	NA	163	2.78e-06	0.00022303	GTEx/v8/Adipose_Subcutaneous:GTEx/v8/Brain_Cerebellum:GTEx/v8/Brain_Cortex:GTEx/v8/Lung	NA	7.9e-09	rs528504	52
ENSG00000197863	ZNF790	19	37308330	37341689	-1	protein_coding	388536	ZNF790	3.28e-12	-0.593222	1	0.00018623	0.0398186	GTEx/v8/Brain_Cerebellum	NA	0.001272	rs528504	52
ENSG00000251247	ZNF345	19	37341263	37403931	1	protein_coding	25850	ZNF345	2.33e-11	-0.704688	6	3.08e-06	0.00459914	GTEx/v8/Brain_Cerebellar_Hemisphere	NA	0.0003927	rs528504	52
ENSG00000198453	ZNF568	19	37407231	37489602	1	protein_coding	374900	ZNF568	4.91e-09	-0.408377	182	1.68e-09	3.19e-12	GTEx/v8/Artery_Aorta:GTEx/v8/Artery_Tibial:GTEx/v8/Muscle_Skeletal:GTEx/v8/Skin_Sun_Exposed_Lower_leg	NA	7.9e-09	rs528504	52
ENSG00000197050	ZNF420	19	37498759	37621216	1	protein_coding	147923	ZNF420	3.29e-08	1.11207	51	0.00023304	0.0188957	GTEx/v8/Nerve_Tibial:GTEx/v8/Skin_Sun_Exposed_Lower_leg:GTEx/v8/Testis	NA	3.78e-05	rs528504	52
ENSG00000196967	ZNF585A	19	37597636	37663643	-1	protein_coding	199704	ZNF585A	0.711327	0.518767	182	1.27e-13	8.97e-19	GTEx/v8/Adipose_Subcutaneous:GTEx/v8/Artery_Tibial:GTEx/v8/Colon_Transverse:GTEx/v8/Esophagus_Gastroesophageal_Junction:GTEx/v8/Esophagus_Muscularis:GTEx/v8/Nerve_Tibial:GTEx/v8/Skin_Sun_Exposed_Lower_leg:GTEx/v8/Spleen	NA	7.9e-09	rs528504	52
ENSG00000245680	ZNF585B	19	37672481	37709055	-1	protein_coding	92285	ZNF585B	0.00569167	-0.572054	182	8.04e-30	3.04e-44	GTEx/v8/Adipose_Subcutaneous:GTEx/v8/Adipose_Visceral_Omentum:GTEx/v8/Artery_Aorta:GTEx/v8/Artery_Coronary:GTEx/v8/Artery_Tibial:GTEx/v8/Brain_Cerebellar_Hemisphere:GTEx/v8/Brain_Cerebellum:GTEx/v8/Breast_Mammary_Tissue:GTEx/v8/Colon_Sigmoid:GTEx/v8/Colon_Transverse:GTEx/v8/Esophagus_Gastroesophageal_Junction:GTEx/v8/Esophagus_Mucosa:GTEx/v8/Esophagus_Muscularis:GTEx/v8/Muscle_Skeletal:GTEx/v8/Ne…	NA	7.9e-09	rs528504	52
ENSG00000226686	AC012309.5	19	37742814	37756437	1	lincRNA	101927667	LINC01535	NA	NA	182	1.73e-142	5.12e-135	GTEx/v8/Adipose_Subcutaneous:GTEx/v8/Adipose_Visceral_Omentum:GTEx/v8/Adrenal_Gland:GTEx/v8/Cells_EBV-transformed_lymphocytes:GTEx/v8/Artery_Aorta:GTEx/v8/Artery_Coronary:GTEx/v8/Artery_Tibial:GTEx/v8/Brain_Amygdala:GTEx/v8/Brain_Anterior_cingulate_cortex_BA24:GTEx/v8/Brain_Caudate_basal_ganglia:GTEx/v8/Brain_Cerebellar_Hemisphere:GTEx/v8/Brain_Cerebellum:GTEx/v8/Brain_Cortex:GTEx/v8/Brain_Fronta…	NA	7.9e-09	rs528504	52
ENSG00000267605	CTD-3220F14.1	19	37756841	37762420	-1	lincRNA	NA	NA	NA	NA	182	2.37e-10	7.08e-09	GTEx/v8/Artery_Aorta:GTEx/v8/Artery_Tibial:GTEx/v8/Brain_Cerebellum:GTEx/v8/Esophagus_Gastroesophageal_Junction:GTEx/v8/Heart_Atrial_Appendage:GTEx/v8/Heart_Left_Ventricle:GTEx/v8/Muscle_Skeletal:GTEx/v8/Nerve_Tibial:GTEx/v8/Cells_Cultured_fibroblasts:GTEx/v8/Skin_Not_Sun_Exposed_Suprapubic:GTEx/v8/Skin_Sun_Exposed_Lower_leg:GTEx/v8/Testis	NA	7.9e-09	rs528504	52
ENSG00000181666	HKR1	19	37803739	37860267	1	protein_coding	284459	HKR1	2.72e-10	-0.700981	182	2.11e-30	1.72e-26	GTEx/v8/Adipose_Subcutaneous:GTEx/v8/Adrenal_Gland:GTEx/v8/Whole_Blood:GTEx/v8/Artery_Tibial:GTEx/v8/Colon_Transverse:GTEx/v8/Esophagus_Mucosa:GTEx/v8/Lung:GTEx/v8/Cells_Cultured_fibroblasts:GTEx/v8/Skin_Not_Sun_Exposed_Suprapubic:GTEx/v8/Skin_Sun_Exposed_Lower_leg:GTEx/v8/Spleen:GTEx/v8/Testis:GTEx/v8/Thyroid	NA	7.9e-09	rs528504	52
ENSG00000267682	CTD-3220F14.2	19	37828138	37828645	1	sense_intronic	NA	NA	NA	NA	3	6.62e-05	0.0220907	GTEx/v8/Thyroid	NA	0.0002015	rs528504	52
ENSG00000189164	ZNF527	19	37861963	37883968	1	protein_coding	84503	ZNF527	4.12e-05	-0.474531	182	1.6e-09	4.44e-08	GTEx/v8/Adrenal_Gland	NA	7.9e-09	rs528504	52
ENSG00000266916	CTD-3064H18.1	19	37988063	37997948	-1	antisense	NA	NA	NA	NA	136	4.95e-06	1.1e-11	GTEx/v8/Brain_Cerebellum:GTEx/v8/Heart_Atrial_Appendage:GTEx/v8/Heart_Left_Ventricle:GTEx/v8/Thyroid	NA	7.9e-09	rs528504	52
ENSG00000188227	ZNF793	19	37997841	38039664	1	protein_coding	390927	ZNF793	5.31e-06	2.14229	176	2.85e-10	5.18e-34	GTEx/v8/Adipose_Subcutaneous:GTEx/v8/Adipose_Visceral_Omentum:GTEx/v8/Whole_Blood:GTEx/v8/Artery_Aorta:GTEx/v8/Colon_Transverse:GTEx/v8/Esophagus_Gastroesophageal_Junction:GTEx/v8/Esophagus_Mucosa:GTEx/v8/Esophagus_Muscularis:GTEx/v8/Lung:GTEx/v8/Nerve_Tibial:GTEx/v8/Cells_Cultured_fibroblasts:GTEx/v8/Skin_Sun_Exposed_Lower_leg	NA	7.9e-09	rs528504	52
ENSG00000267470	ZNF571-AS1	19	38039816	38078249	1	antisense	100507433	ZNF571-AS1	NA	NA	176	2e-10	4.36e-24	GTEx/v8/Adipose_Visceral_Omentum:GTEx/v8/Adrenal_Gland:GTEx/v8/Artery_Aorta:GTEx/v8/Artery_Coronary:GTEx/v8/Artery_Tibial:GTEx/v8/Esophagus_Gastroesophageal_Junction:GTEx/v8/Esophagus_Mucosa:GTEx/v8/Esophagus_Muscularis:GTEx/v8/Lung:GTEx/v8/Muscle_Skeletal:GTEx/v8/Nerve_Tibial:GTEx/v8/Skin_Not_Sun_Exposed_Suprapubic:GTEx/v8/Skin_Sun_Exposed_Lower_leg:GTEx/v8/Thyroid	NA	7.9e-09	rs528504	52
ENSG00000180479	ZNF571	19	38045684	38085673	-1	protein_coding	51276	ZNF571	2.83e-09	-0.734602	182	1.77e-07	1.36e-09	GTEx/v8/Artery_Aorta:GTEx/v8/Brain_Cerebellum:GTEx/v8/Esophagus_Mucosa:GTEx/v8/Lung:GTEx/v8/Nerve_Tibial:GTEx/v8/Pituitary:GTEx/v8/Skin_Not_Sun_Exposed_Suprapubic:GTEx/v8/Skin_Sun_Exposed_Lower_leg:GTEx/v8/Thyroid	NA	7.9e-09	rs528504	52
ENSG00000120784	ZFP30	19	38104650	38183238	-1	protein_coding	22835	ZFP30	9.06e-08	0.401011	76	2.69e-06	1.3e-29	GTEx/v8/Whole_Blood:GTEx/v8/Cells_Cultured_fibroblasts	NA	5.23e-06	rs528504	52
ENSG00000196381	ZNF781	19	38158652	38183223	-1	protein_coding	163115	ZNF781	7.22e-06	-0.263307	182	3.32e-39	6.23e-52	GTEx/v8/Adipose_Subcutaneous:GTEx/v8/Adipose_Visceral_Omentum:GTEx/v8/Adrenal_Gland:GTEx/v8/Artery_Aorta:GTEx/v8/Artery_Coronary:GTEx/v8/Artery_Tibial:GTEx/v8/Brain_Anterior_cingulate_cortex_BA24:GTEx/v8/Brain_Cerebellar_Hemisphere:GTEx/v8/Brain_Cerebellum:GTEx/v8/Brain_Cortex:GTEx/v8/Brain_Frontal_Cortex_BA9:GTEx/v8/Brain_Hippocampus:GTEx/v8/Brain_Hypothalamus:GTEx/v8/Brain_Nucleus_accumbens_bas…	NA	7.9e-09	rs528504	52
ENSG00000198182	ZNF607	19	38187264	38210691	-1	protein_coding	84775	ZNF607	8.48e-08	0.349141	171	7.67e-10	5.81e-36	GTEx/v8/Artery_Aorta:GTEx/v8/Artery_Tibial:GTEx/v8/Colon_Sigmoid:GTEx/v8/Esophagus_Gastroesophageal_Junction:GTEx/v8/Cells_Cultured_fibroblasts	NA	7.9e-09	rs528504	52
ENSG00000189144	ZNF573	19	38226734	38307940	-1	protein_coding	126231	ZNF573	9.43e-09	0.174971	40	2.74e-05	5.85e-15	GTEx/v8/Cells_Cultured_fibroblasts:GTEx/v8/Testis	NA	1.34e-05	rs528504	52
ENSG00000267422	CTD-2554C21.1	19	38270326	38283505	1	pseudogene	NA	NA	NA	NA	182	2.29e-08	1.66e-09	GTEx/v8/Brain_Caudate_basal_ganglia:GTEx/v8/Brain_Frontal_Cortex_BA9:GTEx/v8/Brain_Substantia_nigra:GTEx/v8/Thyroid	NA	7.9e-09	rs528504	52
ENSG00000225868	AC016582.2	19	38314362	38345855	-1	lincRNA	100631378	LOC100631378	NA	NA	2	0.00026944	9.84e-15	GTEx/v8/Esophagus_Mucosa	NA	6.31e-05	rs528504	52
ENSG00000171804	WDR87	19	38375463	38397317	-1	protein_coding	83889	WDR87	NA	-0.135219	171	5.58e-11	2.7e-33	GTEx/v8/Skin_Sun_Exposed_Lower_leg:GTEx/v8/Thyroid	NA	7.9e-09	rs528504	52
ENSG00000105738	SIPA1L3	19	38397868	38699012	1	protein_coding	23094	SIPA1L3	0.999677	-0.516624	3	0.00019355	0.0246496	GTEx/v8/Colon_Transverse:GTEx/v8/Skin_Not_Sun_Exposed_Suprapubic	NA	0.0001032	rs528504	52
ENSG00000064655	EYA2	20	45523263	45817492	1	protein_coding	2139	EYA2	0.335504	NA	8	1.49e-08	4.86e-06	GTEx/v8/Skin_Sun_Exposed_Lower_leg	NA	3.78e-08	rs6063085	53
ENSG00000215450	RP5-890O15.3	20	45789477	45790339	-1	pseudogene	NA	NA	NA	NA	8	5.55e-07	4.48e-05	GTEx/v8/Nerve_Tibial	NA	3.78e-08	rs6063085	53
ENSG00000261706	AP001505.9	21	46414277	46415100	-1	lincRNA	NA	NA	NA	NA	1	1.11e-05	4.5e-12	GTEx/v8/Adipose_Visceral_Omentum	NA	1.51e-07	rs2838788	54
ENSG00000235374	SSR4P1	21	46491648	46494080	-1	pseudogene	728039	SSR4P1	NA	NA	13	1.08e-10	3.06e-18	GTEx/v8/Artery_Tibial:GTEx/v8/Esophagus_Muscularis:GTEx/v8/Muscle_Skeletal:GTEx/v8/Cells_Cultured_fibroblasts	NA	1.22e-09	rs2838788	54
ENSG00000197381	ADARB1	21	46493768	46646478	1	protein_coding	104	ADARB1	0.843939	0.941077	13	1.5e-11	3.98e-47	GTEx/v8/Heart_Atrial_Appendage:GTEx/v8/Heart_Left_Ventricle:GTEx/v8/Cells_Cultured_fibroblasts:GTEx/v8/Testis	NA	1.22e-09	rs2838788	54
ENSG00000182586	LINC00334	21	46654255	46678645	1	lincRNA	114042	LINC00334	NA	NA	4	1.12e-05	3.5e-16	GTEx/v8/Nerve_Tibial	NA	1.22e-09	rs2838788	54
ENSG00000215447	BX322557.10	21	46707967	46711653	1	processed_transcript	NA	NA	NA	NA	1	2.48e-05	1.88e-30	GTEx/v8/Brain_Cortex	NA	1.51e-07	rs2838788	54
ENSG00000223768	LINC00205	21	46713200	46717269	1	lincRNA	642852	LINC00205	NA	NA	4	7.59e-07	1.73e-29	GTEx/v8/Brain_Hippocampus	NA	1.22e-09	rs2838788	54
ENSG00000184274	LINC00315	21	46720160	46725172	-1	lincRNA	246704	LINC00315	NA	NA	13	4.84e-09	4.9e-64	GTEx/v8/Artery_Tibial	NA	1.22e-09	rs2838788	54
ENSG00000237664	LINC00316	21	46758505	46761905	-1	lincRNA	388830	LINC00316	NA	NA	4	9.04e-06	2.66e-25	GTEx/v8/Thyroid	NA	1.28e-09	rs2838788	54

## Sheet: Table S9
Supplementary Table S9. Results from eQTL mapping (13 brain regions)
ensg	symbol	chr	start	end	strand	type	entrezID	HUGO	pLI	ncRVIS	eqtlMapSNPs	eqtlMapminP	eqtlMapminQ	eqtlMapts	eqtlDirection	minGwasP	IndSigSNPs	GenomicLocus
ENSG00000173406	DAB1	1	57460451	59012406	-1	protein_coding	1600	DAB1	0.981409	-0.32808	31	9.88e-09	7.81e-12	GTEx/v8/Brain_Cerebellar_Hemisphere:GTEx/v8/Brain_Cerebellum	NA	3.77e-09	rs12405761	1
ENSG00000227935	RP6-102O10.1	1	57852248	57853122	1	lincRNA	NA	NA	NA	NA	39	1.87e-10	5.36e-11	GTEx/v8/Brain_Cerebellar_Hemisphere:GTEx/v8/Brain_Cerebellum	NA	3.77e-09	rs12405761	1
ENSG00000172260	NEGR1	1	71861623	72748417	-1	protein_coding	257194	NEGR1	0.951349	-1.71358	65	1.04e-08	1.84e-05	GTEx/v8/Brain_Caudate_basal_ganglia:GTEx/v8/Brain_Nucleus_accumbens_basal_ganglia:GTEx/v8/Brain_Putamen_basal_ganglia	NA	3.64e-12	rs2815752;rs2815757;rs2126077	2
ENSG00000227207	RPL31P12	1	72767155	72767512	1	pseudogene	100270887	RPL31P12	NA	NA	155	6.74e-47	1.23e-38	GTEx/v8/Brain_Cerebellar_Hemisphere:GTEx/v8/Brain_Cerebellum	NA	3.64e-12	rs2126077;rs2815757;rs2815752;rs782202;rs4649956	2
ENSG00000198700	IPO9	1	201798269	201853422	1	protein_coding	55705	IPO9	0.999992	3.33395	6	2.47e-05	0.00428953	GTEx/v8/Brain_Cerebellar_Hemisphere	NA	7.59e-09	rs2494112	5
ENSG00000198892	SHISA4	1	201857808	201861434	1	protein_coding	149345	SHISA4	0.00107148	0.256183	15	3.89e-07	1.6e-06	GTEx/v8/Brain_Cortex:GTEx/v8/Brain_Nucleus_accumbens_basal_ganglia	NA	1.28e-10	rs2494112;rs7551784;rs2279681	5
ENSG00000163431	LMOD1	1	201865580	201915715	-1	protein_coding	25802	LMOD1	0.790873	-0.0854091	32	1.11e-06	0.0005457	GTEx/v8/Brain_Frontal_Cortex_BA9:GTEx/v8/Brain_Nucleus_accumbens_basal_ganglia	NA	1.28e-10	rs11577900;rs7551784;rs2494112;rs2279681	5
ENSG00000151689	INPP1	2	191208196	191236391	1	protein_coding	3628	INPP1	0.000237352	NA	13	6.91e-08	4.55e-36	GTEx/v8/Brain_Cerebellar_Hemisphere:GTEx/v8/Brain_Cerebellum:GTEx/v8/Brain_Cortex	NA	3.36e-09	rs4577309	12
ENSG00000151690	MFSD6	2	191273081	191373931	1	protein_coding	54842	MFSD6	0.00184669	-0.109789	9	9.79e-06	4.67e-18	GTEx/v8/Brain_Cerebellar_Hemisphere:GTEx/v8/Brain_Cerebellum	NA	1.55e-07	rs4577309	12
ENSG00000164045	CDC25A	3	48198636	48229892	-1	protein_coding	993	CDC25A	0.979698	-0.724001	26	0.00017541	1.73e-15	GTEx/v8/Brain_Cerebellar_Hemisphere	NA	5.48e-05	rs10865954	15
ENSG00000229759	MRPS18AP1	3	48297840	48298428	-1	pseudogene	359761	MRPS18AP1	NA	NA	49	6.62e-05	1.29e-23	GTEx/v8/Brain_Cerebellum:GTEx/v8/Brain_Spinal_cord_cervical_c-1	NA	1.68e-07	rs10865954;rs7617480	15
ENSG00000232112	TMA7	3	48481667	48485616	1	protein_coding	51372	TMA7	0.0100073	0.321268	56	3.46e-05	2.31e-15	GTEx/v8/Brain_Cerebellar_Hemisphere:GTEx/v8/Brain_Cerebellum:GTEx/v8/Brain_Cortex	NA	1.68e-07	rs7617480	15
ENSG00000213689	TREX1	3	48506445	48509044	1	protein_coding	11277	TREX1	0.0933407	-0.110328	24	3.03e-05	2.14e-05	GTEx/v8/Brain_Caudate_basal_ganglia	NA	1.68e-07	rs7617480	15
ENSG00000145040	UCN2	3	48599160	48601206	-1	protein_coding	90226	UCN2	0.157236	0.00632674	1	0.00014568	0.00573708	GTEx/v8/Brain_Cerebellum	NA	0.002491	rs10865954	15
ENSG00000213672	NCKIPSD	3	48701364	48723797	-1	protein_coding	51517	NCKIPSD	0.00713136	-0.551018	201	3.6e-34	8.19e-28	GTEx/v8/Brain_Amygdala:GTEx/v8/Brain_Anterior_cingulate_cortex_BA24:GTEx/v8/Brain_Caudate_basal_ganglia:GTEx/v8/Brain_Cerebellar_Hemisphere:GTEx/v8/Brain_Cerebellum:GTEx/v8/Brain_Cortex:GTEx/v8/Brain_Frontal_Cortex_BA9:GTEx/v8/Brain_Hippocampus:GTEx/v8/Brain_Hypothalamus:GTEx/v8/Brain_Nucleus_accumbens_basal_ganglia:GTEx/v8/Brain_Putamen_basal_ganglia:GTEx/v8/Brain_Spinal_cord_cervical_c-1:GTEx/v…	NA	1.28e-11	rs10865954;rs7617480;rs2029591	15
ENSG00000114302	PRKAR2A	3	48782030	48885279	-1	protein_coding	5576	PRKAR2A	0.983251	-2.8684	78	3.58e-06	0.00904797	GTEx/v8/Brain_Substantia_nigra	NA	1.68e-07	rs7617480	15
ENSG00000178467	P4HTM	3	49027319	49044587	1	protein_coding	54681	P4HTM	0.0232749	NA	229	7e-12	3.79e-08	GTEx/v8/Brain_Caudate_basal_ganglia:GTEx/v8/Brain_Cerebellar_Hemisphere:GTEx/v8/Brain_Cerebellum:GTEx/v8/Brain_Cortex:GTEx/v8/Brain_Frontal_Cortex_BA9:GTEx/v8/Brain_Hippocampus:GTEx/v8/Brain_Hypothalamus:GTEx/v8/Brain_Nucleus_accumbens_basal_ganglia:GTEx/v8/Brain_Putamen_basal_ganglia:GTEx/v8/Brain_Spinal_cord_cervical_c-1	NA	1.28e-11	rs10865954;rs7617480;rs2029591	15
ENSG00000178252	WDR6	3	49044495	49053386	1	protein_coding	11180	WDR6	9.2e-07	-0.0589495	184	3.12e-27	1.3e-21	GTEx/v8/Brain_Amygdala:GTEx/v8/Brain_Caudate_basal_ganglia:GTEx/v8/Brain_Cerebellar_Hemisphere:GTEx/v8/Brain_Cerebellum:GTEx/v8/Brain_Cortex:GTEx/v8/Brain_Frontal_Cortex_BA9:GTEx/v8/Brain_Hippocampus:GTEx/v8/Brain_Nucleus_accumbens_basal_ganglia:GTEx/v8/Brain_Putamen_basal_ganglia:GTEx/v8/Brain_Spinal_cord_cervical_c-1:GTEx/v8/Brain_Substantia_nigra	NA	1.28e-11	rs10865954;rs7617480;rs2029591	15
ENSG00000178149	DALRD3	3	49052921	49059726	-1	protein_coding	55152	DALRD3	1.85e-05	0.0723068	228	1.06e-12	1.79e-09	GTEx/v8/Brain_Cerebellar_Hemisphere:GTEx/v8/Brain_Cerebellum:GTEx/v8/Brain_Cortex:GTEx/v8/Brain_Frontal_Cortex_BA9	NA	1.28e-11	rs10865954;rs7617480;rs2029591	15
ENSG00000198218	QRICH1	3	49067140	49131796	-1	protein_coding	54870	QRICH1	0.99607	-0.279294	193	3.39e-15	3.56e-12	GTEx/v8/Brain_Caudate_basal_ganglia:GTEx/v8/Brain_Cerebellar_Hemisphere:GTEx/v8/Brain_Cerebellum:GTEx/v8/Brain_Cortex:GTEx/v8/Brain_Nucleus_accumbens_basal_ganglia	NA	5.71e-11	rs7617480;rs10865954;rs2029591	15
ENSG00000270441	RP11-694I15.7	3	49177519	49198284	-1	pseudogene	NA	NA	NA	NA	222	3.06e-07	0.00034489	GTEx/v8/Brain_Cerebellar_Hemisphere:GTEx/v8/Brain_Cerebellum:GTEx/v8/Brain_Cortex:GTEx/v8/Brain_Substantia_nigra	NA	1.28e-11	rs10865954;rs7617480;rs2029591	15
ENSG00000177352	CCDC71	3	49199968	49203754	-1	protein_coding	64925	CCDC71	0.0169896	NA	192	9.42e-20	4.03e-15	GTEx/v8/Brain_Amygdala:GTEx/v8/Brain_Caudate_basal_ganglia:GTEx/v8/Brain_Cerebellar_Hemisphere:GTEx/v8/Brain_Cerebellum:GTEx/v8/Brain_Cortex:GTEx/v8/Brain_Frontal_Cortex_BA9:GTEx/v8/Brain_Hippocampus:GTEx/v8/Brain_Nucleus_accumbens_basal_ganglia:GTEx/v8/Brain_Putamen_basal_ganglia	NA	1.28e-11	rs7617480;rs2029591;rs10865954	15
ENSG00000185909	KLHDC8B	3	49209044	49213917	1	protein_coding	200942	KLHDC8B	0.0104214	-0.0773522	82	1.56e-06	0.00138032	GTEx/v8/Brain_Cerebellum	NA	1.28e-11	rs10865954;rs7617480	15
ENSG00000225399	RP11-3B7.1	3	49297518	49298744	1	protein_coding	NA	NA	NA	NA	12	7.14e-06	0.00866008	GTEx/v8/Brain_Anterior_cingulate_cortex_BA24	NA	1.28e-11	rs10865954;rs7617480	15
ENSG00000114316	USP4	3	49315264	49378145	-1	protein_coding	7375	USP4	6.2e-07	NA	43	3.9e-05	0.0111109	GTEx/v8/Brain_Cerebellum	NA	1.68e-07	rs7617480	15
ENSG00000233276	GPX1	3	49394609	49396033	-1	protein_coding	2876	GPX1	0.00693165	-0.616399	229	1.88e-15	5.9e-11	GTEx/v8/Brain_Anterior_cingulate_cortex_BA24:GTEx/v8/Brain_Caudate_basal_ganglia:GTEx/v8/Brain_Cerebellar_Hemisphere:GTEx/v8/Brain_Cerebellum:GTEx/v8/Brain_Cortex:GTEx/v8/Brain_Frontal_Cortex_BA9:GTEx/v8/Brain_Hippocampus:GTEx/v8/Brain_Nucleus_accumbens_basal_ganglia:GTEx/v8/Brain_Putamen_basal_ganglia	NA	1.28e-11	rs7617480;rs10865954;rs2029591	15
ENSG00000145020	AMT	3	49454211	49460186	-1	protein_coding	275	AMT	0.000569475	-0.0226371	229	2.15e-38	7.74e-32	GTEx/v8/Brain_Anterior_cingulate_cortex_BA24:GTEx/v8/Brain_Caudate_basal_ganglia:GTEx/v8/Brain_Cerebellar_Hemisphere:GTEx/v8/Brain_Cerebellum:GTEx/v8/Brain_Cortex:GTEx/v8/Brain_Frontal_Cortex_BA9:GTEx/v8/Brain_Hippocampus:GTEx/v8/Brain_Hypothalamus:GTEx/v8/Brain_Nucleus_accumbens_basal_ganglia:GTEx/v8/Brain_Putamen_basal_ganglia:GTEx/v8/Brain_Spinal_cord_cervical_c-1:GTEx/v8/Brain_Substantia_nigra	NA	1.28e-11	rs10865954;rs7617480;rs2029591	15
ENSG00000145029	NICN1	3	49460379	49466759	-1	protein_coding	84276	NICN1	0.257246	-1.08729	174	1.08e-07	9.43e-05	GTEx/v8/Brain_Caudate_basal_ganglia:GTEx/v8/Brain_Cerebellum:GTEx/v8/Brain_Cortex:GTEx/v8/Brain_Frontal_Cortex_BA9:GTEx/v8/Brain_Nucleus_accumbens_basal_ganglia	NA	5.71e-11	rs10865954;rs7617480	15
ENSG00000226913	BSN-AS2	3	49586739	49591799	-1	lincRNA	100132677	BSN-AS2	NA	NA	176	9.29e-08	4.94e-06	GTEx/v8/Brain_Cortex:GTEx/v8/Brain_Frontal_Cortex_BA9:GTEx/v8/Brain_Nucleus_accumbens_basal_ganglia:GTEx/v8/Brain_Putamen_basal_ganglia	NA	1.28e-11	rs10865954;rs7617480	15
ENSG00000164061	BSN	3	49591922	49708978	1	protein_coding	8927	BSN	1	-1.28511	1	0.00019672	0.0474433	GTEx/v8/Brain_Cerebellum	NA	1.79e-08	rs7617480	15
ENSG00000173531	MST1	3	49721380	49726934	-1	protein_coding	4485	MST1	1.73e-10	0.158165	6	7.97e-05	2.64e-05	GTEx/v8/Brain_Cerebellum	NA	6.79e-06	rs7617480	15
ENSG00000164068	RNF123	3	49726932	49758962	1	protein_coding	63891	RNF123	0.969715	-0.461991	217	1.13e-20	1.01e-15	GTEx/v8/Brain_Amygdala:GTEx/v8/Brain_Anterior_cingulate_cortex_BA24:GTEx/v8/Brain_Caudate_basal_ganglia:GTEx/v8/Brain_Cerebellar_Hemisphere:GTEx/v8/Brain_Cerebellum:GTEx/v8/Brain_Cortex:GTEx/v8/Brain_Frontal_Cortex_BA9:GTEx/v8/Brain_Hypothalamus:GTEx/v8/Brain_Nucleus_accumbens_basal_ganglia:GTEx/v8/Brain_Putamen_basal_ganglia:GTEx/v8/Brain_Spinal_cord_cervical_c-1	NA	6.26e-11	rs6446187;rs3774750;rs4688760;rs2029591;rs7617480	15
ENSG00000173540	GMPPB	3	49754277	49761384	-1	protein_coding	29925	GMPPB	8.25e-05	-0.659554	380	3.5e-35	1.8e-28	GTEx/v8/Brain_Amygdala:GTEx/v8/Brain_Anterior_cingulate_cortex_BA24:GTEx/v8/Brain_Caudate_basal_ganglia:GTEx/v8/Brain_Cerebellar_Hemisphere:GTEx/v8/Brain_Cerebellum:GTEx/v8/Brain_Cortex:GTEx/v8/Brain_Frontal_Cortex_BA9:GTEx/v8/Brain_Hippocampus:GTEx/v8/Brain_Hypothalamus:GTEx/v8/Brain_Nucleus_accumbens_basal_ganglia:GTEx/v8/Brain_Putamen_basal_ganglia:GTEx/v8/Brain_Spinal_cord_cervical_c-1:GTEx/v…	NA	1.28e-11	rs7617480;rs10865954;rs2029591;rs6446187;rs3774750;rs4688760	15
ENSG00000185614	FAM212A	3	49840687	49842463	1	protein_coding	389119	FAM212A	0.000589161	NA	207	2.49e-29	2.06e-23	GTEx/v8/Brain_Cerebellar_Hemisphere:GTEx/v8/Brain_Cerebellum	NA	6.26e-11	rs2029591;rs6446187;rs4688760;rs3774750	15
ENSG00000164078	MST1R	3	49924435	49941299	-1	protein_coding	4486	MST1R	1.69e-20	-0.377645	164	1.48e-19	6.29e-15	GTEx/v8/Brain_Anterior_cingulate_cortex_BA24:GTEx/v8/Brain_Caudate_basal_ganglia:GTEx/v8/Brain_Cerebellar_Hemisphere:GTEx/v8/Brain_Cerebellum:GTEx/v8/Brain_Cortex:GTEx/v8/Brain_Nucleus_accumbens_basal_ganglia:GTEx/v8/Brain_Spinal_cord_cervical_c-1	NA	6.26e-11	rs6446187;rs3774750;rs4688760	15
ENSG00000004534	RBM6	3	49977440	50137478	1	protein_coding	10180	RBM6	1	-0.685653	209	4.67e-42	1.61e-34	GTEx/v8/Brain_Amygdala:GTEx/v8/Brain_Anterior_cingulate_cortex_BA24:GTEx/v8/Brain_Caudate_basal_ganglia:GTEx/v8/Brain_Cerebellar_Hemisphere:GTEx/v8/Brain_Cerebellum:GTEx/v8/Brain_Cortex:GTEx/v8/Brain_Frontal_Cortex_BA9:GTEx/v8/Brain_Hippocampus:GTEx/v8/Brain_Hypothalamus:GTEx/v8/Brain_Nucleus_accumbens_basal_ganglia:GTEx/v8/Brain_Putamen_basal_ganglia:GTEx/v8/Brain_Spinal_cord_cervical_c-1:GTEx/v…	NA	6.26e-11	rs6446187;rs3774750;rs4688760;rs2029591	15
ENSG00000235016	RP11-493K19.3	3	50153455	50193518	-1	antisense	100129060	SEMA3F-AS1	NA	NA	103	2.35e-05	0.0133782	GTEx/v8/Brain_Cerebellar_Hemisphere	NA	6.26e-11	rs6446187;rs3774750	15
ENSG00000001617	SEMA3F	3	50192478	50226508	1	protein_coding	6405	SEMA3F	0.999918	NA	4	8.49e-06	0.00761782	GTEx/v8/Brain_Cortex	NA	0.0003024	rs3774750	15
ENSG00000186792	HYAL3	3	50330262	50336899	-1	protein_coding	8372	HYAL3	1.52e-05	-0.35315	198	4.43e-09	6.63e-23	GTEx/v8/Brain_Anterior_cingulate_cortex_BA24:GTEx/v8/Brain_Caudate_basal_ganglia:GTEx/v8/Brain_Cerebellar_Hemisphere:GTEx/v8/Brain_Cerebellum:GTEx/v8/Brain_Cortex:GTEx/v8/Brain_Frontal_Cortex_BA9:GTEx/v8/Brain_Hippocampus:GTEx/v8/Brain_Hypothalamus:GTEx/v8/Brain_Nucleus_accumbens_basal_ganglia:GTEx/v8/Brain_Putamen_basal_ganglia:GTEx/v8/Brain_Spinal_cord_cervical_c-1	NA	6.26e-11	rs4688760;rs3774750;rs2029591;rs6446187;rs7617480	15
ENSG00000243477	NAT6	3	50333833	50336852	-1	protein_coding	24142	NAT6	0.402945	-0.113189	17	2.41e-06	1.51e-13	GTEx/v8/Brain_Anterior_cingulate_cortex_BA24:GTEx/v8/Brain_Cortex:GTEx/v8/Brain_Frontal_Cortex_BA9	NA	2.5e-10	rs3774750;rs6446187;rs4688760	15
ENSG00000068028	RASSF1	3	50367219	50378411	-1	protein_coding	11186	RASSF1	4.86e-08	-0.411947	8	8.15e-05	0.00077916	GTEx/v8/Brain_Cerebellum	NA	9.51e-09	rs3774750	15
ENSG00000247828	TMEM161B-AS1	5	87564712	87732502	1	antisense	100505894	TMEM161B-AS1	NA	NA	37	1.46e-17	5.03e-25	GTEx/v8/Brain_Anterior_cingulate_cortex_BA24:GTEx/v8/Brain_Caudate_basal_ganglia:GTEx/v8/Brain_Cerebellar_Hemisphere:GTEx/v8/Brain_Cerebellum:GTEx/v8/Brain_Cortex:GTEx/v8/Brain_Frontal_Cortex_BA9:GTEx/v8/Brain_Hippocampus:GTEx/v8/Brain_Hypothalamus:GTEx/v8/Brain_Nucleus_accumbens_basal_ganglia:GTEx/v8/Brain_Putamen_basal_ganglia:GTEx/v8/Brain_Spinal_cord_cervical_c-1:GTEx/v8/Brain_Substantia_nigra	NA	8.76e-09	rs247909	18
ENSG00000250156	CTC-498M16.2	5	87704799	87734907	-1	lincRNA	102546226	LINC02060	NA	NA	2	2.69e-05	0.0123678	GTEx/v8/Brain_Cerebellum	NA	1.09e-05	rs247909	18
ENSG00000271904	CTC-498M16.4	5	87729709	87794514	-1	lincRNA	NA	NA	NA	NA	70	1.74e-20	7.15e-17	GTEx/v8/Brain_Amygdala:GTEx/v8/Brain_Anterior_cingulate_cortex_BA24:GTEx/v8/Brain_Caudate_basal_ganglia:GTEx/v8/Brain_Cerebellum:GTEx/v8/Brain_Cortex:GTEx/v8/Brain_Frontal_Cortex_BA9:GTEx/v8/Brain_Hippocampus:GTEx/v8/Brain_Hypothalamus:GTEx/v8/Brain_Nucleus_accumbens_basal_ganglia:GTEx/v8/Brain_Putamen_basal_ganglia:GTEx/v8/Brain_Substantia_nigra	NA	8.76e-09	rs247909;rs27732	18
ENSG00000250377	CTC-467M3.3	5	87988462	87989789	-1	lincRNA	NA	NA	NA	NA	35	9.46e-07	0.00024363	GTEx/v8/Brain_Anterior_cingulate_cortex_BA24:GTEx/v8/Brain_Cerebellar_Hemisphere:GTEx/v8/Brain_Frontal_Cortex_BA9	NA	1.36e-08	rs247909;rs27732	18
ENSG00000186470	BTN3A2	6	26365387	26378546	1	protein_coding	11118	BTN3A2	0.000124519	2.20791	144	3.54e-28	8.58e-22	GTEx/v8/Brain_Amygdala:GTEx/v8/Brain_Anterior_cingulate_cortex_BA24:GTEx/v8/Brain_Caudate_basal_ganglia:GTEx/v8/Brain_Cerebellar_Hemisphere:GTEx/v8/Brain_Cerebellum:GTEx/v8/Brain_Cortex:GTEx/v8/Brain_Frontal_Cortex_BA9:GTEx/v8/Brain_Hippocampus:GTEx/v8/Brain_Hypothalamus:GTEx/v8/Brain_Nucleus_accumbens_basal_ganglia:GTEx/v8/Brain_Putamen_basal_ganglia:GTEx/v8/Brain_Spinal_cord_cervical_c-1:GTEx/v…	NA	2.96e-08	rs71557335	21
ENSG00000124508	BTN2A2	6	26383324	26395102	1	protein_coding	10385	BTN2A2	0.000150288	1.01572	9	0.0001185	1.16e-15	GTEx/v8/Brain_Caudate_basal_ganglia:GTEx/v8/Brain_Nucleus_accumbens_basal_ganglia	NA	5.8e-05	rs71557335	21
ENSG00000124549	BTN2A3P	6	26421619	26432611	1	pseudogene	54718	BTN2A3P	NA	NA	72	9.97e-05	0.0348788	GTEx/v8/Brain_Cerebellum	NA	2.96e-08	rs71557335	21
ENSG00000111801	BTN3A3	6	26440700	26453643	1	protein_coding	10384	BTN3A3	7.19e-10	1.09011	130	3.98e-07	4.02e-07	GTEx/v8/Brain_Cerebellar_Hemisphere:GTEx/v8/Brain_Cortex	NA	2.96e-08	rs71557335	21
ENSG00000228223	HCG11	6	26522076	26526807	1	lincRNA	493812	HCG11	NA	NA	107	2.48e-05	0.0230267	GTEx/v8/Brain_Cerebellum	NA	2.96e-08	rs71557335	21
ENSG00000197903	HIST1H2BK	6	27106073	27114619	-1	protein_coding	85236	HIST1H2BK	0.490754	-0.0430523	10	5.61e-05	0.0120885	GTEx/v8/Brain_Cerebellum	NA	2.28e-06	rs71557335	21
ENSG00000112812	PRSS16	6	27215480	27224403	1	protein_coding	10279	PRSS16	2.24e-06	0.00884812	288	4.61e-10	3.97e-11	GTEx/v8/Brain_Cerebellar_Hemisphere:GTEx/v8/Brain_Cerebellum	NA	1.67e-08	rs71557335;rs4713177	21:22:00
ENSG00000219891	ZSCAN12P1	6	28058932	28061442	1	pseudogene	221584	ZSCAN12P1	NA	NA	21	2.3e-05	0.0182695	GTEx/v8/Brain_Cerebellum	NA	9.56e-06	rs4713177	22
ENSG00000219392	RP1-265C24.5	6	28083406	28084329	1	pseudogene	NA	NA	NA	NA	314	5.91e-14	6.42e-22	GTEx/v8/Brain_Amygdala:GTEx/v8/Brain_Anterior_cingulate_cortex_BA24:GTEx/v8/Brain_Caudate_basal_ganglia:GTEx/v8/Brain_Cerebellar_Hemisphere:GTEx/v8/Brain_Cerebellum:GTEx/v8/Brain_Cortex:GTEx/v8/Brain_Frontal_Cortex_BA9:GTEx/v8/Brain_Hippocampus:GTEx/v8/Brain_Hypothalamus:GTEx/v8/Brain_Nucleus_accumbens_basal_ganglia:GTEx/v8/Brain_Putamen_basal_ganglia:GTEx/v8/Brain_Substantia_nigra	NA	3.64e-10	rs4713177	22
ENSG00000198315	ZKSCAN8	6	28109688	28127250	1	protein_coding	7745	ZKSCAN8	0.000231595	-0.142528	235	2.23e-08	3.82e-07	GTEx/v8/Brain_Cerebellum:GTEx/v8/Brain_Cortex:GTEx/v8/Brain_Frontal_Cortex_BA9:GTEx/v8/Brain_Hippocampus:GTEx/v8/Brain_Nucleus_accumbens_basal_ganglia	NA	8.33e-10	rs4713177	22
ENSG00000226314	ZNF192P1	6	28129559	28137372	1	pseudogene	651302	ZNF192P1	NA	NA	318	8.25e-14	7.29e-32	GTEx/v8/Brain_Cerebellar_Hemisphere:GTEx/v8/Brain_Cerebellum:GTEx/v8/Brain_Cortex	NA	3.64e-10	rs4713177	22
ENSG00000216901	AL022393.7	6	28143966	28144452	1	pseudogene	NA	NA	NA	NA	319	8.47e-21	2.39e-38	GTEx/v8/Brain_Amygdala:GTEx/v8/Brain_Anterior_cingulate_cortex_BA24:GTEx/v8/Brain_Caudate_basal_ganglia:GTEx/v8/Brain_Cerebellar_Hemisphere:GTEx/v8/Brain_Cerebellum:GTEx/v8/Brain_Cortex:GTEx/v8/Brain_Frontal_Cortex_BA9:GTEx/v8/Brain_Hippocampus:GTEx/v8/Brain_Hypothalamus:GTEx/v8/Brain_Nucleus_accumbens_basal_ganglia:GTEx/v8/Brain_Putamen_basal_ganglia:GTEx/v8/Brain_Spinal_cord_cervical_c-1:GTEx/v…	NA	3.64e-10	rs4713177	22
ENSG00000218016	ZNF192P2	6	28155828	28157210	1	pseudogene	222701	ZNF192P2	NA	NA	29	3.05e-05	2.78e-11	GTEx/v8/Brain_Cerebellum:GTEx/v8/Brain_Cortex	NA	4.87e-07	rs4713177	22
ENSG00000137185	ZSCAN9	6	28192664	28201260	1	protein_coding	7746	ZSCAN9	4.1e-08	0.461166	311	9.25e-09	3.39e-05	GTEx/v8/Brain_Cerebellar_Hemisphere:GTEx/v8/Brain_Cerebellum:GTEx/v8/Brain_Hippocampus	NA	3.64e-10	rs4713177	22
ENSG00000197062	RP5-874C20.3	6	28234788	28245974	1	pseudogene	7741	ZSCAN26	NA	NA	329	2.36e-12	1.99e-20	GTEx/v8/Brain_Anterior_cingulate_cortex_BA24:GTEx/v8/Brain_Caudate_basal_ganglia:GTEx/v8/Brain_Cerebellar_Hemisphere:GTEx/v8/Brain_Cerebellum:GTEx/v8/Brain_Cortex:GTEx/v8/Brain_Frontal_Cortex_BA9:GTEx/v8/Brain_Hypothalamus:GTEx/v8/Brain_Nucleus_accumbens_basal_ganglia:GTEx/v8/Brain_Putamen_basal_ganglia	NA	3.64e-10	rs4713177	22
ENSG00000137338	PGBD1	6	28249314	28270326	1	protein_coding	84547	PGBD1	1.47e-05	-0.0800605	220	1.02e-07	9.81e-05	GTEx/v8/Brain_Caudate_basal_ganglia:GTEx/v8/Brain_Cerebellar_Hemisphere:GTEx/v8/Brain_Cerebellum:GTEx/v8/Brain_Spinal_cord_cervical_c-1	NA	1.2e-09	rs4713177	22
ENSG00000270326	RP5-874C20.6	6	28287437	28287629	-1	pseudogene	NA	NA	NA	NA	156	5.76e-05	0.0234672	GTEx/v8/Brain_Cerebellar_Hemisphere	NA	1.2e-09	rs4713177	22
ENSG00000235109	ZSCAN31	6	28292470	28324048	-1	protein_coding	64288	ZSCAN31	3.77e-09	1.10713	296	1.15e-10	4.3e-20	GTEx/v8/Brain_Amygdala:GTEx/v8/Brain_Anterior_cingulate_cortex_BA24:GTEx/v8/Brain_Caudate_basal_ganglia:GTEx/v8/Brain_Cortex:GTEx/v8/Brain_Frontal_Cortex_BA9:GTEx/v8/Brain_Hippocampus:GTEx/v8/Brain_Hypothalamus:GTEx/v8/Brain_Nucleus_accumbens_basal_ganglia:GTEx/v8/Brain_Putamen_basal_ganglia:GTEx/v8/Brain_Spinal_cord_cervical_c-1:GTEx/v8/Brain_Substantia_nigra	NA	3.64e-10	rs4713177	22
ENSG00000187987	ZSCAN23	6	28399707	28411279	-1	protein_coding	222696	ZSCAN23	0.00270295	0.0706565	66	1.59e-05	1.53e-18	GTEx/v8/Brain_Cerebellar_Hemisphere:GTEx/v8/Brain_Cerebellum:GTEx/v8/Brain_Cortex:GTEx/v8/Brain_Spinal_cord_cervical_c-1	NA	2.63e-09	rs4713177	22
ENSG00000232040	SCAND3	6	28539407	28583989	-1	protein_coding	114821	SCAND3	9.71e-09	-0.785031	5	4.07e-05	0.00650232	GTEx/v8/Brain_Hippocampus	NA	0.002615	rs4713177	22
ENSG00000235570	LINC00533	6	28616063	28616843	-1	lincRNA	387055	LINC00533	NA	NA	5	2.95e-05	0.00376228	GTEx/v8/Brain_Cerebellar_Hemisphere	NA	0.002615	rs4713177	22
ENSG00000225173	XXbac-BPG308K3.5	6	28805646	28806783	-1	lincRNA	NA	NA	NA	NA	25	3.67e-05	0.0285075	GTEx/v8/Brain_Putamen_basal_ganglia	NA	4.87e-07	rs4713177	22
ENSG00000204709	C6orf100	6	28911654	28912314	1	protein_coding	729583	C6orf100	NA	NA	3	5.99e-05	0.00637638	GTEx/v8/Brain_Cortex	NA	2.63e-09	rs4713177	22
ENSG00000112249	ASCC3	6	100956070	101329248	-1	protein_coding	10973	ASCC3	1.43e-10	0.106686	220	3.78e-09	1.6e-05	GTEx/v8/Brain_Caudate_basal_ganglia:GTEx/v8/Brain_Cerebellum:GTEx/v8/Brain_Cortex	NA	6.14e-09	rs7753317;rs9322076;rs7769142	24
ENSG00000260000	RP3-467N11.1	6	101329347	101330863	1	antisense	NA	NA	NA	NA	42	5.49e-06	0.00070177	GTEx/v8/Brain_Anterior_cingulate_cortex_BA24:GTEx/v8/Brain_Cerebellum:GTEx/v8/Brain_Nucleus_accumbens_basal_ganglia	NA	7.79e-09	rs7753317;rs9322076;rs7769142	24
ENSG00000085382	HACE1	6	105175968	105307794	-1	protein_coding	57531	HACE1	0.00159566	-0.519621	31	5.8e-10	1.04e-19	GTEx/v8/Brain_Cerebellar_Hemisphere:GTEx/v8/Brain_Cerebellum:GTEx/v8/Brain_Cortex:GTEx/v8/Brain_Frontal_Cortex_BA9:GTEx/v8/Brain_Nucleus_accumbens_basal_ganglia:GTEx/v8/Brain_Putamen_basal_ganglia	NA	1.49e-09	rs370771;rs395523	25
ENSG00000203809	LINC00577	6	105384169	105388402	-1	lincRNA	100113403	LINC00577	NA	NA	52	2.47e-07	0.00159178	GTEx/v8/Brain_Caudate_basal_ganglia:GTEx/v8/Brain_Cortex:GTEx/v8/Brain_Putamen_basal_ganglia	NA	1.49e-09	rs370771;rs395523	25
ENSG00000225146	AC073957.15	7	1068661	1083527	1	antisense	NA	NA	NA	NA	11	7.3e-06	9.32e-05	GTEx/v8/Brain_Cerebellar_Hemisphere	NA	6.47e-09	rs7809203	26
ENSG00000164849	GPR146	7	1084212	1098897	1	protein_coding	115330	GPR146	0.00279413	0.3554	67	5.3e-15	4.81e-13	GTEx/v8/Brain_Cerebellar_Hemisphere:GTEx/v8/Brain_Cerebellum	NA	2.18e-09	rs7809203;rs6945202	26
ENSG00000224079	AC091729.7	7	1114086	1117672	1	antisense	NA	NA	NA	NA	45	2.51e-08	2.41e-13	GTEx/v8/Brain_Caudate_basal_ganglia:GTEx/v8/Brain_Cerebellar_Hemisphere:GTEx/v8/Brain_Cerebellum	NA	2.18e-09	rs7809203;rs6945202	26
ENSG00000178381	ZFAND2A	7	1191707	1200395	-1	protein_coding	90637	ZFAND2A	0.000389857	NA	4	1.03e-06	0.00557652	GTEx/v8/Brain_Spinal_cord_cervical_c-1	NA	2.18e-09	rs7809203	26
ENSG00000229043	AC091729.9	7	1200010	1204903	1	antisense	NA	NA	NA	NA	67	6.22e-44	1.25e-56	GTEx/v8/Brain_Amygdala:GTEx/v8/Brain_Anterior_cingulate_cortex_BA24:GTEx/v8/Brain_Caudate_basal_ganglia:GTEx/v8/Brain_Cerebellar_Hemisphere:GTEx/v8/Brain_Cerebellum:GTEx/v8/Brain_Cortex:GTEx/v8/Brain_Frontal_Cortex_BA9:GTEx/v8/Brain_Hippocampus:GTEx/v8/Brain_Hypothalamus:GTEx/v8/Brain_Nucleus_accumbens_basal_ganglia:GTEx/v8/Brain_Putamen_basal_ganglia:GTEx/v8/Brain_Spinal_cord_cervical_c-1:GTEx/v…	NA	2.18e-09	rs7809203;rs6945202	26
ENSG00000176349	AC110781.3	7	1878222	1889567	1	protein_coding	NA	NA	NA	NA	35	3.26e-07	2.61e-06	GTEx/v8/Brain_Nucleus_accumbens_basal_ganglia	NA	1.49e-08	rs11773627;rs11760737	27
ENSG00000122687	FTSJ2	7	2273866	2281840	-1	protein_coding	29960	FTSJ2	1.97e-05	0.0965957	47	1.66e-07	4.01e-12	GTEx/v8/Brain_Caudate_basal_ganglia:GTEx/v8/Brain_Cerebellar_Hemisphere	NA	1.49e-08	rs11773627;rs11760737	27
ENSG00000272479	RP11-301G7.1	8	40377084	40377677	-1	lincRNA	NA	NA	NA	NA	63	1.36e-09	1.44e-05	GTEx/v8/Brain_Caudate_basal_ganglia:GTEx/v8/Brain_Cortex:GTEx/v8/Brain_Frontal_Cortex_BA9	NA	4.01e-09	rs2722442;rs11783990	32
ENSG00000227603	RP11-165J3.6	9	96197614	96199403	-1	antisense	NA	NA	NA	NA	3	6.74e-05	9.43e-18	GTEx/v8/Brain_Cerebellum	NA	3.63e-06	rs10156602	35
ENSG00000188938	FAM120AOS	9	96208776	96215874	-1	protein_coding	158293	FAM120AOS	0.514391	0.00743144	17	3.05e-05	0.0392076	GTEx/v8/Brain_Cerebellum	NA	3.92e-12	rs10156602	35
ENSG00000148110	HIATL1	9	97136833	97223324	1	protein_coding	84641	HIATL1	0.0239502	-0.606655	9	3.29e-05	0.00154759	GTEx/v8/Brain_Anterior_cingulate_cortex_BA24	NA	4.16e-12	rs10156602	35
ENSG00000138111	TMEM180	10	104221149	104236802	1	protein_coding	79847	TMEM180	0.000178664	2.88275	16	1.87e-09	4.09e-26	GTEx/v8/Brain_Cerebellar_Hemisphere:GTEx/v8/Brain_Cerebellum	NA	2.58e-09	rs12767131	37
ENSG00000138107	ACTR1A	10	104238986	104262482	-1	protein_coding	10121	ACTR1A	0.941234	-0.272535	17	1.42e-08	2.85e-08	GTEx/v8/Brain_Caudate_basal_ganglia:GTEx/v8/Brain_Putamen_basal_ganglia:GTEx/v8/Brain_Spinal_cord_cervical_c-1	NA	2.58e-09	rs12767131	37
ENSG00000272933	RP11-47A8.5	10	104402549	104403897	-1	lincRNA	NA	NA	NA	NA	3	7.75e-06	0.0110646	GTEx/v8/Brain_Caudate_basal_ganglia:GTEx/v8/Brain_Nucleus_accumbens_basal_ganglia	NA	0.0001612	rs12767131	37
ENSG00000138175	ARL3	10	104433488	104474164	-1	protein_coding	403	ARL3	0.716101	-0.600026	56	2.54e-06	3.19e-05	GTEx/v8/Brain_Cerebellum	NA	6.35e-13	rs10509759	37
ENSG00000203886	CYP17A1-AS1	10	104592478	104594273	1	antisense	102724307	CYP17A1-AS1	NA	NA	6	6.16e-05	0.0459683	GTEx/v8/Brain_Cerebellum	NA	1.09e-12	rs10509759	37
ENSG00000214435	AS3MT	10	104629273	104661656	1	protein_coding	57412	AS3MT	5.09e-07	0.726881	22	4.1e-06	6.43e-34	GTEx/v8/Brain_Caudate_basal_ganglia:GTEx/v8/Brain_Cerebellum:GTEx/v8/Brain_Hypothalamus	NA	1.49e-12	rs12767131;rs10509759	37
ENSG00000272912	RP11-724N1.1	10	104674342	104675161	1	lincRNA	NA	NA	NA	NA	1	8.16e-05	3.13e-16	GTEx/v8/Brain_Cerebellum	NA	8.5e-12	rs10509759	37
ENSG00000148842	CNNM2	10	104678050	104849978	1	protein_coding	54805	CNNM2	0.994106	-0.511524	53	2.23e-06	0.00023971	GTEx/v8/Brain_Cerebellum:GTEx/v8/Brain_Frontal_Cortex_BA9	NA	6.35e-13	rs10509759	37
ENSG00000076685	NT5C2	10	104845940	104953056	-1	protein_coding	22978	NT5C2	0.0521979	0.0483286	16	1.64e-05	3.58e-05	GTEx/v8/Brain_Cortex:GTEx/v8/Brain_Hippocampus	NA	1.09e-12	rs10509759	37
ENSG00000138172	CALHM2	10	105206543	105212660	-1	protein_coding	51063	CALHM2	5.29e-07	-0.689941	1	3.27e-05	0.0132227	GTEx/v8/Brain_Putamen_basal_ganglia	NA	0.0002247	rs10509759	37
ENSG00000134575	ACP2	11	47260853	47270457	-1	protein_coding	53	ACP2	0.000525977	-0.370782	4	4.4e-05	4.92e-13	GTEx/v8/Brain_Cerebellum	NA	7.29e-06	rs7111957	38
ENSG00000025434	NR1H3	11	47269851	47290396	1	protein_coding	10062	NR1H3	0.856186	0.657584	13	2.32e-06	0.00187378	GTEx/v8/Brain_Cerebellar_Hemisphere	NA	1.25e-08	rs7111957	38
ENSG00000110514	MADD	11	47290712	47351582	1	protein_coding	8567	MADD	0.000901823	-0.37505	57	5.16e-06	6.5e-13	GTEx/v8/Brain_Cerebellar_Hemisphere:GTEx/v8/Brain_Cerebellum	NA	7.6e-09	rs7111957	38
ENSG00000255197	RP11-750H9.5	11	47404699	47430741	-1	antisense	NA	NA	NA	NA	83	1.79e-08	1.2e-07	GTEx/v8/Brain_Cerebellar_Hemisphere:GTEx/v8/Brain_Cerebellum	NA	7.6e-09	rs7111957	38
ENSG00000165915	SLC39A13	11	47428683	47438047	1	protein_coding	91252	SLC39A13	0.011852	-0.332419	106	7.24e-08	8.67e-07	GTEx/v8/Brain_Anterior_cingulate_cortex_BA24:GTEx/v8/Brain_Caudate_basal_ganglia:GTEx/v8/Brain_Cerebellum:GTEx/v8/Brain_Cortex:GTEx/v8/Brain_Frontal_Cortex_BA9	NA	1.24e-09	rs7111957;rs1228001	38
ENSG00000165916	PSMC3	11	47440320	47447993	-1	protein_coding	5702	PSMC3	0.9792	-0.404697	104	4.45e-08	8.13e-07	GTEx/v8/Brain_Cerebellar_Hemisphere:GTEx/v8/Brain_Cerebellum:GTEx/v8/Brain_Cortex	NA	7.6e-09	rs7111957;rs1228001	38
ENSG00000165917	RAPSN	11	47459308	47470730	-1	protein_coding	5913	RAPSN	0.0326445	0.0487816	78	1.4e-06	0.00066453	GTEx/v8/Brain_Caudate_basal_ganglia:GTEx/v8/Brain_Cortex:GTEx/v8/Brain_Putamen_basal_ganglia	NA	1.07e-08	rs7111957;rs1228001	38
ENSG00000213619	NDUFS3	11	47586888	47606114	1	protein_coding	4722	NDUFS3	0.047137	-0.0123446	106	2e-08	1.17e-05	GTEx/v8/Brain_Cerebellar_Hemisphere:GTEx/v8/Brain_Cerebellum	NA	7.6e-09	rs7111957	38
ENSG00000196666	FAM180B	11	47608198	47610746	1	protein_coding	399888	FAM180B	0.315838	NA	108	1.62e-09	4.63e-06	GTEx/v8/Brain_Caudate_basal_ganglia:GTEx/v8/Brain_Cerebellar_Hemisphere:GTEx/v8/Brain_Cerebellum:GTEx/v8/Brain_Cortex:GTEx/v8/Brain_Frontal_Cortex_BA9:GTEx/v8/Brain_Nucleus_accumbens_basal_ganglia:GTEx/v8/Brain_Putamen_basal_ganglia	NA	1.24e-09	rs7111957;rs1228001	38
ENSG00000172247	C1QTNF4	11	47611216	47616211	-1	protein_coding	114900	C1QTNF4	0.679081	NA	108	6.4e-11	3.26e-07	GTEx/v8/Brain_Caudate_basal_ganglia:GTEx/v8/Brain_Cerebellar_Hemisphere:GTEx/v8/Brain_Cerebellum:GTEx/v8/Brain_Cortex	NA	1.24e-09	rs7111957;rs1228001	38
ENSG00000109919	MTCH2	11	47638867	47664175	-1	protein_coding	23788	MTCH2	0.166788	0.0369336	353	2.51e-20	9.46e-15	GTEx/v8/Brain_Amygdala:GTEx/v8/Brain_Anterior_cingulate_cortex_BA24:GTEx/v8/Brain_Caudate_basal_ganglia:GTEx/v8/Brain_Cerebellar_Hemisphere:GTEx/v8/Brain_Cerebellum:GTEx/v8/Brain_Cortex:GTEx/v8/Brain_Frontal_Cortex_BA9:GTEx/v8/Brain_Hippocampus:GTEx/v8/Brain_Hypothalamus:GTEx/v8/Brain_Nucleus_accumbens_basal_ganglia:GTEx/v8/Brain_Putamen_basal_ganglia	NA	1.24e-09	rs7111957;rs1228001;rs11040048;rs75184591	38
ENSG00000149177	PTPRJ	11	48002113	48189670	1	protein_coding	5795	PTPRJ	2.39e-05	NA	3	7.86e-05	0.00466638	GTEx/v8/Brain_Spinal_cord_cervical_c-1	NA	1.88e-06	rs11040048	38
ENSG00000086205	FOLH1	11	49168187	49230222	-1	protein_coding	2346	FOLH1	0.253397	-0.0941583	568	2.09e-07	1.48e-06	GTEx/v8/Brain_Caudate_basal_ganglia:GTEx/v8/Brain_Cerebellum:GTEx/v8/Brain_Cortex:GTEx/v8/Brain_Hypothalamus:GTEx/v8/Brain_Nucleus_accumbens_basal_ganglia:GTEx/v8/Brain_Putamen_basal_ganglia:GTEx/v8/Brain_Spinal_cord_cervical_c-1	NA	1.04e-08	rs75184591;rs11040048	38
ENSG00000205035	RP11-707M1.1	11	49580098	49831971	1	pseudogene	440040	LOC440040	NA	NA	66	1.13e-13	1.43e-34	GTEx/v8/Brain_Anterior_cingulate_cortex_BA24:GTEx/v8/Brain_Caudate_basal_ganglia:GTEx/v8/Brain_Cerebellum:GTEx/v8/Brain_Cortex:GTEx/v8/Brain_Frontal_Cortex_BA9:GTEx/v8/Brain_Hippocampus:GTEx/v8/Brain_Nucleus_accumbens_basal_ganglia:GTEx/v8/Brain_Putamen_basal_ganglia	NA	2.42e-08	rs11040048;rs75184591	38
ENSG00000219061	TRIM51FP	11	49854692	49860872	-1	pseudogene	283257	TRIM51FP	NA	NA	39	9.05e-10	3.69e-12	GTEx/v8/Brain_Caudate_basal_ganglia:GTEx/v8/Brain_Cortex:GTEx/v8/Brain_Frontal_Cortex_BA9	NA	2.03e-07	rs11040048;rs75184591	38
ENSG00000254714	RP11-163O19.1	11	49872181	49884080	1	pseudogene	NA	NA	NA	NA	8	2.92e-05	0.00257445	GTEx/v8/Brain_Anterior_cingulate_cortex_BA24	NA	2.26e-06	rs11040048	38
ENSG00000255190	TRIM51DP	11	49896497	49898190	1	pseudogene	100419945	TRIM51DP	NA	NA	103	3.6e-20	8.08e-23	GTEx/v8/Brain_Amygdala:GTEx/v8/Brain_Anterior_cingulate_cortex_BA24:GTEx/v8/Brain_Caudate_basal_ganglia:GTEx/v8/Brain_Cortex:GTEx/v8/Brain_Frontal_Cortex_BA9:GTEx/v8/Brain_Hippocampus:GTEx/v8/Brain_Hypothalamus:GTEx/v8/Brain_Nucleus_accumbens_basal_ganglia:GTEx/v8/Brain_Putamen_basal_ganglia	NA	2.81e-08	rs11040048;rs75184591	38
ENSG00000149150	SLC43A1	11	57252007	57283259	-1	protein_coding	8501	SLC43A1	7.85e-05	-0.136928	2	4.46e-05	2.48e-08	GTEx/v8/Brain_Cerebellum	NA	1.09e-08	rs2509805	39
ENSG00000134809	TIMM10	11	57295936	57298276	-1	protein_coding	26519	TIMM10	0.00949476	0.00010008	3	1.74e-05	7.82e-13	GTEx/v8/Brain_Caudate_basal_ganglia	NA	8.91e-10	rs2509805	39
ENSG00000156603	MED19	11	57471186	57479693	-1	protein_coding	219541	MED19	0.68379	-0.1517	57	5.44e-06	5.15e-07	GTEx/v8/Brain_Cerebellar_Hemisphere:GTEx/v8/Brain_Cerebellum	NA	6.05e-10	rs2509805	39
ENSG00000242689	CNTF	11	58390146	58393198	1	protein_coding	1270	CNTF	0.000349252	-0.109965	34	1.6e-05	0.0192174	GTEx/v8/Brain_Cortex	NA	6.05e-10	rs2509805	39
ENSG00000087365	SF3B2	11	65818200	65836779	1	protein_coding	10992	SF3B2	0.99946	-0.0687926	1	6.04e-05	1.27e-37	GTEx/v8/Brain_Cerebellum	NA	0.009401	rs801733	40
ENSG00000110906	KCTD10	12	109886461	109915349	-1	protein_coding	83892	KCTD10	0.17267	0.585873	166	2.7e-07	0.00078146	GTEx/v8/Brain_Cerebellar_Hemisphere:GTEx/v8/Brain_Cerebellum	NA	1.9e-08	rs6606728	42
ENSG00000139428	MMAB	12	109991542	110011679	-1	protein_coding	326625	MMAB	0.00387716	2.91819	6	7.13e-06	3.85e-05	GTEx/v8/Brain_Caudate_basal_ganglia:GTEx/v8/Brain_Frontal_Cortex_BA9	NA	1.33e-08	rs35393419	42
ENSG00000110921	MVK	12	110011060	110035067	1	protein_coding	4598	MVK	0.0421614	-0.508882	3	5.71e-06	0.0075442	GTEx/v8/Brain_Cortex	NA	0.0002036	rs6606728	42
ENSG00000120697	ALG5	13	37523912	37574398	-1	protein_coding	29880	ALG5	0.00342998	NA	11	1.22e-05	0.0247866	GTEx/v8/Brain_Caudate_basal_ganglia:GTEx/v8/Brain_Cortex	NA	9.77e-09	rs9576155	43
ENSG00000250299	MRPS31P4	13	53191693	53211581	1	pseudogene	100885866	MRPS31P4	NA	NA	38	8.21e-06	0.00011371	GTEx/v8/Brain_Cortex	NA	2.76e-11	rs1951722;rs2806985;rs9536383	44
ENSG00000225510	PCDH8P1	13	53774116	53776547	1	pseudogene	100133285	PCDH8P1	NA	NA	92	1.05e-06	0.00408458	GTEx/v8/Brain_Anterior_cingulate_cortex_BA24:GTEx/v8/Brain_Nucleus_accumbens_basal_ganglia	NA	2.76e-13	rs1951722;rs2806985;rs4525388;rs2491124;rs7332332;rs6561724;rs9536383	44
ENSG00000165379	LRFN5	14	42076773	42373752	1	protein_coding	145581	LRFN5	0.712325	0.122069	82	1.96e-20	5.33e-15	GTEx/v8/Brain_Cerebellar_Hemisphere:GTEx/v8/Brain_Cerebellum	NA	3.3e-10	rs8013655	45
ENSG00000270304	RP11-597G23.1	15	37546080	37547153	1	pseudogene	NA	NA	NA	NA	9	7.8e-06	0.00102403	GTEx/v8/Brain_Nucleus_accumbens_basal_ganglia	NA	1.5e-09	rs1520946;rs614443	46
ENSG00000261543	RP11-665J16.1	15	74445141	74471567	-1	antisense	NA	NA	NA	NA	33	3.83e-15	1.27e-10	GTEx/v8/Brain_Anterior_cingulate_cortex_BA24:GTEx/v8/Brain_Cortex:GTEx/v8/Brain_Frontal_Cortex_BA9	NA	2.87e-08	rs35917667;rs62004865	47
ENSG00000265566	RN7SL605P	17	2657126	2657430	1	misc_RNA	106481087	RN7SL605P	NA	NA	1	0.00010586	5.83e-09	GTEx/v8/Brain_Frontal_Cortex_BA9	NA	NA	rs2509805	39
ENSG00000172992	DCAKD	17	43100708	43138473	-1	protein_coding	79877	DCAKD	0.0293861	0.848595	21	1.43e-09	3.27e-18	GTEx/v8/Brain_Cerebellar_Hemisphere:GTEx/v8/Brain_Cerebellum:GTEx/v8/Brain_Cortex:GTEx/v8/Brain_Frontal_Cortex_BA9	NA	4.67e-10	rs60289499;rs4986172	50
ENSG00000136448	NMT1	17	43128978	43186384	1	protein_coding	4836	NMT1	0.998501	0.0324477	13	4.1e-06	2.39e-07	GTEx/v8/Brain_Cerebellum:GTEx/v8/Brain_Hypothalamus:GTEx/v8/Brain_Nucleus_accumbens_basal_ganglia	NA	8.35e-10	rs60289499;rs4986172	50
ENSG00000181513	ACBD4	17	43209967	43221548	1	protein_coding	79777	ACBD4	1.83e-05	-0.326407	6	1.6e-05	6.81e-14	GTEx/v8/Brain_Cerebellar_Hemisphere:GTEx/v8/Brain_Cerebellum:GTEx/v8/Brain_Hippocampus	NA	8.88e-09	rs60289499;rs4986172	50
ENSG00000186834	HEXIM1	17	43224684	43229468	1	protein_coding	10614	HEXIM1	0.9444	-1.49531	19	4.6e-07	0.00068807	GTEx/v8/Brain_Cortex:GTEx/v8/Brain_Frontal_Cortex_BA9:GTEx/v8/Brain_Putamen_basal_ganglia	NA	8.35e-10	rs4986172;rs60289499	50
ENSG00000267288	RP13-890H12.2	17	43246172	43248951	-1	antisense	105371795	LOC105371795	NA	NA	12	3.9e-06	0.00768329	GTEx/v8/Brain_Cerebellar_Hemisphere:GTEx/v8/Brain_Cerebellum:GTEx/v8/Brain_Cortex	NA	8.88e-09	rs60289499	50
ENSG00000184361	SPATA32	17	43331760	43339479	-1	protein_coding	124783	SPATA32	2.95e-05	-0.414756	3	0.00012133	0.044056	GTEx/v8/Brain_Cerebellum	NA	3.31e-09	rs60289499;rs4986172	50
ENSG00000232677	LINC00665	19	36803969	36822620	-1	lincRNA	100506930	LINC00665	NA	NA	181	1.75e-10	5.64e-18	GTEx/v8/Brain_Anterior_cingulate_cortex_BA24:GTEx/v8/Brain_Caudate_basal_ganglia:GTEx/v8/Brain_Cortex:GTEx/v8/Brain_Frontal_Cortex_BA9:GTEx/v8/Brain_Hippocampus:GTEx/v8/Brain_Hypothalamus:GTEx/v8/Brain_Nucleus_accumbens_basal_ganglia:GTEx/v8/Brain_Putamen_basal_ganglia:GTEx/v8/Brain_Substantia_nigra	NA	7.9e-09	rs528504	52
ENSG00000186017	ZNF566	19	36936021	36980804	-1	protein_coding	84924	ZNF566	0.637364	-0.59994	103	5.17e-06	0.00552337	GTEx/v8/Brain_Cerebellar_Hemisphere	NA	7.9e-09	rs528504	52
ENSG00000254004	ZNF260	19	37001597	37019562	-1	protein_coding	339324	ZNF260	3.07e-06	-0.371471	178	9.72e-07	1.34e-05	GTEx/v8/Brain_Caudate_basal_ganglia:GTEx/v8/Brain_Cerebellar_Hemisphere:GTEx/v8/Brain_Nucleus_accumbens_basal_ganglia	NA	7.9e-09	rs528504	52
ENSG00000267260	CTD-2162K18.4	19	37264055	37267980	1	protein_coding	NA	NA	NA	NA	182	2.21e-13	5.45e-14	GTEx/v8/Brain_Amygdala:GTEx/v8/Brain_Cerebellar_Hemisphere:GTEx/v8/Brain_Cerebellum:GTEx/v8/Brain_Cortex:GTEx/v8/Brain_Hippocampus:GTEx/v8/Brain_Hypothalamus:GTEx/v8/Brain_Putamen_basal_ganglia:GTEx/v8/Brain_Spinal_cord_cervical_c-1:GTEx/v8/Brain_Substantia_nigra	NA	7.9e-09	rs528504	52
ENSG00000267353	CTD-2162K18.3	19	37264614	37266810	-1	lincRNA	NA	NA	NA	NA	182	4.71e-08	0.00011145	GTEx/v8/Brain_Cerebellum	NA	7.9e-09	rs528504	52
ENSG00000267254	CTD-2162K18.5	19	37288420	37319017	1	antisense	284408	ZNF790-AS1	NA	NA	37	3.16e-06	0.00556778	GTEx/v8/Brain_Cerebellum:GTEx/v8/Brain_Cortex	NA	1.28e-05	rs528504	52
ENSG00000197863	ZNF790	19	37308330	37341689	-1	protein_coding	388536	ZNF790	3.28e-12	-0.593222	1	0.00018623	0.0398186	GTEx/v8/Brain_Cerebellum	NA	0.001272	rs528504	52
ENSG00000251247	ZNF345	19	37341263	37403931	1	protein_coding	25850	ZNF345	2.33e-11	-0.704688	6	3.08e-06	0.00459914	GTEx/v8/Brain_Cerebellar_Hemisphere	NA	0.0003927	rs528504	52
ENSG00000245680	ZNF585B	19	37672481	37709055	-1	protein_coding	92285	ZNF585B	0.00569167	-0.572054	28	1.38e-05	2.13e-08	GTEx/v8/Brain_Cerebellar_Hemisphere:GTEx/v8/Brain_Cerebellum	NA	4.21e-05	rs528504	52
ENSG00000226686	AC012309.5	19	37742814	37756437	1	lincRNA	101927667	LINC01535	NA	NA	182	1.2e-55	4.9e-50	GTEx/v8/Brain_Amygdala:GTEx/v8/Brain_Anterior_cingulate_cortex_BA24:GTEx/v8/Brain_Caudate_basal_ganglia:GTEx/v8/Brain_Cerebellar_Hemisphere:GTEx/v8/Brain_Cerebellum:GTEx/v8/Brain_Cortex:GTEx/v8/Brain_Frontal_Cortex_BA9:GTEx/v8/Brain_Hippocampus:GTEx/v8/Brain_Hypothalamus:GTEx/v8/Brain_Nucleus_accumbens_basal_ganglia:GTEx/v8/Brain_Putamen_basal_ganglia:GTEx/v8/Brain_Spinal_cord_cervical_c-1:GTEx/v…	NA	7.9e-09	rs528504	52
ENSG00000267605	CTD-3220F14.1	19	37756841	37762420	-1	lincRNA	NA	NA	NA	NA	21	7.59e-07	6.96e-05	GTEx/v8/Brain_Cerebellum	NA	5.23e-06	rs528504	52
ENSG00000266916	CTD-3064H18.1	19	37988063	37997948	-1	antisense	NA	NA	NA	NA	66	7.12e-06	0.00832666	GTEx/v8/Brain_Cerebellum	NA	5.23e-06	rs528504	52
ENSG00000180479	ZNF571	19	38045684	38085673	-1	protein_coding	51276	ZNF571	2.83e-09	-0.734602	6	1.75e-05	5.52e-06	GTEx/v8/Brain_Cerebellum	NA	0.0002015	rs528504	52
ENSG00000196381	ZNF781	19	38158652	38183223	-1	protein_coding	163115	ZNF781	7.22e-06	-0.263307	176	6.24e-10	1.9e-14	GTEx/v8/Brain_Anterior_cingulate_cortex_BA24:GTEx/v8/Brain_Cerebellar_Hemisphere:GTEx/v8/Brain_Cerebellum:GTEx/v8/Brain_Cortex:GTEx/v8/Brain_Frontal_Cortex_BA9:GTEx/v8/Brain_Hippocampus:GTEx/v8/Brain_Hypothalamus:GTEx/v8/Brain_Nucleus_accumbens_basal_ganglia:GTEx/v8/Brain_Spinal_cord_cervical_c-1	NA	7.9e-09	rs528504	52
ENSG00000267422	CTD-2554C21.1	19	38270326	38283505	1	pseudogene	NA	NA	NA	NA	9	9.38e-07	8.59e-07	GTEx/v8/Brain_Caudate_basal_ganglia:GTEx/v8/Brain_Frontal_Cortex_BA9:GTEx/v8/Brain_Substantia_nigra	NA	4.21e-05	rs528504	52
ENSG00000215447	BX322557.10	21	46707967	46711653	1	processed_transcript	NA	NA	NA	NA	1	2.48e-05	1.88e-30	GTEx/v8/Brain_Cortex	NA	1.51e-07	rs2838788	54
ENSG00000223768	LINC00205	21	46713200	46717269	1	lincRNA	642852	LINC00205	NA	NA	4	7.59e-07	1.73e-29	GTEx/v8/Brain_Hippocampus	NA	1.22e-09	rs2838788	54

## Sheet: Table S10
Supplementary Table S10. Gene set analysis results from positional mapping
Category	GeneSet	N_genes	N_overlap	p	adjP	genes	link
GO_bp	GO_SENSORY_PERCEPTION_OF_SMELL	448	27	3.14e-13	2.31e-09	OR4B1:OR4X2:OR4X1:OR4S1:OR4C3:OR4C5:OR4A47:OR2B2:OR2W6P:OR2B6:OR2B8P:OR1F12:OR2W1:OR2B3:OR2J1:OR2J3:OR2J2:OR14J1:OR5V1:OR12D3:OR12D2:OR12D1:OR11A1:OR10C1:OR2H1:OR2I1P:OR2H2	http://www.gsea-msigdb.org/gsea/msigdb/cards/GO_SENSORY_PERCEPTION_OF_SMELL
GO_bp	GO_SENSORY_PERCEPTION_OF_CHEMICAL_STIMULUS	519	28	1.64e-12	4.84e-09	OR4B1:OR4X2:OR4X1:OR4S1:OR4C3:OR4C5:OR4A47:GNAT1:OR2B2:OR2W6P:OR2B6:OR2B8P:OR1F12:OR2W1:OR2B3:OR2J1:OR2J3:OR2J2:OR14J1:OR5V1:OR12D3:OR12D2:OR12D1:OR11A1:OR10C1:OR2H1:OR2I1P:OR2H2	http://www.gsea-msigdb.org/gsea/msigdb/cards/GO_SENSORY_PERCEPTION_OF_CHEMICAL_STIMULUS
GO_bp	GO_DETECTION_OF_STIMULUS_INVOLVED_IN_SENSORY_PERCEPTION	523	28	1.97e-12	4.84e-09	OR4B1:OR4X2:OR4X1:OR4S1:OR4C3:OR4C5:OR4A47:GNAT1:OR2B2:OR2W6P:OR2B6:OR2B8P:OR1F12:OR2W1:OR2B3:OR2J1:OR2J3:OR2J2:OR14J1:OR5V1:OR12D3:OR12D2:OR12D1:OR11A1:OR10C1:OR2H1:OR2I1P:OR2H2	http://www.gsea-msigdb.org/gsea/msigdb/cards/GO_DETECTION_OF_STIMULUS_INVOLVED_IN_SENSORY_PERCEPTION
GO_bp	GO_DETECTION_OF_STIMULUS	682	29	1.97e-10	3.62e-07	OR4B1:OR4X2:OR4X1:OR4S1:OR4C3:OR4C5:OR4A47:GNAT1:OR2B2:OR2W6P:OR2B6:OR2B8P:OR1F12:OR2W1:OR2B3:OR2J1:OR2J3:OR2J2:OR14J1:OR5V1:OR12D3:OR12D2:OR12D1:OR11A1:OR10C1:OR2H1:OR2I1P:OR2H2:TLR4	http://www.gsea-msigdb.org/gsea/msigdb/cards/GO_DETECTION_OF_STIMULUS
GO_bp	GO_NERVOUS_SYSTEM_PROCESS	1409	38	9.31e-08	0.00013005	OR4B1:OR4X2:OR4X1:OR4S1:OR4C3:OR4C5:OR4A47:STRA6:MAPT:ZMYND8:ADARB1:LAMB2:GPX1:DAG1:GNAT1:MEF2C:OR2B2:OR2W6P:OR2B6:OR2B8P:OR1F12:OR2W1:OR2B3:OR2J1:OR2J3:OR2J2:OR14J1:OR5V1:OR12D3:OR12D2:OR12D1:OR11A1:OR10C1:OR2H1:OR2I1P:OR2H2:GPER1:FOXP2	http://www.gsea-msigdb.org/gsea/msigdb/cards/GO_NERVOUS_SYSTEM_PROCESS
GO_bp	GO_SENSORY_PERCEPTION	960	30	1.06e-07	0.00013005	OR4B1:OR4X2:OR4X1:OR4S1:OR4C3:OR4C5:OR4A47:LAMB2:GPX1:GNAT1:OR2B2:OR2W6P:OR2B6:OR2B8P:OR1F12:OR2W1:OR2B3:OR2J1:OR2J3:OR2J2:OR14J1:OR5V1:OR12D3:OR12D2:OR12D1:OR11A1:OR10C1:OR2H1:OR2I1P:OR2H2	http://www.gsea-msigdb.org/gsea/msigdb/cards/GO_SENSORY_PERCEPTION
GO_bp	GO_CHROMATIN_SILENCING_AT_RDNA	40	7	1.7e-07	0.000178	HIST1H3H:HIST1H4J:HIST1H4K:HIST1H3I:HIST1H4L:HIST1H3J:PHF2	http://www.gsea-msigdb.org/gsea/msigdb/cards/GO_CHROMATIN_SILENCING_AT_RDNA
GO_bp	GO_CHROMATIN_ASSEMBLY	157	11	8.36e-07	0.00070488	HIST1H2BL:HIST1H3H:HIST1H2BM:HIST1H4J:HIST1H4K:HIST1H2BN:HIST1H1B:HIST1H3I:HIST1H4L:HIST1H3J:HIST1H2BO	http://www.gsea-msigdb.org/gsea/msigdb/cards/GO_CHROMATIN_ASSEMBLY
GO_bp	GO_DNA_REPLICATION_DEPENDENT_NUCLEOSOME_ORGANIZATION	32	6	8.63e-07	0.00070488	HIST1H3H:HIST1H4J:HIST1H4K:HIST1H3I:HIST1H4L:HIST1H3J	http://www.gsea-msigdb.org/gsea/msigdb/cards/GO_DNA_REPLICATION_DEPENDENT_NUCLEOSOME_ORGANIZATION
GO_bp	GO_DNA_PACKAGING	200	12	1.38e-06	0.00101652	HIST1H2BL:HIST1H3H:HIST1H2BM:HIST1H4J:HIST1H4K:HIST1H2BN:HIST1H1B:HIST1H3I:HIST1H4L:HIST1H3J:HIST1H2BO:GPER1	http://www.gsea-msigdb.org/gsea/msigdb/cards/GO_DNA_PACKAGING
GO_bp	GO_NEGATIVE_REGULATION_OF_GENE_EXPRESSION_EPIGENETIC	135	10	1.59e-06	0.00106489	SPI1:HIST1H3H:HIST1H4J:HIST1H4K:HIST1H1B:HIST1H3I:HIST1H4L:HIST1H3J:TRIM27:PHF2	http://www.gsea-msigdb.org/gsea/msigdb/cards/GO_NEGATIVE_REGULATION_OF_GENE_EXPRESSION_EPIGENETIC
GO_bp	GO_NUCLEOSOME_ORGANIZATION	173	11	2.17e-06	0.00132875	HIST1H2BL:HIST1H3H:HIST1H2BM:HIST1H4J:HIST1H4K:HIST1H2BN:HIST1H1B:HIST1H3I:HIST1H4L:HIST1H3J:HIST1H2BO	http://www.gsea-msigdb.org/gsea/msigdb/cards/GO_NUCLEOSOME_ORGANIZATION
GO_bp	GO_CHROMATIN_ASSEMBLY_OR_DISASSEMBLY	183	11	3.74e-06	0.00211379	HIST1H2BL:HIST1H3H:HIST1H2BM:HIST1H4J:HIST1H4K:HIST1H2BN:HIST1H1B:HIST1H3I:HIST1H4L:HIST1H3J:HIST1H2BO	http://www.gsea-msigdb.org/gsea/msigdb/cards/GO_CHROMATIN_ASSEMBLY_OR_DISASSEMBLY
GO_bp	GO_MEGAKARYOCYTE_DIFFERENTIATION	93	8	5.87e-06	0.00306398	MEIS1:MEF2C:HIST1H3H:HIST1H4J:HIST1H4K:HIST1H3I:HIST1H4L:HIST1H3J	http://www.gsea-msigdb.org/gsea/msigdb/cards/GO_MEGAKARYOCYTE_DIFFERENTIATION
GO_bp	GO_PROTEIN_DNA_COMPLEX_SUBUNIT_ORGANIZATION	272	13	6.25e-06	0.00306398	PSMC3:TCF4:HIST1H2BL:HIST1H3H:HIST1H2BM:HIST1H4J:HIST1H4K:HIST1H2BN:HIST1H1B:HIST1H3I:HIST1H4L:HIST1H3J:HIST1H2BO	http://www.gsea-msigdb.org/gsea/msigdb/cards/GO_PROTEIN_DNA_COMPLEX_SUBUNIT_ORGANIZATION
GO_bp	GO_REGULATION_OF_MYELOID_CELL_DIFFERENTIATION	247	12	1.2e-05	0.00553124	SPI1:MEIS1:P4HTM:TCTA:MEF2C:HIST1H3H:HIST1H4J:HIST1H4K:HIST1H3I:HIST1H4L:HIST1H3J:TLR4	http://www.gsea-msigdb.org/gsea/msigdb/cards/GO_REGULATION_OF_MYELOID_CELL_DIFFERENTIATION
GO_bp	GO_DNA_CONFORMATION_CHANGE	295	13	1.49e-05	0.00642324	HIST1H2BL:HIST1H3H:HIST1H2BM:HIST1H4J:HIST1H4K:HIST1H2BN:HIST1H1B:HIST1H3I:HIST1H4L:HIST1H3J:HIST1H2BO:ASCC3:GPER1	http://www.gsea-msigdb.org/gsea/msigdb/cards/GO_DNA_CONFORMATION_CHANGE
GO_bp	GO_REGULATION_OF_MEGAKARYOCYTE_DIFFERENTIATION	78	7	1.71e-05	0.00670544	MEF2C:HIST1H3H:HIST1H4J:HIST1H4K:HIST1H3I:HIST1H4L:HIST1H3J	http://www.gsea-msigdb.org/gsea/msigdb/cards/GO_REGULATION_OF_MEGAKARYOCYTE_DIFFERENTIATION
GO_bp	GO_G_PROTEIN_COUPLED_RECEPTOR_SIGNALING_PATHWAY	1363	32	1.73e-05	0.00670544	OR4B1:OR4X2:OR4X1:OR4S1:OR4C3:OR4C5:OR4A47:RHOA:GNAT1:OR2B2:OR2W6P:OR2B6:OR2B8P:OR1F12:OR2W1:OR2B3:OR2J1:OR2J3:OR2J2:OR14J1:OR5V1:OR12D3:OR12D2:OR12D1:OR11A1:OR10C1:OR2H1:OR2I1P:GABBR1:OR2H2:GPR146:GPER1	http://www.gsea-msigdb.org/gsea/msigdb/cards/GO_G_PROTEIN_COUPLED_RECEPTOR_SIGNALING_PATHWAY
GO_bp	GO_PROTEIN_HETEROTETRAMERIZATION	54	6	2.03e-05	0.00746034	HIST1H3H:HIST1H4J:HIST1H4K:HIST1H3I:HIST1H4L:HIST1H3J	http://www.gsea-msigdb.org/gsea/msigdb/cards/GO_PROTEIN_HETEROTETRAMERIZATION
GO_bp	GO_REGULATION_OF_GENE_SILENCING	151	9	3.05e-05	0.0106865	NUP160:HIST1H3H:HIST1H4J:HIST1H4K:HIST1H1B:HIST1H3I:HIST1H4L:HIST1H3J:PHF2	http://www.gsea-msigdb.org/gsea/msigdb/cards/GO_REGULATION_OF_GENE_SILENCING
GO_bp	GO_CHROMATIN_ORGANIZATION_INVOLVED_IN_REGULATION_OF_TRANSCRIPTION	127	8	5.7e-05	0.0190389	HIST1H3H:HIST1H4J:HIST1H4K:HIST1H1B:HIST1H3I:HIST1H4L:HIST1H3J:PHF2	http://www.gsea-msigdb.org/gsea/msigdb/cards/GO_CHROMATIN_ORGANIZATION_INVOLVED_IN_REGULATION_OF_TRANSCRIPTION
GO_bp	GO_SYNAPSE_ORGANIZATION	402	14	9.2e-05	0.0293918	INA:RAPSN:LRFN5:MAPT:ZMYND8:LAMB2:RHOA:DAG1:BSN:AMIGO3:CAMKV:SEMA3F:MEF2C:PCLO	http://www.gsea-msigdb.org/gsea/msigdb/cards/GO_SYNAPSE_ORGANIZATION
GO_bp	GO_CELLULAR_PROTEIN_CONTAINING_COMPLEX_ASSEMBLY	1100	26	9.72e-05	0.029773	LMOD1:MYBPC3:PSMC3:CELF1:NDUFS3:CLP1:MAPT:TCF4:USP4:RHOA:RBM5:ABT1:HIST1H2BL:HIST1H3H:HIST1H2BM:HIST1H4J:HIST1H4K:HIST1H2BN:HIST1H1B:HIST1H3I:HIST1H4L:HIST1H3J:HIST1H2BO:TRIM27:COX19:TLR4	http://www.gsea-msigdb.org/gsea/msigdb/cards/GO_CELLULAR_PROTEIN_CONTAINING_COMPLEX_ASSEMBLY
GO_bp	GO_REGULATION_OF_HEMOPOIESIS	460	15	0.00010803	0.0317603	SPI1:PSMC3:MEIS1:P4HTM:RHOA:TCTA:MEF2C:BTN2A2:HIST1H3H:HIST1H4J:HIST1H4K:HIST1H3I:HIST1H4L:HIST1H3J:TLR4	http://www.gsea-msigdb.org/gsea/msigdb/cards/GO_REGULATION_OF_HEMOPOIESIS
GO_bp	GO_T_CELL_RECEPTOR_SIGNALING_PATHWAY	183	9	0.00013466	0.0380658	PSMC3:PTPRJ:BTN3A2:BTN2A2:BTN3A1:BTN2A3P:BTN3A3:BTN2A1:BTN1A1	http://www.gsea-msigdb.org/gsea/msigdb/cards/GO_T_CELL_RECEPTOR_SIGNALING_PATHWAY
Chemical_and_Genetic_pertubation	NIKOLSKY_BREAST_CANCER_19Q13.1_AMPLICON	22	8	3.5e-11	1.16e-07	ZNF345:ZNF829:ZNF568:ZNF420:ZNF585A:ZNF585B:ZNF383:HKR1	http://www.gsea-msigdb.org/gsea/msigdb/cards/NIKOLSKY_BREAST_CANCER_19Q13.1_AMPLICON
Chemical_and_Genetic_pertubation	NIKOLSKY_BREAST_CANCER_7P22_AMPLICON	38	7	1.17e-07	0.00019286	COX19:CYP2W1:C7orf50:GPR146:GPER1:ZFAND2A:MAD1L1	http://www.gsea-msigdb.org/gsea/msigdb/cards/NIKOLSKY_BREAST_CANCER_7P22_AMPLICON
Chemical_and_Genetic_pertubation	ACEVEDO_LIVER_CANCER_WITH_H3K9ME3_DN	117	10	4.26e-07	0.00046847	HMGN4:HIST1H2AI:HIST1H2AJ:HIST1H4J:HIST1H4K:HIST1H2AK:HIST1H2BN:HIST1H2AL:HIST1H4L:HIST1H2AM	http://www.gsea-msigdb.org/gsea/msigdb/cards/ACEVEDO_LIVER_CANCER_WITH_H3K9ME3_DN
Chemical_and_Genetic_pertubation	ACEVEDO_LIVER_CANCER_WITH_H3K27ME3_DN	215	11	1.72e-05	0.0141845	SHISA4:RBFOX1:HIST1H2AI:HIST1H2AJ:HIST1H4J:HIST1H4K:HIST1H2AK:HIST1H2AL:HIST1H4L:HIST1H2AM:HIST1H2BO	http://www.gsea-msigdb.org/gsea/msigdb/cards/ACEVEDO_LIVER_CANCER_WITH_H3K27ME3_DN
Chemical_and_Genetic_pertubation	HASLINGER_B_CLL_WITH_6Q21_DELETION	20	4	4.84e-05	0.0319632	HIST1H2BM:HIST1H2AK:HIST1H2AL:HIST1H2BO	http://www.gsea-msigdb.org/gsea/msigdb/cards/HASLINGER_B_CLL_WITH_6Q21_DELETION
GO_cc	GO_DNA_PACKAGING_COMPLEX	113	15	9.38e-13	9.39e-10	HIST1H2BL:HIST1H2AI:HIST1H3H:HIST1H2BM:HIST1H4J:HIST1H4K:HIST1H2AK:HIST1H2BN:HIST1H2AL:HIST1H1B:HIST1H3I:HIST1H4L:HIST1H3J:HIST1H2AM:HIST1H2BO	http://www.gsea-msigdb.org/gsea/msigdb/cards/GO_DNA_PACKAGING_COMPLEX
GO_cc	GO_PROTEIN_DNA_COMPLEX	199	15	3.14e-09	1.57e-06	HIST1H2BL:HIST1H2AI:HIST1H3H:HIST1H2BM:HIST1H4J:HIST1H4K:HIST1H2AK:HIST1H2BN:HIST1H2AL:HIST1H1B:HIST1H3I:HIST1H4L:HIST1H3J:HIST1H2AM:HIST1H2BO	http://www.gsea-msigdb.org/gsea/msigdb/cards/GO_PROTEIN_DNA_COMPLEX
GO_cc	GO_NUCLEAR_NUCLEOSOME	38	6	2.5e-06	0.00083252	HIST1H3H:HIST1H4J:HIST1H4K:HIST1H3I:HIST1H4L:HIST1H3J	http://www.gsea-msigdb.org/gsea/msigdb/cards/GO_NUCLEAR_NUCLEOSOME
GO_cc	GO_CHROMATIN	554	19	6.64e-06	0.00166111	SPI1:TCF4:MEF2C:HMGN4:HIST1H2BL:HIST1H2AI:HIST1H3H:HIST1H2BM:HIST1H4J:HIST1H4K:HIST1H2AK:HIST1H2BN:HIST1H2AL:HIST1H1B:HIST1H3I:HIST1H4L:HIST1H3J:HIST1H2AM:HIST1H2BO	http://www.gsea-msigdb.org/gsea/msigdb/cards/GO_CHROMATIN
GO_cc	GO_NUCLEAR_CHROMATIN	368	14	3.58e-05	0.0071672	SPI1:TCF4:MEF2C:HIST1H2AI:HIST1H3H:HIST1H4J:HIST1H4K:HIST1H2AK:HIST1H2AL:HIST1H1B:HIST1H3I:HIST1H4L:HIST1H3J:HIST1H2AM	http://www.gsea-msigdb.org/gsea/msigdb/cards/GO_NUCLEAR_CHROMATIN
Positional_gene_sets	chr6p22	263	107	3.7e-145	1.11e-142	BTN3A2:BTN2A2:BTN3A1:BTN2A3P:BTN3A3:BTN2A1:BTN1A1:RNU6-502P:HCG11:HMGN4:ABT1:ZNF322:GUSBP2:RSL24D1P1:HIST1H4PS1:HIST1H2BL:HIST1H2AI:HIST1H3H:HIST1H2AJ:HIST1H2BM:HIST1H4J:HIST1H4K:HIST1H2AK:HIST1H2BN:HIST1H2BPS2:HIST1H2AL:HIST1H1B:HIST1H3I:HIST1H4L:HIST1H3J:HIST1H2AM:HIST1H2BO:RNU7-26P:OR2B2:OR2W6P:OR2B6:RPLP2P1:OR2W4P:IQCB2P:OR2W2P:OR2B7P:OR2B8P:OR1F12:RP1-313I6.12:ZNF165:ZSCAN12P1:ZSCAN16-AS1:ZS…	http://www.gsea-msigdb.org/gsea/msigdb/cards/chr6p22
Positional_gene_sets	chr11p11	115	47	6.36e-63	9.51e-61	MYBPC3:SPI1:MIR4487:SLC39A13:PSMC3:RAPSN:CELF1:RN7SL652P:NDUFS3:PTPMT1:KBTBD4:KBTBD4:MTCH2:AGBL2:FNBP4:NUP160:RNA5SP340:PTPRJ:OR4B1:OR4B2P:OR4X2:OR4X1:OR4S1:OR4C3:OR4C4P:OR4C5:OR4C2P:OR4C10P:OR4C9P:OR4R1P:OR4A47:OR4A48P:OR4A46P:OR4A40P:OR4A43P:OR4A45P:OR4A41P:OR4A42P:OR4A44P:TRIM51CP:TRIM51GP:TRIM53CP:TRIM49B:TRIM64C:UBTFL7:FOLH1:TYRL:CBX3P8	http://www.gsea-msigdb.org/gsea/msigdb/cards/chr11p11
Positional_gene_sets	chr3p21	277	57	1e-56	9.97e-55	NCKIPSD:IP6K2:PRKAR2A:PRKAR2A-AS1:SLC25A20:ARIH2OS:ARIH2:P4HTM:WDR6:DALRD3:IMPDH2:QRICH1:RN7SL182P:QARS:USP19:LAMB2:CCDC71:KLHDC8B:C3orf84:CCDC36:C3orf62:MIR4271:USP4:GPX1:RHOA:RHOA-IT1:TCTA:AMT:NICN1:RNA5SP130:DAG1:BSN-AS2:BSN:BSN-AS1:APEH:MST1:RNF123:AMIGO3:GMPPB:IP6K1:COX6CP14:CDHR4:FAM212A:UBA7:MIR5193:TRAIP:CAMKV:RN7SL217P:ACTBP13:MST1R:MON1A:RBM6:RBM5:RP11-493K19.3:SEMA3F:GNAT1:SLC38A3	http://www.gsea-msigdb.org/gsea/msigdb/cards/chr3p21
Positional_gene_sets	chr10q24	166	19	1.35e-14	1.01e-12	RP11-18I14.10:C10orf95:TMEM180:ACTR1A:SUFU:RNU6-43P:WBP1L:RNU6-1231P:CYP17A1:PFN1P11:PTGES3P4:C10orf32:C10orf32-ASMT:AS3MT:CNNM2:NT5C2:MARCKSL1P1:INA:PCGF6	http://www.gsea-msigdb.org/gsea/msigdb/cards/chr10q24
Positional_gene_sets	chr7p22	100	8	1.01e-05	0.00060274	COX19:CYP2W1:C7orf50:MIR339:GPR146:GPER1:ZFAND2A:MAD1L1	http://www.gsea-msigdb.org/gsea/msigdb/cards/chr7p22
Positional_gene_sets	chr8q23	34	5	2.54e-05	0.00126566	OXR1:TAGLN2P1:RNU7-84P:ABRA:CSMD3	http://www.gsea-msigdb.org/gsea/msigdb/cards/chr8q23
Positional_gene_sets	chr11q12	309	12	0.00010565	0.00451266	MIR130A:YPEL4:CLP1:ZDHHC5:MED19:TMX2:TMX2-CTNND1:C11orf31:BTBD18:CTNND1:OR5BA1P:OR5AZ1P	http://www.gsea-msigdb.org/gsea/msigdb/cards/chr11q12
Positional_gene_sets	chr5q14	106	7	0.0001234	0.00461206	TMEM161B:TMEM161B-AS1:RPS3AP22:CTC-498M16.2:LINC00461:CTC-467M3.1:MEF2C	http://www.gsea-msigdb.org/gsea/msigdb/cards/chr5q14
Positional_gene_sets	chr15q24	103	6	0.00073465	0.0244068	TBC1D21:LOXL1-AS1:LOXL1:ISLR:STRA6:CCDC33	http://www.gsea-msigdb.org/gsea/msigdb/cards/chr15q24
Positional_gene_sets	chr6q16	46	4	0.00131837	0.0394194	SIM1:ASCC3:LINC00577:LIN28B	http://www.gsea-msigdb.org/gsea/msigdb/cards/chr6q16
Wikipathways	GPCRs, Class A Rhodopsin-like	257	13	3.38e-06	0.0018343	OR2B2:OR2B6:OR2W1:OR2B3:OR2J3:OR2J2:OR14J1:OR5V1:OR12D3:OR11A1:OR2H1:OR2H2:GPER1	http://www.wikipathways.org/instance/WP455_r106426
Wikipathways	Histone Modifications	68	6	7.62e-05	0.0206776	HIST1H3H:HIST1H4J:HIST1H4K:HIST1H3I:HIST1H4L:HIST1H3J	http://www.wikipathways.org/instance/WP2369_r106592
GO_mf	GO_OLFACTORY_RECEPTOR_ACTIVITY	421	27	7.16e-14	1.18e-10	OR4B1:OR4X2:OR4X1:OR4S1:OR4C3:OR4C5:OR4A47:OR2B2:OR2W6P:OR2B6:OR2B8P:OR1F12:OR2W1:OR2B3:OR2J1:OR2J3:OR2J2:OR14J1:OR5V1:OR12D3:OR12D2:OR12D1:OR11A1:OR10C1:OR2H1:OR2I1P:OR2H2	http://www.gsea-msigdb.org/gsea/msigdb/cards/GO_OLFACTORY_RECEPTOR_ACTIVITY
GO_mf	GO_G_PROTEIN_COUPLED_RECEPTOR_ACTIVITY	857	30	8.76e-09	7.21e-06	OR4B1:OR4X2:OR4X1:OR4S1:OR4C3:OR4C5:OR4A47:OR2B2:OR2W6P:OR2B6:OR2B8P:OR1F12:OR2W1:OR2B3:OR2J1:OR2J3:OR2J2:OR14J1:OR5V1:OR12D3:OR12D2:OR12D1:OR11A1:OR10C1:OR2H1:OR2I1P:GABBR1:OR2H2:GPR146:GPER1	http://www.gsea-msigdb.org/gsea/msigdb/cards/GO_G_PROTEIN_COUPLED_RECEPTOR_ACTIVITY
GO_mf	GO_PROTEIN_HETERODIMERIZATION_ACTIVITY	501	20	3.73e-07	0.00020455	TCF4:MEIS1:MEF2C:HIST1H2BL:HIST1H2AI:HIST1H3H:HIST1H2BM:HIST1H4J:HIST1H4K:HIST1H2AK:HIST1H2BN:HIST1H2AL:HIST1H3I:HIST1H4L:HIST1H3J:HIST1H2AM:HIST1H2BO:SIM1:FOXP2:TLR4	http://www.gsea-msigdb.org/gsea/msigdb/cards/GO_PROTEIN_HETERODIMERIZATION_ACTIVITY
GO_mf	GO_TRANSMEMBRANE_SIGNALING_RECEPTOR_ACTIVITY	1253	32	3.19e-06	0.00131324	OR4B1:OR4X2:OR4X1:OR4S1:OR4C3:OR4C5:OR4A47:MST1R:OR2B2:OR2W6P:OR2B6:OR2B8P:OR1F12:OR2W1:OR2B3:OR2J1:OR2J3:OR2J2:OR14J1:OR5V1:OR12D3:OR12D2:OR12D1:OR11A1:OR10C1:OR2H1:OR2I1P:GABBR1:OR2H2:GPR146:GPER1:TLR4	http://www.gsea-msigdb.org/gsea/msigdb/cards/GO_TRANSMEMBRANE_SIGNALING_RECEPTOR_ACTIVITY
GO_mf	GO_MOLECULAR_TRANSDUCER_ACTIVITY	1518	34	2.45e-05	0.00807598	OR4B1:OR4X2:OR4X1:OR4S1:OR4C3:OR4C5:OR4A47:STRA6:MST1R:BTN1A1:OR2B2:OR2W6P:OR2B6:OR2B8P:OR1F12:OR2W1:OR2B3:OR2J1:OR2J3:OR2J2:OR14J1:OR5V1:OR12D3:OR12D2:OR12D1:OR11A1:OR10C1:OR2H1:OR2I1P:GABBR1:OR2H2:GPR146:GPER1:TLR4	http://www.gsea-msigdb.org/gsea/msigdb/cards/GO_MOLECULAR_TRANSDUCER_ACTIVITY
Curated_gene_sets	REACTOME_HDACS_DEACETYLATE_HISTONES	91	15	3.49e-14	1.92e-10	HIST1H2BL:HIST1H2AI:HIST1H3H:HIST1H2AJ:HIST1H2BM:HIST1H4J:HIST1H4K:HIST1H2AK:HIST1H2BN:HIST1H2AL:HIST1H3I:HIST1H4L:HIST1H3J:HIST1H2AM:HIST1H2BO	http://www.gsea-msigdb.org/gsea/msigdb/cards/REACTOME_HDACS_DEACETYLATE_HISTONES
Curated_gene_sets	REACTOME_HATS_ACETYLATE_HISTONES	138	16	1.38e-12	3.72e-09	SUPT20H:HIST1H2BL:HIST1H2AI:HIST1H3H:HIST1H2AJ:HIST1H2BM:HIST1H4J:HIST1H4K:HIST1H2AK:HIST1H2BN:HIST1H2AL:HIST1H3I:HIST1H4L:HIST1H3J:HIST1H2AM:HIST1H2BO	http://www.gsea-msigdb.org/gsea/msigdb/cards/REACTOME_HATS_ACETYLATE_HISTONES
Curated_gene_sets	KEGG_SYSTEMIC_LUPUS_ERYTHEMATOSUS	119	15	2.03e-12	3.72e-09	HIST1H2BL:HIST1H2AI:HIST1H3H:HIST1H2AJ:HIST1H2BM:HIST1H4J:HIST1H4K:HIST1H2AK:HIST1H2BN:HIST1H2AL:HIST1H3I:HIST1H4L:HIST1H3J:HIST1H2AM:HIST1H2BO	http://www.gsea-msigdb.org/gsea/msigdb/cards/KEGG_SYSTEMIC_LUPUS_ERYTHEMATOSUS
Curated_gene_sets	NIKOLSKY_BREAST_CANCER_19Q13.1_AMPLICON	22	8	3.5e-11	4.49e-08	ZNF345:ZNF829:ZNF568:ZNF420:ZNF585A:ZNF585B:ZNF383:HKR1	http://www.gsea-msigdb.org/gsea/msigdb/cards/NIKOLSKY_BREAST_CANCER_19Q13.1_AMPLICON
Curated_gene_sets	REACTOME_DNA_METHYLATION	62	11	4.08e-11	4.49e-08	HIST1H2BL:HIST1H3H:HIST1H2AJ:HIST1H2BM:HIST1H4J:HIST1H4K:HIST1H2BN:HIST1H3I:HIST1H4L:HIST1H3J:HIST1H2BO	http://www.gsea-msigdb.org/gsea/msigdb/cards/REACTOME_DNA_METHYLATION
Curated_gene_sets	REACTOME_ACTIVATED_PKN1_STIMULATES_TRANSCRIPTION_OF_AR_ANDROGEN_RECEPTOR_REGULATED_GENES_KLK2_AND_KLK3	64	11	5.86e-11	5.37e-08	HIST1H2BL:HIST1H3H:HIST1H2AJ:HIST1H2BM:HIST1H4J:HIST1H4K:HIST1H2BN:HIST1H3I:HIST1H4L:HIST1H3J:HIST1H2BO	http://www.gsea-msigdb.org/gsea/msigdb/cards/REACTOME_ACTIVATED_PKN1_STIMULATES_TRANSCRIPTION_OF_AR_ANDROGEN_RECEPTOR_REGULATED_GENES_KLK2_AND_KLK3
Curated_gene_sets	REACTOME_SIRT1_NEGATIVELY_REGULATES_RRNA_EXPRESSION	65	11	6.99e-11	5.49e-08	HIST1H2BL:HIST1H3H:HIST1H2AJ:HIST1H2BM:HIST1H4J:HIST1H4K:HIST1H2BN:HIST1H3I:HIST1H4L:HIST1H3J:HIST1H2BO	http://www.gsea-msigdb.org/gsea/msigdb/cards/REACTOME_SIRT1_NEGATIVELY_REGULATES_RRNA_EXPRESSION
Curated_gene_sets	REACTOME_TRANSCRIPTIONAL_REGULATION_OF_GRANULOPOIESIS	87	12	1.14e-10	7.87e-08	SPI1:HIST1H2BL:HIST1H3H:HIST1H2AJ:HIST1H2BM:HIST1H4J:HIST1H4K:HIST1H2BN:HIST1H3I:HIST1H4L:HIST1H3J:HIST1H2BO	http://www.gsea-msigdb.org/gsea/msigdb/cards/REACTOME_TRANSCRIPTIONAL_REGULATION_OF_GRANULOPOIESIS
Curated_gene_sets	REACTOME_FORMATION_OF_THE_BETA_CATENIN:TCF_TRANSACTIVATING_COMPLEX	89	12	1.5e-10	8.87e-08	TCF4:HIST1H2BL:HIST1H3H:HIST1H2AJ:HIST1H2BM:HIST1H4J:HIST1H4K:HIST1H2BN:HIST1H3I:HIST1H4L:HIST1H3J:HIST1H2BO	http://www.gsea-msigdb.org/gsea/msigdb/cards/REACTOME_FORMATION_OF_THE_BETA_CATENIN:TCF_TRANSACTIVATING_COMPLEX
Curated_gene_sets	REACTOME_PRC2_METHYLATES_HISTONES_AND_DNA	70	11	1.61e-10	8.87e-08	HIST1H2BL:HIST1H3H:HIST1H2AJ:HIST1H2BM:HIST1H4J:HIST1H4K:HIST1H2BN:HIST1H3I:HIST1H4L:HIST1H3J:HIST1H2BO	http://www.gsea-msigdb.org/gsea/msigdb/cards/REACTOME_PRC2_METHYLATES_HISTONES_AND_DNA
Curated_gene_sets	REACTOME_CONDENSATION_OF_PROPHASE_CHROMOSOMES	71	11	1.89e-10	8.99e-08	HIST1H2BL:HIST1H3H:HIST1H2AJ:HIST1H2BM:HIST1H4J:HIST1H4K:HIST1H2BN:HIST1H3I:HIST1H4L:HIST1H3J:HIST1H2BO	http://www.gsea-msigdb.org/gsea/msigdb/cards/REACTOME_CONDENSATION_OF_PROPHASE_CHROMOSOMES
Curated_gene_sets	REACTOME_RHO_GTPASES_ACTIVATE_PKNS	91	12	1.96e-10	8.99e-08	RHOA:HIST1H2BL:HIST1H3H:HIST1H2AJ:HIST1H2BM:HIST1H4J:HIST1H4K:HIST1H2BN:HIST1H3I:HIST1H4L:HIST1H3J:HIST1H2BO	http://www.gsea-msigdb.org/gsea/msigdb/cards/REACTOME_RHO_GTPASES_ACTIVATE_PKNS
Curated_gene_sets	REACTOME_ERCC6_CSB_AND_EHMT2_G9A_POSITIVELY_REGULATE_RRNA_EXPRESSION	72	11	2.21e-10	9.36e-08	HIST1H2BL:HIST1H3H:HIST1H2AJ:HIST1H2BM:HIST1H4J:HIST1H4K:HIST1H2BN:HIST1H3I:HIST1H4L:HIST1H3J:HIST1H2BO	http://www.gsea-msigdb.org/gsea/msigdb/cards/REACTOME_ERCC6_CSB_AND_EHMT2_G9A_POSITIVELY_REGULATE_RRNA_EXPRESSION
Curated_gene_sets	REACTOME_OLFACTORY_SIGNALING_PATHWAY	397	22	2.56e-10	1.01e-07	OR4B1:OR4X2:OR4X1:OR4S1:OR4C3:OR4C5:OR4A47:OR2B2:OR2B6:OR2W1:OR2B3:OR2J1:OR2J3:OR2J2:OR14J1:OR5V1:OR12D3:OR12D2:OR11A1:OR10C1:OR2H1:OR2H2	http://www.gsea-msigdb.org/gsea/msigdb/cards/REACTOME_OLFACTORY_SIGNALING_PATHWAY
Curated_gene_sets	REACTOME_RMTS_METHYLATE_HISTONE_ARGININES	76	11	4.04e-10	1.48e-07	HIST1H2AI:HIST1H3H:HIST1H2AJ:HIST1H4J:HIST1H4K:HIST1H2AK:HIST1H2AL:HIST1H3I:HIST1H4L:HIST1H3J:HIST1H2AM	http://www.gsea-msigdb.org/gsea/msigdb/cards/REACTOME_RMTS_METHYLATE_HISTONE_ARGININES
Curated_gene_sets	REACTOME_BUTYROPHILIN_BTN_FAMILY_INTERACTIONS	11	6	5.29e-10	1.82e-07	BTN3A2:BTN2A2:BTN3A1:BTN3A3:BTN2A1:BTN1A1	http://www.gsea-msigdb.org/gsea/msigdb/cards/REACTOME_BUTYROPHILIN_BTN_FAMILY_INTERACTIONS
Curated_gene_sets	REACTOME_RUNX1_REGULATES_TRANSCRIPTION_OF_GENES_INVOLVED_IN_DIFFERENTIATION_OF_HSCS	125	13	7e-10	2.27e-07	SPI1:PSMC3:HIST1H2BL:HIST1H3H:HIST1H2AJ:HIST1H2BM:HIST1H4J:HIST1H4K:HIST1H2BN:HIST1H3I:HIST1H4L:HIST1H3J:HIST1H2BO	http://www.gsea-msigdb.org/gsea/msigdb/cards/REACTOME_RUNX1_REGULATES_TRANSCRIPTION_OF_GENES_INVOLVED_IN_DIFFERENTIATION_OF_HSCS
Curated_gene_sets	REACTOME_TRANSCRIPTIONAL_REGULATION_BY_SMALL_RNAS	104	12	9.52e-10	2.91e-07	NUP160:HIST1H2BL:HIST1H3H:HIST1H2AJ:HIST1H2BM:HIST1H4J:HIST1H4K:HIST1H2BN:HIST1H3I:HIST1H4L:HIST1H3J:HIST1H2BO	http://www.gsea-msigdb.org/gsea/msigdb/cards/REACTOME_TRANSCRIPTIONAL_REGULATION_BY_SMALL_RNAS
Curated_gene_sets	REACTOME_MEIOTIC_RECOMBINATION	83	11	1.07e-09	3.09e-07	HIST1H2BL:HIST1H3H:HIST1H2AJ:HIST1H2BM:HIST1H4J:HIST1H4K:HIST1H2BN:HIST1H3I:HIST1H4L:HIST1H3J:HIST1H2BO	http://www.gsea-msigdb.org/gsea/msigdb/cards/REACTOME_MEIOTIC_RECOMBINATION
Curated_gene_sets	REACTOME_RNA_POLYMERASE_I_PROMOTER_ESCAPE	86	11	1.57e-09	4.33e-07	HIST1H2BL:HIST1H3H:HIST1H2AJ:HIST1H2BM:HIST1H4J:HIST1H4K:HIST1H2BN:HIST1H3I:HIST1H4L:HIST1H3J:HIST1H2BO	http://www.gsea-msigdb.org/gsea/msigdb/cards/REACTOME_RNA_POLYMERASE_I_PROMOTER_ESCAPE
Curated_gene_sets	REACTOME_CHROMATIN_ORGANIZATION	267	17	3.65e-09	9.57e-07	SUPT20H:HIST1H2BL:HIST1H2AI:HIST1H3H:HIST1H2AJ:HIST1H2BM:HIST1H4J:HIST1H4K:HIST1H2AK:HIST1H2BN:HIST1H2AL:HIST1H3I:HIST1H4L:HIST1H3J:HIST1H2AM:HIST1H2BO:PHF2	http://www.gsea-msigdb.org/gsea/msigdb/cards/REACTOME_CHROMATIN_ORGANIZATION
Curated_gene_sets	REACTOME_ACTIVATION_OF_HOX_GENES_DURING_DIFFERENTIATION	119	12	4.55e-09	1.11e-06	MEIS1:HIST1H2BL:HIST1H3H:HIST1H2AJ:HIST1H2BM:HIST1H4J:HIST1H4K:HIST1H2BN:HIST1H3I:HIST1H4L:HIST1H3J:HIST1H2BO	http://www.gsea-msigdb.org/gsea/msigdb/cards/REACTOME_ACTIVATION_OF_HOX_GENES_DURING_DIFFERENTIATION
Curated_gene_sets	REACTOME_RUNX1_REGULATES_GENES_INVOLVED_IN_MEGAKARYOCYTE_DIFFERENTIATION_AND_PLATELET_FUNCTION	95	11	4.62e-09	1.11e-06	HIST1H2BL:HIST1H3H:HIST1H2AJ:HIST1H2BM:HIST1H4J:HIST1H4K:HIST1H2BN:HIST1H3I:HIST1H4L:HIST1H3J:HIST1H2BO	http://www.gsea-msigdb.org/gsea/msigdb/cards/REACTOME_RUNX1_REGULATES_GENES_INVOLVED_IN_MEGAKARYOCYTE_DIFFERENTIATION_AND_PLATELET_FUNCTION
Curated_gene_sets	KEGG_OLFACTORY_TRANSDUCTION	387	20	5.55e-09	1.27e-06	OR4B1:OR4X2:OR4X1:OR4S1:OR4C3:OR4A47:OR2B2:OR2B6:OR2W1:OR2B3:OR2J3:OR2J2:OR14J1:OR5V1:OR12D3:OR12D2:OR11A1:OR10C1:OR2H1:OR2H2	http://www.gsea-msigdb.org/gsea/msigdb/cards/KEGG_OLFACTORY_TRANSDUCTION
Curated_gene_sets	REACTOME_POSITIVE_EPIGENETIC_REGULATION_OF_RRNA_EXPRESSION	101	11	8.9e-09	1.96e-06	HIST1H2BL:HIST1H3H:HIST1H2AJ:HIST1H2BM:HIST1H4J:HIST1H4K:HIST1H2BN:HIST1H3I:HIST1H4L:HIST1H3J:HIST1H2BO	http://www.gsea-msigdb.org/gsea/msigdb/cards/REACTOME_POSITIVE_EPIGENETIC_REGULATION_OF_RRNA_EXPRESSION
Curated_gene_sets	REACTOME_NEGATIVE_EPIGENETIC_REGULATION_OF_RRNA_EXPRESSION	104	11	1.21e-08	2.57e-06	HIST1H2BL:HIST1H3H:HIST1H2AJ:HIST1H2BM:HIST1H4J:HIST1H4K:HIST1H2BN:HIST1H3I:HIST1H4L:HIST1H3J:HIST1H2BO	http://www.gsea-msigdb.org/gsea/msigdb/cards/REACTOME_NEGATIVE_EPIGENETIC_REGULATION_OF_RRNA_EXPRESSION
Curated_gene_sets	REACTOME_RNA_POLYMERASE_I_TRANSCRIPTION	105	11	1.34e-08	2.74e-06	HIST1H2BL:HIST1H3H:HIST1H2AJ:HIST1H2BM:HIST1H4J:HIST1H4K:HIST1H2BN:HIST1H3I:HIST1H4L:HIST1H3J:HIST1H2BO	http://www.gsea-msigdb.org/gsea/msigdb/cards/REACTOME_RNA_POLYMERASE_I_TRANSCRIPTION
Curated_gene_sets	REACTOME_AMYLOID_FIBER_FORMATION	106	11	1.49e-08	2.82e-06	HIST1H2BL:HIST1H3H:HIST1H2AJ:HIST1H2BM:HIST1H4J:HIST1H4K:HIST1H2BN:HIST1H3I:HIST1H4L:HIST1H3J:HIST1H2BO	http://www.gsea-msigdb.org/gsea/msigdb/cards/REACTOME_AMYLOID_FIBER_FORMATION
Curated_gene_sets	REACTOME_SENESCENCE_ASSOCIATED_SECRETORY_PHENOTYPE_SASP	106	11	1.49e-08	2.82e-06	HIST1H2BL:HIST1H3H:HIST1H2AJ:HIST1H2BM:HIST1H4J:HIST1H4K:HIST1H2BN:HIST1H3I:HIST1H4L:HIST1H3J:HIST1H2BO	http://www.gsea-msigdb.org/gsea/msigdb/cards/REACTOME_SENESCENCE_ASSOCIATED_SECRETORY_PHENOTYPE_SASP
Curated_gene_sets	REACTOME_GENE_SILENCING_BY_RNA	135	12	1.91e-08	3.5e-06	NUP160:HIST1H2BL:HIST1H3H:HIST1H2AJ:HIST1H2BM:HIST1H4J:HIST1H4K:HIST1H2BN:HIST1H3I:HIST1H4L:HIST1H3J:HIST1H2BO	http://www.gsea-msigdb.org/gsea/msigdb/cards/REACTOME_GENE_SILENCING_BY_RNA
Curated_gene_sets	REACTOME_MITOTIC_PROPHASE	140	12	2.88e-08	5.1e-06	NUP160:HIST1H2BL:HIST1H3H:HIST1H2AJ:HIST1H2BM:HIST1H4J:HIST1H4K:HIST1H2BN:HIST1H3I:HIST1H4L:HIST1H3J:HIST1H2BO	http://www.gsea-msigdb.org/gsea/msigdb/cards/REACTOME_MITOTIC_PROPHASE
Curated_gene_sets	REACTOME_MEIOSIS	115	11	3.5e-08	6.02e-06	HIST1H2BL:HIST1H3H:HIST1H2AJ:HIST1H2BM:HIST1H4J:HIST1H4K:HIST1H2BN:HIST1H3I:HIST1H4L:HIST1H3J:HIST1H2BO	http://www.gsea-msigdb.org/gsea/msigdb/cards/REACTOME_MEIOSIS
Curated_gene_sets	REACTOME_PRE_NOTCH_EXPRESSION_AND_PROCESSING	116	11	3.83e-08	6.39e-06	HIST1H2BL:HIST1H3H:HIST1H2AJ:HIST1H2BM:HIST1H4J:HIST1H4K:HIST1H2BN:HIST1H3I:HIST1H4L:HIST1H3J:HIST1H2BO	http://www.gsea-msigdb.org/gsea/msigdb/cards/REACTOME_PRE_NOTCH_EXPRESSION_AND_PROCESSING
Curated_gene_sets	REACTOME_OXIDATIVE_STRESS_INDUCED_SENESCENCE	121	11	5.94e-08	9.62e-06	HIST1H2BL:HIST1H3H:HIST1H2AJ:HIST1H2BM:HIST1H4J:HIST1H4K:HIST1H2BN:HIST1H3I:HIST1H4L:HIST1H3J:HIST1H2BO	http://www.gsea-msigdb.org/gsea/msigdb/cards/REACTOME_OXIDATIVE_STRESS_INDUCED_SENESCENCE
Curated_gene_sets	REACTOME_G_ALPHA_S_SIGNALLING_EVENTS	539	22	6.59e-08	1.04e-05	OR4B1:OR4X2:OR4X1:OR4S1:OR4C3:OR4C5:OR4A47:OR2B2:OR2B6:OR2W1:OR2B3:OR2J1:OR2J3:OR2J2:OR14J1:OR5V1:OR12D3:OR12D2:OR11A1:OR10C1:OR2H1:OR2H2	http://www.gsea-msigdb.org/gsea/msigdb/cards/REACTOME_G_ALPHA_S_SIGNALLING_EVENTS
Curated_gene_sets	REACTOME_DEPURINATION	55	8	9.89e-08	1.51e-05	HIST1H2BL:HIST1H2AJ:HIST1H2BM:HIST1H4J:HIST1H4K:HIST1H2BN:HIST1H4L:HIST1H2BO	http://www.gsea-msigdb.org/gsea/msigdb/cards/REACTOME_DEPURINATION
Curated_gene_sets	NIKOLSKY_BREAST_CANCER_7P22_AMPLICON	38	7	1.17e-07	1.74e-05	COX19:CYP2W1:C7orf50:GPR146:GPER1:ZFAND2A:MAD1L1	http://www.gsea-msigdb.org/gsea/msigdb/cards/NIKOLSKY_BREAST_CANCER_7P22_AMPLICON
Curated_gene_sets	REACTOME_DNA_DAMAGE_TELOMERE_STRESS_INDUCED_SENESCENCE	79	9	1.37e-07	1.98e-05	HIST1H2BL:HIST1H2AJ:HIST1H2BM:HIST1H4J:HIST1H4K:HIST1H2BN:HIST1H1B:HIST1H4L:HIST1H2BO	http://www.gsea-msigdb.org/gsea/msigdb/cards/REACTOME_DNA_DAMAGE_TELOMERE_STRESS_INDUCED_SENESCENCE
Curated_gene_sets	REACTOME_BASE_EXCISION_REPAIR_AP_SITE_FORMATION	62	8	2.58e-07	3.64e-05	HIST1H2BL:HIST1H2AJ:HIST1H2BM:HIST1H4J:HIST1H4K:HIST1H2BN:HIST1H4L:HIST1H2BO	http://www.gsea-msigdb.org/gsea/msigdb/cards/REACTOME_BASE_EXCISION_REPAIR_AP_SITE_FORMATION
Curated_gene_sets	REACTOME_REPRODUCTION	141	11	2.85e-07	3.91e-05	HIST1H2BL:HIST1H3H:HIST1H2AJ:HIST1H2BM:HIST1H4J:HIST1H4K:HIST1H2BN:HIST1H3I:HIST1H4L:HIST1H3J:HIST1H2BO	http://www.gsea-msigdb.org/gsea/msigdb/cards/REACTOME_REPRODUCTION
Curated_gene_sets	REACTOME_EPIGENETIC_REGULATION_OF_GENE_EXPRESSION	142	11	3.06e-07	4.1e-05	HIST1H2BL:HIST1H3H:HIST1H2AJ:HIST1H2BM:HIST1H4J:HIST1H4K:HIST1H2BN:HIST1H3I:HIST1H4L:HIST1H3J:HIST1H2BO	http://www.gsea-msigdb.org/gsea/msigdb/cards/REACTOME_EPIGENETIC_REGULATION_OF_GENE_EXPRESSION
Curated_gene_sets	ACEVEDO_LIVER_CANCER_WITH_H3K9ME3_DN	117	10	4.26e-07	5.54e-05	HMGN4:HIST1H2AI:HIST1H2AJ:HIST1H4J:HIST1H4K:HIST1H2AK:HIST1H2BN:HIST1H2AL:HIST1H4L:HIST1H2AM	http://www.gsea-msigdb.org/gsea/msigdb/cards/ACEVEDO_LIVER_CANCER_WITH_H3K9ME3_DN
Curated_gene_sets	REACTOME_ESTROGEN_DEPENDENT_GENE_EXPRESSION	147	11	4.33e-07	5.54e-05	HIST1H2BL:HIST1H3H:HIST1H2AJ:HIST1H2BM:HIST1H4J:HIST1H4K:HIST1H2BN:HIST1H3I:HIST1H4L:HIST1H3J:HIST1H2BO	http://www.gsea-msigdb.org/gsea/msigdb/cards/REACTOME_ESTROGEN_DEPENDENT_GENE_EXPRESSION
Curated_gene_sets	REACTOME_HDMS_DEMETHYLATE_HISTONES	46	7	4.61e-07	5.77e-05	HIST1H3H:HIST1H4J:HIST1H4K:HIST1H3I:HIST1H4L:HIST1H3J:PHF2	http://www.gsea-msigdb.org/gsea/msigdb/cards/REACTOME_HDMS_DEMETHYLATE_HISTONES
Curated_gene_sets	REACTOME_UB_SPECIFIC_PROCESSING_PROTEASES	218	13	5.4e-07	6.6e-05	PSMC3:USP19:USP4:RNF123:HIST1H2BL:HIST1H2AI:HIST1H2AJ:HIST1H2BM:HIST1H2AK:HIST1H2BN:HIST1H2AL:HIST1H2AM:HIST1H2BO	http://www.gsea-msigdb.org/gsea/msigdb/cards/REACTOME_UB_SPECIFIC_PROCESSING_PROTEASES
Curated_gene_sets	REACTOME_CELLULAR_SENESCENCE	190	12	8.05e-07	9.63e-05	HIST1H2BL:HIST1H3H:HIST1H2AJ:HIST1H2BM:HIST1H4J:HIST1H4K:HIST1H2BN:HIST1H1B:HIST1H3I:HIST1H4L:HIST1H3J:HIST1H2BO	http://www.gsea-msigdb.org/gsea/msigdb/cards/REACTOME_CELLULAR_SENESCENCE
Curated_gene_sets	REACTOME_NUCLEOSOME_ASSEMBLY	72	8	8.34e-07	9.76e-05	HIST1H2BL:HIST1H2AJ:HIST1H2BM:HIST1H4J:HIST1H4K:HIST1H2BN:HIST1H4L:HIST1H2BO	http://www.gsea-msigdb.org/gsea/msigdb/cards/REACTOME_NUCLEOSOME_ASSEMBLY
Curated_gene_sets	REACTOME_TCF_DEPENDENT_SIGNALING_IN_RESPONSE_TO_WNT	227	13	8.52e-07	9.77e-05	PSMC3:TCF4:HIST1H2BL:HIST1H3H:HIST1H2AJ:HIST1H2BM:HIST1H4J:HIST1H4K:HIST1H2BN:HIST1H3I:HIST1H4L:HIST1H3J:HIST1H2BO	http://www.gsea-msigdb.org/gsea/msigdb/cards/REACTOME_TCF_DEPENDENT_SIGNALING_IN_RESPONSE_TO_WNT
Curated_gene_sets	REACTOME_TRANSCRIPTIONAL_REGULATION_BY_RUNX1	233	13	1.14e-06	0.00012823	SPI1:PSMC3:HIST1H2BL:HIST1H3H:HIST1H2AJ:HIST1H2BM:HIST1H4J:HIST1H4K:HIST1H2BN:HIST1H3I:HIST1H4L:HIST1H3J:HIST1H2BO	http://www.gsea-msigdb.org/gsea/msigdb/cards/REACTOME_TRANSCRIPTIONAL_REGULATION_BY_RUNX1
Curated_gene_sets	REACTOME_DNA_DOUBLE_STRAND_BREAK_RESPONSE	76	8	1.27e-06	0.00013943	EYA2:HIST1H2BL:HIST1H2BM:HIST1H4J:HIST1H4K:HIST1H2BN:HIST1H4L:HIST1H2BO	http://www.gsea-msigdb.org/gsea/msigdb/cards/REACTOME_DNA_DOUBLE_STRAND_BREAK_RESPONSE
Curated_gene_sets	REACTOME_MEIOTIC_SYNAPSIS	78	8	1.55e-06	0.00016405	HIST1H2BL:HIST1H2AJ:HIST1H2BM:HIST1H4J:HIST1H4K:HIST1H2BN:HIST1H4L:HIST1H2BO	http://www.gsea-msigdb.org/gsea/msigdb/cards/REACTOME_MEIOTIC_SYNAPSIS
Curated_gene_sets	REACTOME_RHO_GTPASE_EFFECTORS	320	15	1.55e-06	0.00016405	NUP160:NCKIPSD:RHOA:HIST1H2BL:HIST1H3H:HIST1H2AJ:HIST1H2BM:HIST1H4J:HIST1H4K:HIST1H2BN:HIST1H3I:HIST1H4L:HIST1H3J:HIST1H2BO:MAD1L1	http://www.gsea-msigdb.org/gsea/msigdb/cards/REACTOME_RHO_GTPASE_EFFECTORS
Curated_gene_sets	REACTOME_TELOMERE_MAINTENANCE	81	8	2.07e-06	0.0002145	HIST1H2BL:HIST1H2AJ:HIST1H2BM:HIST1H4J:HIST1H4K:HIST1H2BN:HIST1H4L:HIST1H2BO	http://www.gsea-msigdb.org/gsea/msigdb/cards/REACTOME_TELOMERE_MAINTENANCE
Curated_gene_sets	REACTOME_DEUBIQUITINATION	295	14	3e-06	0.00030519	PSMC3:USP19:USP4:RHOA:RNF123:HIST1H2BL:HIST1H2AI:HIST1H2AJ:HIST1H2BM:HIST1H2AK:HIST1H2BN:HIST1H2AL:HIST1H2AM:HIST1H2BO	http://www.gsea-msigdb.org/gsea/msigdb/cards/REACTOME_DEUBIQUITINATION
Curated_gene_sets	REACTOME_BASE_EXCISION_REPAIR	90	8	4.59e-06	0.00045941	HIST1H2BL:HIST1H2AJ:HIST1H2BM:HIST1H4J:HIST1H4K:HIST1H2BN:HIST1H4L:HIST1H2BO	http://www.gsea-msigdb.org/gsea/msigdb/cards/REACTOME_BASE_EXCISION_REPAIR
Curated_gene_sets	REACTOME_NONHOMOLOGOUS_END_JOINING_NHEJ	68	7	6.87e-06	0.00067505	HIST1H2BL:HIST1H2BM:HIST1H4J:HIST1H4K:HIST1H2BN:HIST1H4L:HIST1H2BO	http://www.gsea-msigdb.org/gsea/msigdb/cards/REACTOME_NONHOMOLOGOUS_END_JOINING_NHEJ
Curated_gene_sets	REACTOME_SIGNALING_BY_WNT	322	14	8.16e-06	0.00078739	PSMC3:TCF4:RHOA:HIST1H2BL:HIST1H3H:HIST1H2AJ:HIST1H2BM:HIST1H4J:HIST1H4K:HIST1H2BN:HIST1H3I:HIST1H4L:HIST1H3J:HIST1H2BO	http://www.gsea-msigdb.org/gsea/msigdb/cards/REACTOME_SIGNALING_BY_WNT
Curated_gene_sets	REACTOME_SIGNALING_BY_NOTCH	240	12	9.02e-06	0.00085582	PSMC3:HIST1H2BL:HIST1H3H:HIST1H2AJ:HIST1H2BM:HIST1H4J:HIST1H4K:HIST1H2BN:HIST1H3I:HIST1H4L:HIST1H3J:HIST1H2BO	http://www.gsea-msigdb.org/gsea/msigdb/cards/REACTOME_SIGNALING_BY_NOTCH
Curated_gene_sets	REACTOME_CELLULAR_RESPONSES_TO_STRESS	431	16	1.36e-05	0.00126527	ACTR1A:PSMC3:NUP160:GPX1:HIST1H2BL:HIST1H3H:HIST1H2AJ:HIST1H2BM:HIST1H4J:HIST1H4K:HIST1H2BN:HIST1H1B:HIST1H3I:HIST1H4L:HIST1H3J:HIST1H2BO	http://www.gsea-msigdb.org/gsea/msigdb/cards/REACTOME_CELLULAR_RESPONSES_TO_STRESS
Curated_gene_sets	REACTOME_M_PHASE	387	15	1.53e-05	0.00139839	ACTR1A:PSMC3:NUP160:HIST1H2BL:HIST1H3H:HIST1H2AJ:HIST1H2BM:HIST1H4J:HIST1H4K:HIST1H2BN:HIST1H3I:HIST1H4L:HIST1H3J:HIST1H2BO:MAD1L1	http://www.gsea-msigdb.org/gsea/msigdb/cards/REACTOME_M_PHASE
Curated_gene_sets	ACEVEDO_LIVER_CANCER_WITH_H3K27ME3_DN	215	11	1.72e-05	0.00154956	SHISA4:RBFOX1:HIST1H2AI:HIST1H2AJ:HIST1H4J:HIST1H4K:HIST1H2AK:HIST1H2AL:HIST1H4L:HIST1H2AM:HIST1H2BO	http://www.gsea-msigdb.org/gsea/msigdb/cards/ACEVEDO_LIVER_CANCER_WITH_H3K27ME3_DN
Curated_gene_sets	REACTOME_CHROMOSOME_MAINTENANCE	108	8	1.77e-05	0.00157451	HIST1H2BL:HIST1H2AJ:HIST1H2BM:HIST1H4J:HIST1H4K:HIST1H2BN:HIST1H4L:HIST1H2BO	http://www.gsea-msigdb.org/gsea/msigdb/cards/REACTOME_CHROMOSOME_MAINTENANCE
Curated_gene_sets	REACTOME_ESR_MEDIATED_SIGNALING	218	11	1.95e-05	0.00170618	HIST1H2BL:HIST1H3H:HIST1H2AJ:HIST1H2BM:HIST1H4J:HIST1H4K:HIST1H2BN:HIST1H3I:HIST1H4L:HIST1H3J:HIST1H2BO	http://www.gsea-msigdb.org/gsea/msigdb/cards/REACTOME_ESR_MEDIATED_SIGNALING
Curated_gene_sets	REACTOME_SIGNALING_BY_RHO_GTPASES	449	16	2.23e-05	0.00191975	NUP160:ARHGAP27:NCKIPSD:RHOA:HIST1H2BL:HIST1H3H:HIST1H2AJ:HIST1H2BM:HIST1H4J:HIST1H4K:HIST1H2BN:HIST1H3I:HIST1H4L:HIST1H3J:HIST1H2BO:MAD1L1	http://www.gsea-msigdb.org/gsea/msigdb/cards/REACTOME_SIGNALING_BY_RHO_GTPASES
Curated_gene_sets	REACTOME_METALLOPROTEASE_DUBS	36	5	3.38e-05	0.00286303	HIST1H2AI:HIST1H2AJ:HIST1H2AK:HIST1H2AL:HIST1H2AM	http://www.gsea-msigdb.org/gsea/msigdb/cards/REACTOME_METALLOPROTEASE_DUBS
Curated_gene_sets	REACTOME_SIGNALING_BY_GPCR	1169	28	4.17e-05	0.00347772	OR4B1:OR4X2:OR4X1:OR4S1:OR4C3:OR4C5:OR4A47:STRA6:PRKAR2A:RHOA:GNAT1:OR2B2:OR2B6:OR2W1:OR2B3:OR2J1:OR2J3:OR2J2:OR14J1:OR5V1:OR12D3:OR12D2:OR11A1:OR10C1:OR2H1:GABBR1:OR2H2:GPER1	http://www.gsea-msigdb.org/gsea/msigdb/cards/REACTOME_SIGNALING_BY_GPCR
Curated_gene_sets	HASLINGER_B_CLL_WITH_6Q21_DELETION	20	4	4.84e-05	0.00397384	HIST1H2BM:HIST1H2AK:HIST1H2AL:HIST1H2BO	http://www.gsea-msigdb.org/gsea/msigdb/cards/HASLINGER_B_CLL_WITH_6Q21_DELETION
Curated_gene_sets	REACTOME_G2_M_DNA_DAMAGE_CHECKPOINT	94	7	5.76e-05	0.00466194	HIST1H2BL:HIST1H2BM:HIST1H4J:HIST1H4K:HIST1H2BN:HIST1H4L:HIST1H2BO	http://www.gsea-msigdb.org/gsea/msigdb/cards/REACTOME_G2_M_DNA_DAMAGE_CHECKPOINT
Curated_gene_sets	REACTOME_PROCESSING_OF_DNA_DOUBLE_STRAND_BREAK_ENDS	97	7	7.04e-05	0.0056151	HIST1H2BL:HIST1H2BM:HIST1H4J:HIST1H4K:HIST1H2BN:HIST1H4L:HIST1H2BO	http://www.gsea-msigdb.org/gsea/msigdb/cards/REACTOME_PROCESSING_OF_DNA_DOUBLE_STRAND_BREAK_ENDS
Curated_gene_sets	REACTOME_PKMTS_METHYLATE_HISTONE_LYSINES	68	6	7.62e-05	0.00598515	HIST1H3H:HIST1H4J:HIST1H4K:HIST1H3I:HIST1H4L:HIST1H3J	http://www.gsea-msigdb.org/gsea/msigdb/cards/REACTOME_PKMTS_METHYLATE_HISTONE_LYSINES
Curated_gene_sets	REACTOME_SIGNALING_BY_NUCLEAR_RECEPTORS	261	11	9.97e-05	0.00772079	HIST1H2BL:HIST1H3H:HIST1H2AJ:HIST1H2BM:HIST1H4J:HIST1H4K:HIST1H2BN:HIST1H3I:HIST1H4L:HIST1H3J:HIST1H2BO	http://www.gsea-msigdb.org/gsea/msigdb/cards/REACTOME_SIGNALING_BY_NUCLEAR_RECEPTORS
Curated_gene_sets	REACTOME_CELLULAR_RESPONSES_TO_EXTERNAL_STIMULI	525	16	0.00013978	0.0106796	ACTR1A:PSMC3:NUP160:GPX1:HIST1H2BL:HIST1H3H:HIST1H2AJ:HIST1H2BM:HIST1H4J:HIST1H4K:HIST1H2BN:HIST1H1B:HIST1H3I:HIST1H4L:HIST1H3J:HIST1H2BO	http://www.gsea-msigdb.org/gsea/msigdb/cards/REACTOME_CELLULAR_RESPONSES_TO_EXTERNAL_STIMULI
Curated_gene_sets	REACTOME_POST_TRANSLATIONAL_PROTEIN_MODIFICATION	1417	30	0.0001987	0.0149733	NEGR1:ACTR1A:PSMC3:AGBL2:NUP160:NTM:ALG5:USP19:LAMB2:USP4:RHOA:NICN1:DAG1:RNF123:GMPPB:LSAMP:HIST1H2BL:HIST1H2AI:HIST1H2AJ:HIST1H2BM:HIST1H4J:HIST1H4K:HIST1H2AK:HIST1H2BN:HIST1H2AL:HIST1H4L:HIST1H2AM:HIST1H2BO:TRIM27:UBD	http://www.gsea-msigdb.org/gsea/msigdb/cards/REACTOME_POST_TRANSLATIONAL_PROTEIN_MODIFICATION
Curated_gene_sets	REACTOME_G2_M_CHECKPOINTS	165	8	0.00034724	0.025469	PSMC3:HIST1H2BL:HIST1H2BM:HIST1H4J:HIST1H4K:HIST1H2BN:HIST1H4L:HIST1H2BO	http://www.gsea-msigdb.org/gsea/msigdb/cards/REACTOME_G2_M_CHECKPOINTS
Curated_gene_sets	REACTOME_DNA_DOUBLE_STRAND_BREAK_REPAIR	165	8	0.00034724	0.025469	EYA2:HIST1H2BL:HIST1H2BM:HIST1H4J:HIST1H4K:HIST1H2BN:HIST1H4L:HIST1H2BO	http://www.gsea-msigdb.org/gsea/msigdb/cards/REACTOME_DNA_DOUBLE_STRAND_BREAK_REPAIR
Curated_gene_sets	REACTOME_GENERIC_TRANSCRIPTION_PATHWAY	1202	26	0.00038357	0.0277636	PCGF6:SPI1:PSMC3:RBFOX1:ZNF568:ZNF420:ZNF585A:ZNF585B:ZNF383:HKR1:MEF2C:HIST1H2BL:HIST1H3H:HIST1H2AJ:HIST1H2BM:HIST1H4J:HIST1H4K:HIST1H2BN:HIST1H3I:HIST1H4L:HIST1H3J:HIST1H2BO:ZKSCAN8:ZKSCAN4:ZKSCAN3:ZNF311	http://www.gsea-msigdb.org/gsea/msigdb/cards/REACTOME_GENERIC_TRANSCRIPTION_PATHWAY
Curated_gene_sets	REACTOME_CELL_CYCLE_MITOTIC	530	15	0.00048735	0.0348173	ACTR1A:PSMC3:NUP160:HIST1H2BL:HIST1H3H:HIST1H2AJ:HIST1H2BM:HIST1H4J:HIST1H4K:HIST1H2BN:HIST1H3I:HIST1H4L:HIST1H3J:HIST1H2BO:MAD1L1	http://www.gsea-msigdb.org/gsea/msigdb/cards/REACTOME_CELL_CYCLE_MITOTIC
Curated_gene_sets	HOLLERN_ADENOMYOEPITHELIAL_BREAST_TUMOR	16	3	0.0005609	0.0395578	ISLR:MEF2C:GABBR1	http://www.gsea-msigdb.org/gsea/msigdb/cards/HOLLERN_ADENOMYOEPITHELIAL_BREAST_TUMOR
Curated_gene_sets	REACTOME_HOMOLOGY_DIRECTED_REPAIR	137	7	0.00059269	0.0409805	HIST1H2BL:HIST1H2BM:HIST1H4J:HIST1H4K:HIST1H2BN:HIST1H4L:HIST1H2BO	http://www.gsea-msigdb.org/gsea/msigdb/cards/REACTOME_HOMOLOGY_DIRECTED_REPAIR
Curated_gene_sets	REACTOME_UCH_PROTEINASES	99	6	0.00059597	0.0409805	PSMC3:HIST1H2AI:HIST1H2AJ:HIST1H2AK:HIST1H2AL:HIST1H2AM	http://www.gsea-msigdb.org/gsea/msigdb/cards/REACTOME_UCH_PROTEINASES
Curated_gene_sets	REACTOME_DNA_REPAIR	328	11	0.00069765	0.0473798	EYA2:UBA7:HIST1H2BL:HIST1H2AJ:HIST1H2BM:HIST1H4J:HIST1H4K:HIST1H2BN:HIST1H4L:HIST1H2BO:ASCC3	http://www.gsea-msigdb.org/gsea/msigdb/cards/REACTOME_DNA_REPAIR
KEGG	KEGG_SYSTEMIC_LUPUS_ERYTHEMATOSUS	119	15	2.03e-12	3.77e-10	HIST1H2BL:HIST1H2AI:HIST1H3H:HIST1H2AJ:HIST1H2BM:HIST1H4J:HIST1H4K:HIST1H2AK:HIST1H2BN:HIST1H2AL:HIST1H3I:HIST1H4L:HIST1H3J:HIST1H2AM:HIST1H2BO	http://www.gsea-msigdb.org/gsea/msigdb/cards/KEGG_SYSTEMIC_LUPUS_ERYTHEMATOSUS
KEGG	KEGG_OLFACTORY_TRANSDUCTION	387	20	5.55e-09	5.16e-07	OR4B1:OR4X2:OR4X1:OR4S1:OR4C3:OR4A47:OR2B2:OR2B6:OR2W1:OR2B3:OR2J3:OR2J2:OR14J1:OR5V1:OR12D3:OR12D2:OR11A1:OR10C1:OR2H1:OR2H2	http://www.gsea-msigdb.org/gsea/msigdb/cards/KEGG_OLFACTORY_TRANSDUCTION
TF_targets	KRCTCNNNNMANAGC_UNKNOWN	65	14	4.92e-15	3e-12	HIST1H2BL:HIST1H2AI:HIST1H3H:HIST1H2AJ:HIST1H2BM:HIST1H2AK:HIST1H2BN:HIST1H2AL:HIST1H1B:HIST1H3I:HIST1H4L:HIST1H3J:HIST1H2AM:HIST1H2BO	http://www.gsea-msigdb.org/gsea/msigdb/cards/KRCTCNNNNMANAGC_UNKNOWN
TF_targets	TTTNNANAGCYR_UNKNOWN	134	12	1.76e-08	5.36e-06	TCF4:MEIS1:HIST1H2BL:HIST1H2AI:HIST1H3H:HIST1H2AK:HIST1H2BN:HIST1H2AL:HIST1H1B:HIST1H3J:HIST1H2AM:HIST1H2BO	http://www.gsea-msigdb.org/gsea/msigdb/cards/TTTNNANAGCYR_UNKNOWN
TF_targets	PAX2_02	265	11	0.00011394	0.0231673	CTNND1:TCF4:ZMYND8:IP6K2:GPX1:RHOA:TCTA:LSAMP:ASCC3:FOXP2:CSMD3	http://www.gsea-msigdb.org/gsea/msigdb/cards/PAX2_02
Reactome	REACTOME_HDACS_DEACETYLATE_HISTONES	91	15	3.49e-14	5.23e-11	HIST1H2BL:HIST1H2AI:HIST1H3H:HIST1H2AJ:HIST1H2BM:HIST1H4J:HIST1H4K:HIST1H2AK:HIST1H2BN:HIST1H2AL:HIST1H3I:HIST1H4L:HIST1H3J:HIST1H2AM:HIST1H2BO	http://www.gsea-msigdb.org/gsea/msigdb/cards/REACTOME_HDACS_DEACETYLATE_HISTONES
Reactome	REACTOME_HATS_ACETYLATE_HISTONES	138	16	1.38e-12	1.03e-09	SUPT20H:HIST1H2BL:HIST1H2AI:HIST1H3H:HIST1H2AJ:HIST1H2BM:HIST1H4J:HIST1H4K:HIST1H2AK:HIST1H2BN:HIST1H2AL:HIST1H3I:HIST1H4L:HIST1H3J:HIST1H2AM:HIST1H2BO	http://www.gsea-msigdb.org/gsea/msigdb/cards/REACTOME_HATS_ACETYLATE_HISTONES
Reactome	REACTOME_DNA_METHYLATION	62	11	4.08e-11	2.04e-08	HIST1H2BL:HIST1H3H:HIST1H2AJ:HIST1H2BM:HIST1H4J:HIST1H4K:HIST1H2BN:HIST1H3I:HIST1H4L:HIST1H3J:HIST1H2BO	http://www.gsea-msigdb.org/gsea/msigdb/cards/REACTOME_DNA_METHYLATION
Reactome	REACTOME_ACTIVATED_PKN1_STIMULATES_TRANSCRIPTION_OF_AR_ANDROGEN_RECEPTOR_REGULATED_GENES_KLK2_AND_KLK3	64	11	5.86e-11	2.1e-08	HIST1H2BL:HIST1H3H:HIST1H2AJ:HIST1H2BM:HIST1H4J:HIST1H4K:HIST1H2BN:HIST1H3I:HIST1H4L:HIST1H3J:HIST1H2BO	http://www.gsea-msigdb.org/gsea/msigdb/cards/REACTOME_ACTIVATED_PKN1_STIMULATES_TRANSCRIPTION_OF_AR_ANDROGEN_RECEPTOR_REGULATED_GENES_KLK2_AND_KLK3
Reactome	REACTOME_SIRT1_NEGATIVELY_REGULATES_RRNA_EXPRESSION	65	11	6.99e-11	2.1e-08	HIST1H2BL:HIST1H3H:HIST1H2AJ:HIST1H2BM:HIST1H4J:HIST1H4K:HIST1H2BN:HIST1H3I:HIST1H4L:HIST1H3J:HIST1H2BO	http://www.gsea-msigdb.org/gsea/msigdb/cards/REACTOME_SIRT1_NEGATIVELY_REGULATES_RRNA_EXPRESSION
Reactome	REACTOME_TRANSCRIPTIONAL_REGULATION_OF_GRANULOPOIESIS	87	12	1.14e-10	2.86e-08	SPI1:HIST1H2BL:HIST1H3H:HIST1H2AJ:HIST1H2BM:HIST1H4J:HIST1H4K:HIST1H2BN:HIST1H3I:HIST1H4L:HIST1H3J:HIST1H2BO	http://www.gsea-msigdb.org/gsea/msigdb/cards/REACTOME_TRANSCRIPTIONAL_REGULATION_OF_GRANULOPOIESIS
Reactome	REACTOME_FORMATION_OF_THE_BETA_CATENIN:TCF_TRANSACTIVATING_COMPLEX	89	12	1.5e-10	2.94e-08	TCF4:HIST1H2BL:HIST1H3H:HIST1H2AJ:HIST1H2BM:HIST1H4J:HIST1H4K:HIST1H2BN:HIST1H3I:HIST1H4L:HIST1H3J:HIST1H2BO	http://www.gsea-msigdb.org/gsea/msigdb/cards/REACTOME_FORMATION_OF_THE_BETA_CATENIN:TCF_TRANSACTIVATING_COMPLEX
Reactome	REACTOME_PRC2_METHYLATES_HISTONES_AND_DNA	70	11	1.61e-10	2.94e-08	HIST1H2BL:HIST1H3H:HIST1H2AJ:HIST1H2BM:HIST1H4J:HIST1H4K:HIST1H2BN:HIST1H3I:HIST1H4L:HIST1H3J:HIST1H2BO	http://www.gsea-msigdb.org/gsea/msigdb/cards/REACTOME_PRC2_METHYLATES_HISTONES_AND_DNA
Reactome	REACTOME_CONDENSATION_OF_PROPHASE_CHROMOSOMES	71	11	1.89e-10	2.94e-08	HIST1H2BL:HIST1H3H:HIST1H2AJ:HIST1H2BM:HIST1H4J:HIST1H4K:HIST1H2BN:HIST1H3I:HIST1H4L:HIST1H3J:HIST1H2BO	http://www.gsea-msigdb.org/gsea/msigdb/cards/REACTOME_CONDENSATION_OF_PROPHASE_CHROMOSOMES
Reactome	REACTOME_RHO_GTPASES_ACTIVATE_PKNS	91	12	1.96e-10	2.94e-08	RHOA:HIST1H2BL:HIST1H3H:HIST1H2AJ:HIST1H2BM:HIST1H4J:HIST1H4K:HIST1H2BN:HIST1H3I:HIST1H4L:HIST1H3J:HIST1H2BO	http://www.gsea-msigdb.org/gsea/msigdb/cards/REACTOME_RHO_GTPASES_ACTIVATE_PKNS
Reactome	REACTOME_ERCC6_CSB_AND_EHMT2_G9A_POSITIVELY_REGULATE_RRNA_EXPRESSION	72	11	2.21e-10	3.01e-08	HIST1H2BL:HIST1H3H:HIST1H2AJ:HIST1H2BM:HIST1H4J:HIST1H4K:HIST1H2BN:HIST1H3I:HIST1H4L:HIST1H3J:HIST1H2BO	http://www.gsea-msigdb.org/gsea/msigdb/cards/REACTOME_ERCC6_CSB_AND_EHMT2_G9A_POSITIVELY_REGULATE_RRNA_EXPRESSION
Reactome	REACTOME_OLFACTORY_SIGNALING_PATHWAY	397	22	2.56e-10	3.2e-08	OR4B1:OR4X2:OR4X1:OR4S1:OR4C3:OR4C5:OR4A47:OR2B2:OR2B6:OR2W1:OR2B3:OR2J1:OR2J3:OR2J2:OR14J1:OR5V1:OR12D3:OR12D2:OR11A1:OR10C1:OR2H1:OR2H2	http://www.gsea-msigdb.org/gsea/msigdb/cards/REACTOME_OLFACTORY_SIGNALING_PATHWAY
Reactome	REACTOME_RMTS_METHYLATE_HISTONE_ARGININES	76	11	4.04e-10	4.66e-08	HIST1H2AI:HIST1H3H:HIST1H2AJ:HIST1H4J:HIST1H4K:HIST1H2AK:HIST1H2AL:HIST1H3I:HIST1H4L:HIST1H3J:HIST1H2AM	http://www.gsea-msigdb.org/gsea/msigdb/cards/REACTOME_RMTS_METHYLATE_HISTONE_ARGININES
Reactome	REACTOME_BUTYROPHILIN_BTN_FAMILY_INTERACTIONS	11	6	5.29e-10	5.66e-08	BTN3A2:BTN2A2:BTN3A1:BTN3A3:BTN2A1:BTN1A1	http://www.gsea-msigdb.org/gsea/msigdb/cards/REACTOME_BUTYROPHILIN_BTN_FAMILY_INTERACTIONS
Reactome	REACTOME_RUNX1_REGULATES_TRANSCRIPTION_OF_GENES_INVOLVED_IN_DIFFERENTIATION_OF_HSCS	125	13	7e-10	7e-08	SPI1:PSMC3:HIST1H2BL:HIST1H3H:HIST1H2AJ:HIST1H2BM:HIST1H4J:HIST1H4K:HIST1H2BN:HIST1H3I:HIST1H4L:HIST1H3J:HIST1H2BO	http://www.gsea-msigdb.org/gsea/msigdb/cards/REACTOME_RUNX1_REGULATES_TRANSCRIPTION_OF_GENES_INVOLVED_IN_DIFFERENTIATION_OF_HSCS
Reactome	REACTOME_TRANSCRIPTIONAL_REGULATION_BY_SMALL_RNAS	104	12	9.52e-10	8.92e-08	NUP160:HIST1H2BL:HIST1H3H:HIST1H2AJ:HIST1H2BM:HIST1H4J:HIST1H4K:HIST1H2BN:HIST1H3I:HIST1H4L:HIST1H3J:HIST1H2BO	http://www.gsea-msigdb.org/gsea/msigdb/cards/REACTOME_TRANSCRIPTIONAL_REGULATION_BY_SMALL_RNAS
Reactome	REACTOME_MEIOTIC_RECOMBINATION	83	11	1.07e-09	9.41e-08	HIST1H2BL:HIST1H3H:HIST1H2AJ:HIST1H2BM:HIST1H4J:HIST1H4K:HIST1H2BN:HIST1H3I:HIST1H4L:HIST1H3J:HIST1H2BO	http://www.gsea-msigdb.org/gsea/msigdb/cards/REACTOME_MEIOTIC_RECOMBINATION
Reactome	REACTOME_RNA_POLYMERASE_I_PROMOTER_ESCAPE	86	11	1.57e-09	1.31e-07	HIST1H2BL:HIST1H3H:HIST1H2AJ:HIST1H2BM:HIST1H4J:HIST1H4K:HIST1H2BN:HIST1H3I:HIST1H4L:HIST1H3J:HIST1H2BO	http://www.gsea-msigdb.org/gsea/msigdb/cards/REACTOME_RNA_POLYMERASE_I_PROMOTER_ESCAPE
Reactome	REACTOME_CHROMATIN_ORGANIZATION	267	17	3.65e-09	2.88e-07	SUPT20H:HIST1H2BL:HIST1H2AI:HIST1H3H:HIST1H2AJ:HIST1H2BM:HIST1H4J:HIST1H4K:HIST1H2AK:HIST1H2BN:HIST1H2AL:HIST1H3I:HIST1H4L:HIST1H3J:HIST1H2AM:HIST1H2BO:PHF2	http://www.gsea-msigdb.org/gsea/msigdb/cards/REACTOME_CHROMATIN_ORGANIZATION
Reactome	REACTOME_ACTIVATION_OF_HOX_GENES_DURING_DIFFERENTIATION	119	12	4.55e-09	3.3e-07	MEIS1:HIST1H2BL:HIST1H3H:HIST1H2AJ:HIST1H2BM:HIST1H4J:HIST1H4K:HIST1H2BN:HIST1H3I:HIST1H4L:HIST1H3J:HIST1H2BO	http://www.gsea-msigdb.org/gsea/msigdb/cards/REACTOME_ACTIVATION_OF_HOX_GENES_DURING_DIFFERENTIATION
Reactome	REACTOME_RUNX1_REGULATES_GENES_INVOLVED_IN_MEGAKARYOCYTE_DIFFERENTIATION_AND_PLATELET_FUNCTION	95	11	4.62e-09	3.3e-07	HIST1H2BL:HIST1H3H:HIST1H2AJ:HIST1H2BM:HIST1H4J:HIST1H4K:HIST1H2BN:HIST1H3I:HIST1H4L:HIST1H3J:HIST1H2BO	http://www.gsea-msigdb.org/gsea/msigdb/cards/REACTOME_RUNX1_REGULATES_GENES_INVOLVED_IN_MEGAKARYOCYTE_DIFFERENTIATION_AND_PLATELET_FUNCTION
Reactome	REACTOME_POSITIVE_EPIGENETIC_REGULATION_OF_RRNA_EXPRESSION	101	11	8.9e-09	6.06e-07	HIST1H2BL:HIST1H3H:HIST1H2AJ:HIST1H2BM:HIST1H4J:HIST1H4K:HIST1H2BN:HIST1H3I:HIST1H4L:HIST1H3J:HIST1H2BO	http://www.gsea-msigdb.org/gsea/msigdb/cards/REACTOME_POSITIVE_EPIGENETIC_REGULATION_OF_RRNA_EXPRESSION
Reactome	REACTOME_NEGATIVE_EPIGENETIC_REGULATION_OF_RRNA_EXPRESSION	104	11	1.21e-08	7.92e-07	HIST1H2BL:HIST1H3H:HIST1H2AJ:HIST1H2BM:HIST1H4J:HIST1H4K:HIST1H2BN:HIST1H3I:HIST1H4L:HIST1H3J:HIST1H2BO	http://www.gsea-msigdb.org/gsea/msigdb/cards/REACTOME_NEGATIVE_EPIGENETIC_REGULATION_OF_RRNA_EXPRESSION
Reactome	REACTOME_RNA_POLYMERASE_I_TRANSCRIPTION	105	11	1.34e-08	8.4e-07	HIST1H2BL:HIST1H3H:HIST1H2AJ:HIST1H2BM:HIST1H4J:HIST1H4K:HIST1H2BN:HIST1H3I:HIST1H4L:HIST1H3J:HIST1H2BO	http://www.gsea-msigdb.org/gsea/msigdb/cards/REACTOME_RNA_POLYMERASE_I_TRANSCRIPTION
Reactome	REACTOME_SENESCENCE_ASSOCIATED_SECRETORY_PHENOTYPE_SASP	106	11	1.49e-08	8.57e-07	HIST1H2BL:HIST1H3H:HIST1H2AJ:HIST1H2BM:HIST1H4J:HIST1H4K:HIST1H2BN:HIST1H3I:HIST1H4L:HIST1H3J:HIST1H2BO	http://www.gsea-msigdb.org/gsea/msigdb/cards/REACTOME_SENESCENCE_ASSOCIATED_SECRETORY_PHENOTYPE_SASP
Reactome	REACTOME_AMYLOID_FIBER_FORMATION	106	11	1.49e-08	8.57e-07	HIST1H2BL:HIST1H3H:HIST1H2AJ:HIST1H2BM:HIST1H4J:HIST1H4K:HIST1H2BN:HIST1H3I:HIST1H4L:HIST1H3J:HIST1H2BO	http://www.gsea-msigdb.org/gsea/msigdb/cards/REACTOME_AMYLOID_FIBER_FORMATION
Reactome	REACTOME_GENE_SILENCING_BY_RNA	135	12	1.91e-08	1.06e-06	NUP160:HIST1H2BL:HIST1H3H:HIST1H2AJ:HIST1H2BM:HIST1H4J:HIST1H4K:HIST1H2BN:HIST1H3I:HIST1H4L:HIST1H3J:HIST1H2BO	http://www.gsea-msigdb.org/gsea/msigdb/cards/REACTOME_GENE_SILENCING_BY_RNA
Reactome	REACTOME_MITOTIC_PROPHASE	140	12	2.88e-08	1.54e-06	NUP160:HIST1H2BL:HIST1H3H:HIST1H2AJ:HIST1H2BM:HIST1H4J:HIST1H4K:HIST1H2BN:HIST1H3I:HIST1H4L:HIST1H3J:HIST1H2BO	http://www.gsea-msigdb.org/gsea/msigdb/cards/REACTOME_MITOTIC_PROPHASE
Reactome	REACTOME_MEIOSIS	115	11	3.5e-08	1.81e-06	HIST1H2BL:HIST1H3H:HIST1H2AJ:HIST1H2BM:HIST1H4J:HIST1H4K:HIST1H2BN:HIST1H3I:HIST1H4L:HIST1H3J:HIST1H2BO	http://www.gsea-msigdb.org/gsea/msigdb/cards/REACTOME_MEIOSIS
Reactome	REACTOME_PRE_NOTCH_EXPRESSION_AND_PROCESSING	116	11	3.83e-08	1.91e-06	HIST1H2BL:HIST1H3H:HIST1H2AJ:HIST1H2BM:HIST1H4J:HIST1H4K:HIST1H2BN:HIST1H3I:HIST1H4L:HIST1H3J:HIST1H2BO	http://www.gsea-msigdb.org/gsea/msigdb/cards/REACTOME_PRE_NOTCH_EXPRESSION_AND_PROCESSING
Reactome	REACTOME_OXIDATIVE_STRESS_INDUCED_SENESCENCE	121	11	5.94e-08	2.87e-06	HIST1H2BL:HIST1H3H:HIST1H2AJ:HIST1H2BM:HIST1H4J:HIST1H4K:HIST1H2BN:HIST1H3I:HIST1H4L:HIST1H3J:HIST1H2BO	http://www.gsea-msigdb.org/gsea/msigdb/cards/REACTOME_OXIDATIVE_STRESS_INDUCED_SENESCENCE
Reactome	REACTOME_G_ALPHA_S_SIGNALLING_EVENTS	539	22	6.59e-08	3.09e-06	OR4B1:OR4X2:OR4X1:OR4S1:OR4C3:OR4C5:OR4A47:OR2B2:OR2B6:OR2W1:OR2B3:OR2J1:OR2J3:OR2J2:OR14J1:OR5V1:OR12D3:OR12D2:OR11A1:OR10C1:OR2H1:OR2H2	http://www.gsea-msigdb.org/gsea/msigdb/cards/REACTOME_G_ALPHA_S_SIGNALLING_EVENTS
Reactome	REACTOME_DEPURINATION	55	8	9.89e-08	4.49e-06	HIST1H2BL:HIST1H2AJ:HIST1H2BM:HIST1H4J:HIST1H4K:HIST1H2BN:HIST1H4L:HIST1H2BO	http://www.gsea-msigdb.org/gsea/msigdb/cards/REACTOME_DEPURINATION
Reactome	REACTOME_DNA_DAMAGE_TELOMERE_STRESS_INDUCED_SENESCENCE	79	9	1.37e-07	6.04e-06	HIST1H2BL:HIST1H2AJ:HIST1H2BM:HIST1H4J:HIST1H4K:HIST1H2BN:HIST1H1B:HIST1H4L:HIST1H2BO	http://www.gsea-msigdb.org/gsea/msigdb/cards/REACTOME_DNA_DAMAGE_TELOMERE_STRESS_INDUCED_SENESCENCE
Reactome	REACTOME_BASE_EXCISION_REPAIR_AP_SITE_FORMATION	62	8	2.58e-07	1.1e-05	HIST1H2BL:HIST1H2AJ:HIST1H2BM:HIST1H4J:HIST1H4K:HIST1H2BN:HIST1H4L:HIST1H2BO	http://www.gsea-msigdb.org/gsea/msigdb/cards/REACTOME_BASE_EXCISION_REPAIR_AP_SITE_FORMATION
Reactome	REACTOME_REPRODUCTION	141	11	2.85e-07	1.19e-05	HIST1H2BL:HIST1H3H:HIST1H2AJ:HIST1H2BM:HIST1H4J:HIST1H4K:HIST1H2BN:HIST1H3I:HIST1H4L:HIST1H3J:HIST1H2BO	http://www.gsea-msigdb.org/gsea/msigdb/cards/REACTOME_REPRODUCTION
Reactome	REACTOME_EPIGENETIC_REGULATION_OF_GENE_EXPRESSION	142	11	3.06e-07	1.24e-05	HIST1H2BL:HIST1H3H:HIST1H2AJ:HIST1H2BM:HIST1H4J:HIST1H4K:HIST1H2BN:HIST1H3I:HIST1H4L:HIST1H3J:HIST1H2BO	http://www.gsea-msigdb.org/gsea/msigdb/cards/REACTOME_EPIGENETIC_REGULATION_OF_GENE_EXPRESSION
Reactome	REACTOME_ESTROGEN_DEPENDENT_GENE_EXPRESSION	147	11	4.33e-07	1.71e-05	HIST1H2BL:HIST1H3H:HIST1H2AJ:HIST1H2BM:HIST1H4J:HIST1H4K:HIST1H2BN:HIST1H3I:HIST1H4L:HIST1H3J:HIST1H2BO	http://www.gsea-msigdb.org/gsea/msigdb/cards/REACTOME_ESTROGEN_DEPENDENT_GENE_EXPRESSION
Reactome	REACTOME_HDMS_DEMETHYLATE_HISTONES	46	7	4.61e-07	1.77e-05	HIST1H3H:HIST1H4J:HIST1H4K:HIST1H3I:HIST1H4L:HIST1H3J:PHF2	http://www.gsea-msigdb.org/gsea/msigdb/cards/REACTOME_HDMS_DEMETHYLATE_HISTONES
Reactome	REACTOME_UB_SPECIFIC_PROCESSING_PROTEASES	218	13	5.4e-07	2.02e-05	PSMC3:USP19:USP4:RNF123:HIST1H2BL:HIST1H2AI:HIST1H2AJ:HIST1H2BM:HIST1H2AK:HIST1H2BN:HIST1H2AL:HIST1H2AM:HIST1H2BO	http://www.gsea-msigdb.org/gsea/msigdb/cards/REACTOME_UB_SPECIFIC_PROCESSING_PROTEASES
Reactome	REACTOME_CELLULAR_SENESCENCE	190	12	8.05e-07	2.94e-05	HIST1H2BL:HIST1H3H:HIST1H2AJ:HIST1H2BM:HIST1H4J:HIST1H4K:HIST1H2BN:HIST1H1B:HIST1H3I:HIST1H4L:HIST1H3J:HIST1H2BO	http://www.gsea-msigdb.org/gsea/msigdb/cards/REACTOME_CELLULAR_SENESCENCE
Reactome	REACTOME_NUCLEOSOME_ASSEMBLY	72	8	8.34e-07	2.97e-05	HIST1H2BL:HIST1H2AJ:HIST1H2BM:HIST1H4J:HIST1H4K:HIST1H2BN:HIST1H4L:HIST1H2BO	http://www.gsea-msigdb.org/gsea/msigdb/cards/REACTOME_NUCLEOSOME_ASSEMBLY
Reactome	REACTOME_TCF_DEPENDENT_SIGNALING_IN_RESPONSE_TO_WNT	227	13	8.52e-07	2.97e-05	PSMC3:TCF4:HIST1H2BL:HIST1H3H:HIST1H2AJ:HIST1H2BM:HIST1H4J:HIST1H4K:HIST1H2BN:HIST1H3I:HIST1H4L:HIST1H3J:HIST1H2BO	http://www.gsea-msigdb.org/gsea/msigdb/cards/REACTOME_TCF_DEPENDENT_SIGNALING_IN_RESPONSE_TO_WNT
Reactome	REACTOME_TRANSCRIPTIONAL_REGULATION_BY_RUNX1	233	13	1.14e-06	3.89e-05	SPI1:PSMC3:HIST1H2BL:HIST1H3H:HIST1H2AJ:HIST1H2BM:HIST1H4J:HIST1H4K:HIST1H2BN:HIST1H3I:HIST1H4L:HIST1H3J:HIST1H2BO	http://www.gsea-msigdb.org/gsea/msigdb/cards/REACTOME_TRANSCRIPTIONAL_REGULATION_BY_RUNX1
Reactome	REACTOME_DNA_DOUBLE_STRAND_BREAK_RESPONSE	76	8	1.27e-06	4.22e-05	EYA2:HIST1H2BL:HIST1H2BM:HIST1H4J:HIST1H4K:HIST1H2BN:HIST1H4L:HIST1H2BO	http://www.gsea-msigdb.org/gsea/msigdb/cards/REACTOME_DNA_DOUBLE_STRAND_BREAK_RESPONSE
Reactome	REACTOME_MEIOTIC_SYNAPSIS	78	8	1.55e-06	4.95e-05	HIST1H2BL:HIST1H2AJ:HIST1H2BM:HIST1H4J:HIST1H4K:HIST1H2BN:HIST1H4L:HIST1H2BO	http://www.gsea-msigdb.org/gsea/msigdb/cards/REACTOME_MEIOTIC_SYNAPSIS
Reactome	REACTOME_RHO_GTPASE_EFFECTORS	320	15	1.55e-06	4.95e-05	NUP160:NCKIPSD:RHOA:HIST1H2BL:HIST1H3H:HIST1H2AJ:HIST1H2BM:HIST1H4J:HIST1H4K:HIST1H2BN:HIST1H3I:HIST1H4L:HIST1H3J:HIST1H2BO:MAD1L1	http://www.gsea-msigdb.org/gsea/msigdb/cards/REACTOME_RHO_GTPASE_EFFECTORS
Reactome	REACTOME_TELOMERE_MAINTENANCE	81	8	2.07e-06	6.45e-05	HIST1H2BL:HIST1H2AJ:HIST1H2BM:HIST1H4J:HIST1H4K:HIST1H2BN:HIST1H4L:HIST1H2BO	http://www.gsea-msigdb.org/gsea/msigdb/cards/REACTOME_TELOMERE_MAINTENANCE
Reactome	REACTOME_DEUBIQUITINATION	295	14	3e-06	9.16e-05	PSMC3:USP19:USP4:RHOA:RNF123:HIST1H2BL:HIST1H2AI:HIST1H2AJ:HIST1H2BM:HIST1H2AK:HIST1H2BN:HIST1H2AL:HIST1H2AM:HIST1H2BO	http://www.gsea-msigdb.org/gsea/msigdb/cards/REACTOME_DEUBIQUITINATION
Reactome	REACTOME_BASE_EXCISION_REPAIR	90	8	4.59e-06	0.00013771	HIST1H2BL:HIST1H2AJ:HIST1H2BM:HIST1H4J:HIST1H4K:HIST1H2BN:HIST1H4L:HIST1H2BO	http://www.gsea-msigdb.org/gsea/msigdb/cards/REACTOME_BASE_EXCISION_REPAIR
Reactome	REACTOME_NONHOMOLOGOUS_END_JOINING_NHEJ	68	7	6.87e-06	0.00020198	HIST1H2BL:HIST1H2BM:HIST1H4J:HIST1H4K:HIST1H2BN:HIST1H4L:HIST1H2BO	http://www.gsea-msigdb.org/gsea/msigdb/cards/REACTOME_NONHOMOLOGOUS_END_JOINING_NHEJ
Reactome	REACTOME_SIGNALING_BY_WNT	322	14	8.16e-06	0.00023519	PSMC3:TCF4:RHOA:HIST1H2BL:HIST1H3H:HIST1H2AJ:HIST1H2BM:HIST1H4J:HIST1H4K:HIST1H2BN:HIST1H3I:HIST1H4L:HIST1H3J:HIST1H2BO	http://www.gsea-msigdb.org/gsea/msigdb/cards/REACTOME_SIGNALING_BY_WNT
Reactome	REACTOME_SIGNALING_BY_NOTCH	240	12	9.02e-06	0.00025521	PSMC3:HIST1H2BL:HIST1H3H:HIST1H2AJ:HIST1H2BM:HIST1H4J:HIST1H4K:HIST1H2BN:HIST1H3I:HIST1H4L:HIST1H3J:HIST1H2BO	http://www.gsea-msigdb.org/gsea/msigdb/cards/REACTOME_SIGNALING_BY_NOTCH
Reactome	REACTOME_CELLULAR_RESPONSES_TO_STRESS	431	16	1.36e-05	0.0003767	ACTR1A:PSMC3:NUP160:GPX1:HIST1H2BL:HIST1H3H:HIST1H2AJ:HIST1H2BM:HIST1H4J:HIST1H4K:HIST1H2BN:HIST1H1B:HIST1H3I:HIST1H4L:HIST1H3J:HIST1H2BO	http://www.gsea-msigdb.org/gsea/msigdb/cards/REACTOME_CELLULAR_RESPONSES_TO_STRESS
Reactome	REACTOME_M_PHASE	387	15	1.53e-05	0.0004157	ACTR1A:PSMC3:NUP160:HIST1H2BL:HIST1H3H:HIST1H2AJ:HIST1H2BM:HIST1H4J:HIST1H4K:HIST1H2BN:HIST1H3I:HIST1H4L:HIST1H3J:HIST1H2BO:MAD1L1	http://www.gsea-msigdb.org/gsea/msigdb/cards/REACTOME_M_PHASE
Reactome	REACTOME_CHROMOSOME_MAINTENANCE	108	8	1.77e-05	0.00047502	HIST1H2BL:HIST1H2AJ:HIST1H2BM:HIST1H4J:HIST1H4K:HIST1H2BN:HIST1H4L:HIST1H2BO	http://www.gsea-msigdb.org/gsea/msigdb/cards/REACTOME_CHROMOSOME_MAINTENANCE
Reactome	REACTOME_ESR_MEDIATED_SIGNALING	218	11	1.95e-05	0.00051387	HIST1H2BL:HIST1H3H:HIST1H2AJ:HIST1H2BM:HIST1H4J:HIST1H4K:HIST1H2BN:HIST1H3I:HIST1H4L:HIST1H3J:HIST1H2BO	http://www.gsea-msigdb.org/gsea/msigdb/cards/REACTOME_ESR_MEDIATED_SIGNALING
Reactome	REACTOME_SIGNALING_BY_RHO_GTPASES	449	16	2.23e-05	0.00057724	NUP160:ARHGAP27:NCKIPSD:RHOA:HIST1H2BL:HIST1H3H:HIST1H2AJ:HIST1H2BM:HIST1H4J:HIST1H4K:HIST1H2BN:HIST1H3I:HIST1H4L:HIST1H3J:HIST1H2BO:MAD1L1	http://www.gsea-msigdb.org/gsea/msigdb/cards/REACTOME_SIGNALING_BY_RHO_GTPASES
Reactome	REACTOME_METALLOPROTEASE_DUBS	36	5	3.38e-05	0.0008595	HIST1H2AI:HIST1H2AJ:HIST1H2AK:HIST1H2AL:HIST1H2AM	http://www.gsea-msigdb.org/gsea/msigdb/cards/REACTOME_METALLOPROTEASE_DUBS
Reactome	REACTOME_SIGNALING_BY_GPCR	1169	28	4.17e-05	0.00104243	OR4B1:OR4X2:OR4X1:OR4S1:OR4C3:OR4C5:OR4A47:STRA6:PRKAR2A:RHOA:GNAT1:OR2B2:OR2B6:OR2W1:OR2B3:OR2J1:OR2J3:OR2J2:OR14J1:OR5V1:OR12D3:OR12D2:OR11A1:OR10C1:OR2H1:GABBR1:OR2H2:GPER1	http://www.gsea-msigdb.org/gsea/msigdb/cards/REACTOME_SIGNALING_BY_GPCR
Reactome	REACTOME_G2_M_DNA_DAMAGE_CHECKPOINT	94	7	5.76e-05	0.00141614	HIST1H2BL:HIST1H2BM:HIST1H4J:HIST1H4K:HIST1H2BN:HIST1H4L:HIST1H2BO	http://www.gsea-msigdb.org/gsea/msigdb/cards/REACTOME_G2_M_DNA_DAMAGE_CHECKPOINT
Reactome	REACTOME_PROCESSING_OF_DNA_DOUBLE_STRAND_BREAK_ENDS	97	7	7.04e-05	0.00170284	HIST1H2BL:HIST1H2BM:HIST1H4J:HIST1H4K:HIST1H2BN:HIST1H4L:HIST1H2BO	http://www.gsea-msigdb.org/gsea/msigdb/cards/REACTOME_PROCESSING_OF_DNA_DOUBLE_STRAND_BREAK_ENDS
Reactome	REACTOME_PKMTS_METHYLATE_HISTONE_LYSINES	68	6	7.62e-05	0.00181214	HIST1H3H:HIST1H4J:HIST1H4K:HIST1H3I:HIST1H4L:HIST1H3J	http://www.gsea-msigdb.org/gsea/msigdb/cards/REACTOME_PKMTS_METHYLATE_HISTONE_LYSINES
Reactome	REACTOME_SIGNALING_BY_NUCLEAR_RECEPTORS	261	11	9.97e-05	0.002334	HIST1H2BL:HIST1H3H:HIST1H2AJ:HIST1H2BM:HIST1H4J:HIST1H4K:HIST1H2BN:HIST1H3I:HIST1H4L:HIST1H3J:HIST1H2BO	http://www.gsea-msigdb.org/gsea/msigdb/cards/REACTOME_SIGNALING_BY_NUCLEAR_RECEPTORS
Reactome	REACTOME_CELLULAR_RESPONSES_TO_EXTERNAL_STIMULI	525	16	0.00013978	0.00322355	ACTR1A:PSMC3:NUP160:GPX1:HIST1H2BL:HIST1H3H:HIST1H2AJ:HIST1H2BM:HIST1H4J:HIST1H4K:HIST1H2BN:HIST1H1B:HIST1H3I:HIST1H4L:HIST1H3J:HIST1H2BO	http://www.gsea-msigdb.org/gsea/msigdb/cards/REACTOME_CELLULAR_RESPONSES_TO_EXTERNAL_STIMULI
Reactome	REACTOME_POST_TRANSLATIONAL_PROTEIN_MODIFICATION	1417	30	0.0001987	0.00451291	NEGR1:ACTR1A:PSMC3:AGBL2:NUP160:NTM:ALG5:USP19:LAMB2:USP4:RHOA:NICN1:DAG1:RNF123:GMPPB:LSAMP:HIST1H2BL:HIST1H2AI:HIST1H2AJ:HIST1H2BM:HIST1H4J:HIST1H4K:HIST1H2AK:HIST1H2BN:HIST1H2AL:HIST1H4L:HIST1H2AM:HIST1H2BO:TRIM27:UBD	http://www.gsea-msigdb.org/gsea/msigdb/cards/REACTOME_POST_TRANSLATIONAL_PROTEIN_MODIFICATION
Reactome	REACTOME_G2_M_CHECKPOINTS	165	8	0.00034724	0.00765464	PSMC3:HIST1H2BL:HIST1H2BM:HIST1H4J:HIST1H4K:HIST1H2BN:HIST1H4L:HIST1H2BO	http://www.gsea-msigdb.org/gsea/msigdb/cards/REACTOME_G2_M_CHECKPOINTS
Reactome	REACTOME_DNA_DOUBLE_STRAND_BREAK_REPAIR	165	8	0.00034724	0.00765464	EYA2:HIST1H2BL:HIST1H2BM:HIST1H4J:HIST1H4K:HIST1H2BN:HIST1H4L:HIST1H2BO	http://www.gsea-msigdb.org/gsea/msigdb/cards/REACTOME_DNA_DOUBLE_STRAND_BREAK_REPAIR
Reactome	REACTOME_GENERIC_TRANSCRIPTION_PATHWAY	1202	26	0.00038357	0.00833298	PCGF6:SPI1:PSMC3:RBFOX1:ZNF568:ZNF420:ZNF585A:ZNF585B:ZNF383:HKR1:MEF2C:HIST1H2BL:HIST1H3H:HIST1H2AJ:HIST1H2BM:HIST1H4J:HIST1H4K:HIST1H2BN:HIST1H3I:HIST1H4L:HIST1H3J:HIST1H2BO:ZKSCAN8:ZKSCAN4:ZKSCAN3:ZNF311	http://www.gsea-msigdb.org/gsea/msigdb/cards/REACTOME_GENERIC_TRANSCRIPTION_PATHWAY
Reactome	REACTOME_CELL_CYCLE_MITOTIC	530	15	0.00048735	0.0104363	ACTR1A:PSMC3:NUP160:HIST1H2BL:HIST1H3H:HIST1H2AJ:HIST1H2BM:HIST1H4J:HIST1H4K:HIST1H2BN:HIST1H3I:HIST1H4L:HIST1H3J:HIST1H2BO:MAD1L1	http://www.gsea-msigdb.org/gsea/msigdb/cards/REACTOME_CELL_CYCLE_MITOTIC
Reactome	REACTOME_HOMOLOGY_DIRECTED_REPAIR	137	7	0.00059269	0.0124078	HIST1H2BL:HIST1H2BM:HIST1H4J:HIST1H4K:HIST1H2BN:HIST1H4L:HIST1H2BO	http://www.gsea-msigdb.org/gsea/msigdb/cards/REACTOME_HOMOLOGY_DIRECTED_REPAIR
Reactome	REACTOME_UCH_PROTEINASES	99	6	0.00059597	0.0124078	PSMC3:HIST1H2AI:HIST1H2AJ:HIST1H2AK:HIST1H2AL:HIST1H2AM	http://www.gsea-msigdb.org/gsea/msigdb/cards/REACTOME_UCH_PROTEINASES
Reactome	REACTOME_DNA_REPAIR	328	11	0.00069765	0.0143257	EYA2:UBA7:HIST1H2BL:HIST1H2AJ:HIST1H2BM:HIST1H4J:HIST1H4K:HIST1H2BN:HIST1H4L:HIST1H2BO:ASCC3	http://www.gsea-msigdb.org/gsea/msigdb/cards/REACTOME_DNA_REPAIR
Reactome	REACTOME_CELL_CYCLE_CHECKPOINTS	288	10	0.0009294	0.0188267	PSMC3:NUP160:HIST1H2BL:HIST1H2BM:HIST1H4J:HIST1H4K:HIST1H2BN:HIST1H4L:HIST1H2BO:MAD1L1	http://www.gsea-msigdb.org/gsea/msigdb/cards/REACTOME_CELL_CYCLE_CHECKPOINTS
Reactome	REACTOME_MECP2_REGULATES_TRANSCRIPTION_FACTORS	5	2	0.00105134	0.0207362	RBFOX1:MEF2C	http://www.gsea-msigdb.org/gsea/msigdb/cards/REACTOME_MECP2_REGULATES_TRANSCRIPTION_FACTORS
Reactome	REACTOME_SIGNALING_BY_MST1	5	2	0.00105134	0.0207362	MST1:MST1R	http://www.gsea-msigdb.org/gsea/msigdb/cards/REACTOME_SIGNALING_BY_MST1
Reactome	REACTOME_GENE_EXPRESSION_TRANSCRIPTION	1467	28	0.00156268	0.0304214	PCGF6:SPI1:PSMC3:NUP160:CLP1:RBFOX1:ZNF568:ZNF420:ZNF585A:ZNF585B:ZNF383:HKR1:MEF2C:HIST1H2BL:HIST1H3H:HIST1H2AJ:HIST1H2BM:HIST1H4J:HIST1H4K:HIST1H2BN:HIST1H3I:HIST1H4L:HIST1H3J:HIST1H2BO:ZKSCAN8:ZKSCAN4:ZKSCAN3:ZNF311	http://www.gsea-msigdb.org/gsea/msigdb/cards/REACTOME_GENE_EXPRESSION_TRANSCRIPTION
Canonical_Pathways	REACTOME_HDACS_DEACETYLATE_HISTONES	91	15	3.49e-14	7.68e-11	HIST1H2BL:HIST1H2AI:HIST1H3H:HIST1H2AJ:HIST1H2BM:HIST1H4J:HIST1H4K:HIST1H2AK:HIST1H2BN:HIST1H2AL:HIST1H3I:HIST1H4L:HIST1H3J:HIST1H2AM:HIST1H2BO	http://www.gsea-msigdb.org/gsea/msigdb/cards/REACTOME_HDACS_DEACETYLATE_HISTONES
Canonical_Pathways	REACTOME_HATS_ACETYLATE_HISTONES	138	16	1.38e-12	1.49e-09	SUPT20H:HIST1H2BL:HIST1H2AI:HIST1H3H:HIST1H2AJ:HIST1H2BM:HIST1H4J:HIST1H4K:HIST1H2AK:HIST1H2BN:HIST1H2AL:HIST1H3I:HIST1H4L:HIST1H3J:HIST1H2AM:HIST1H2BO	http://www.gsea-msigdb.org/gsea/msigdb/cards/REACTOME_HATS_ACETYLATE_HISTONES
Canonical_Pathways	KEGG_SYSTEMIC_LUPUS_ERYTHEMATOSUS	119	15	2.03e-12	1.49e-09	HIST1H2BL:HIST1H2AI:HIST1H3H:HIST1H2AJ:HIST1H2BM:HIST1H4J:HIST1H4K:HIST1H2AK:HIST1H2BN:HIST1H2AL:HIST1H3I:HIST1H4L:HIST1H3J:HIST1H2AM:HIST1H2BO	http://www.gsea-msigdb.org/gsea/msigdb/cards/KEGG_SYSTEMIC_LUPUS_ERYTHEMATOSUS
Canonical_Pathways	REACTOME_DNA_METHYLATION	62	11	4.08e-11	2.24e-08	HIST1H2BL:HIST1H3H:HIST1H2AJ:HIST1H2BM:HIST1H4J:HIST1H4K:HIST1H2BN:HIST1H3I:HIST1H4L:HIST1H3J:HIST1H2BO	http://www.gsea-msigdb.org/gsea/msigdb/cards/REACTOME_DNA_METHYLATION
Canonical_Pathways	REACTOME_ACTIVATED_PKN1_STIMULATES_TRANSCRIPTION_OF_AR_ANDROGEN_RECEPTOR_REGULATED_GENES_KLK2_AND_KLK3	64	11	5.86e-11	2.56e-08	HIST1H2BL:HIST1H3H:HIST1H2AJ:HIST1H2BM:HIST1H4J:HIST1H4K:HIST1H2BN:HIST1H3I:HIST1H4L:HIST1H3J:HIST1H2BO	http://www.gsea-msigdb.org/gsea/msigdb/cards/REACTOME_ACTIVATED_PKN1_STIMULATES_TRANSCRIPTION_OF_AR_ANDROGEN_RECEPTOR_REGULATED_GENES_KLK2_AND_KLK3
Canonical_Pathways	REACTOME_SIRT1_NEGATIVELY_REGULATES_RRNA_EXPRESSION	65	11	6.99e-11	2.56e-08	HIST1H2BL:HIST1H3H:HIST1H2AJ:HIST1H2BM:HIST1H4J:HIST1H4K:HIST1H2BN:HIST1H3I:HIST1H4L:HIST1H3J:HIST1H2BO	http://www.gsea-msigdb.org/gsea/msigdb/cards/REACTOME_SIRT1_NEGATIVELY_REGULATES_RRNA_EXPRESSION
Canonical_Pathways	REACTOME_TRANSCRIPTIONAL_REGULATION_OF_GRANULOPOIESIS	87	12	1.14e-10	3.59e-08	SPI1:HIST1H2BL:HIST1H3H:HIST1H2AJ:HIST1H2BM:HIST1H4J:HIST1H4K:HIST1H2BN:HIST1H3I:HIST1H4L:HIST1H3J:HIST1H2BO	http://www.gsea-msigdb.org/gsea/msigdb/cards/REACTOME_TRANSCRIPTIONAL_REGULATION_OF_GRANULOPOIESIS
Canonical_Pathways	REACTOME_FORMATION_OF_THE_BETA_CATENIN:TCF_TRANSACTIVATING_COMPLEX	89	12	1.5e-10	3.92e-08	TCF4:HIST1H2BL:HIST1H3H:HIST1H2AJ:HIST1H2BM:HIST1H4J:HIST1H4K:HIST1H2BN:HIST1H3I:HIST1H4L:HIST1H3J:HIST1H2BO	http://www.gsea-msigdb.org/gsea/msigdb/cards/REACTOME_FORMATION_OF_THE_BETA_CATENIN:TCF_TRANSACTIVATING_COMPLEX
Canonical_Pathways	REACTOME_PRC2_METHYLATES_HISTONES_AND_DNA	70	11	1.61e-10	3.92e-08	HIST1H2BL:HIST1H3H:HIST1H2AJ:HIST1H2BM:HIST1H4J:HIST1H4K:HIST1H2BN:HIST1H3I:HIST1H4L:HIST1H3J:HIST1H2BO	http://www.gsea-msigdb.org/gsea/msigdb/cards/REACTOME_PRC2_METHYLATES_HISTONES_AND_DNA
Canonical_Pathways	REACTOME_CONDENSATION_OF_PROPHASE_CHROMOSOMES	71	11	1.89e-10	3.92e-08	HIST1H2BL:HIST1H3H:HIST1H2AJ:HIST1H2BM:HIST1H4J:HIST1H4K:HIST1H2BN:HIST1H3I:HIST1H4L:HIST1H3J:HIST1H2BO	http://www.gsea-msigdb.org/gsea/msigdb/cards/REACTOME_CONDENSATION_OF_PROPHASE_CHROMOSOMES
Canonical_Pathways	REACTOME_RHO_GTPASES_ACTIVATE_PKNS	91	12	1.96e-10	3.92e-08	RHOA:HIST1H2BL:HIST1H3H:HIST1H2AJ:HIST1H2BM:HIST1H4J:HIST1H4K:HIST1H2BN:HIST1H3I:HIST1H4L:HIST1H3J:HIST1H2BO	http://www.gsea-msigdb.org/gsea/msigdb/cards/REACTOME_RHO_GTPASES_ACTIVATE_PKNS
Canonical_Pathways	REACTOME_ERCC6_CSB_AND_EHMT2_G9A_POSITIVELY_REGULATE_RRNA_EXPRESSION	72	11	2.21e-10	4.05e-08	HIST1H2BL:HIST1H3H:HIST1H2AJ:HIST1H2BM:HIST1H4J:HIST1H4K:HIST1H2BN:HIST1H3I:HIST1H4L:HIST1H3J:HIST1H2BO	http://www.gsea-msigdb.org/gsea/msigdb/cards/REACTOME_ERCC6_CSB_AND_EHMT2_G9A_POSITIVELY_REGULATE_RRNA_EXPRESSION
Canonical_Pathways	REACTOME_OLFACTORY_SIGNALING_PATHWAY	397	22	2.56e-10	4.33e-08	OR4B1:OR4X2:OR4X1:OR4S1:OR4C3:OR4C5:OR4A47:OR2B2:OR2B6:OR2W1:OR2B3:OR2J1:OR2J3:OR2J2:OR14J1:OR5V1:OR12D3:OR12D2:OR11A1:OR10C1:OR2H1:OR2H2	http://www.gsea-msigdb.org/gsea/msigdb/cards/REACTOME_OLFACTORY_SIGNALING_PATHWAY
Canonical_Pathways	REACTOME_RMTS_METHYLATE_HISTONE_ARGININES	76	11	4.04e-10	6.34e-08	HIST1H2AI:HIST1H3H:HIST1H2AJ:HIST1H4J:HIST1H4K:HIST1H2AK:HIST1H2AL:HIST1H3I:HIST1H4L:HIST1H3J:HIST1H2AM	http://www.gsea-msigdb.org/gsea/msigdb/cards/REACTOME_RMTS_METHYLATE_HISTONE_ARGININES
Canonical_Pathways	REACTOME_BUTYROPHILIN_BTN_FAMILY_INTERACTIONS	11	6	5.29e-10	7.75e-08	BTN3A2:BTN2A2:BTN3A1:BTN3A3:BTN2A1:BTN1A1	http://www.gsea-msigdb.org/gsea/msigdb/cards/REACTOME_BUTYROPHILIN_BTN_FAMILY_INTERACTIONS
Canonical_Pathways	REACTOME_RUNX1_REGULATES_TRANSCRIPTION_OF_GENES_INVOLVED_IN_DIFFERENTIATION_OF_HSCS	125	13	7e-10	9.63e-08	SPI1:PSMC3:HIST1H2BL:HIST1H3H:HIST1H2AJ:HIST1H2BM:HIST1H4J:HIST1H4K:HIST1H2BN:HIST1H3I:HIST1H4L:HIST1H3J:HIST1H2BO	http://www.gsea-msigdb.org/gsea/msigdb/cards/REACTOME_RUNX1_REGULATES_TRANSCRIPTION_OF_GENES_INVOLVED_IN_DIFFERENTIATION_OF_HSCS
Canonical_Pathways	REACTOME_TRANSCRIPTIONAL_REGULATION_BY_SMALL_RNAS	104	12	9.52e-10	1.23e-07	NUP160:HIST1H2BL:HIST1H3H:HIST1H2AJ:HIST1H2BM:HIST1H4J:HIST1H4K:HIST1H2BN:HIST1H3I:HIST1H4L:HIST1H3J:HIST1H2BO	http://www.gsea-msigdb.org/gsea/msigdb/cards/REACTOME_TRANSCRIPTIONAL_REGULATION_BY_SMALL_RNAS
Canonical_Pathways	REACTOME_MEIOTIC_RECOMBINATION	83	11	1.07e-09	1.3e-07	HIST1H2BL:HIST1H3H:HIST1H2AJ:HIST1H2BM:HIST1H4J:HIST1H4K:HIST1H2BN:HIST1H3I:HIST1H4L:HIST1H3J:HIST1H2BO	http://www.gsea-msigdb.org/gsea/msigdb/cards/REACTOME_MEIOTIC_RECOMBINATION
Canonical_Pathways	REACTOME_RNA_POLYMERASE_I_PROMOTER_ESCAPE	86	11	1.57e-09	1.82e-07	HIST1H2BL:HIST1H3H:HIST1H2AJ:HIST1H2BM:HIST1H4J:HIST1H4K:HIST1H2BN:HIST1H3I:HIST1H4L:HIST1H3J:HIST1H2BO	http://www.gsea-msigdb.org/gsea/msigdb/cards/REACTOME_RNA_POLYMERASE_I_PROMOTER_ESCAPE
Canonical_Pathways	REACTOME_CHROMATIN_ORGANIZATION	267	17	3.65e-09	4.01e-07	SUPT20H:HIST1H2BL:HIST1H2AI:HIST1H3H:HIST1H2AJ:HIST1H2BM:HIST1H4J:HIST1H4K:HIST1H2AK:HIST1H2BN:HIST1H2AL:HIST1H3I:HIST1H4L:HIST1H3J:HIST1H2AM:HIST1H2BO:PHF2	http://www.gsea-msigdb.org/gsea/msigdb/cards/REACTOME_CHROMATIN_ORGANIZATION
Canonical_Pathways	REACTOME_ACTIVATION_OF_HOX_GENES_DURING_DIFFERENTIATION	119	12	4.55e-09	4.62e-07	MEIS1:HIST1H2BL:HIST1H3H:HIST1H2AJ:HIST1H2BM:HIST1H4J:HIST1H4K:HIST1H2BN:HIST1H3I:HIST1H4L:HIST1H3J:HIST1H2BO	http://www.gsea-msigdb.org/gsea/msigdb/cards/REACTOME_ACTIVATION_OF_HOX_GENES_DURING_DIFFERENTIATION
Canonical_Pathways	REACTOME_RUNX1_REGULATES_GENES_INVOLVED_IN_MEGAKARYOCYTE_DIFFERENTIATION_AND_PLATELET_FUNCTION	95	11	4.62e-09	4.62e-07	HIST1H2BL:HIST1H3H:HIST1H2AJ:HIST1H2BM:HIST1H4J:HIST1H4K:HIST1H2BN:HIST1H3I:HIST1H4L:HIST1H3J:HIST1H2BO	http://www.gsea-msigdb.org/gsea/msigdb/cards/REACTOME_RUNX1_REGULATES_GENES_INVOLVED_IN_MEGAKARYOCYTE_DIFFERENTIATION_AND_PLATELET_FUNCTION
Canonical_Pathways	KEGG_OLFACTORY_TRANSDUCTION	387	20	5.55e-09	5.3e-07	OR4B1:OR4X2:OR4X1:OR4S1:OR4C3:OR4A47:OR2B2:OR2B6:OR2W1:OR2B3:OR2J3:OR2J2:OR14J1:OR5V1:OR12D3:OR12D2:OR11A1:OR10C1:OR2H1:OR2H2	http://www.gsea-msigdb.org/gsea/msigdb/cards/KEGG_OLFACTORY_TRANSDUCTION
Canonical_Pathways	REACTOME_POSITIVE_EPIGENETIC_REGULATION_OF_RRNA_EXPRESSION	101	11	8.9e-09	8.15e-07	HIST1H2BL:HIST1H3H:HIST1H2AJ:HIST1H2BM:HIST1H4J:HIST1H4K:HIST1H2BN:HIST1H3I:HIST1H4L:HIST1H3J:HIST1H2BO	http://www.gsea-msigdb.org/gsea/msigdb/cards/REACTOME_POSITIVE_EPIGENETIC_REGULATION_OF_RRNA_EXPRESSION
Canonical_Pathways	REACTOME_NEGATIVE_EPIGENETIC_REGULATION_OF_RRNA_EXPRESSION	104	11	1.21e-08	1.07e-06	HIST1H2BL:HIST1H3H:HIST1H2AJ:HIST1H2BM:HIST1H4J:HIST1H4K:HIST1H2BN:HIST1H3I:HIST1H4L:HIST1H3J:HIST1H2BO	http://www.gsea-msigdb.org/gsea/msigdb/cards/REACTOME_NEGATIVE_EPIGENETIC_REGULATION_OF_RRNA_EXPRESSION
Canonical_Pathways	REACTOME_RNA_POLYMERASE_I_TRANSCRIPTION	105	11	1.34e-08	1.14e-06	HIST1H2BL:HIST1H3H:HIST1H2AJ:HIST1H2BM:HIST1H4J:HIST1H4K:HIST1H2BN:HIST1H3I:HIST1H4L:HIST1H3J:HIST1H2BO	http://www.gsea-msigdb.org/gsea/msigdb/cards/REACTOME_RNA_POLYMERASE_I_TRANSCRIPTION
Canonical_Pathways	REACTOME_AMYLOID_FIBER_FORMATION	106	11	1.49e-08	1.17e-06	HIST1H2BL:HIST1H3H:HIST1H2AJ:HIST1H2BM:HIST1H4J:HIST1H4K:HIST1H2BN:HIST1H3I:HIST1H4L:HIST1H3J:HIST1H2BO	http://www.gsea-msigdb.org/gsea/msigdb/cards/REACTOME_AMYLOID_FIBER_FORMATION
Canonical_Pathways	REACTOME_SENESCENCE_ASSOCIATED_SECRETORY_PHENOTYPE_SASP	106	11	1.49e-08	1.17e-06	HIST1H2BL:HIST1H3H:HIST1H2AJ:HIST1H2BM:HIST1H4J:HIST1H4K:HIST1H2BN:HIST1H3I:HIST1H4L:HIST1H3J:HIST1H2BO	http://www.gsea-msigdb.org/gsea/msigdb/cards/REACTOME_SENESCENCE_ASSOCIATED_SECRETORY_PHENOTYPE_SASP
Canonical_Pathways	REACTOME_GENE_SILENCING_BY_RNA	135	12	1.91e-08	1.45e-06	NUP160:HIST1H2BL:HIST1H3H:HIST1H2AJ:HIST1H2BM:HIST1H4J:HIST1H4K:HIST1H2BN:HIST1H3I:HIST1H4L:HIST1H3J:HIST1H2BO	http://www.gsea-msigdb.org/gsea/msigdb/cards/REACTOME_GENE_SILENCING_BY_RNA
Canonical_Pathways	REACTOME_MITOTIC_PROPHASE	140	12	2.88e-08	2.11e-06	NUP160:HIST1H2BL:HIST1H3H:HIST1H2AJ:HIST1H2BM:HIST1H4J:HIST1H4K:HIST1H2BN:HIST1H3I:HIST1H4L:HIST1H3J:HIST1H2BO	http://www.gsea-msigdb.org/gsea/msigdb/cards/REACTOME_MITOTIC_PROPHASE
Canonical_Pathways	REACTOME_MEIOSIS	115	11	3.5e-08	2.48e-06	HIST1H2BL:HIST1H3H:HIST1H2AJ:HIST1H2BM:HIST1H4J:HIST1H4K:HIST1H2BN:HIST1H3I:HIST1H4L:HIST1H3J:HIST1H2BO	http://www.gsea-msigdb.org/gsea/msigdb/cards/REACTOME_MEIOSIS
Canonical_Pathways	REACTOME_PRE_NOTCH_EXPRESSION_AND_PROCESSING	116	11	3.83e-08	2.63e-06	HIST1H2BL:HIST1H3H:HIST1H2AJ:HIST1H2BM:HIST1H4J:HIST1H4K:HIST1H2BN:HIST1H3I:HIST1H4L:HIST1H3J:HIST1H2BO	http://www.gsea-msigdb.org/gsea/msigdb/cards/REACTOME_PRE_NOTCH_EXPRESSION_AND_PROCESSING
Canonical_Pathways	REACTOME_OXIDATIVE_STRESS_INDUCED_SENESCENCE	121	11	5.94e-08	3.96e-06	HIST1H2BL:HIST1H3H:HIST1H2AJ:HIST1H2BM:HIST1H4J:HIST1H4K:HIST1H2BN:HIST1H3I:HIST1H4L:HIST1H3J:HIST1H2BO	http://www.gsea-msigdb.org/gsea/msigdb/cards/REACTOME_OXIDATIVE_STRESS_INDUCED_SENESCENCE
Canonical_Pathways	REACTOME_G_ALPHA_S_SIGNALLING_EVENTS	539	22	6.59e-08	4.27e-06	OR4B1:OR4X2:OR4X1:OR4S1:OR4C3:OR4C5:OR4A47:OR2B2:OR2B6:OR2W1:OR2B3:OR2J1:OR2J3:OR2J2:OR14J1:OR5V1:OR12D3:OR12D2:OR11A1:OR10C1:OR2H1:OR2H2	http://www.gsea-msigdb.org/gsea/msigdb/cards/REACTOME_G_ALPHA_S_SIGNALLING_EVENTS
Canonical_Pathways	REACTOME_DEPURINATION	55	8	9.89e-08	6.21e-06	HIST1H2BL:HIST1H2AJ:HIST1H2BM:HIST1H4J:HIST1H4K:HIST1H2BN:HIST1H4L:HIST1H2BO	http://www.gsea-msigdb.org/gsea/msigdb/cards/REACTOME_DEPURINATION
Canonical_Pathways	REACTOME_DNA_DAMAGE_TELOMERE_STRESS_INDUCED_SENESCENCE	79	9	1.37e-07	8.37e-06	HIST1H2BL:HIST1H2AJ:HIST1H2BM:HIST1H4J:HIST1H4K:HIST1H2BN:HIST1H1B:HIST1H4L:HIST1H2BO	http://www.gsea-msigdb.org/gsea/msigdb/cards/REACTOME_DNA_DAMAGE_TELOMERE_STRESS_INDUCED_SENESCENCE
Canonical_Pathways	REACTOME_BASE_EXCISION_REPAIR_AP_SITE_FORMATION	62	8	2.58e-07	1.53e-05	HIST1H2BL:HIST1H2AJ:HIST1H2BM:HIST1H4J:HIST1H4K:HIST1H2BN:HIST1H4L:HIST1H2BO	http://www.gsea-msigdb.org/gsea/msigdb/cards/REACTOME_BASE_EXCISION_REPAIR_AP_SITE_FORMATION
Canonical_Pathways	REACTOME_REPRODUCTION	141	11	2.85e-07	1.65e-05	HIST1H2BL:HIST1H3H:HIST1H2AJ:HIST1H2BM:HIST1H4J:HIST1H4K:HIST1H2BN:HIST1H3I:HIST1H4L:HIST1H3J:HIST1H2BO	http://www.gsea-msigdb.org/gsea/msigdb/cards/REACTOME_REPRODUCTION
Canonical_Pathways	REACTOME_EPIGENETIC_REGULATION_OF_GENE_EXPRESSION	142	11	3.06e-07	1.72e-05	HIST1H2BL:HIST1H3H:HIST1H2AJ:HIST1H2BM:HIST1H4J:HIST1H4K:HIST1H2BN:HIST1H3I:HIST1H4L:HIST1H3J:HIST1H2BO	http://www.gsea-msigdb.org/gsea/msigdb/cards/REACTOME_EPIGENETIC_REGULATION_OF_GENE_EXPRESSION
Canonical_Pathways	REACTOME_ESTROGEN_DEPENDENT_GENE_EXPRESSION	147	11	4.33e-07	2.38e-05	HIST1H2BL:HIST1H3H:HIST1H2AJ:HIST1H2BM:HIST1H4J:HIST1H4K:HIST1H2BN:HIST1H3I:HIST1H4L:HIST1H3J:HIST1H2BO	http://www.gsea-msigdb.org/gsea/msigdb/cards/REACTOME_ESTROGEN_DEPENDENT_GENE_EXPRESSION
Canonical_Pathways	REACTOME_HDMS_DEMETHYLATE_HISTONES	46	7	4.61e-07	2.47e-05	HIST1H3H:HIST1H4J:HIST1H4K:HIST1H3I:HIST1H4L:HIST1H3J:PHF2	http://www.gsea-msigdb.org/gsea/msigdb/cards/REACTOME_HDMS_DEMETHYLATE_HISTONES
Canonical_Pathways	REACTOME_UB_SPECIFIC_PROCESSING_PROTEASES	218	13	5.4e-07	2.83e-05	PSMC3:USP19:USP4:RNF123:HIST1H2BL:HIST1H2AI:HIST1H2AJ:HIST1H2BM:HIST1H2AK:HIST1H2BN:HIST1H2AL:HIST1H2AM:HIST1H2BO	http://www.gsea-msigdb.org/gsea/msigdb/cards/REACTOME_UB_SPECIFIC_PROCESSING_PROTEASES
Canonical_Pathways	REACTOME_CELLULAR_SENESCENCE	190	12	8.05e-07	4.12e-05	HIST1H2BL:HIST1H3H:HIST1H2AJ:HIST1H2BM:HIST1H4J:HIST1H4K:HIST1H2BN:HIST1H1B:HIST1H3I:HIST1H4L:HIST1H3J:HIST1H2BO	http://www.gsea-msigdb.org/gsea/msigdb/cards/REACTOME_CELLULAR_SENESCENCE
Canonical_Pathways	REACTOME_NUCLEOSOME_ASSEMBLY	72	8	8.34e-07	4.17e-05	HIST1H2BL:HIST1H2AJ:HIST1H2BM:HIST1H4J:HIST1H4K:HIST1H2BN:HIST1H4L:HIST1H2BO	http://www.gsea-msigdb.org/gsea/msigdb/cards/REACTOME_NUCLEOSOME_ASSEMBLY
Canonical_Pathways	REACTOME_TCF_DEPENDENT_SIGNALING_IN_RESPONSE_TO_WNT	227	13	8.52e-07	4.17e-05	PSMC3:TCF4:HIST1H2BL:HIST1H3H:HIST1H2AJ:HIST1H2BM:HIST1H4J:HIST1H4K:HIST1H2BN:HIST1H3I:HIST1H4L:HIST1H3J:HIST1H2BO	http://www.gsea-msigdb.org/gsea/msigdb/cards/REACTOME_TCF_DEPENDENT_SIGNALING_IN_RESPONSE_TO_WNT
Canonical_Pathways	REACTOME_TRANSCRIPTIONAL_REGULATION_BY_RUNX1	233	13	1.14e-06	5.46e-05	SPI1:PSMC3:HIST1H2BL:HIST1H3H:HIST1H2AJ:HIST1H2BM:HIST1H4J:HIST1H4K:HIST1H2BN:HIST1H3I:HIST1H4L:HIST1H3J:HIST1H2BO	http://www.gsea-msigdb.org/gsea/msigdb/cards/REACTOME_TRANSCRIPTIONAL_REGULATION_BY_RUNX1
Canonical_Pathways	REACTOME_DNA_DOUBLE_STRAND_BREAK_RESPONSE	76	8	1.27e-06	5.93e-05	EYA2:HIST1H2BL:HIST1H2BM:HIST1H4J:HIST1H4K:HIST1H2BN:HIST1H4L:HIST1H2BO	http://www.gsea-msigdb.org/gsea/msigdb/cards/REACTOME_DNA_DOUBLE_STRAND_BREAK_RESPONSE
Canonical_Pathways	REACTOME_MEIOTIC_SYNAPSIS	78	8	1.55e-06	6.96e-05	HIST1H2BL:HIST1H2AJ:HIST1H2BM:HIST1H4J:HIST1H4K:HIST1H2BN:HIST1H4L:HIST1H2BO	http://www.gsea-msigdb.org/gsea/msigdb/cards/REACTOME_MEIOTIC_SYNAPSIS
Canonical_Pathways	REACTOME_RHO_GTPASE_EFFECTORS	320	15	1.55e-06	6.96e-05	NUP160:NCKIPSD:RHOA:HIST1H2BL:HIST1H3H:HIST1H2AJ:HIST1H2BM:HIST1H4J:HIST1H4K:HIST1H2BN:HIST1H3I:HIST1H4L:HIST1H3J:HIST1H2BO:MAD1L1	http://www.gsea-msigdb.org/gsea/msigdb/cards/REACTOME_RHO_GTPASE_EFFECTORS
Canonical_Pathways	REACTOME_TELOMERE_MAINTENANCE	81	8	2.07e-06	9.09e-05	HIST1H2BL:HIST1H2AJ:HIST1H2BM:HIST1H4J:HIST1H4K:HIST1H2BN:HIST1H4L:HIST1H2BO	http://www.gsea-msigdb.org/gsea/msigdb/cards/REACTOME_TELOMERE_MAINTENANCE
Canonical_Pathways	REACTOME_DEUBIQUITINATION	295	14	3e-06	0.00012918	PSMC3:USP19:USP4:RHOA:RNF123:HIST1H2BL:HIST1H2AI:HIST1H2AJ:HIST1H2BM:HIST1H2AK:HIST1H2BN:HIST1H2AL:HIST1H2AM:HIST1H2BO	http://www.gsea-msigdb.org/gsea/msigdb/cards/REACTOME_DEUBIQUITINATION
Canonical_Pathways	REACTOME_BASE_EXCISION_REPAIR	90	8	4.59e-06	0.00019424	HIST1H2BL:HIST1H2AJ:HIST1H2BM:HIST1H4J:HIST1H4K:HIST1H2BN:HIST1H4L:HIST1H2BO	http://www.gsea-msigdb.org/gsea/msigdb/cards/REACTOME_BASE_EXCISION_REPAIR
Canonical_Pathways	REACTOME_NONHOMOLOGOUS_END_JOINING_NHEJ	68	7	6.87e-06	0.00028512	HIST1H2BL:HIST1H2BM:HIST1H4J:HIST1H4K:HIST1H2BN:HIST1H4L:HIST1H2BO	http://www.gsea-msigdb.org/gsea/msigdb/cards/REACTOME_NONHOMOLOGOUS_END_JOINING_NHEJ
Canonical_Pathways	REACTOME_SIGNALING_BY_WNT	322	14	8.16e-06	0.00033224	PSMC3:TCF4:RHOA:HIST1H2BL:HIST1H3H:HIST1H2AJ:HIST1H2BM:HIST1H4J:HIST1H4K:HIST1H2BN:HIST1H3I:HIST1H4L:HIST1H3J:HIST1H2BO	http://www.gsea-msigdb.org/gsea/msigdb/cards/REACTOME_SIGNALING_BY_WNT
Canonical_Pathways	REACTOME_SIGNALING_BY_NOTCH	240	12	9.02e-06	0.00036077	PSMC3:HIST1H2BL:HIST1H3H:HIST1H2AJ:HIST1H2BM:HIST1H4J:HIST1H4K:HIST1H2BN:HIST1H3I:HIST1H4L:HIST1H3J:HIST1H2BO	http://www.gsea-msigdb.org/gsea/msigdb/cards/REACTOME_SIGNALING_BY_NOTCH
Canonical_Pathways	REACTOME_CELLULAR_RESPONSES_TO_STRESS	431	16	1.36e-05	0.00053288	ACTR1A:PSMC3:NUP160:GPX1:HIST1H2BL:HIST1H3H:HIST1H2AJ:HIST1H2BM:HIST1H4J:HIST1H4K:HIST1H2BN:HIST1H1B:HIST1H3I:HIST1H4L:HIST1H3J:HIST1H2BO	http://www.gsea-msigdb.org/gsea/msigdb/cards/REACTOME_CELLULAR_RESPONSES_TO_STRESS
Canonical_Pathways	REACTOME_M_PHASE	387	15	1.53e-05	0.00058842	ACTR1A:PSMC3:NUP160:HIST1H2BL:HIST1H3H:HIST1H2AJ:HIST1H2BM:HIST1H4J:HIST1H4K:HIST1H2BN:HIST1H3I:HIST1H4L:HIST1H3J:HIST1H2BO:MAD1L1	http://www.gsea-msigdb.org/gsea/msigdb/cards/REACTOME_M_PHASE
Canonical_Pathways	REACTOME_CHROMOSOME_MAINTENANCE	108	8	1.77e-05	0.00067281	HIST1H2BL:HIST1H2AJ:HIST1H2BM:HIST1H4J:HIST1H4K:HIST1H2BN:HIST1H4L:HIST1H2BO	http://www.gsea-msigdb.org/gsea/msigdb/cards/REACTOME_CHROMOSOME_MAINTENANCE
Canonical_Pathways	REACTOME_ESR_MEDIATED_SIGNALING	218	11	1.95e-05	0.00072828	HIST1H2BL:HIST1H3H:HIST1H2AJ:HIST1H2BM:HIST1H4J:HIST1H4K:HIST1H2BN:HIST1H3I:HIST1H4L:HIST1H3J:HIST1H2BO	http://www.gsea-msigdb.org/gsea/msigdb/cards/REACTOME_ESR_MEDIATED_SIGNALING
Canonical_Pathways	REACTOME_SIGNALING_BY_RHO_GTPASES	449	16	2.23e-05	0.00081857	NUP160:ARHGAP27:NCKIPSD:RHOA:HIST1H2BL:HIST1H3H:HIST1H2AJ:HIST1H2BM:HIST1H4J:HIST1H4K:HIST1H2BN:HIST1H3I:HIST1H4L:HIST1H3J:HIST1H2BO:MAD1L1	http://www.gsea-msigdb.org/gsea/msigdb/cards/REACTOME_SIGNALING_BY_RHO_GTPASES
Canonical_Pathways	REACTOME_METALLOPROTEASE_DUBS	36	5	3.38e-05	0.00121953	HIST1H2AI:HIST1H2AJ:HIST1H2AK:HIST1H2AL:HIST1H2AM	http://www.gsea-msigdb.org/gsea/msigdb/cards/REACTOME_METALLOPROTEASE_DUBS
Canonical_Pathways	REACTOME_SIGNALING_BY_GPCR	1169	28	4.17e-05	0.00147989	OR4B1:OR4X2:OR4X1:OR4S1:OR4C3:OR4C5:OR4A47:STRA6:PRKAR2A:RHOA:GNAT1:OR2B2:OR2B6:OR2W1:OR2B3:OR2J1:OR2J3:OR2J2:OR14J1:OR5V1:OR12D3:OR12D2:OR11A1:OR10C1:OR2H1:GABBR1:OR2H2:GPER1	http://www.gsea-msigdb.org/gsea/msigdb/cards/REACTOME_SIGNALING_BY_GPCR
Canonical_Pathways	REACTOME_G2_M_DNA_DAMAGE_CHECKPOINT	94	7	5.76e-05	0.00201149	HIST1H2BL:HIST1H2BM:HIST1H4J:HIST1H4K:HIST1H2BN:HIST1H4L:HIST1H2BO	http://www.gsea-msigdb.org/gsea/msigdb/cards/REACTOME_G2_M_DNA_DAMAGE_CHECKPOINT
Canonical_Pathways	REACTOME_PROCESSING_OF_DNA_DOUBLE_STRAND_BREAK_ENDS	97	7	7.04e-05	0.00241997	HIST1H2BL:HIST1H2BM:HIST1H4J:HIST1H4K:HIST1H2BN:HIST1H4L:HIST1H2BO	http://www.gsea-msigdb.org/gsea/msigdb/cards/REACTOME_PROCESSING_OF_DNA_DOUBLE_STRAND_BREAK_ENDS
Canonical_Pathways	REACTOME_PKMTS_METHYLATE_HISTONE_LYSINES	68	6	7.62e-05	0.00257658	HIST1H3H:HIST1H4J:HIST1H4K:HIST1H3I:HIST1H4L:HIST1H3J	http://www.gsea-msigdb.org/gsea/msigdb/cards/REACTOME_PKMTS_METHYLATE_HISTONE_LYSINES
Canonical_Pathways	REACTOME_SIGNALING_BY_NUCLEAR_RECEPTORS	261	11	9.97e-05	0.00332016	HIST1H2BL:HIST1H3H:HIST1H2AJ:HIST1H2BM:HIST1H4J:HIST1H4K:HIST1H2BN:HIST1H3I:HIST1H4L:HIST1H3J:HIST1H2BO	http://www.gsea-msigdb.org/gsea/msigdb/cards/REACTOME_SIGNALING_BY_NUCLEAR_RECEPTORS
Canonical_Pathways	REACTOME_CELLULAR_RESPONSES_TO_EXTERNAL_STIMULI	525	16	0.00013978	0.00458771	ACTR1A:PSMC3:NUP160:GPX1:HIST1H2BL:HIST1H3H:HIST1H2AJ:HIST1H2BM:HIST1H4J:HIST1H4K:HIST1H2BN:HIST1H1B:HIST1H3I:HIST1H4L:HIST1H3J:HIST1H2BO	http://www.gsea-msigdb.org/gsea/msigdb/cards/REACTOME_CELLULAR_RESPONSES_TO_EXTERNAL_STIMULI
Canonical_Pathways	REACTOME_POST_TRANSLATIONAL_PROTEIN_MODIFICATION	1417	30	0.0001987	0.00642563	NEGR1:ACTR1A:PSMC3:AGBL2:NUP160:NTM:ALG5:USP19:LAMB2:USP4:RHOA:NICN1:DAG1:RNF123:GMPPB:LSAMP:HIST1H2BL:HIST1H2AI:HIST1H2AJ:HIST1H2BM:HIST1H4J:HIST1H4K:HIST1H2AK:HIST1H2BN:HIST1H2AL:HIST1H4L:HIST1H2AM:HIST1H2BO:TRIM27:UBD	http://www.gsea-msigdb.org/gsea/msigdb/cards/REACTOME_POST_TRANSLATIONAL_PROTEIN_MODIFICATION
Canonical_Pathways	REACTOME_DNA_DOUBLE_STRAND_BREAK_REPAIR	165	8	0.00034724	0.0109084	EYA2:HIST1H2BL:HIST1H2BM:HIST1H4J:HIST1H4K:HIST1H2BN:HIST1H4L:HIST1H2BO	http://www.gsea-msigdb.org/gsea/msigdb/cards/REACTOME_DNA_DOUBLE_STRAND_BREAK_REPAIR
Canonical_Pathways	REACTOME_G2_M_CHECKPOINTS	165	8	0.00034724	0.0109084	PSMC3:HIST1H2BL:HIST1H2BM:HIST1H4J:HIST1H4K:HIST1H2BN:HIST1H4L:HIST1H2BO	http://www.gsea-msigdb.org/gsea/msigdb/cards/REACTOME_G2_M_CHECKPOINTS
Canonical_Pathways	REACTOME_GENERIC_TRANSCRIPTION_PATHWAY	1202	26	0.00038357	0.01188	PCGF6:SPI1:PSMC3:RBFOX1:ZNF568:ZNF420:ZNF585A:ZNF585B:ZNF383:HKR1:MEF2C:HIST1H2BL:HIST1H3H:HIST1H2AJ:HIST1H2BM:HIST1H4J:HIST1H4K:HIST1H2BN:HIST1H3I:HIST1H4L:HIST1H3J:HIST1H2BO:ZKSCAN8:ZKSCAN4:ZKSCAN3:ZNF311	http://www.gsea-msigdb.org/gsea/msigdb/cards/REACTOME_GENERIC_TRANSCRIPTION_PATHWAY
Canonical_Pathways	REACTOME_CELL_CYCLE_MITOTIC	530	15	0.00048735	0.0148846	ACTR1A:PSMC3:NUP160:HIST1H2BL:HIST1H3H:HIST1H2AJ:HIST1H2BM:HIST1H4J:HIST1H4K:HIST1H2BN:HIST1H3I:HIST1H4L:HIST1H3J:HIST1H2BO:MAD1L1	http://www.gsea-msigdb.org/gsea/msigdb/cards/REACTOME_CELL_CYCLE_MITOTIC
Canonical_Pathways	REACTOME_HOMOLOGY_DIRECTED_REPAIR	137	7	0.00059269	0.01771	HIST1H2BL:HIST1H2BM:HIST1H4J:HIST1H4K:HIST1H2BN:HIST1H4L:HIST1H2BO	http://www.gsea-msigdb.org/gsea/msigdb/cards/REACTOME_HOMOLOGY_DIRECTED_REPAIR
Canonical_Pathways	REACTOME_UCH_PROTEINASES	99	6	0.00059597	0.01771	PSMC3:HIST1H2AI:HIST1H2AJ:HIST1H2AK:HIST1H2AL:HIST1H2AM	http://www.gsea-msigdb.org/gsea/msigdb/cards/REACTOME_UCH_PROTEINASES
Canonical_Pathways	REACTOME_DNA_REPAIR	328	11	0.00069765	0.020455	EYA2:UBA7:HIST1H2BL:HIST1H2AJ:HIST1H2BM:HIST1H4J:HIST1H4K:HIST1H2BN:HIST1H4L:HIST1H2BO:ASCC3	http://www.gsea-msigdb.org/gsea/msigdb/cards/REACTOME_DNA_REPAIR
Canonical_Pathways	REACTOME_CELL_CYCLE_CHECKPOINTS	288	10	0.0009294	0.0268915	PSMC3:NUP160:HIST1H2BL:HIST1H2BM:HIST1H4J:HIST1H4K:HIST1H2BN:HIST1H4L:HIST1H2BO:MAD1L1	http://www.gsea-msigdb.org/gsea/msigdb/cards/REACTOME_CELL_CYCLE_CHECKPOINTS
Canonical_Pathways	BIOCARTA_MSP_PATHWAY	5	2	0.00105134	0.0292644	MST1:MST1R	http://www.gsea-msigdb.org/gsea/msigdb/cards/BIOCARTA_MSP_PATHWAY
Canonical_Pathways	REACTOME_SIGNALING_BY_MST1	5	2	0.00105134	0.0292644	MST1:MST1R	http://www.gsea-msigdb.org/gsea/msigdb/cards/REACTOME_SIGNALING_BY_MST1
Canonical_Pathways	REACTOME_MECP2_REGULATES_TRANSCRIPTION_FACTORS	5	2	0.00105134	0.0292644	RBFOX1:MEF2C	http://www.gsea-msigdb.org/gsea/msigdb/cards/REACTOME_MECP2_REGULATES_TRANSCRIPTION_FACTORS
Canonical_Pathways	REACTOME_GENE_EXPRESSION_TRANSCRIPTION	1467	28	0.00156268	0.0429541	PCGF6:SPI1:PSMC3:NUP160:CLP1:RBFOX1:ZNF568:ZNF420:ZNF585A:ZNF585B:ZNF383:HKR1:MEF2C:HIST1H2BL:HIST1H3H:HIST1H2AJ:HIST1H2BM:HIST1H4J:HIST1H4K:HIST1H2BN:HIST1H3I:HIST1H4L:HIST1H3J:HIST1H2BO:ZKSCAN8:ZKSCAN4:ZKSCAN3:ZNF311	http://www.gsea-msigdb.org/gsea/msigdb/cards/REACTOME_GENE_EXPRESSION_TRANSCRIPTION

[truncated: 4 more sheets: Table S11, Table S12, Table S13, Table S14]
